# Supplementary material for: A universal approach to investigate circRNA protein coding function
Source: PubMed Central journal article supplement (PMC6690939; doi:10.1038/s41598-019-48224-y), 2019-08-12
Supplement: 41598_2019_48224_MOESM1_ESM.pdf [file 41598_2019_48224_MOESM1_ESM.pdf]

## Supplementary information

### A universal approach to investigate circRNA protein coding function

#### Running title: Intron-mediated enhancement boosts circRNA translation

Dingding Mo<sup>1,2,\*</sup>, Xinping Li<sup>1</sup>, Carsten A. Raabe<sup>3,4,5</sup>, Di Cui<sup>1</sup>, Jeanne-Franca Vollmar<sup>1</sup>, Timofey S. Rozhdestvensky<sup>2</sup>, Boris V. Skryabin<sup>2</sup>, Juergen Brosius<sup>3,6</sup>

1. Max Planck Institute for Biology of Ageing, Joseph-Stelzmann-Strasse 9b, 50931 Cologne, Germany.
2. Medical Faculty, Core Facility Transgenic Animal and Genetic Engineering Models (TRAM), University of Münster, Von-Esmarch-Str. 56, D-48149 Münster, Germany.
3. Institute of Experimental Pathology, Centre for Molecular Biology of Inflammation (ZMBE), University of Münster, Von-Esmarch-Str. 56, D-48149 Münster, Germany.
4. Brandenburg Medical School (MHB), Fehrbelliner Strasse 38, D-16816 Neuruppin, Germany.
5. Institute of Medical Biochemistry, Centre for Molecular Biology of Inflammation (ZMBE), University of Münster, Von-Esmarch-Strasse 56, D-48149 Münster, Germany.
6. Institutes for Systems Genetics, West China Hospital, Sichuan University, Chengdu 610041, China.

\*. To whom correspondence should be addressed. E-mail: [modingding@163.com](mailto:modingding@163.com)

## Supplementary Fig. 1

A.

|            |            |            |            |            |
|------------|------------|------------|------------|------------|
| MEDIDQSSLV | SSSADSPPRP | PPAFKYQFVT | EPEDEEDEED | EEEEDEDEDL |
| 60         | 70         | 80         | 90         | 100        |
| EELEVLERKP | AAGLSAAPVP | PAAAPLLDFS | SDSVPPAPRG | PLPAAPPTAP |
| 110        | 120        | 130        | 140        | 150        |
| ERQPSWERSP | AASAPSLPPA | AAVLPSKLPE | DDEPPARPPA | PAGASPLAEP |
| 160        | 170        | 180        | 190        | 200        |
| AAPPSTPAAP | KRRGSGSVDE | TLFALPAASE | PVIPSSAEKI | MDLKEQPGNT |
| 210        | 220        | 230        | 240        | 250        |
| VSSGQEDFPS | VLFETAASLP | SLSPLSTVSF | KEHGYLEGNS | AVASTEETIE |
| 260        | 270        | 280        | 290        | 300        |
| ETLNEASREL | PERATNPFVN | RESAEFSVLE | YSEMGSFNG  | SPKGESAMLV |
| 310        | 320        | 330        | 340        | 350        |
| ENTKEEVIVR | SKDKEDLVCS | AALHNPQESP | ATLTKVVKED | GVMSPKMTD  |
| 360        | 370        | 380        | 390        | 400        |
| IFNEMKMSVV | APVREEYADF | KPFEQAWEVK | DTYEGSRDVL | AARANMESKV |
| 410        | 420        | 430        | 440        | 450        |
| DKKCFEDSLE | QKGGKDSSES | RNENASFPRT | PELVKDGSR  | YITCDSFSSA |
| 460        | 470        | 480        | 490        | 500        |
| TESTAANIFP | VLEDHTSENK | TDEKKIEERK | AQIITEKTSP | KTSNPFLVAI |
| 510        | 520        | 530        | 540        | 550        |
| HDSEADYVTT | DNLSKVTEAV | VATMPEGLTP | DLVQEACESE | LNEATGTKIA |
| 560        | 570        | 580        | 590        | 600        |
| YETKVDLVQT | SEAIQESIYP | TAQLCPSFEE | AEATPSPVLP | DIVMEAPLNS |
| 610        | 620        | 630        | 640        | 650        |
| LLPSTGASVA | QPSASPLEVP | SPVSYDGIKL | EPENPPPYEE | AMSVALKTSD |
| 660        | 670        | 680        | 690        | 700        |
| SKEEIKEPES | FNAAAQEAEA | PYISIACDLI | KETKLSTEPS | PEFSNYSEIA |
| 710        | 720        | 730        | 740        | 750        |
| KFEKSVDPHC | ELVDDSSPES | EPVDLFSDDS | IPEVPQTQEE | AVMLMKESLT |
| 760        | 770        | 780        | 790        | 800        |
| EVSETVTQHK | HKERLSASPO | EVGKPYLESF | QPNLHITKDA | ASNEIPTLTK |
| 810        | 820        | 830        | 840        | 850        |
| KETISLQMEE | FNTAIYSNDD | LLSSKEDKMK | ESETFSDSSP | IEIIDEFPTF |
| 860        | 870        | 880        | 890        | 900        |
| VSAKDDSPKE | YTDLEVSNKS | EIANVQSGAN | SLPCSELPCD | LSFKNTYPKD |
| 910        | 920        | 930        | 940        | 950        |
| EAHVSDEFSK | SRSSSVKVPL | LLPNVSALES | QIEMGNIVKP | KVLTKEAEEK |
| 960        | 970        | 980        | 990        | 1000       |
| LPSDTEKEDR | SLTAVLSAEL | NKTSVVDLLY | WRDIKKTGVV | FGASLFLLLS |
| 1010       | 1020       | 1030       | 1040       | 1050       |
| LTVFSIVSVT | AYIALALLSV | TISFRIYKGV | IQAIQKSDEG | HPFRAYLESE |
| 1060       | 1070       | 1080       | 1090       | 1100       |
| VAISEELVQK | YSNSALGHVN | STIKELRRLF | LVDDLVDLSL | FAVLMWVFTY |
| 1110       | 1120       | 1130       | 1140       | 1150       |
| VGALFNGLTL | LILALISLFS | IPVIYERHQA | QIDHYLGLAN | KSVKDAMAKI |
| 1160       |            |            |            |            |
| QAKIPGLKRR | AE         |            |            |            |

### A. Full protein sequence of mouse Rtn4.

The contributions of exon 2 and 3 are highlighted in yellow and green, respectively. The glutamic acid codon (represented by E at position 188 of the protein sequence) is contributed by both exons, while the aspartic acid residue D at position 169 (highlighted in blue) resulted from circularization and remains D in the product of circular translation.

B.

|             |            |             |            |            |
|-------------|------------|-------------|------------|------------|
| MDLKEQPGNT  | VSSGOEDFPS | VLFFETAASLP | SLSPLSTVSF | KEHGylGNLS |
| 10          | 20         | 30          | 40         | 50         |
| AVASTEgTIE  | ETLNEASREL | PERATNPfVN  | RESAEfSVLE | YSEMgSSFNG |
| 60          | 270        | 80          | 90         | 100        |
| SPKGESAMLV  | ENTKEEVIVR | SKDKEDLVCS  | AALHNPQESP | ATLTKVVKED |
| 110         | 120        | 130         | 140        | 150        |
| GVMSPEKTMD  | IFNEMKMSVV | APVREEYADF  | KPFEQAWEVK | DTYEGSRDVL |
| 160         | 170        | 180         | 190        | 200        |
| AARANMESKV  | DKKCFEDSLE | QKGHGKDSES  | RNENASFPRT | PELVKDGsRA |
| 210         | 220        | 230         | 240        | 250        |
| YITCDSfSSA  | TESTAANIFP | VLEDHTSENK  | TDEKKIEERK | AQIITEKTSP |
| 260         | 270        | 280         | 290        | 300        |
| KTSNPFVLVAI | HDSEADYVTT | DNLSKVTEAV  | VATMPEGLTP | DLVQEACESE |
| 310         | 320        | 330         | 340        | 350        |
| LNEATGTkIA  | YETKVDLVQT | SEAIQESIYP  | TAQLCPSFEE | AEATPSPVLP |
| 360         | 370        | 380         | 390        | 400        |
| DIVMEAPLNS  | LLPSTGASVA | QPSASPLEVP  | SPVSyDGIKL | EPENPPPYYE |
| 410         | 420        | 430         | 440        | 450        |
| AMSVAlKtSD  | SKEEIKEPES | FNAAAQEAEA  | PYISIAcdLI | KETKLSTEPS |
| 460         | 470        | 480         | 490        | 500        |
| PEFSNYSEIA  | KFEKSVPDHC | ELVDDSSPES  | EPVDLFSDDS | IPEVPQTQEE |
| 510         | 520        | 530         | 540        | 550        |
| AVMLMkESLT  | EVSETVTQHK | HKERLSASPO  | EVGKPYLESF | QPNLHITKDA |
| 560         | 570        | 580         | 590        | 600        |
| ASNEIPTLTK  | KETISLQMEE | FNTAIYSNDD  | LLSSKEDKMK | ESETFSdSSP |
| 610         | 620        | 630         | 640        | 650        |
| IEIIDEfPTE  | VSAKDDSPKE | YTDLEVSNKS  | BIANVQSGAN | SLPCSELPCD |
| 660         | 670        | 680         | 690        | 700        |
| LSFKNTYPKD  | EAHVSDefSK | SRSSVSKVPL  | LLPNVSALES | QIEMGNIVKP |
| 710         | 720        | 730         | 740        | 750        |
| KVLTKEAEeK  | LPSDTEKEDR | SLTAVLSAEL  | NKTSARAETH | LRRGSGSK   |
| 760         | 770        | 780         | 790        | 798        |

### B. Protein sequence of linear counterpart mRNA expressed by pCMV-Rtn4-Exon2-Exon3.

The contributions of exon 3 are highlighted in green. The amino acid sequence from the vector is in gray.

### C.

13 ↓

AUGAGACCCUUU UUGCUCUuccUG CUGCAUCUGAGC CUGUGAUACCCU CCUCUGCAGAAA 60  
 E T L F A L P A A S E P V I P S S A E K

→

AAAUUAUGGAUU UGAAGGAGCAGC CAGGUAAACACUG UUUCGUCUGGUC AAGAGGAUUUCC 120  
 I M D L K E Q P G N T V S S G Q E D F P..

CAUCUGUCCUGU UGA AACUGCUG CCUCUCUuccUU CUCUAUCUCCUC UCUCAACUGUUU 180

CUUUUAAAGAAC ACGGAUACCUUG GUAA CUUAUCAG CAGUGGCAUCCA CAGAAGGAACUA 240

15

UUGAAGAAACUU UAAAUGAAGCUU CUAGAGAAUUGC CAGAGAGGGCAA CAAAUCCAuuUG 300

→

UAAAUAGAGAGU CAGCAGAGUUUU CAGUAUUAAGAAU ACUCAGAA AUG GAUCAUCUUUCA  
 10

→

AUGGCUCCCAA AAGGAGAGUCAG CC AUGUAGUAG AAAACACUAAGG AAGAAGUAAUUG

UGAGGAGUAAAG ACAAAGAGGAUU UAGUUUGUAGUG CAGCCCUUCAUA AUCCACAAGAGU

CACCUGCGACCC UUACUAAAGUGG UJAAAGAAGACG GAGUU<sup>→</sup>AUGUCUC CAGAAAAGACAA<sup>→</sup>  
 UG<sup>2</sup>GACAUUUUUA AUGAAUGAAA UGUCAGUGGJAG CACCUGUGAGGG AAGAGUAUGCAG 600  
 AUUUUAAGCCAU UUGACAAGCAU<sup>6</sup>GGGAAGUGAAAG AUACUU<sup>51</sup>AUGAGG GAAGUAGGGAUG<sup>46</sup>  
 UGCUGGCUGCUA GAGCUAAU<sup>→</sup>AUGG AAAGUAAAGUGG ACAAAAAAUGCU UUGAAGAUGCC<sup>2</sup>  
 UGGAGCAAAAAa GUC<sup>20</sup>AUGGGAAGG AUJAGUGAAAGCA GAA<sup>12</sup>AUGAGAUG<sup>10</sup> CUUCUUUCCCA  
 GUACCCAGAAC UUGUGAAGGACG GCUCCAGAGCGU ACAUCACCUGUG AUUCCUUUA<sup>c</sup>CU  
 CAGCAACCGAGA GUACUGCAGCAA ACAUUUCCUG UGC<sup>4</sup>UAGAAGAUC ACACUUCAGAAA 900  
 AUAAAACAGA<sup>4</sup>AUG AAAAAAAAAA<sup>→</sup>JAG AAGAAAGGAAG CCCAAAUUA<sup>14</sup>UAA CAGAGAAGACUA<sup>9</sup>  
 GCCCAAACGU CAAUCCUUUCC UUGUAGCAAUAC AUGAUUCCGAGG CAGAUUAUGUCA  
 CAACAGA<sup>14</sup>UAAUU UAUCAAGGUGA CUGAGGCAGUAG UGGCAACC<sup>→</sup>AUGC CUGAAGGUCUAA  
 CGCCAGAUU<sup>46</sup>UAG UUCAGGAAGCAU<sup>14</sup>GUGAAAGUGAAC UGAACGAAGCCA CAGGUACAAAGA  
 UUGCUUAUGAAA CAAAAGUGGACU UGGUCCAGACAU CAGAAGCUAUAC AAGAGUCAUUU 1200  
 ACCCCACAGCAC AGCUUUGCCCAU CAUU<sup>→</sup>UGAGGAAG CUGAAGCAACUC CGUCACCAGUUU  
 UGCCUGAUAUUG UUAUGGAAGCUC CAUUAAAUUCUC UCCUCCAAGCA CUGGUGCUUCUG  
 UAGCGCAGCCCA GUGCAUCCCCAC UAGAAGUACCGU CUCCAGU<sup>3</sup>UAGUU AUGACGGUAUAA  
 AGCUUGAGGCCUG AAAAUCCCCAC CAUAUGAAGAAG CCAUGAGUGUAG CACUAAAACAU<sup>→</sup>  
 CGGACgCAAAGG AAGAAU<sup>17</sup>UAAAG AGCCUGAAAGUU UJAAUGCAGCUG UUCAGGAAGCAG 1500  
 AAGCUCCUUAUA UAUCCAUUGC<sup>1</sup>AUGUGAUUJAAUUA AAGAAACAAAGC UCUCCACUGAGC  
 CAAGUCCAGAGU UCUC<sup>28</sup>UAAUUAUU CAGAAA<sup>14</sup>UAGCAA AAUUUGAGAAGU CGGUGCCUGAUC  
 ACUGUGAGCUCG UGGAUGAUUCCU CACCgGAAUCUG AACCAGUUGACU UAUU<sup>14</sup>UAGUGAUG  
 AUUCAAUUCCUG AcGUCCACAAA CACAAGAGGAGG CUG<sup>→</sup>UGAUGCUAA<sup>→</sup>UGAAGGAGAGUC  
 UCACUGAAGUGU CUGAGACAGUAA CACAACACAAAC AUAAAGGAGAGAC UUAGUGCUUCAC 1800  
 CUCAGGAGGUG GAAAGCCAUAAU UAGAGUCUUUUC AGCCCAUUUAC AUUUUACAAAAG  
 AUGCUGCAUCUA AUGAAAUCCAA CAUUGA<sup>8</sup>CCAAA AGGAGACAAUUU CUUUGCAA<sup>→</sup>AUGG  
 AAGAGUU<sup>11</sup>UAAUA CUGCAAUUUAUU CCAUGAUGACU UACUUUCUUCUA AGGAAGACAAA<sup>→</sup>  
 19

```

UGA AAGAAAGUG AAACAUUUUCCG AUUCAUCUCCCA UUGAGA UAAUAG AUGAGUUUCCCA
          9
CAUUUGUCAGUG C UAAAG AUGAUU CUCC U AAGGAGU ACAC UGACC UAG AAGUAUCCAACA 2100
          58
AAAGUGA AAUUG C U A AUGUCCAGA GCGGGGCCAAUU CGUUGCCUUGCU CAGAAUUGCCCU
          32          29          26
GUGACC UUUCUU UCAAGAAUACAU AUCC U A A GAUG AAGCACA AUGUCU CAG AUGA AUUCU
          8
CCAAAAG UAGGU CCAGUGUAUC U A A GGUGCCCUU AU UGCUUCCAA AUG UUUCUGCUUUGG
          →
AAUCUCAAA UAG AA AUGGGCAACA UAG U A A ACCCA AAGUACUUACGA AAGAAGCAGAGG

AAAAACUUCUU CUGA UACAGAGA AAGAGGACAGAU CCC UGA CAGCUG UAUUGUCAGCAG 2400
  K L P S D T E K E D R S L T A V L S A E
AGC UGA A U A A A CUUCAG 2418
  L N K T S [D]

```

### C. Nucleotide sequence of circRtn4.

The nucleotides contributed by exon 2 are shown in blue and those from exon 3 in black lettering; the junction is depicted by a vertical arrow. Due to the circular nature of the RNA, the nucleotide at position 2418 is fused to nucleotide 1. If this circular RNA is translated, it generates a GAU codon (highlighted in yellow) coding for aspartic acid, denoted by a [D]. All possible AUG start codons are shown in green and stop codons in red. Where start and stop codons overlap, only the non-overlapping parts of stop codons are red. The numbers above AUG codons indicates the amino acid lengths of hypothetical reading frames, while the 16 AUG codons marked by horizontal arrows are hypothetically proceeding uninterrupted by any stop codon, thus circling the RNA template. Circumstantial evidence points to a start at the second AUG marked by a green arrow. Part of the amino acid sequence of the open reading frame is shown in the one-letter code beneath the nucleic acid sequence. Nucleotides are arranged in blocks of 12.

### D.

#### Frame 3

```

ETL FALPAASEPVIPSSAEKI MDLKEQPGNTVSSGQEDFPSVLFETAASLPSLSPLSTV SFKEHG YLGN
LSAVASTE GTIEETLNEASRELPERATNPFVNRESAEFSVLEYSEM GSSFN GSPKGESAM LVENTKEEV
IVRSKDKEDLVCSAALHNPOES PATLTKVVKEDGVM SPEKTM DIFNEMKMSV VAPVREEYADFKPFEQA
WEVKD TYEGSRDVL AARANMESKV DKKCFEDSLEQKSHGKDSESRNENASFPSTPELVKDGSRAYITCD
SFTSATESTAA NIFPVLEDHTSENKTDEKKIEERKAQII TEKTS PKTSNPFLVAIHDSEADYVTTDNLS
KVTEAVVATM PEGLTPDLVQEACESELNEATGTKIAYETKVDLVQ TSEAIQESIYPTAQLCPSFEEAEA
TPSPVLPDIVMEAPLNSLLPSTGASVAQPSASPLEVPSVSYDGIKLEPENPPP YEEAMSVALKTS DAK
EEIKEPESFNAAVQEA EAPYIS IACDLIKETKLSTEPSPEFSNYSEIAKFEKSVPDHCELVDDSSPESE
PVDLFSDD SIPDVPQTQEEAVMLM KESL TEVSETVTQHKKERLSASPQEVGKPYLESFQPNLHITKDA
ASNEIPTLTKKETISLQMEEFNTAIYSNDDLSSKEDKM KESETFSDSSPIEIID EFPFTFVSAKDDSPK
EYTDLEVSNKSEIANVQSGANSLPCSELPCDLSFKNTYPKDEAHVSDEF SKSRSSVSKVPLLLPNVSAL
ESQIEMGNIVKPKVLTKEAEKLP SDTEKEDRSLTAVLSAELNKTS

```

#### Frame 2

```

-DPFCSSCCI-ACDTLLCRKNYGFEGAAR-HCFVWSRGFPICPV-NCCLSSFSISSLNCFF-RTRIPW-
LISSGIHRRNY-RNFK-SF-RIAREGNKSICK-RVSRVFSIRILRNGIIFQWLPKRRVSHVSRKH-

```

GRSNCEE-RQRGFSL-CSPS-STRVTCDPY-SG-RRRSYVSRKDNHGF--NENVSGSTCEGRVCRF-  
AI-TSMGSELYL-GK-GCAGC-S-YGK-SGQKML-R-PGAKKSWEG--KQK-  
ECFFPQYPRTEGRLQSVHHL-FLYLSNREYCSKHFPKARRSHFRK-NR-KKNRRKEGPNYNRED-  
PQNVKSFPCSNL-FRGRLLCHNR-FIKGD-GSSGNHA-RSNARFSSGSM-K-TERSRYKDCL-  
NKSGLGPDIRSITRVNLPSTALPII-GS-SNSVTSFA-  
YCYGSSIKFSPSKHWCFCSAQAQCIPTTRSTVSS-L-RYKA-A-KSPTI-RSHECSTKNIGRKGGRN-RA-  
KF-CSCSGSRSSLYIHC-M-FN-RNKALH-AKSRVL-LFRNSKI-EVGA-SL-ARG-FLTGI-TS-LI--  
-FNS-RPTNTRGGCDANEGESH-SV-DSNTTQT-GET-CFTSGGRKAI FRVFSQAQFTYYKRCCI--  
NSNIDQKGDNFFANGRV-YCNLFQ--LTFE-GRQNERK-NIFRFISH-DNR-VSHICQC-R-FS-GVH-  
PRSIQOK-NC-CPERGQFVALLRIAL-PFFQEQEYIS-R-STCLR-ILQK-VQCI-  
GALIASKCFCFGISNRNGQHS-TQSTYERSRGKTSF-YRERGOIPDSCIVSRAE-NF

Frame 1

MRPFLLELLHLSL-YPPLQKKLWI-  
RSSQVTLFRLVKRISHLSCLKLLPLFLLYLLSOLFLLKNTDTLVTYQQWHPQKELLKKL-  
MKLLENCQRGQQIHL-IESQQSFQY-NTQKWDHLSMAPQKESQPC--KTLRKK-L-GVKTKRI-  
FVVQPFIIHKSHLRPLLKWLKKTTELCLQKRQWTFMK-KCQW-HL-GKSMQILSHLNKHGK-  
KILMREVGMCWLELEIWKVKWTKNALKIAWSKKVMGRIVKAEMRMLLSPVPQNL-  
RTAPERTSPVIPLPQQPRVLQQTFSLC-KITLQKIKQMKKK-KKGRPKL-QRRLAPKRQILSL-  
QYMI PRQIM SQQIIYQR-LRQ-WQPCLKV-RQI-FRKHVKVN-  
TKPQVQRLLMKQKWTWSRHQKLYKSQFTPOHSFAHHLRKLKQLRHQFCLILLWKLH-ILSFQALVLL-  
RSPVHPH-KYRLQLVMTV-SLSLKIPHHMKKP-V-H-  
KHRTQRKKLKS LKVLMLQFRKQKLLIYPLHVI-LKKQSSPLSQVQSSLI IQK-  
QNLRSRCLITVSSWMI PHRNLNQLTYLVMIQFLTSHKHKRRL-C--RRVSLKCLRQ-  
HNTNIRDLVHLRR-ESHI-SLFSPIYILQKMLHLMKFQH-  
PKRRQFLCKWKS LILQFIPMMTYFLLRKT-KKVKHFPIHLPLR--MSFPHLSVLKMI LLRSTLT-  
KYPTKVKLLMSRAGPIRCLAQNCPVTFLSRIHILKMKHMSQMNSPKVGVPYLRCPCYCFQMFLLWNLK-  
KWAT-LNPKYL RKKQRKNFLLIQRKRTDP-QLYCOQS- IKLQ

#### D. circRtn4 computationally translated in all three reading frames.

Only frame 3 is open. Methionine residues are highlighted in green and longer potential ORFs in other reading frames of hypothetical polypeptides are highlighted in blue.

### A. circRtn4-FLAG-Stop

```
AUGAGACCCUUU UUGCUCUCCUG CUGCAUCUGAGC CUGUGAUACCCg actacaaggacg 60
..E T L F A L P A A S E P V I P D Y K D D

acgatgacaagc caccgtgaUCCU CUGCAGAAAAAA UUAUGGAUUUGA AGGAGCAGCCAG 120
D D K P P - M D L K E Q P G...
```

### B. circRtn4-FLAG-ac

```
AUGAGACCCUUU UUGCUCUCCUG CUGCAUCUGAGC CUGUGAUACCCg actacaaggacg 60
E T L F A L P A A S E P V I P D Y K D D

acgatgacaagc caccgacUCCUC UGCAGAAAAAAU UAUGGAUUUGcA GGAGCAGCCAGG 120
D D K P P T P L Q K K L W I C R S S Q V
M D L Q E Q P G

UAACACUGUUUC GUCUGGUCAAGA GGAUUUCCCAUC UGUCCUGUUUGA AACUGCUGCCUC 180
T L F R L V K R I S H L S C L K L L P L
N T V S S G Q E D F P S V L F E T A A S
UCUCCUUCUCU AUCUCCUCUCUC AACUGUUUCUUU UAAAGAACACGG AUACCUUGGUAA 240
F L L Y L L S Q L F L L K N T D T L V T
L P S L S P L S T V S F K E H G Y L G N
CUUAUCAGCAGU GGCAUCCACAGA AGGAACUAUUGA AGAAACUUUAAA UGAAGCUUCUAG 300
Y Q Q W H P Q K E L L K K L -
L S A V A S T E G T I E E T L N E A S ... etc.
```

### Supplementary Fig. 2

**Additional constructs circRtn4-Stop (A) and circRtn4\_FLAG-ac (B).** Blue lettering indicates nucleotide sequence contributions of *Rtn4* exon 2 and black upper-case lettering contributions of *Rtn4* exon 3. Nucleotides are arranged in blocks of 12. The nucleotides for the FLAG sequence are in black lower-case letters. The corresponding amino acids are depicted in bold and purple (IUPAC one-letter amino acid code). The putative start codon in green. A) A translation stop codon was introduced after the sequence encoding the FLAG peptide, presumably after almost a full circle of translation (indicated in red). The predicted Rtn4 polypeptide variant (IUPAC one-letter amino acid code) is ~800 amino acids in length. B) The insertion of two nucleotides (ac) at positions 78/79 and a single nucleotide exchange at position 107 (c) are shown in lower case letters highlighted in blue. The correspondingly changed amino acid Q at position 4 (highlighted in blue) of the assumed Rtn4-derived amino acid sequence is also highlighted in blue. The latter was changed in order to remove a stop codon early in the second round of translation. The predicted polypeptide sequence is given in the IUPAC one-letter amino acid code. Translation product for the first round on the circle is shown in the second aa sequence row. Translation could theoretically proceed for about another ~69 amino acid into a next round of translation, provided that AUG start codon 98-100 is being used for translation initiation. The amino acid sequence of the second round of translation would leave the reading frame after the FLAG peptide at the glutamine

residue and proceed (top amino acid sequence immediately under the nucleotide sequence) until the stop codon at position 285-287 (red) is encountered. The predicted protein would be ~869 amino acids in length.



**Supplementary Fig. 3**

**16 mass spectra of the tryptic peptides from circRtn4 derived protein**

The left coordinate is the relative intensity, the right coordinate is the absolute intensity, the horizontal coordinate is m/z.

Scan 16346 Method FTMS; HCD Score 144.1 m/z 632.28

Supplementary Fig. 3  
1 of 16 peptide mass spectra

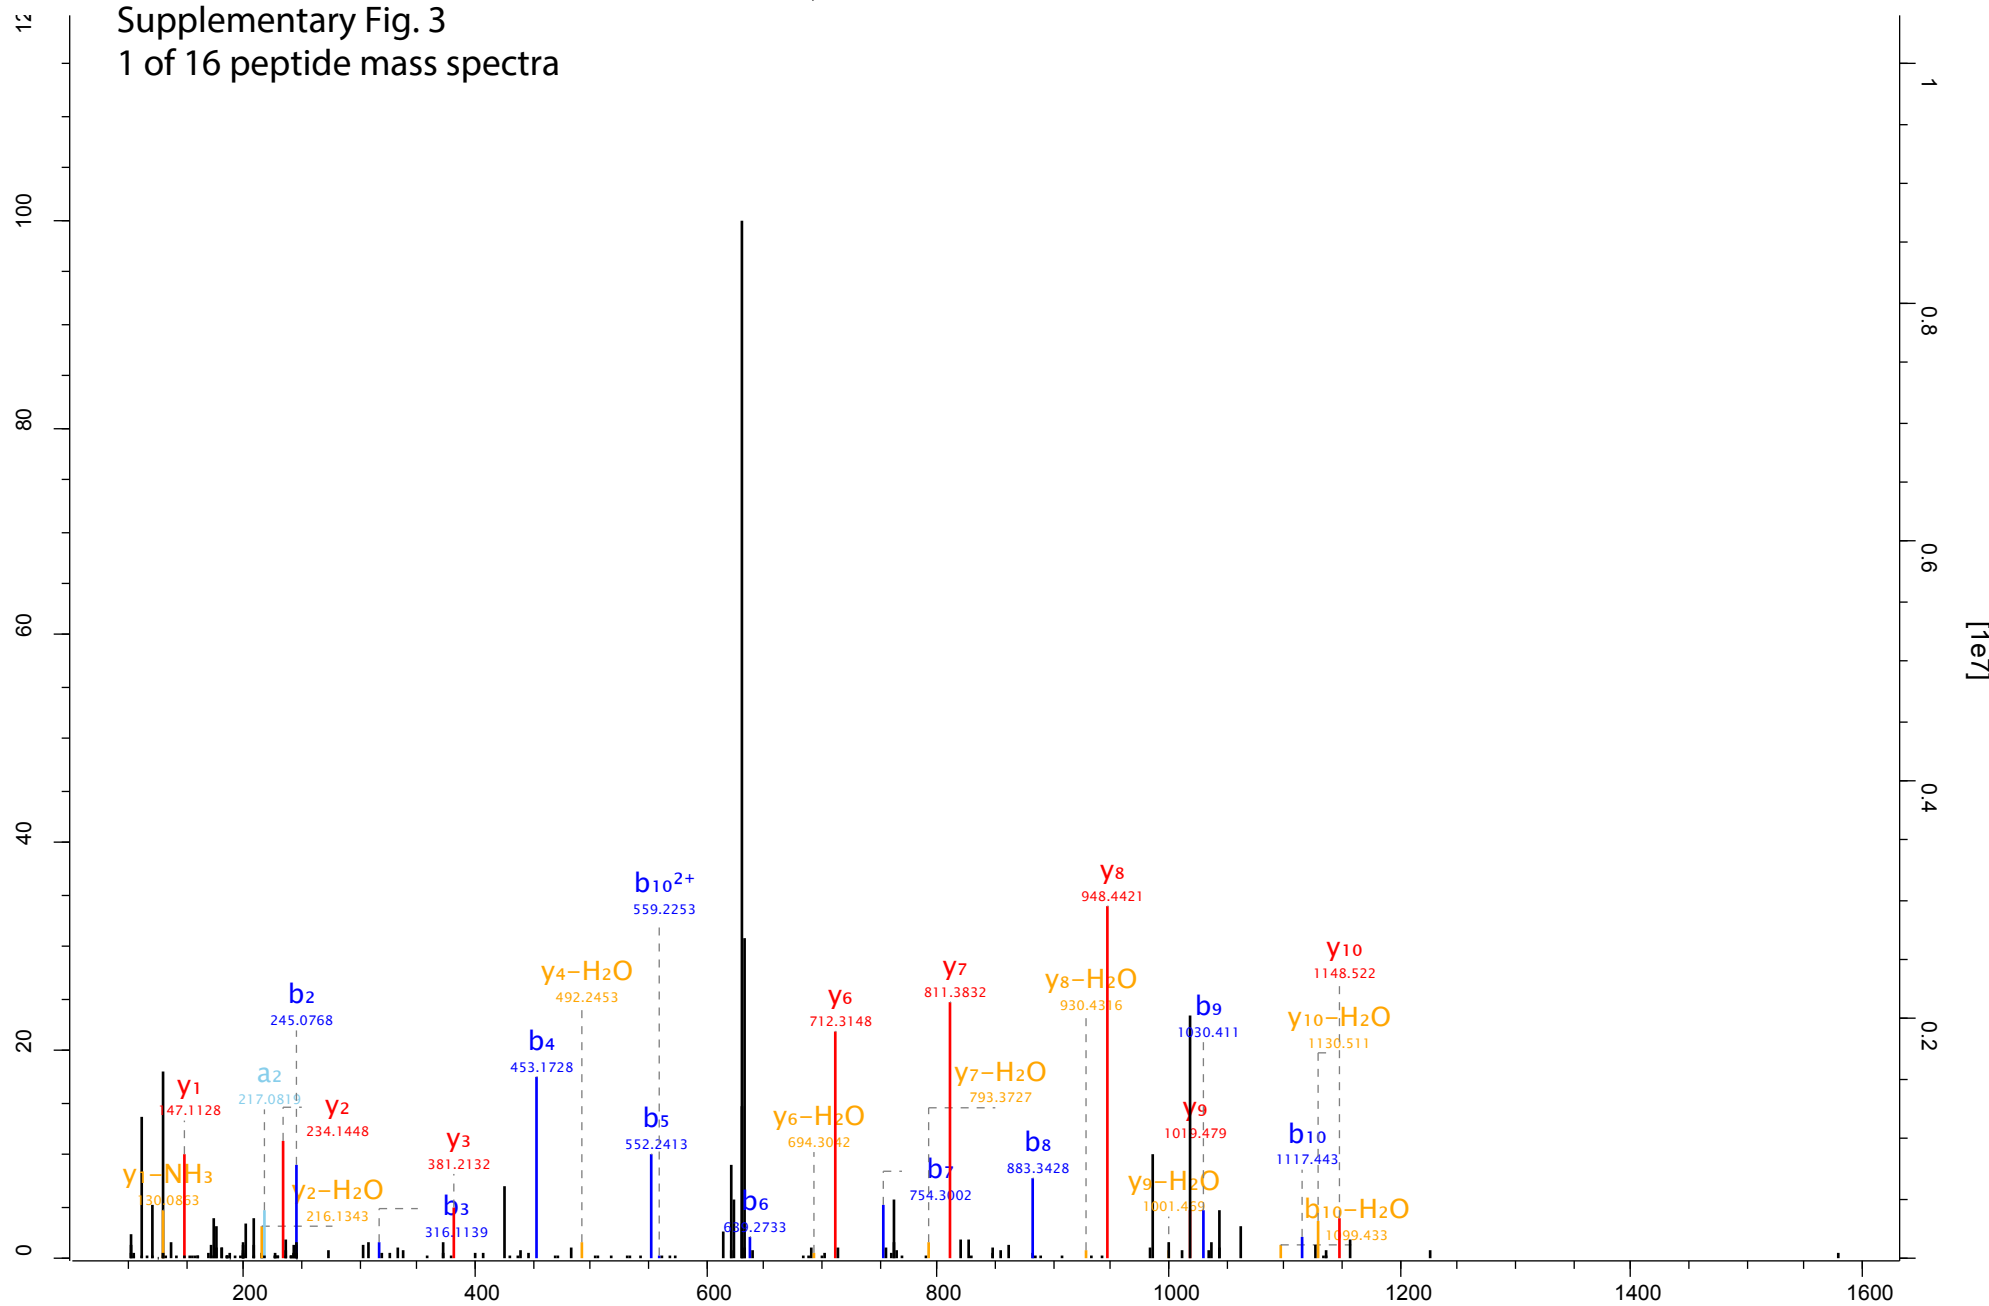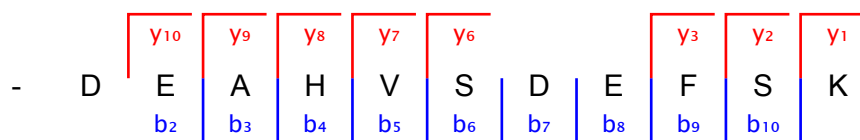

Supplementary Fig. 3  
2 of 16 peptide mass spectra

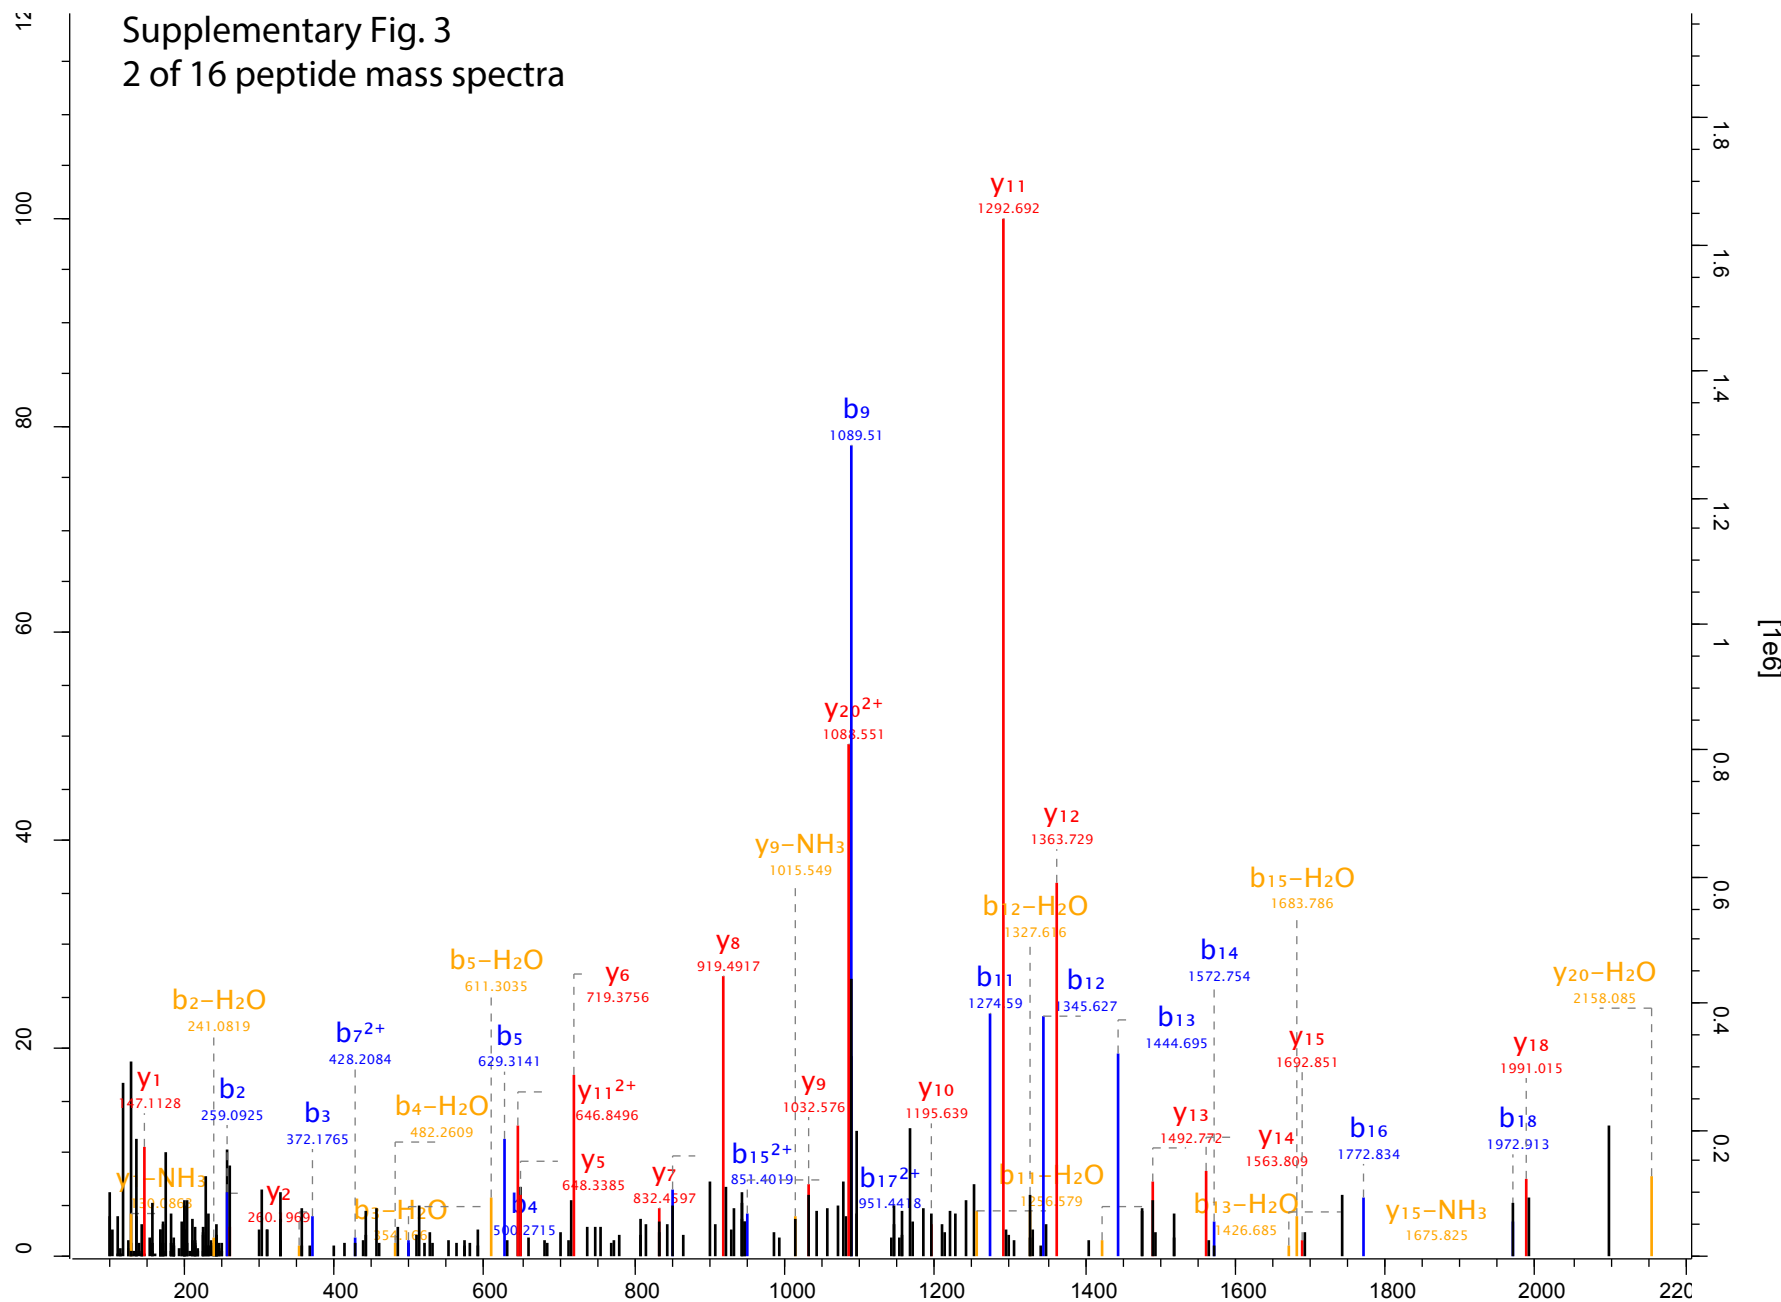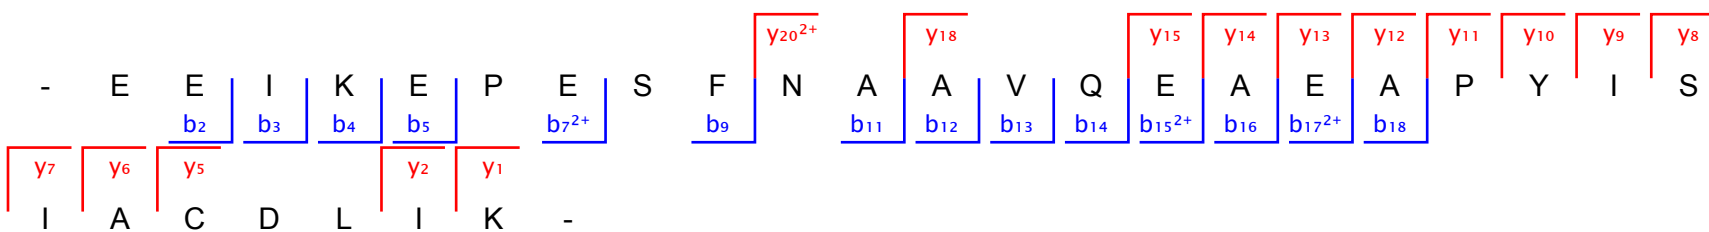

Scan 88482 Method FTMS; HCD Score 62.81 m/z 672.99

Supplementary Fig. 3  
3 of 16 peptide mass spectra

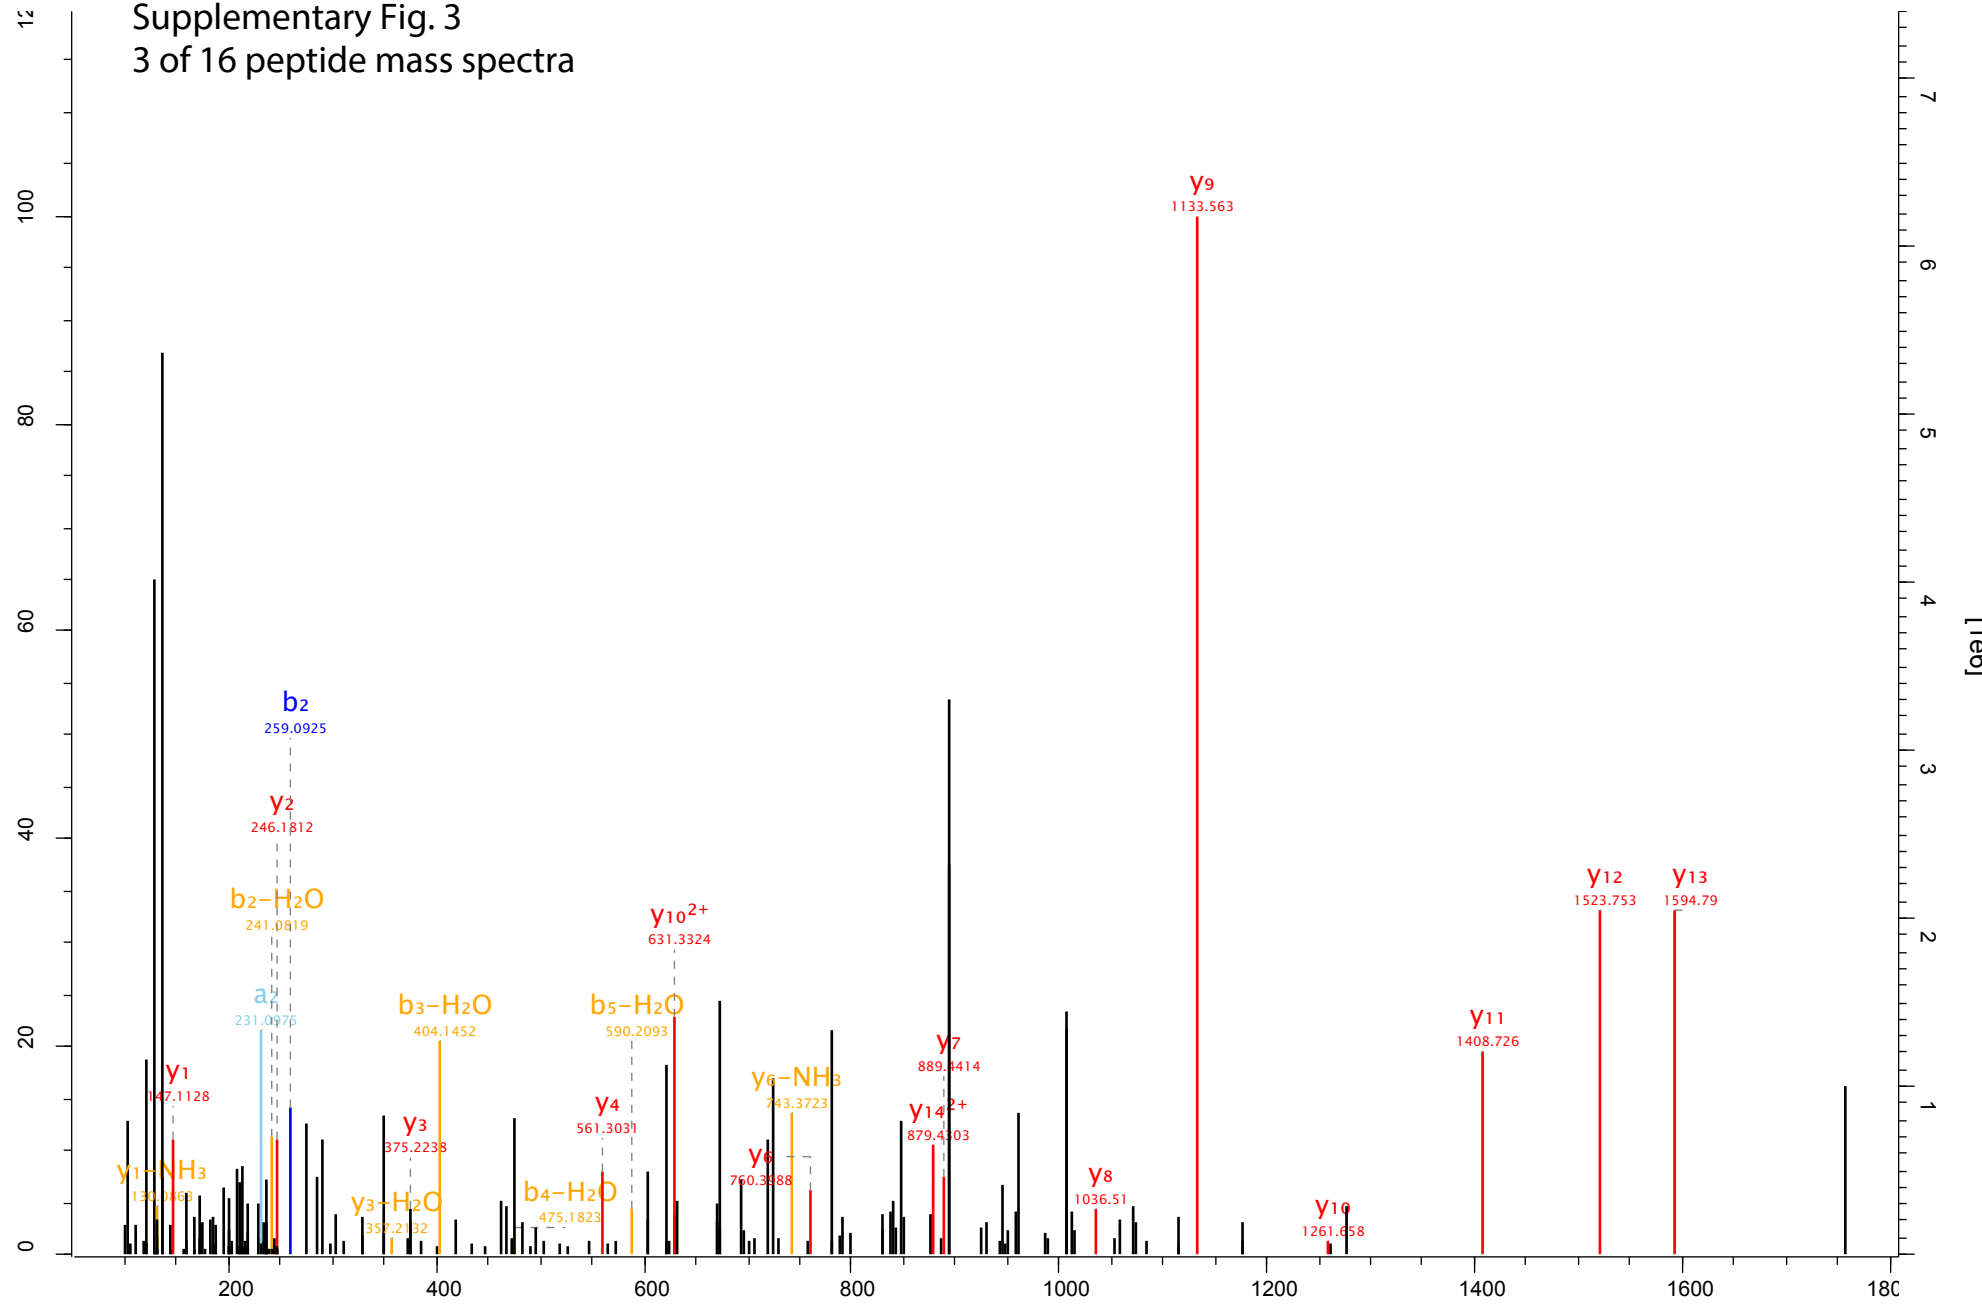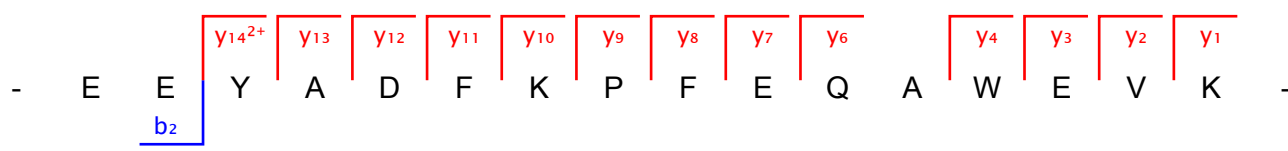

Scan 102956 Method FTMS; HCD Score 53.9 m/z 950.46

Supplementary Fig. 3  
4 of 16 peptide mass spectra

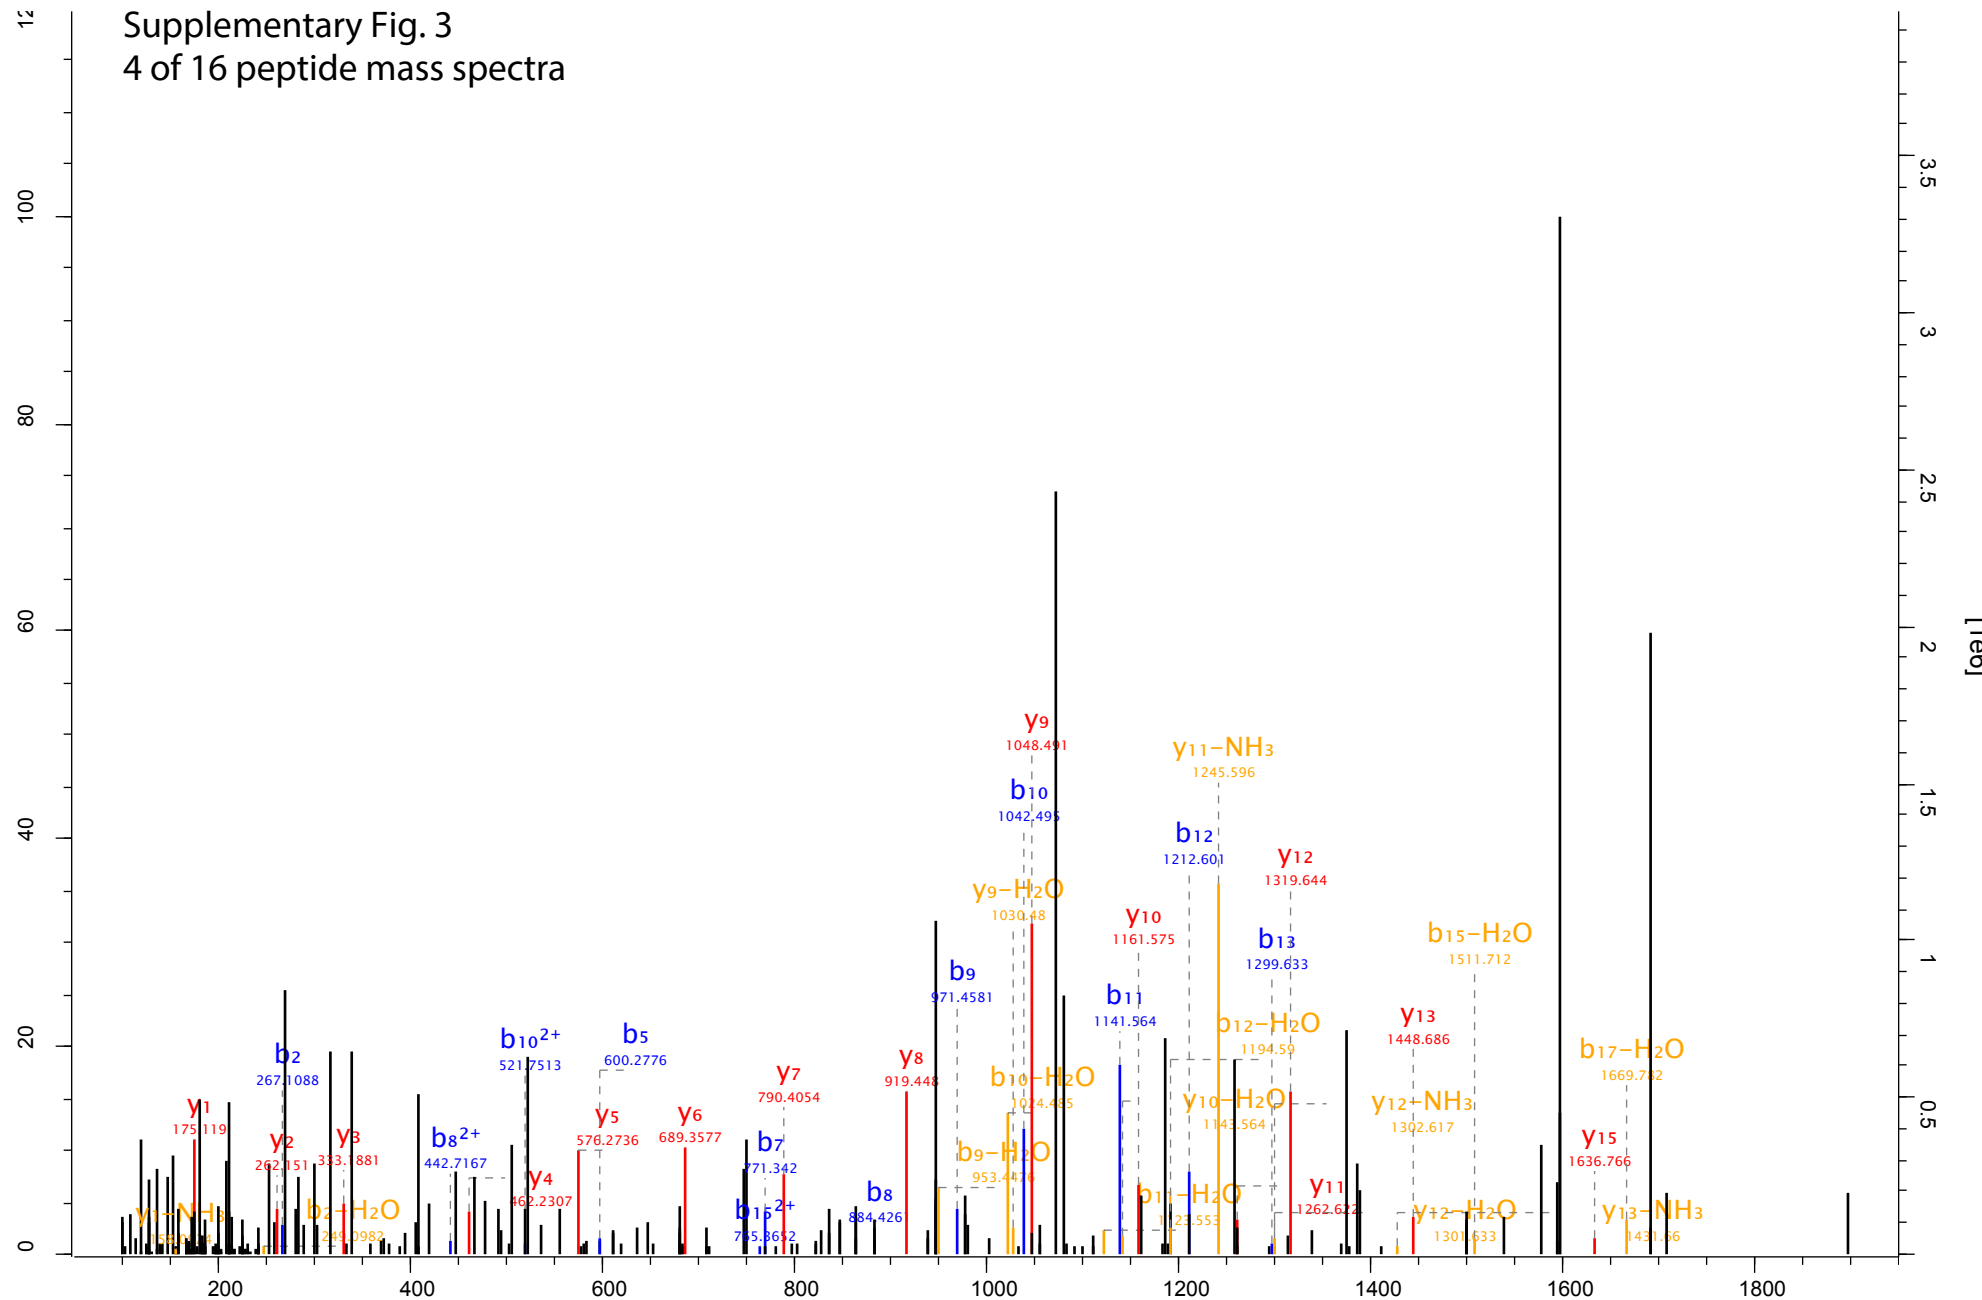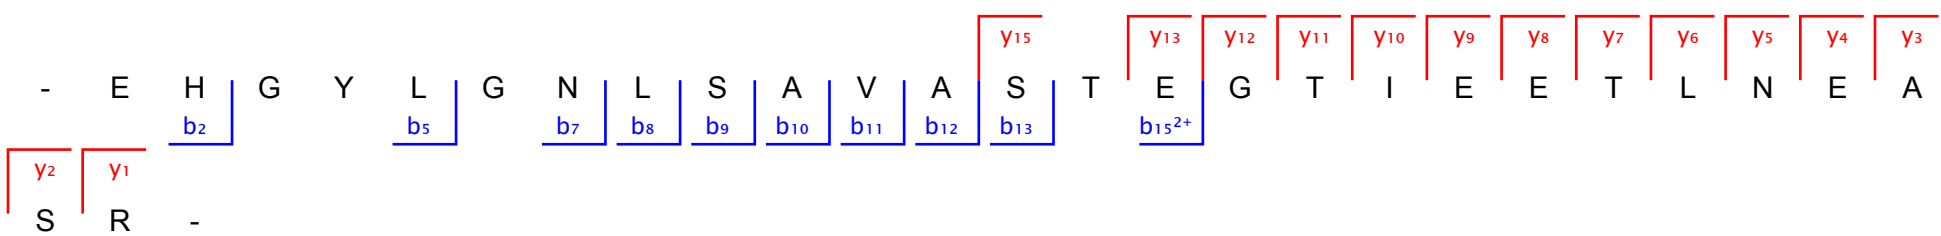

Scan 114435 Method FTMS; HCD Score 80.69 m/z 1286.31

Supplementary Fig. 3  
5 of 16 peptide mass spectra

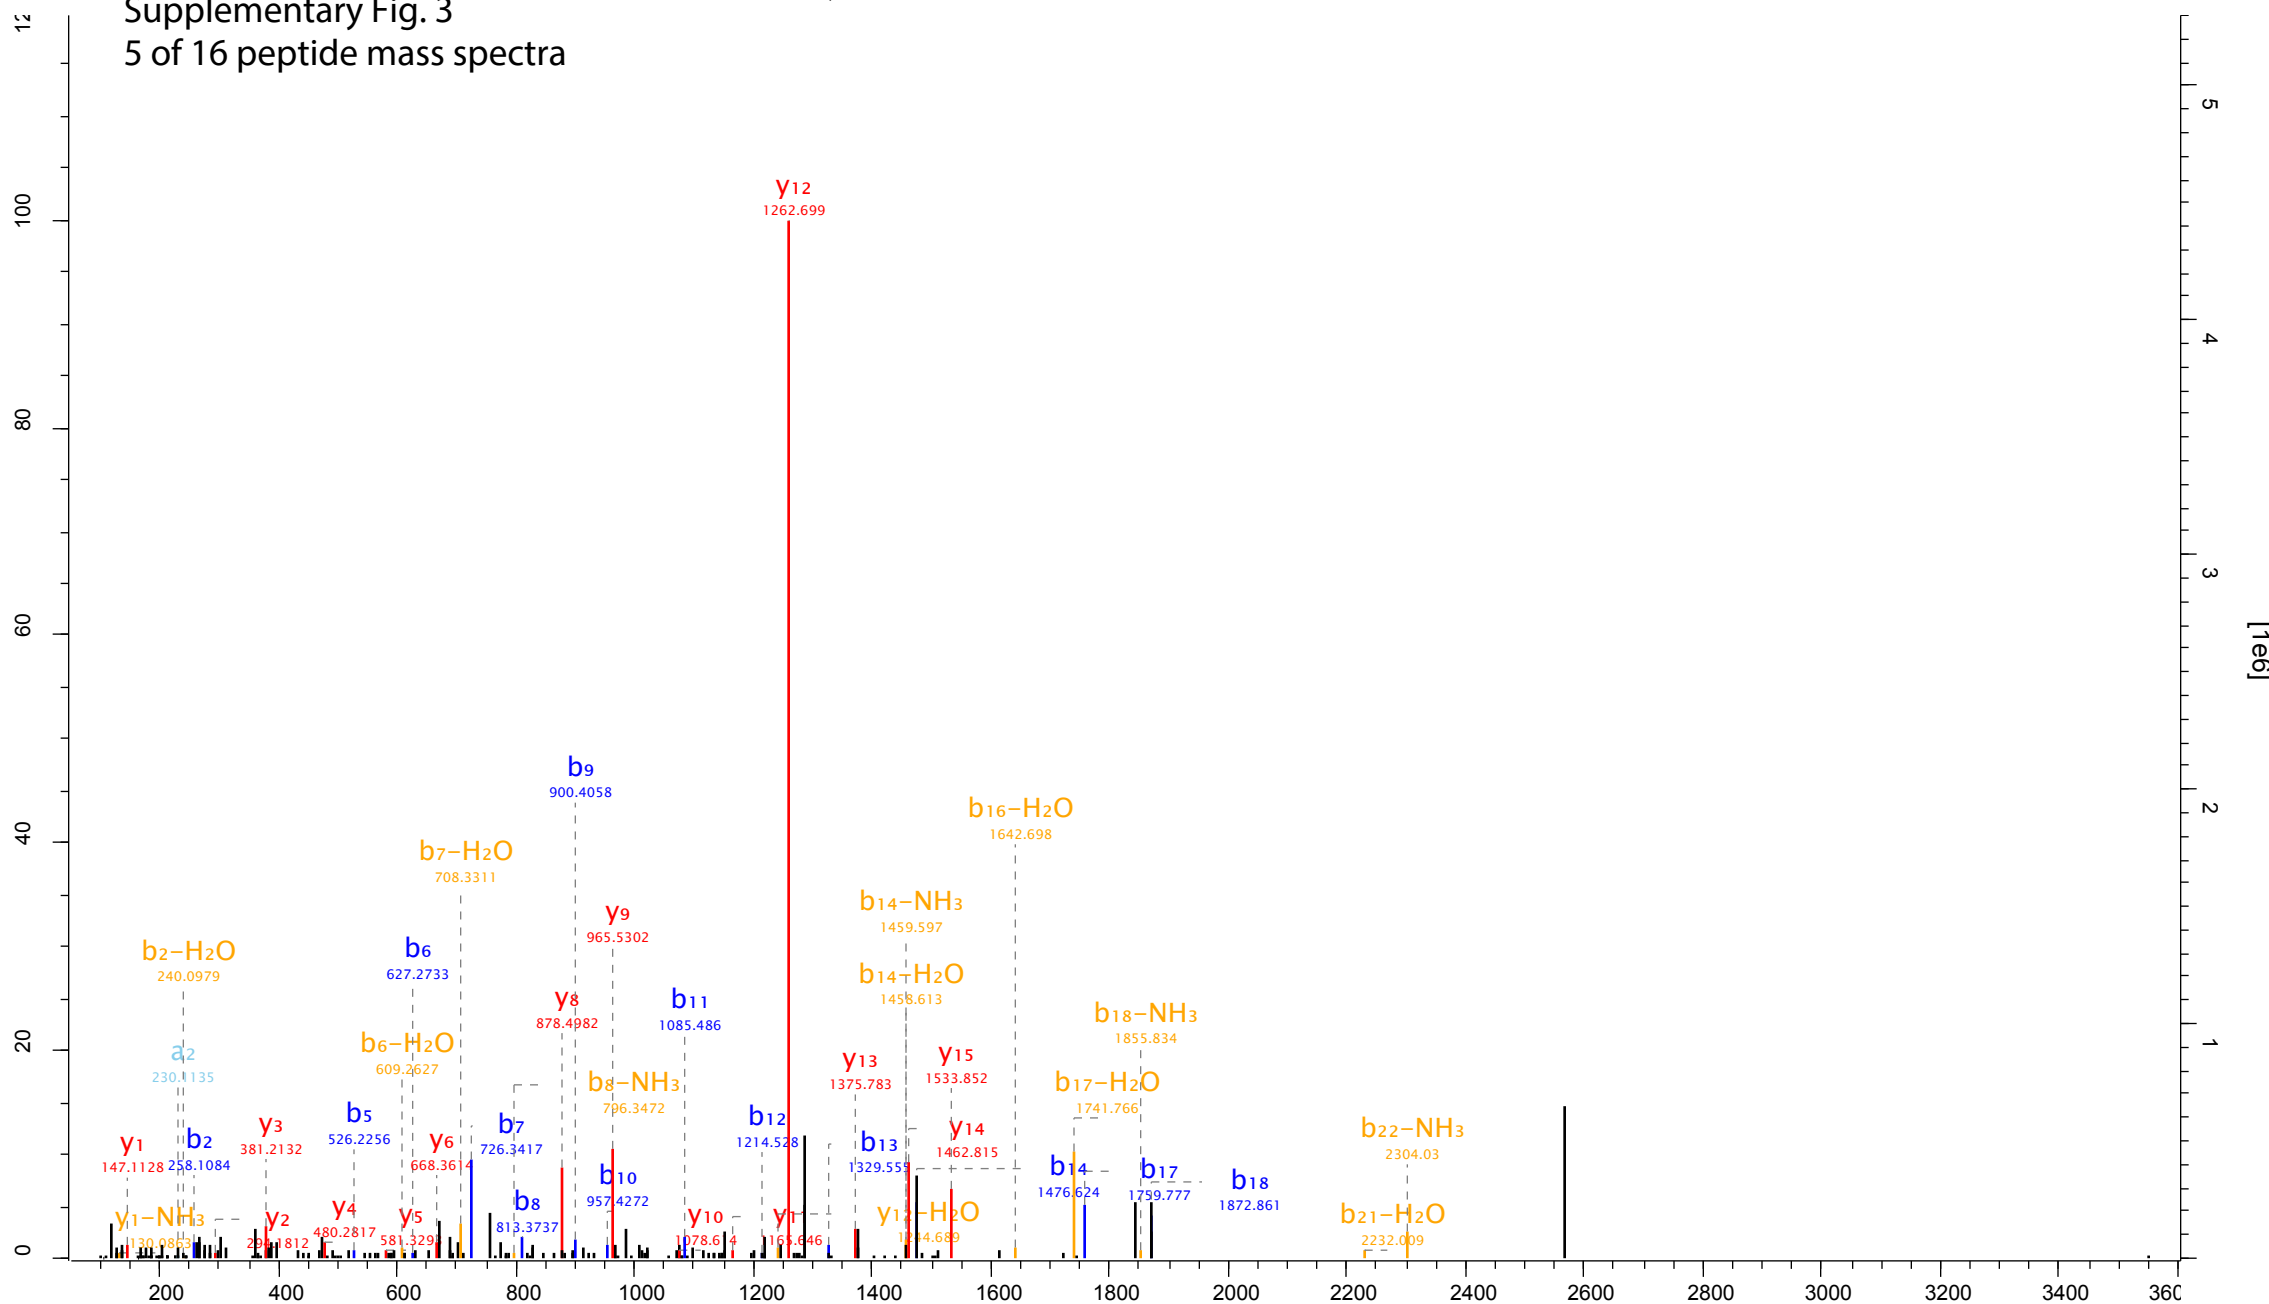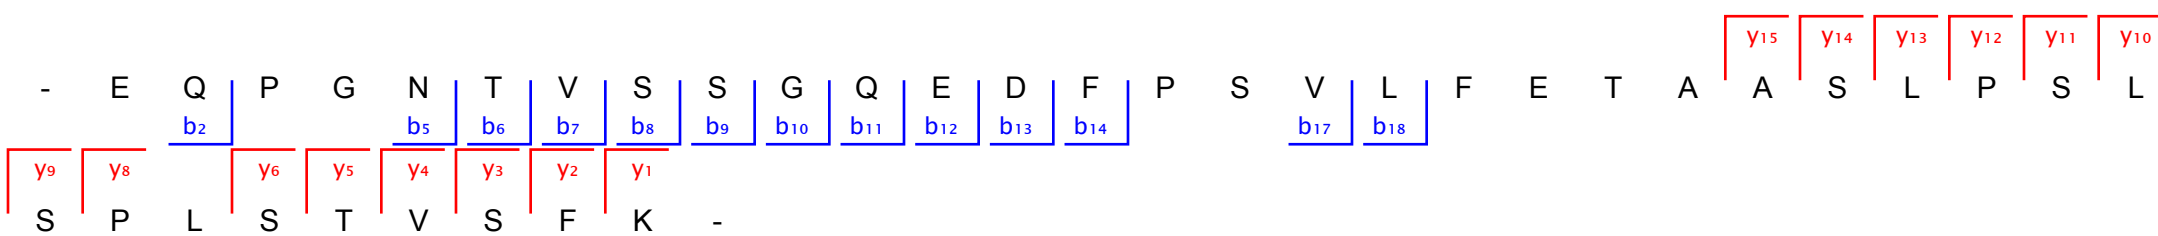

Scan 40472 Method FTMS; HCD Score 69.26 m/z 529.93

Supplementary Fig. 3  
6 of 16 peptide mass spectra

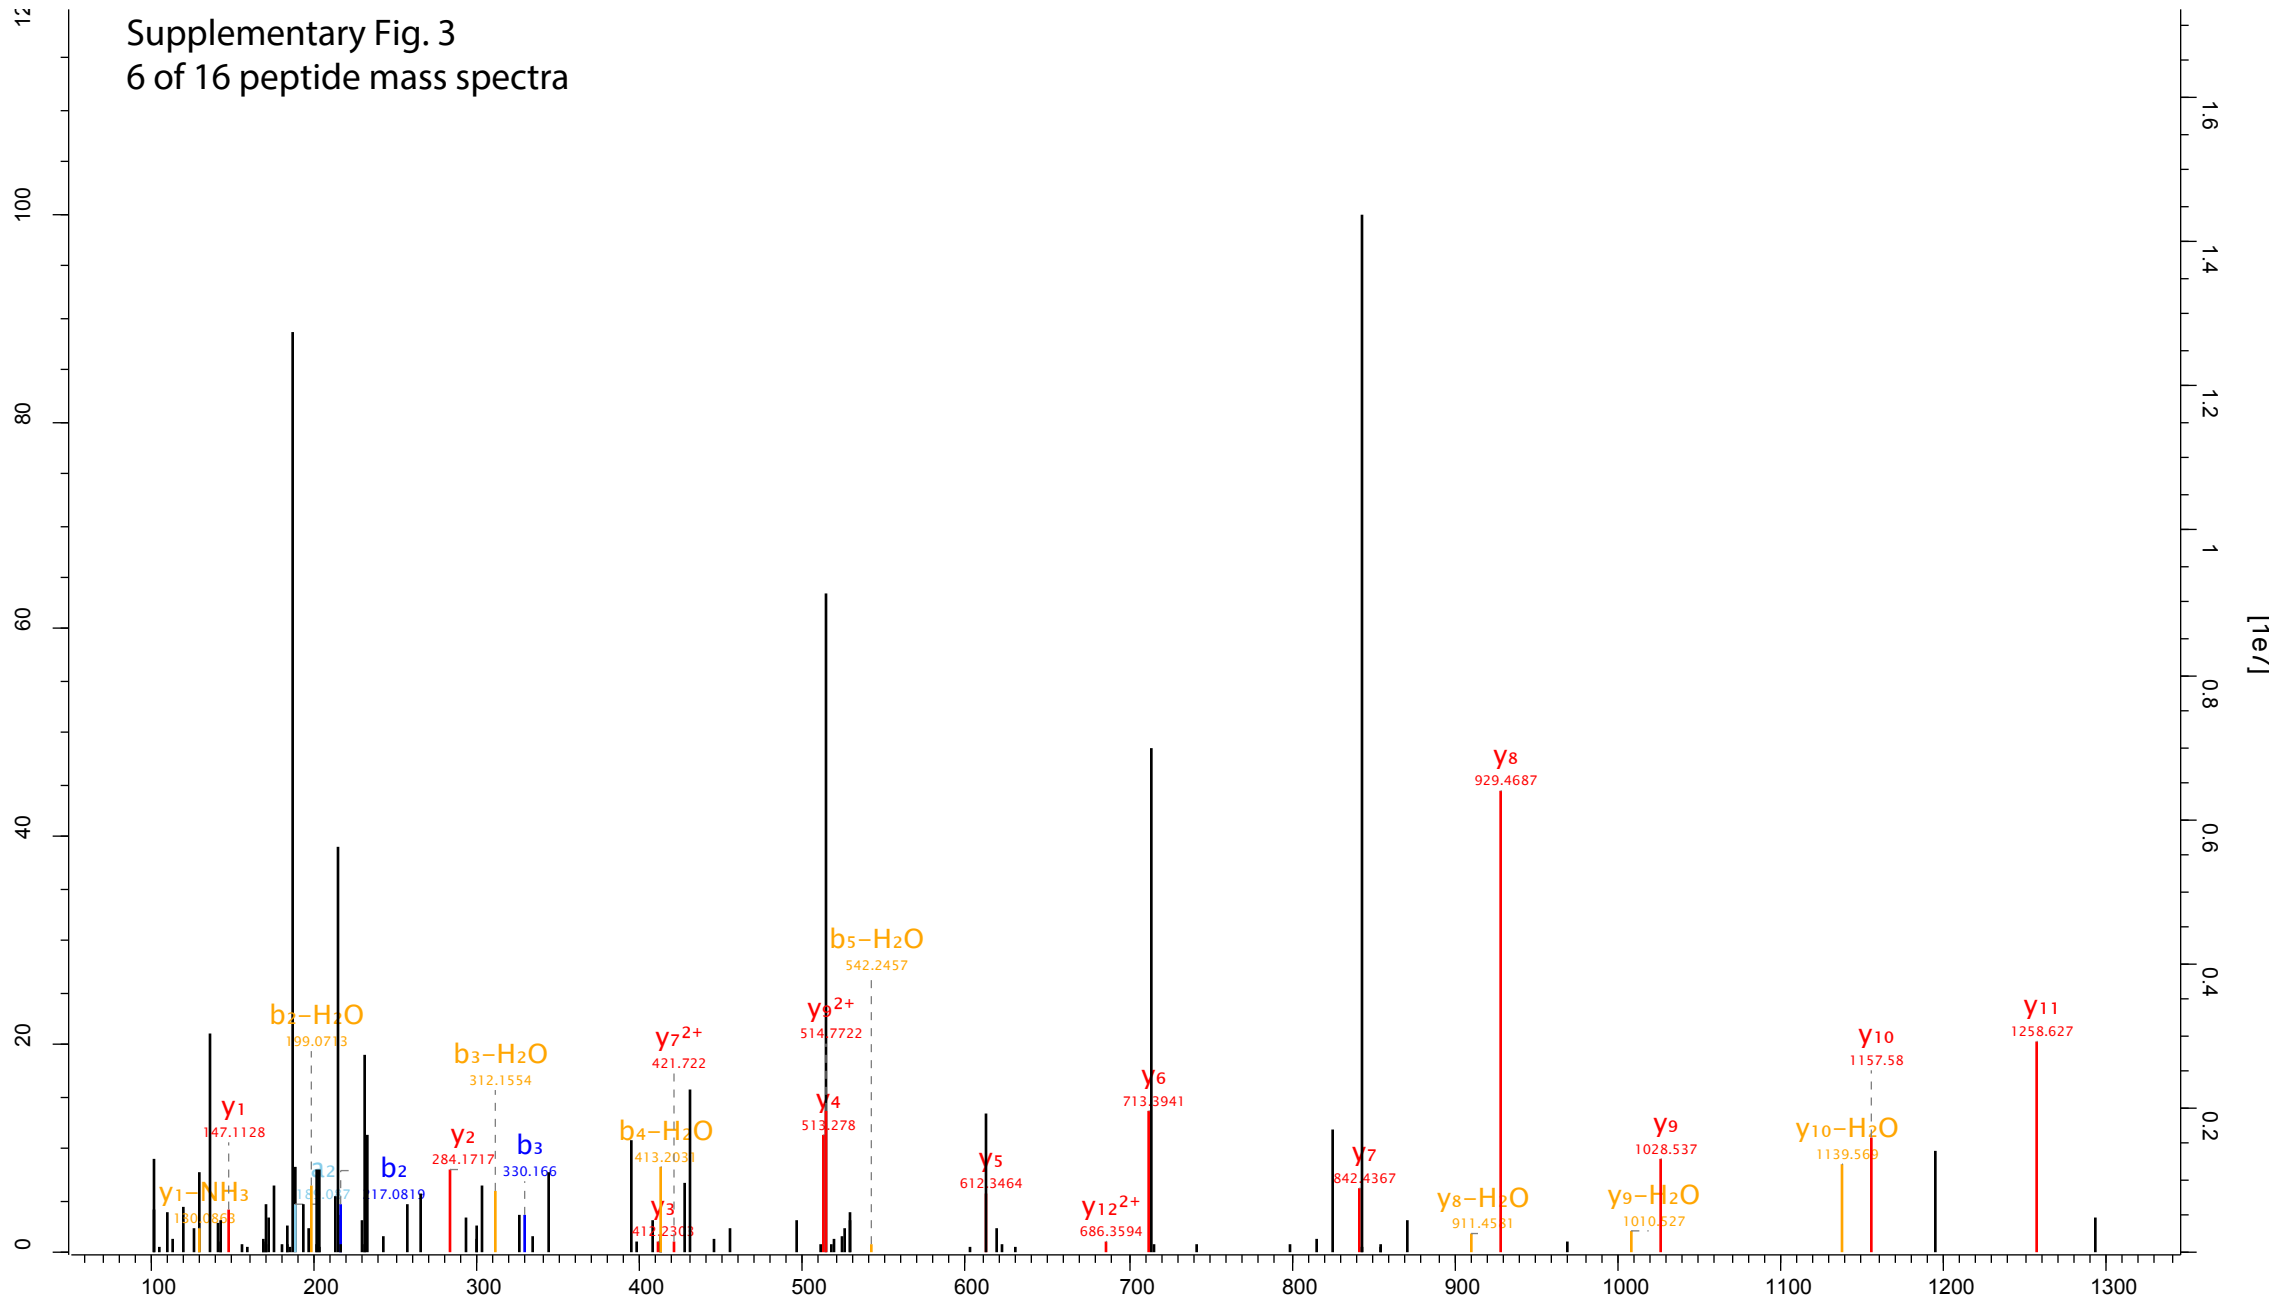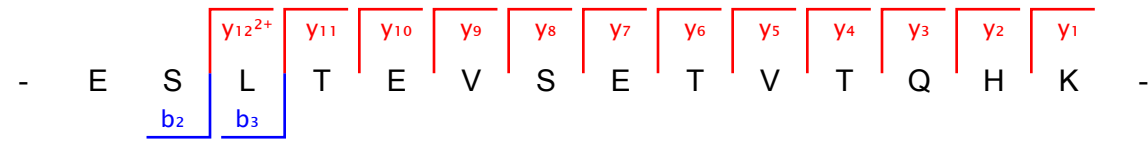

Scan 26668 Method FTMS; HCD Score 88.06 m/z 599.29

Supplementary Fig. 3  
7 of 16 peptide mass spectra

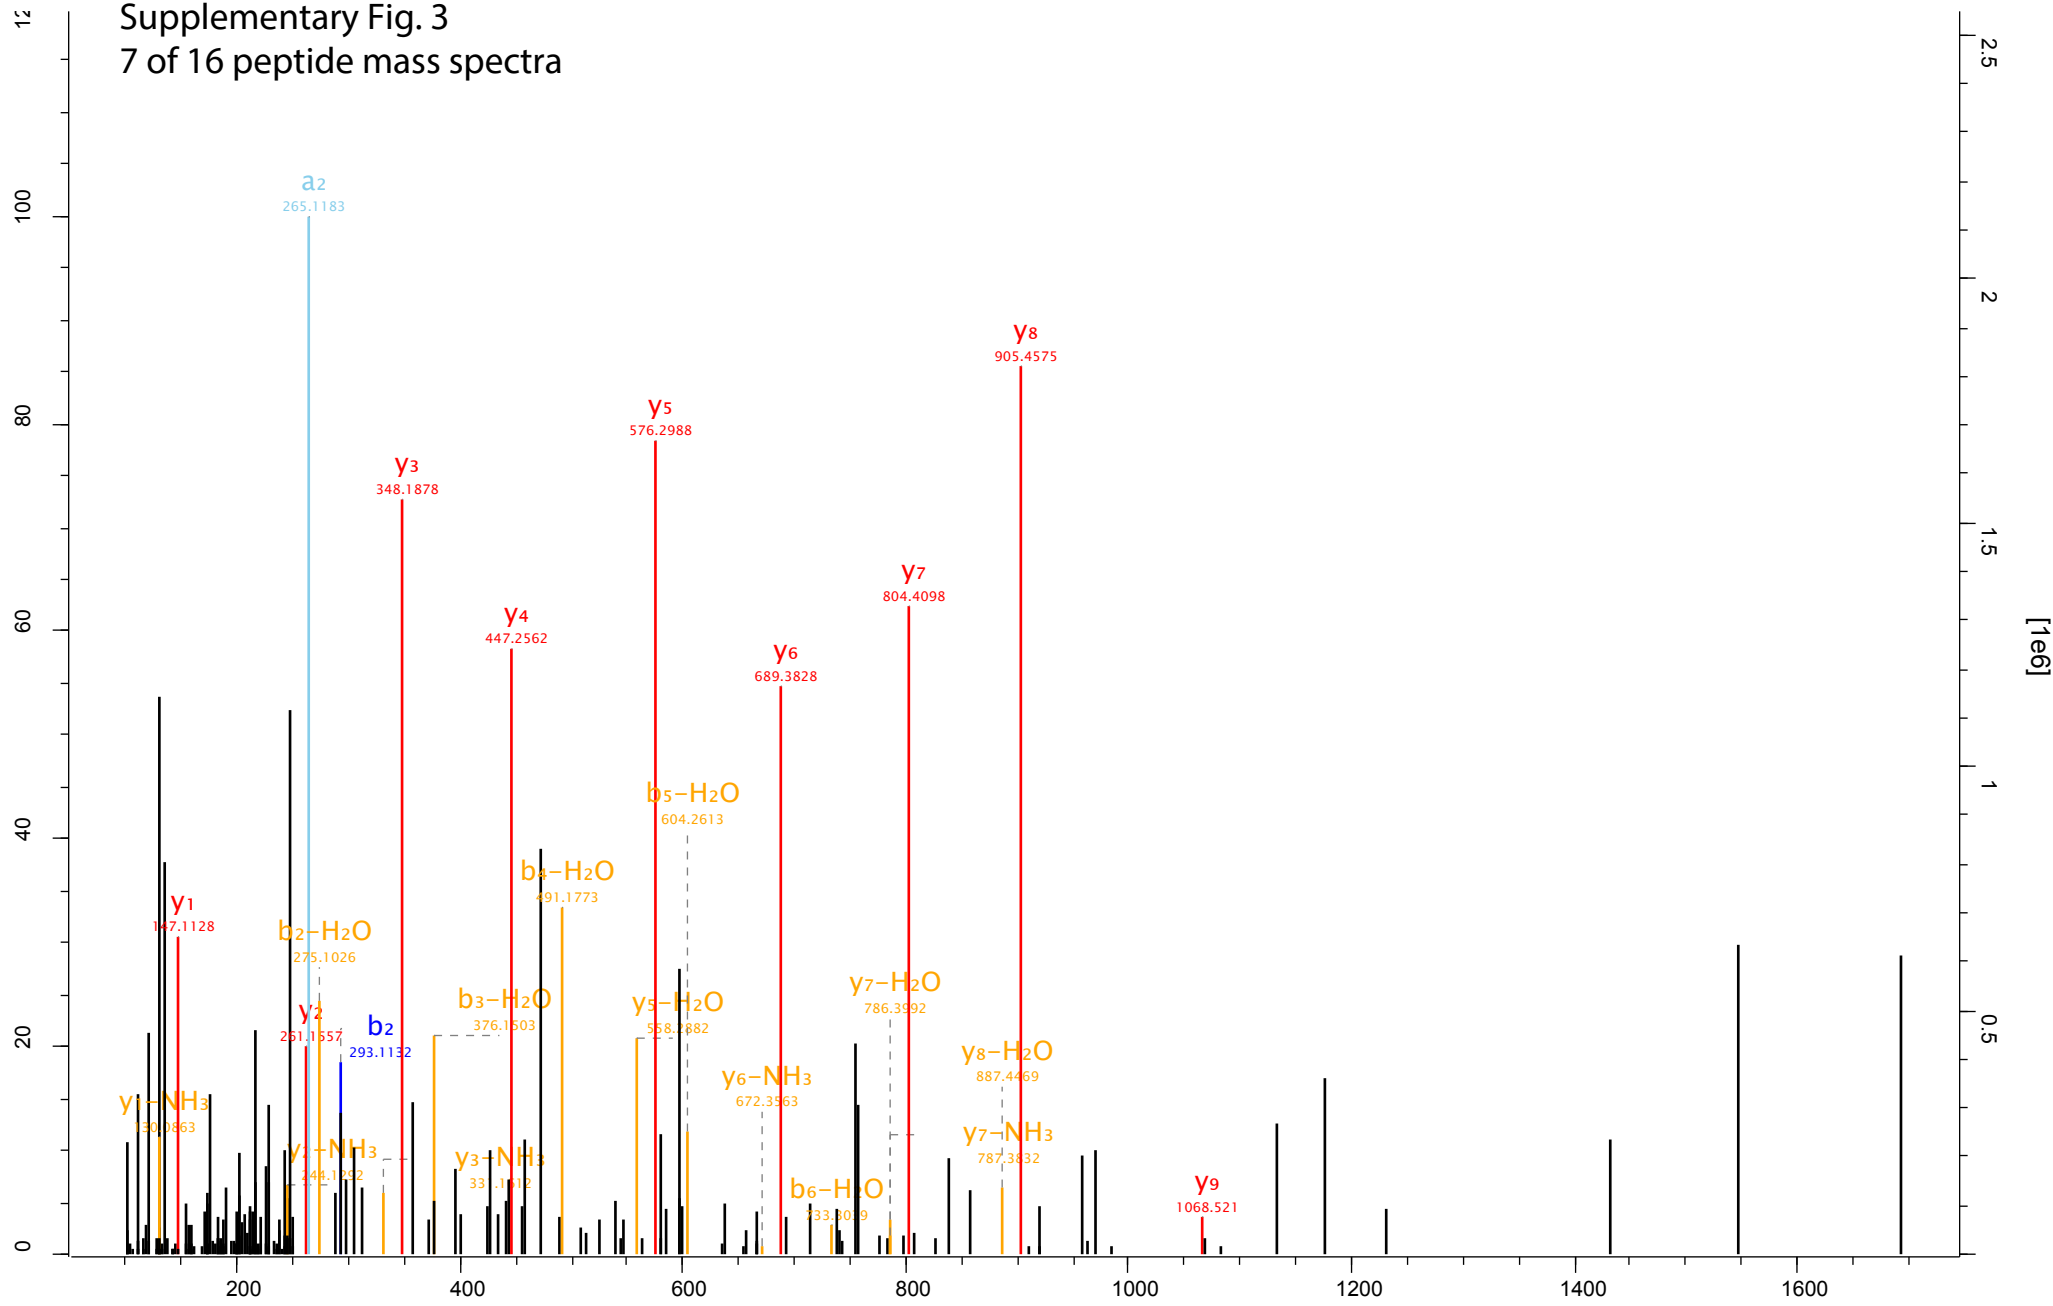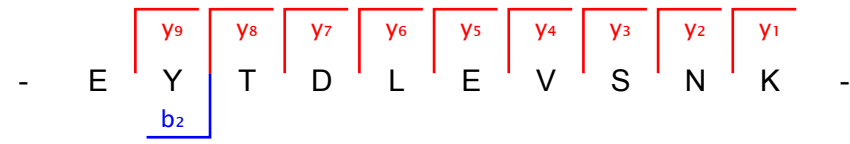



Scan Method Score m/z  
 89618 FTMS; HCD 70.56 672.34

Supplementary Fig. 3  
 8 of 16 peptide mass spectra

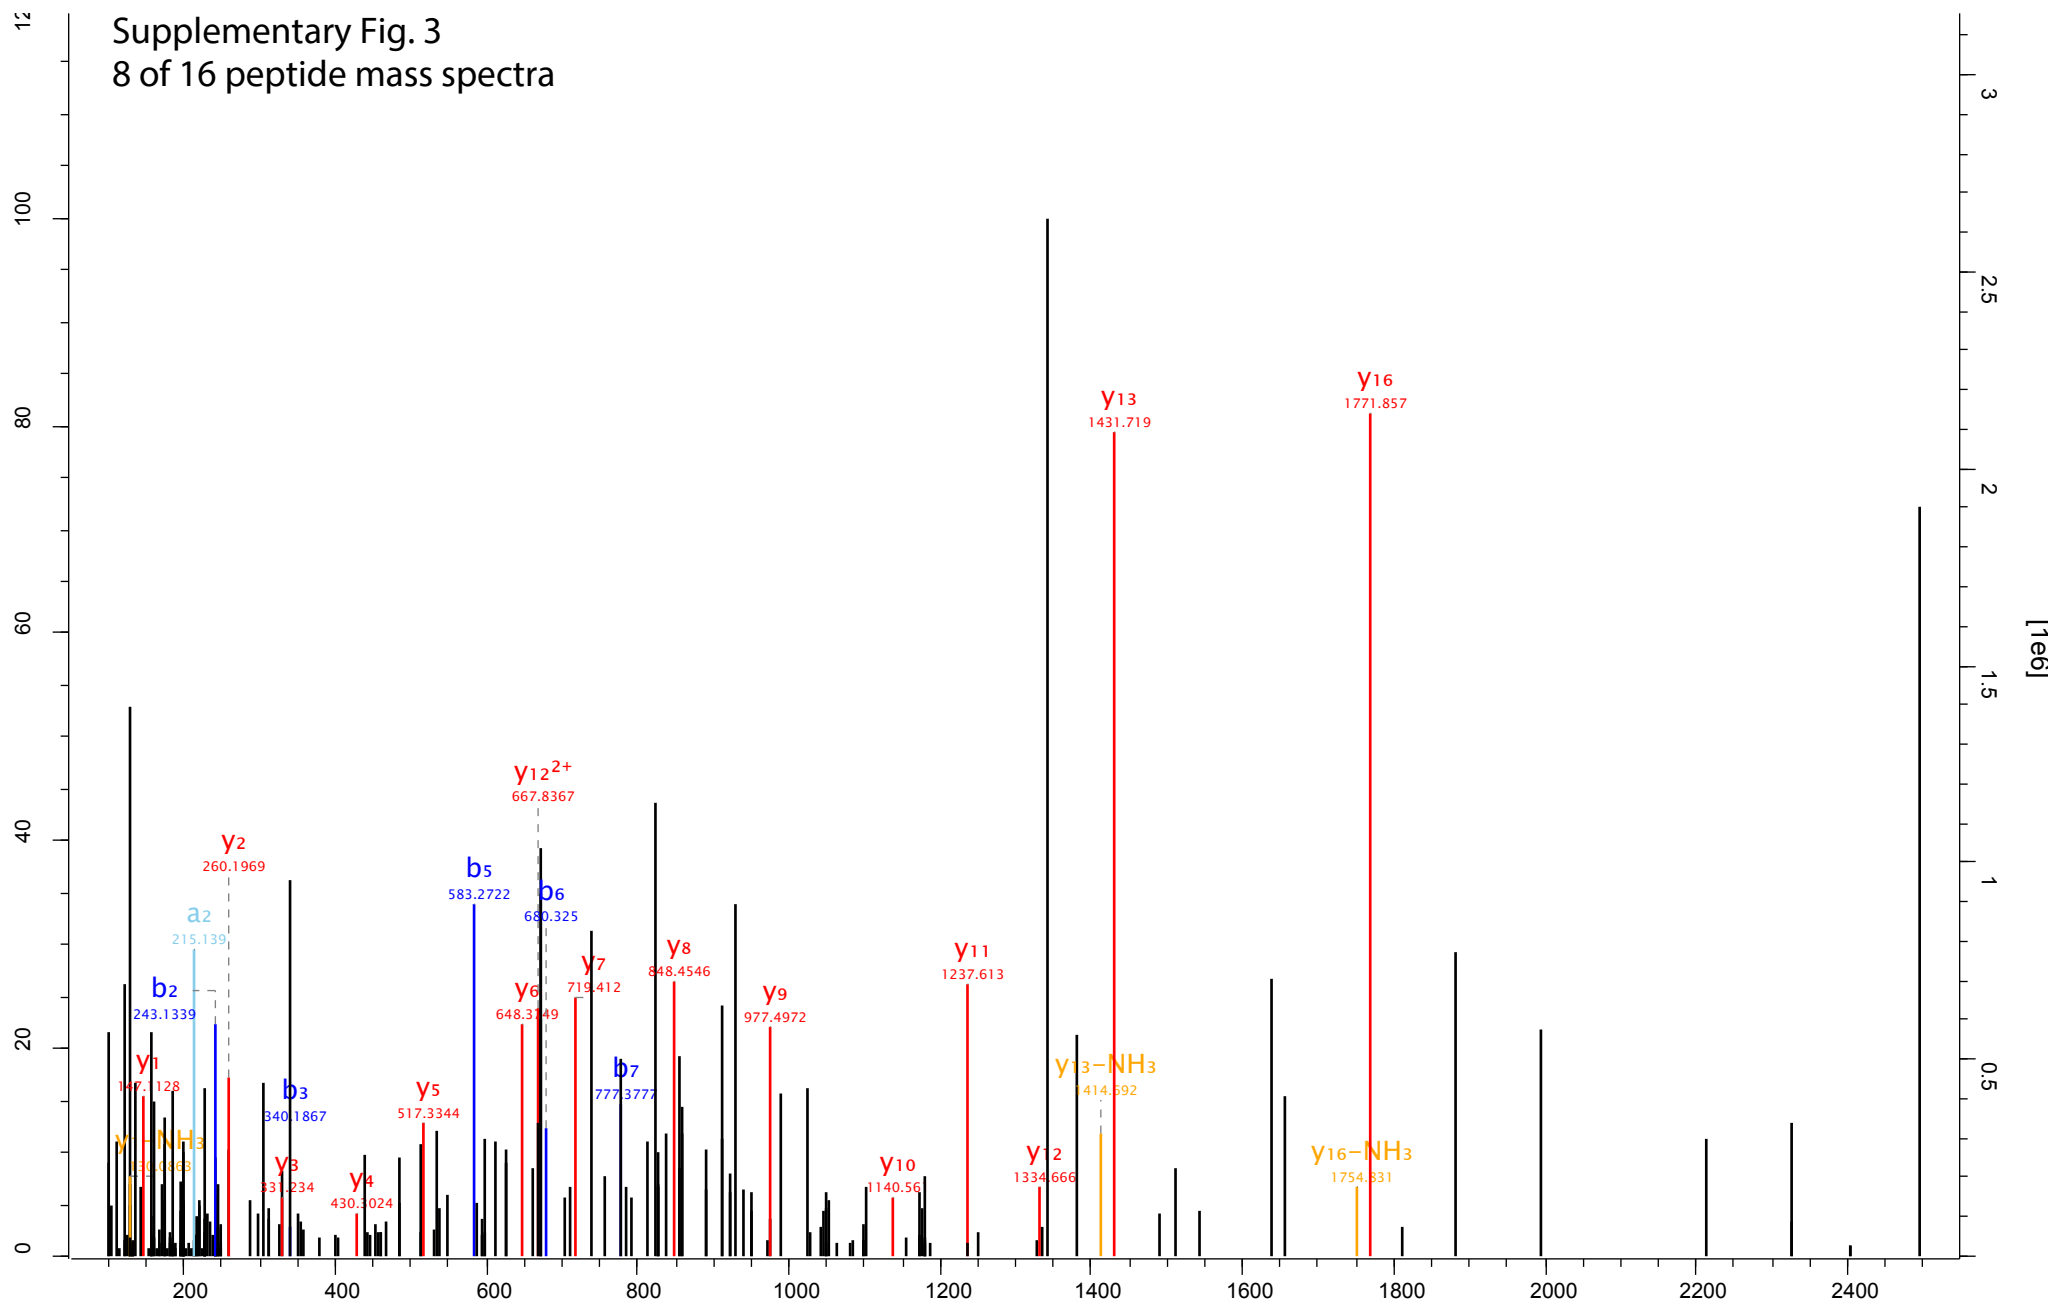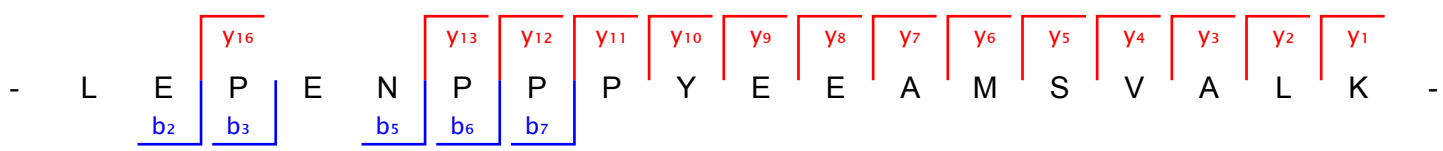

Scan Method Score m/z  
 64737 FTMS; HCD 105.89 949.96

Supplementary Fig. 3  
 9 of 16 peptide mass spectra

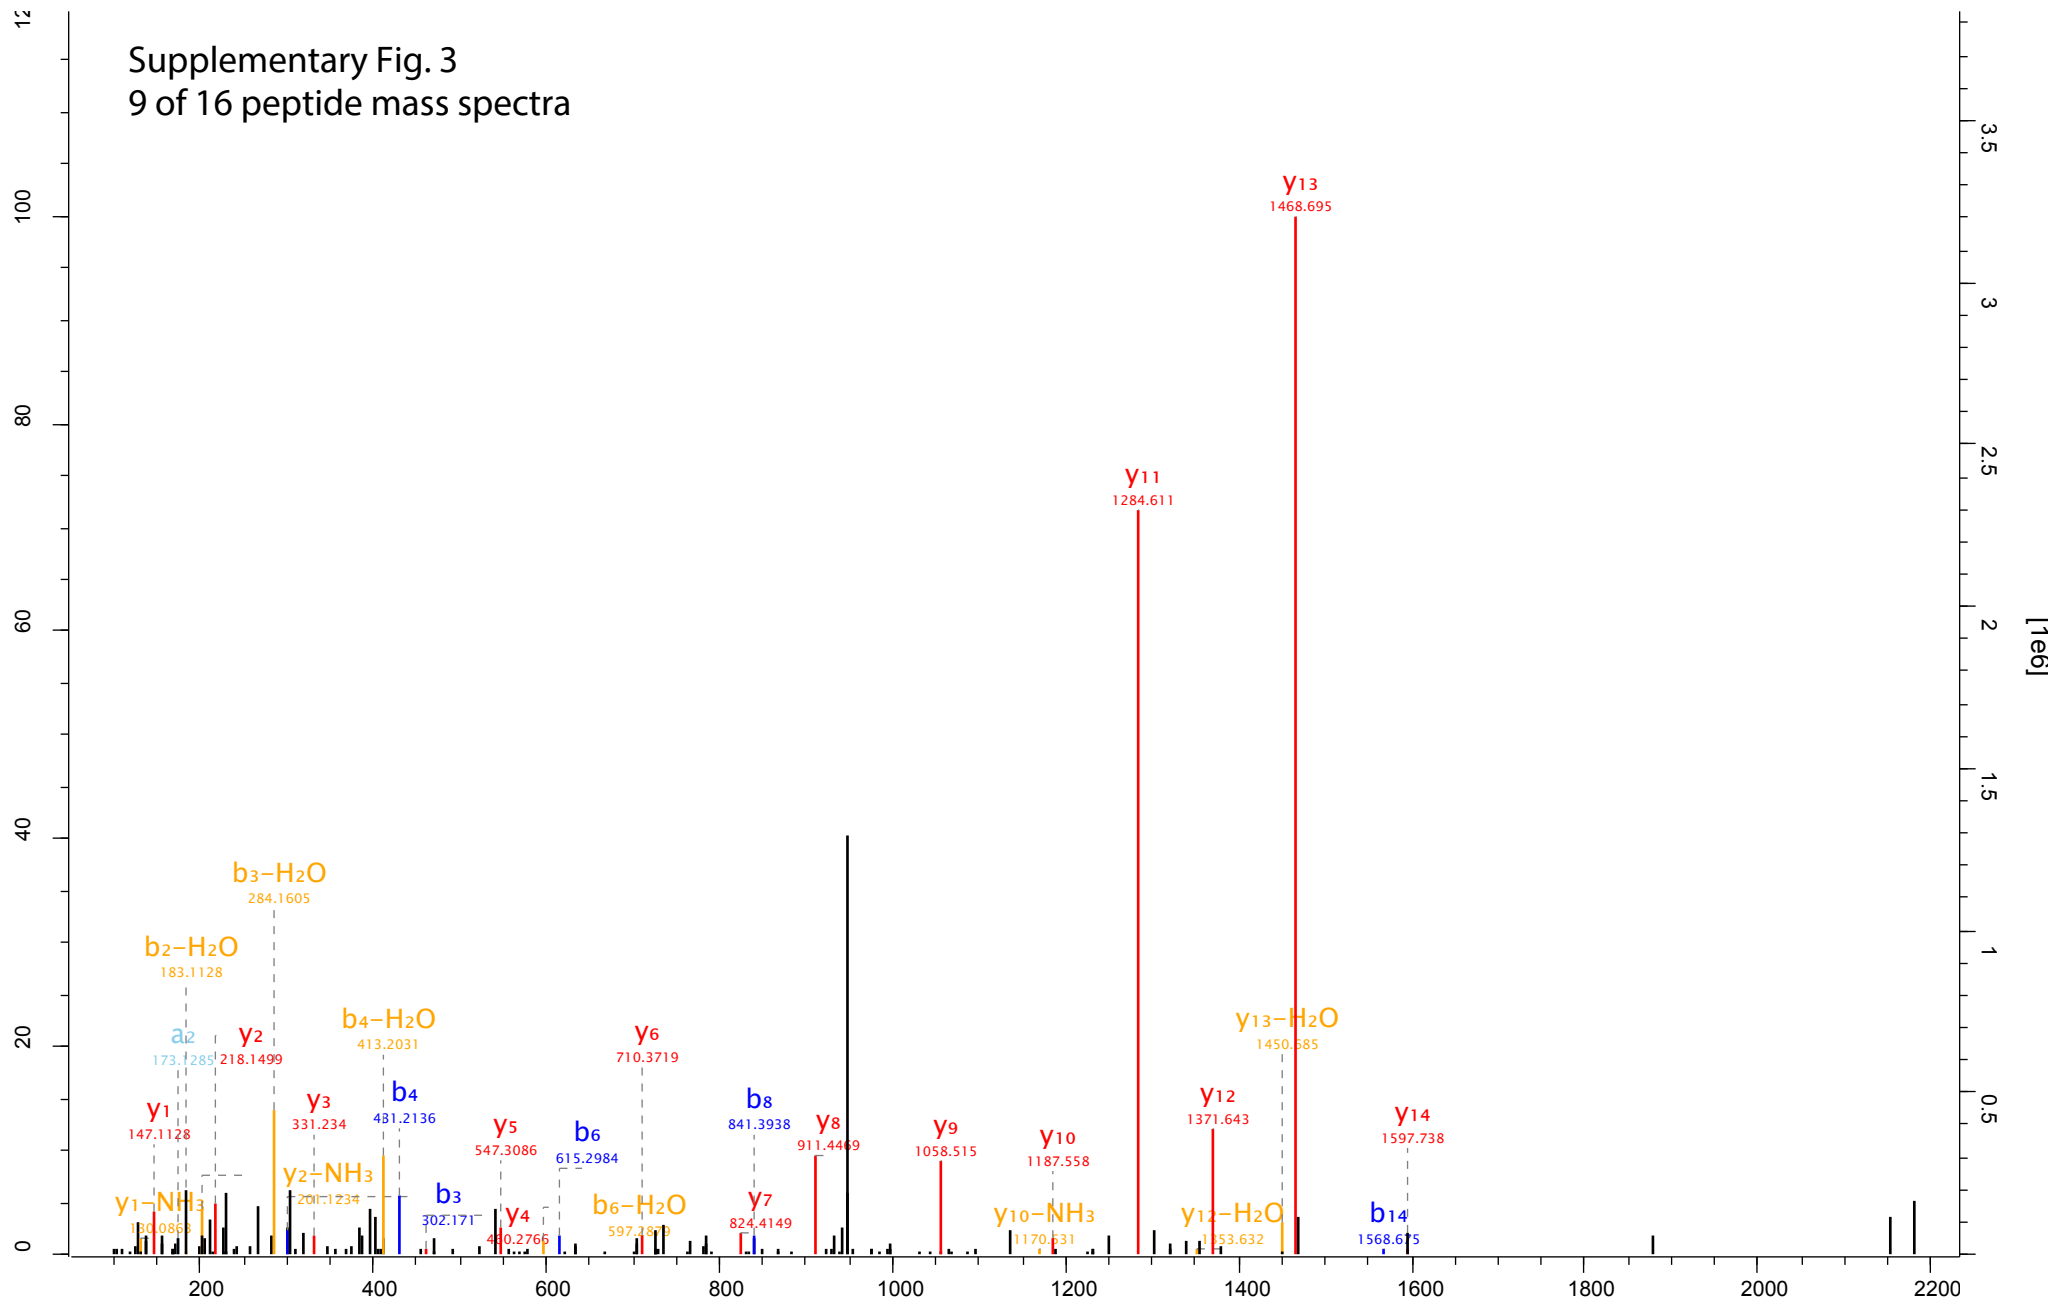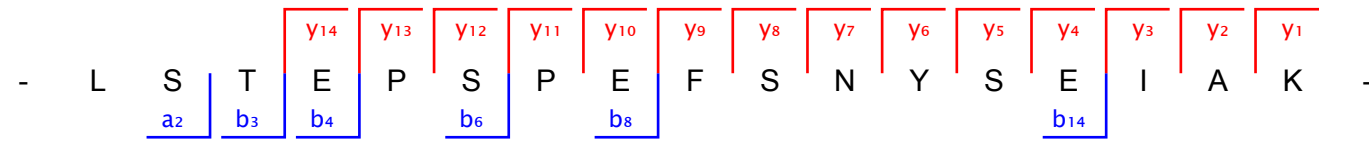

Supplementary Fig. 3  
10 of 16 peptide mass spectra

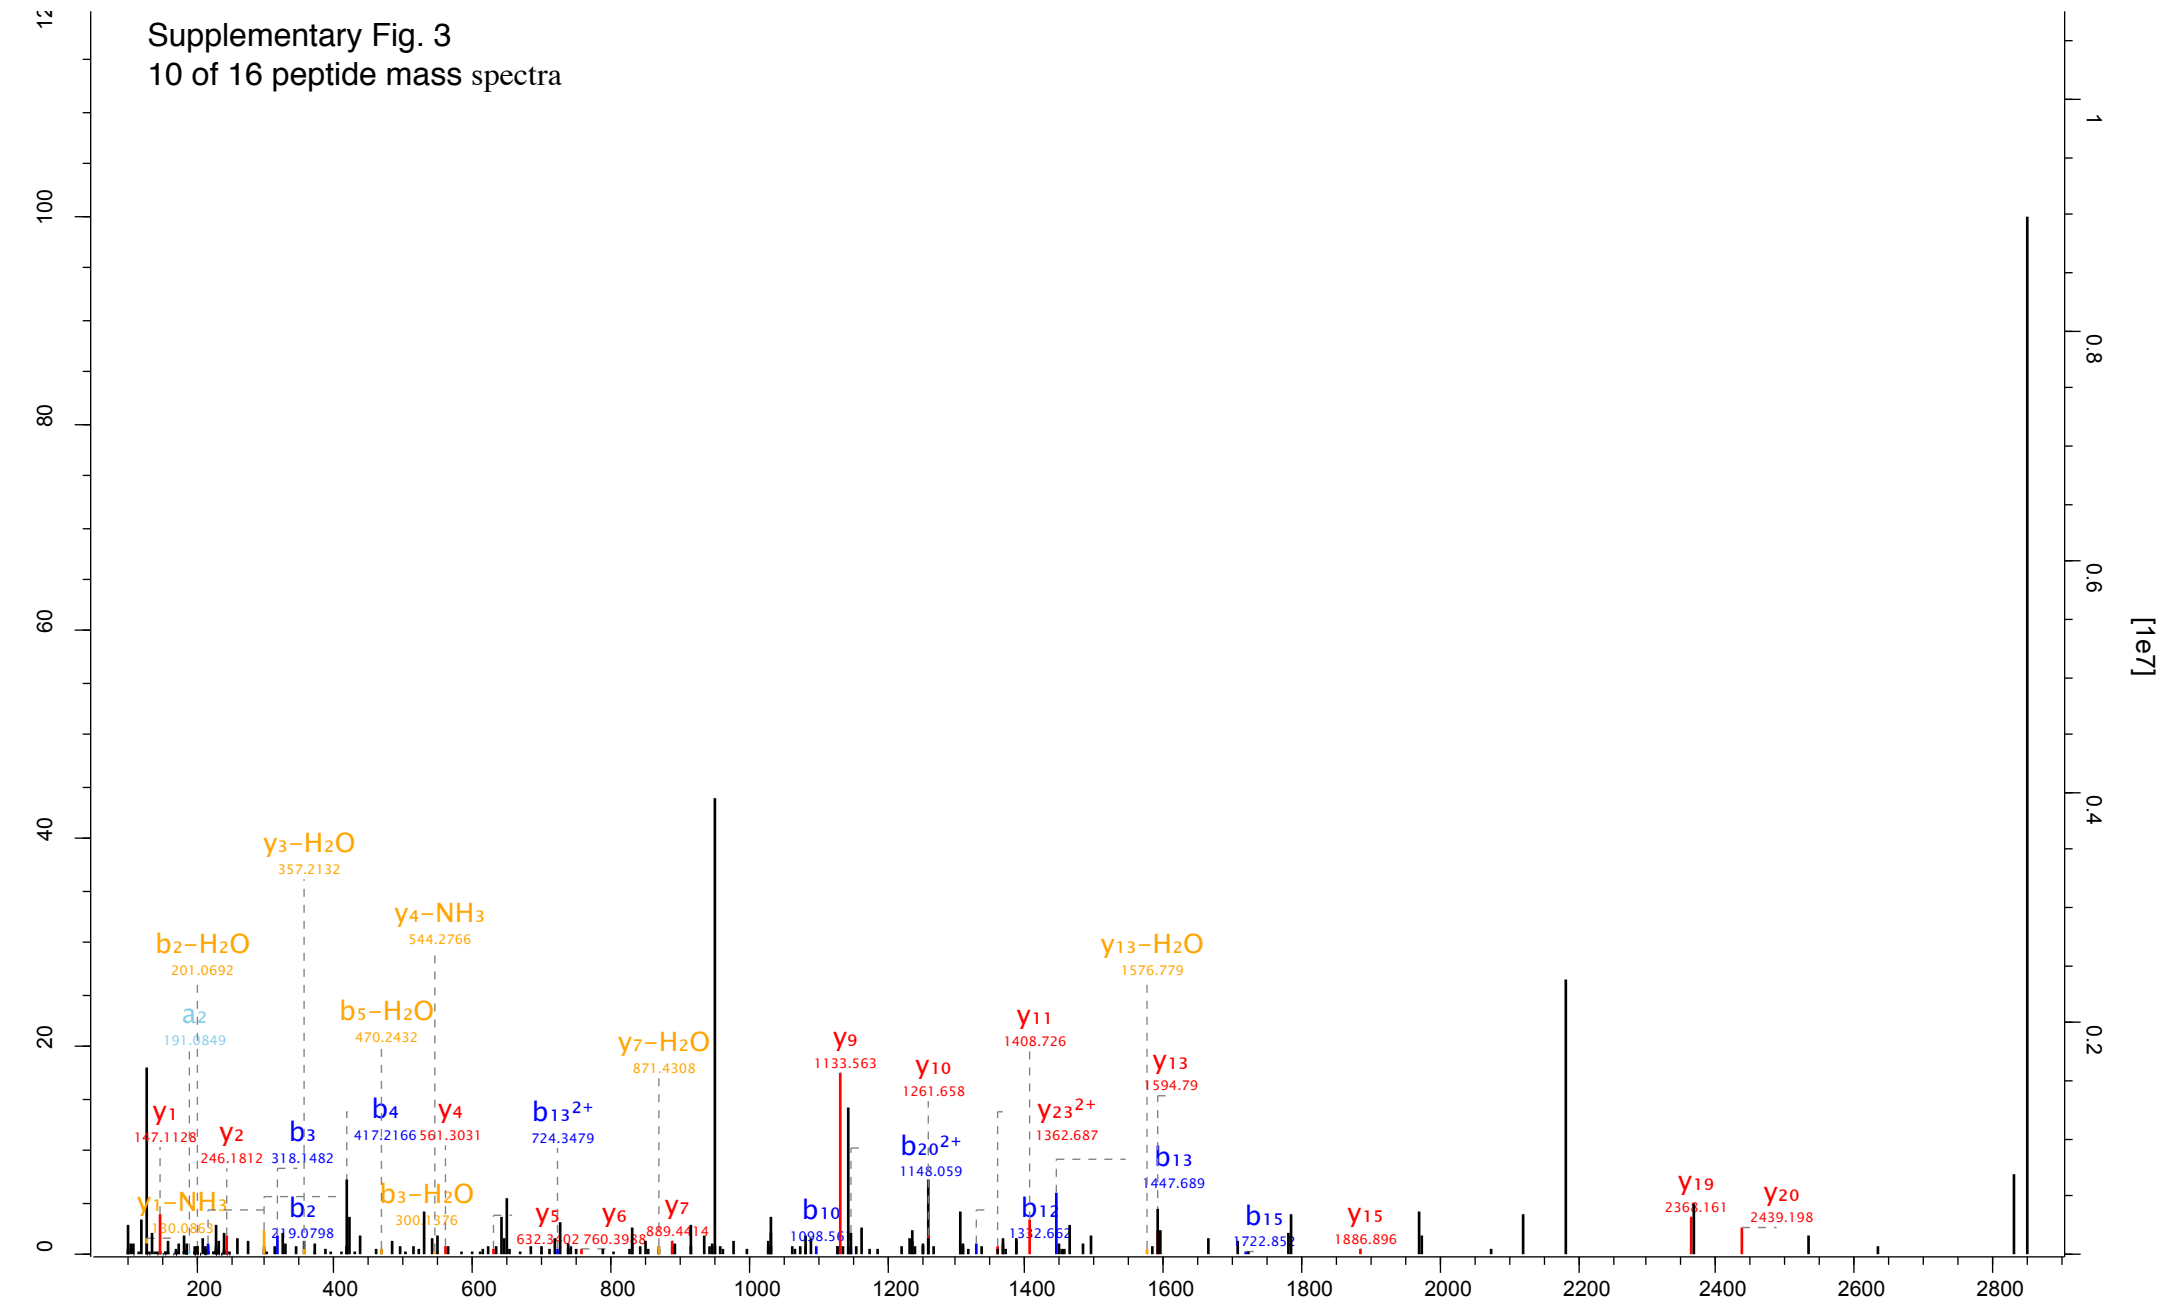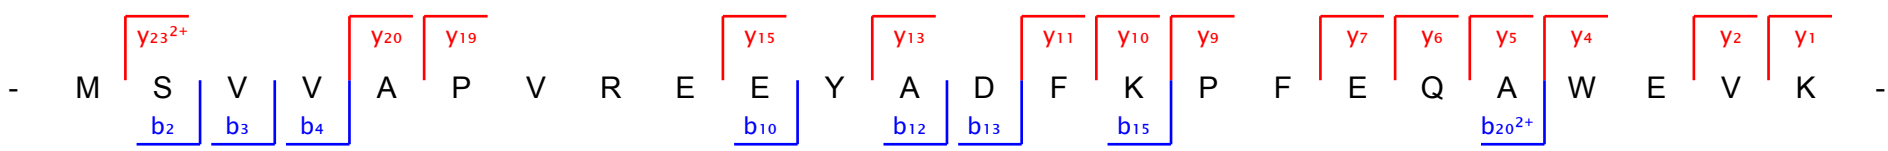

Scan Method Score m/z  
 58602 FTMS; HCD 146.59 766.89

Supplementary Fig. 3  
 11 of 16 peptide mass spectra

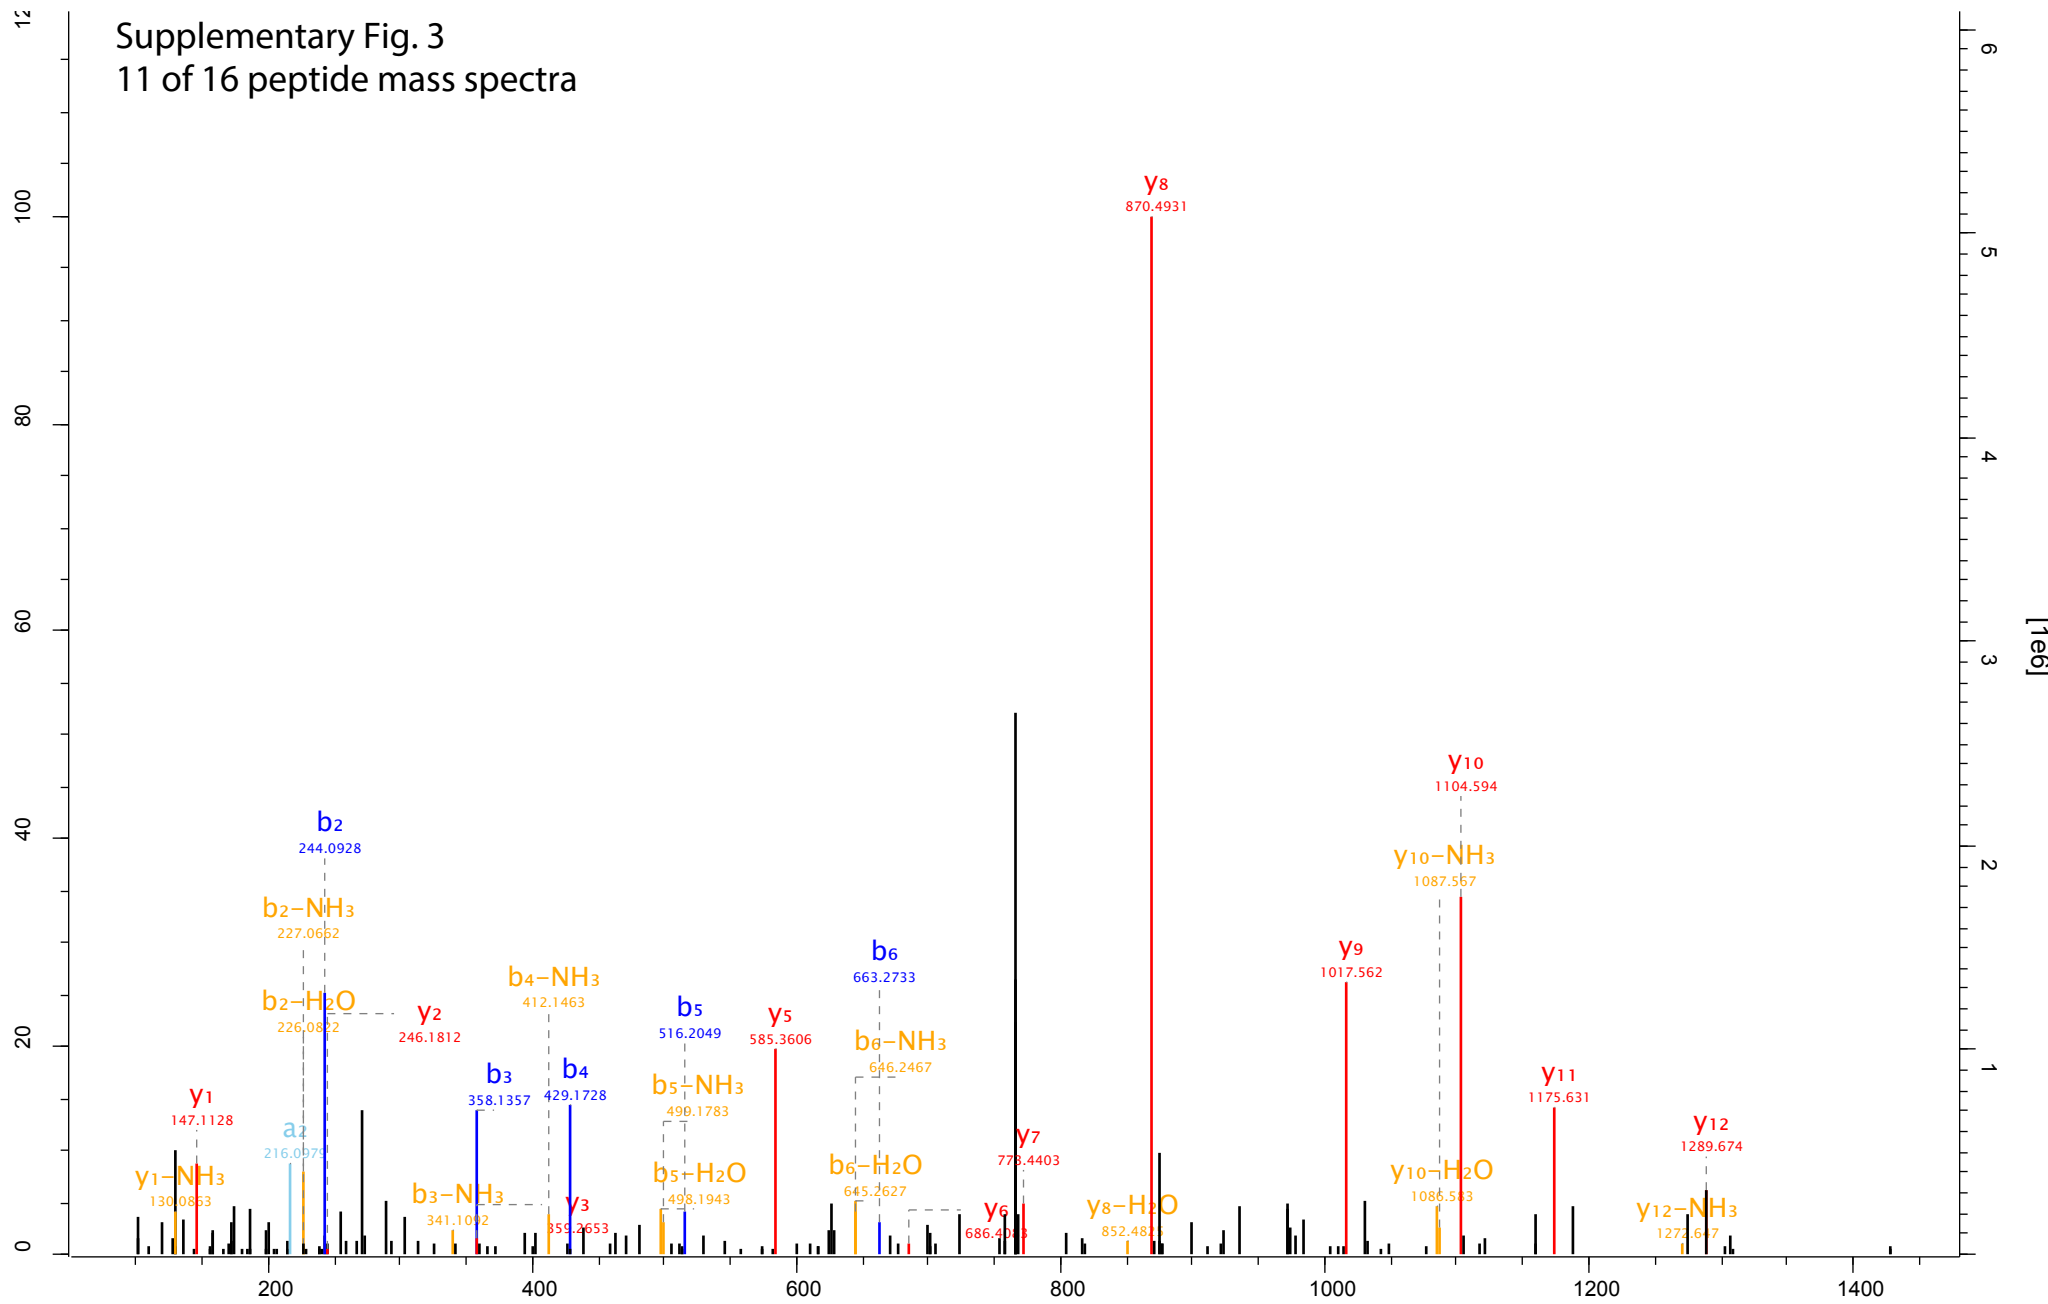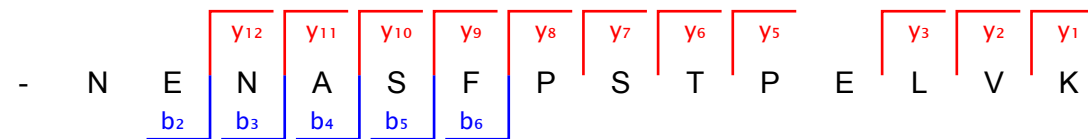

Scan 93362 Method FTMS; HCD Score 74.66 m/z 909.1

Supplementary Fig. 3  
12 of 16 peptide mass spectra

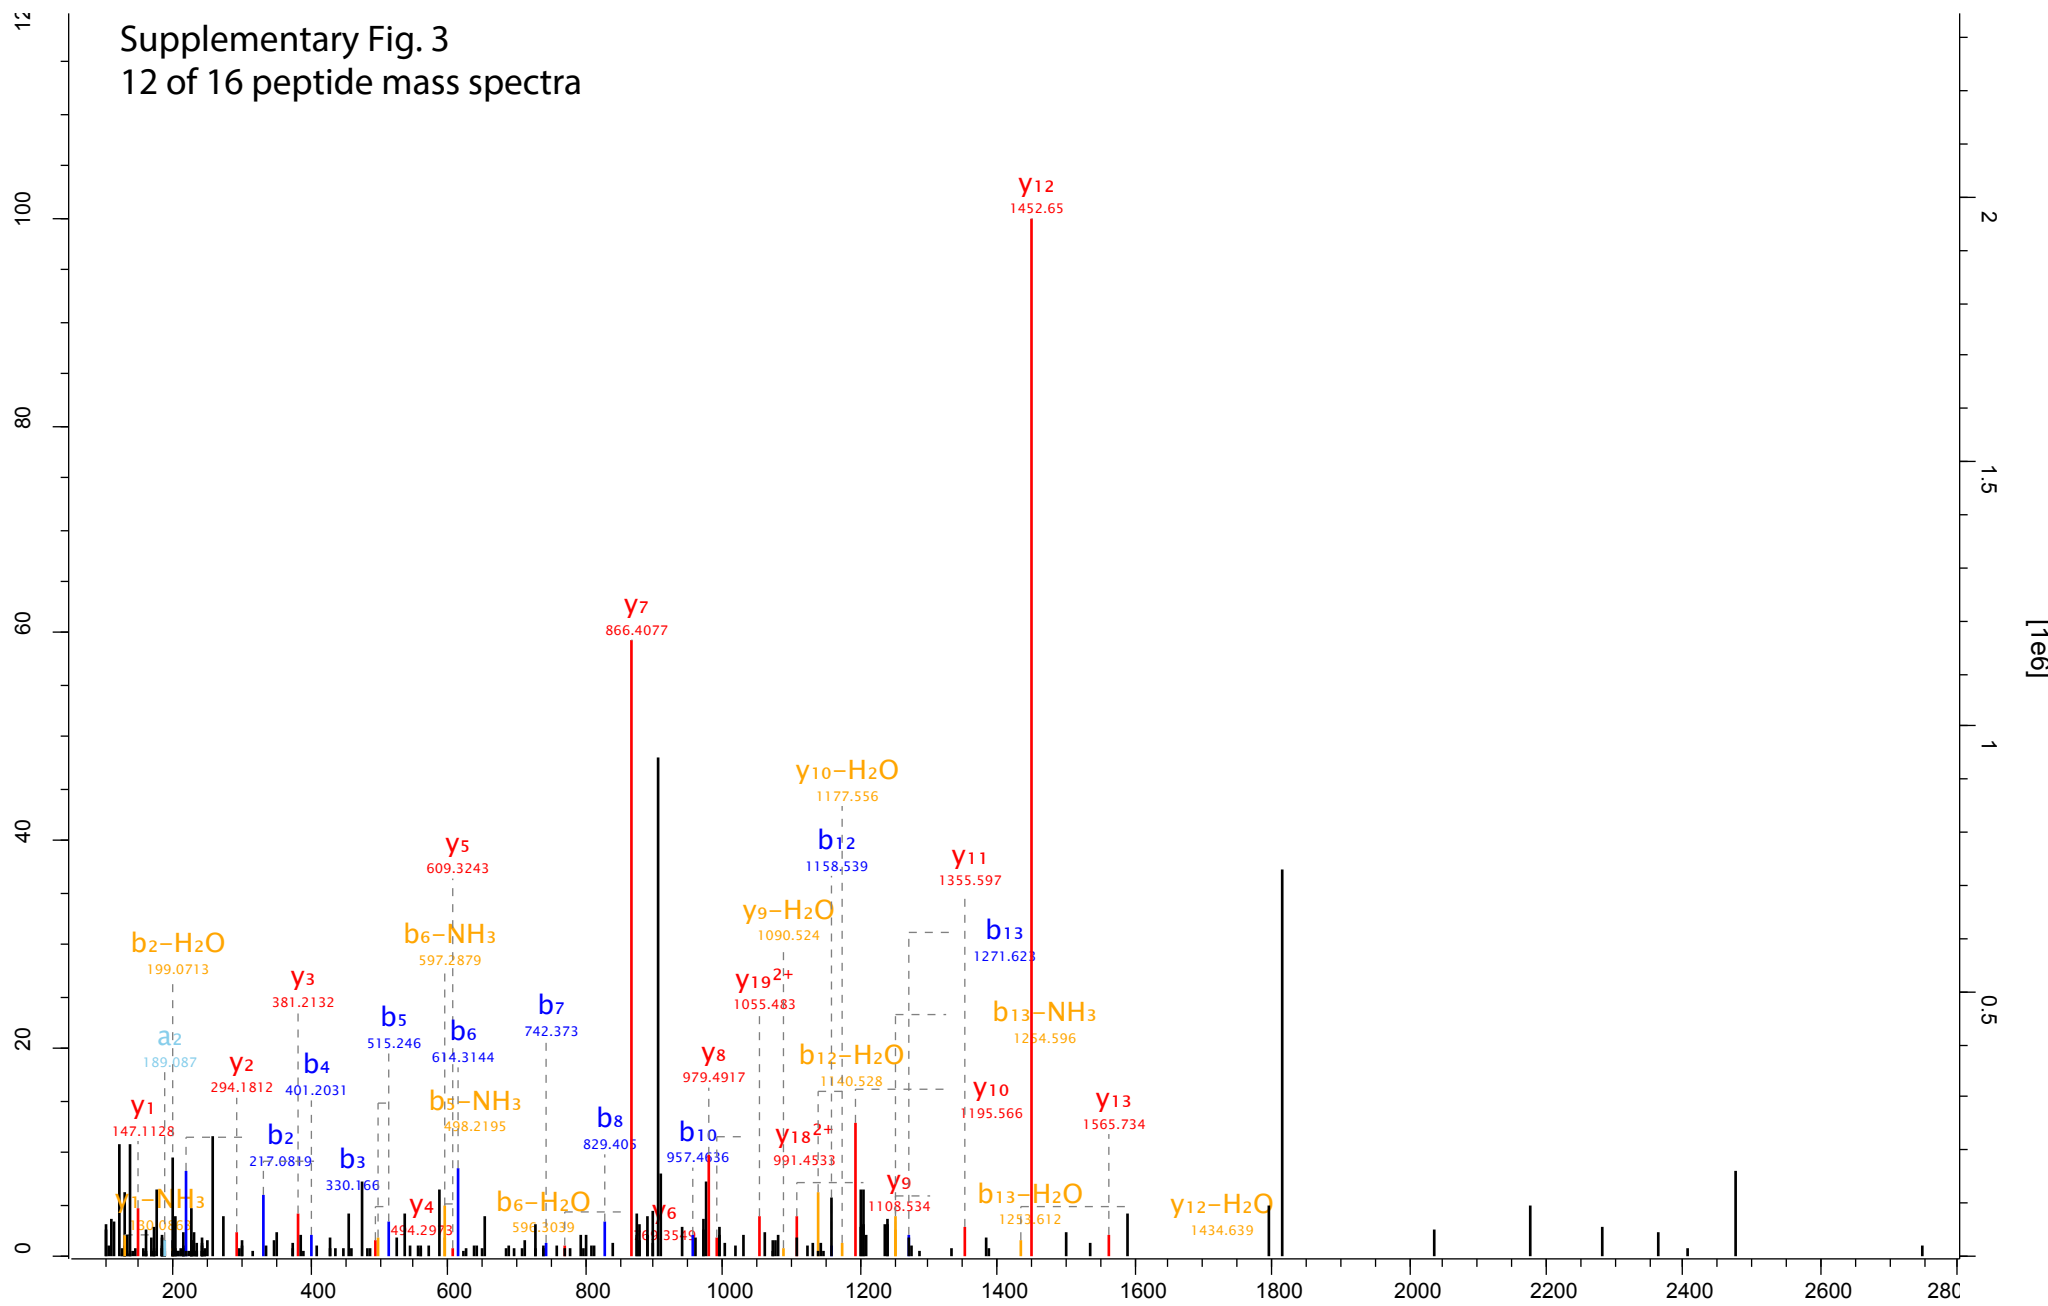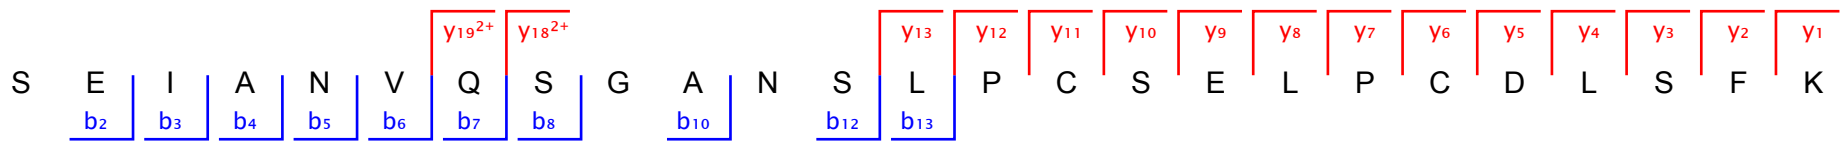

Scan Method Score m/z  
 41459 FTMS; HCD 179.64 914.46

Supplementary Fig. 3  
 13 of 16 peptide mass spectra

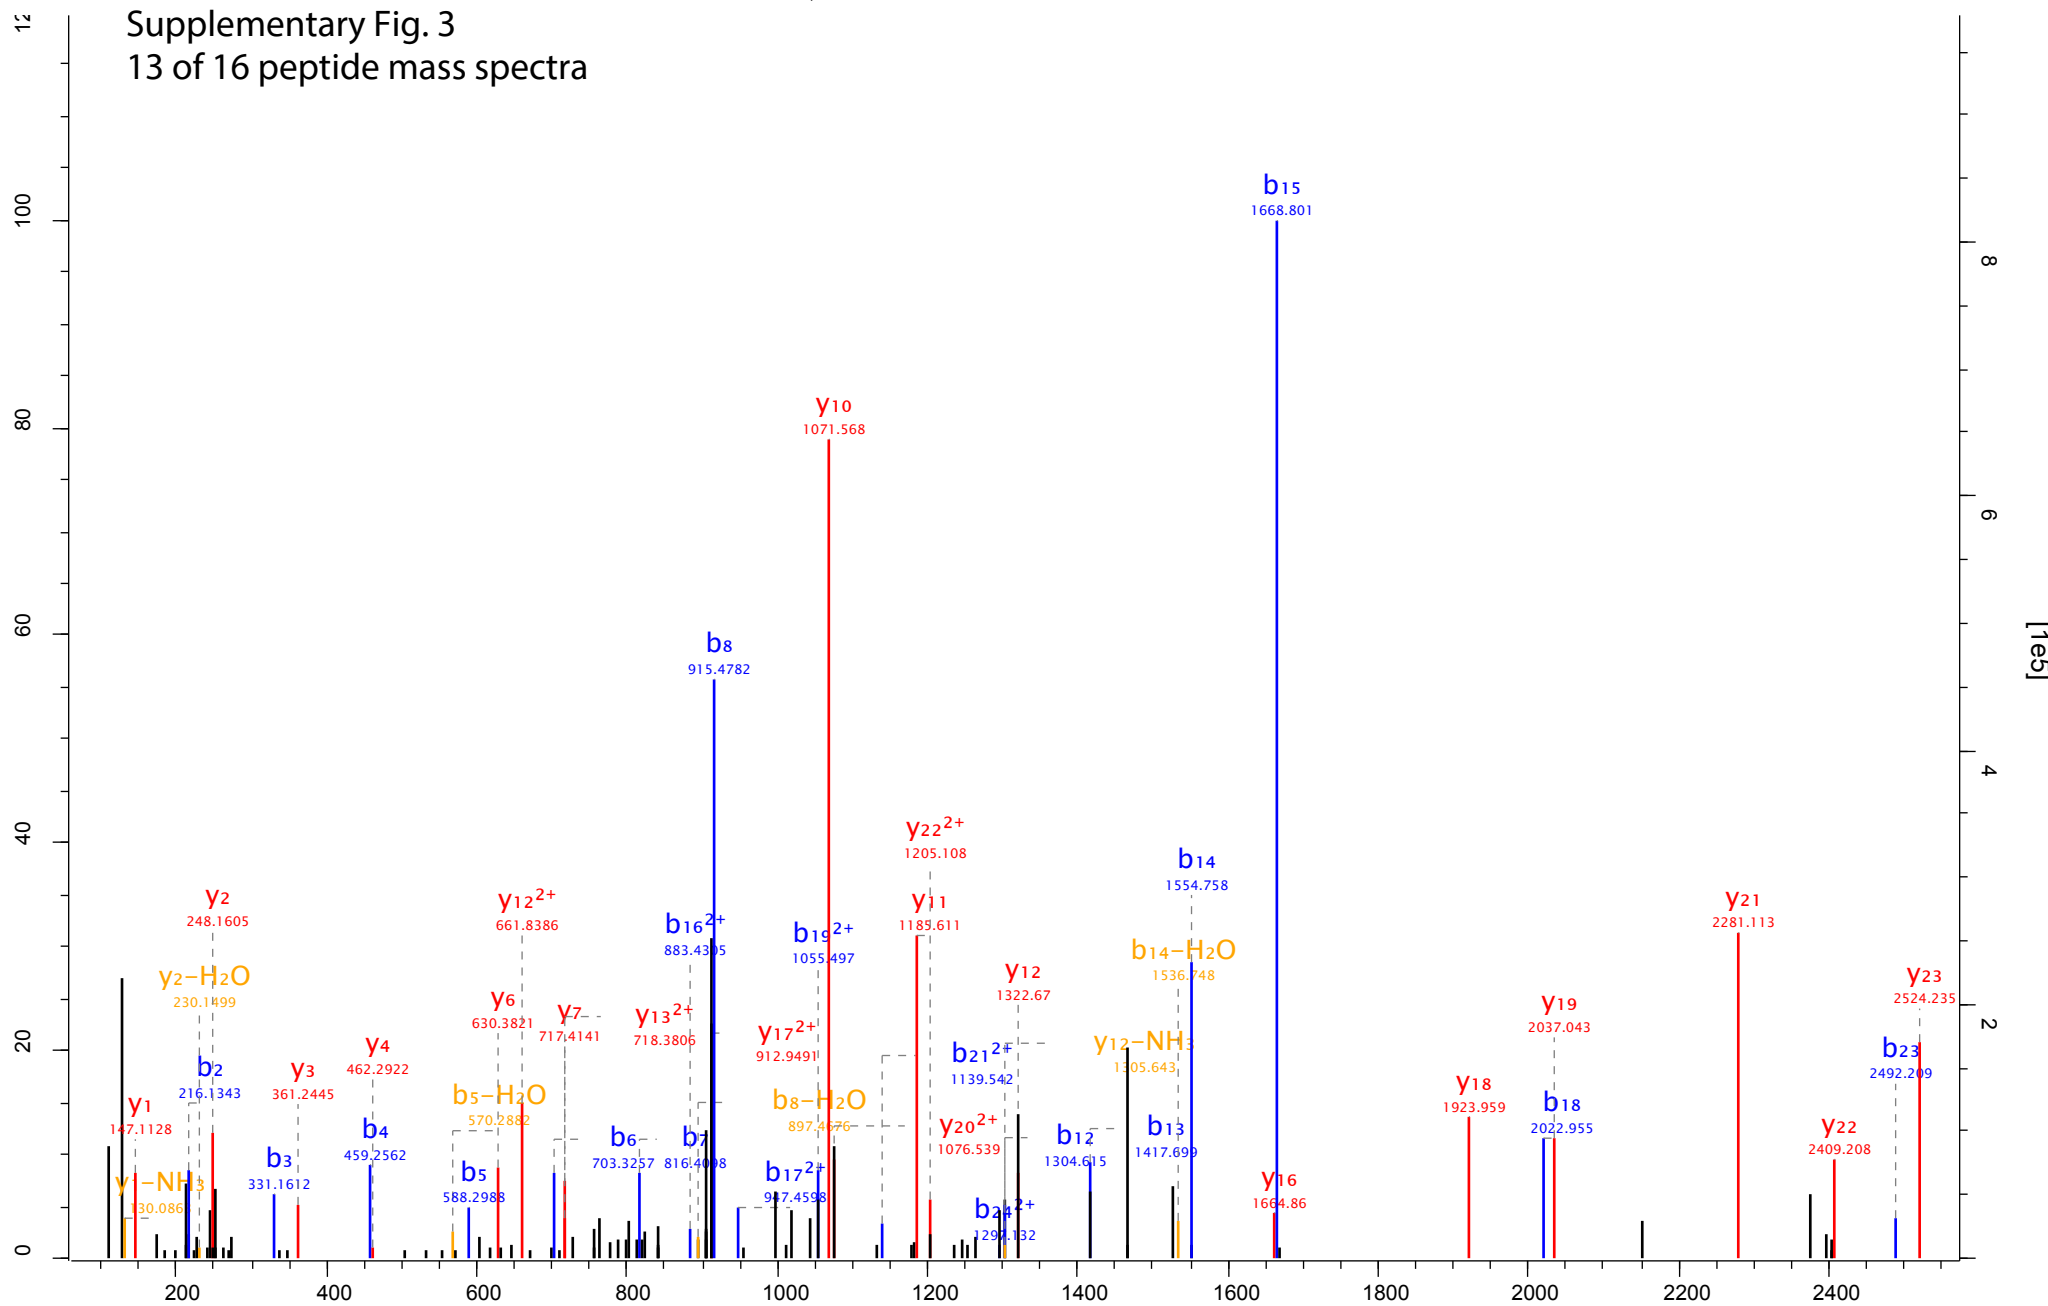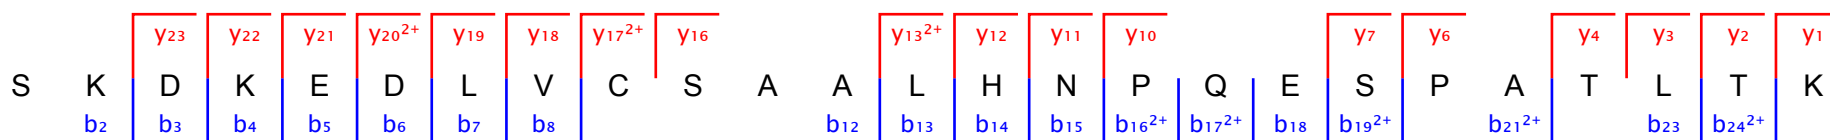

Scan 68376 Method FTMS; HCD Score 50.3 m/z 564.75

Supplementary Fig. 3  
14 of 16 peptide mass spectra

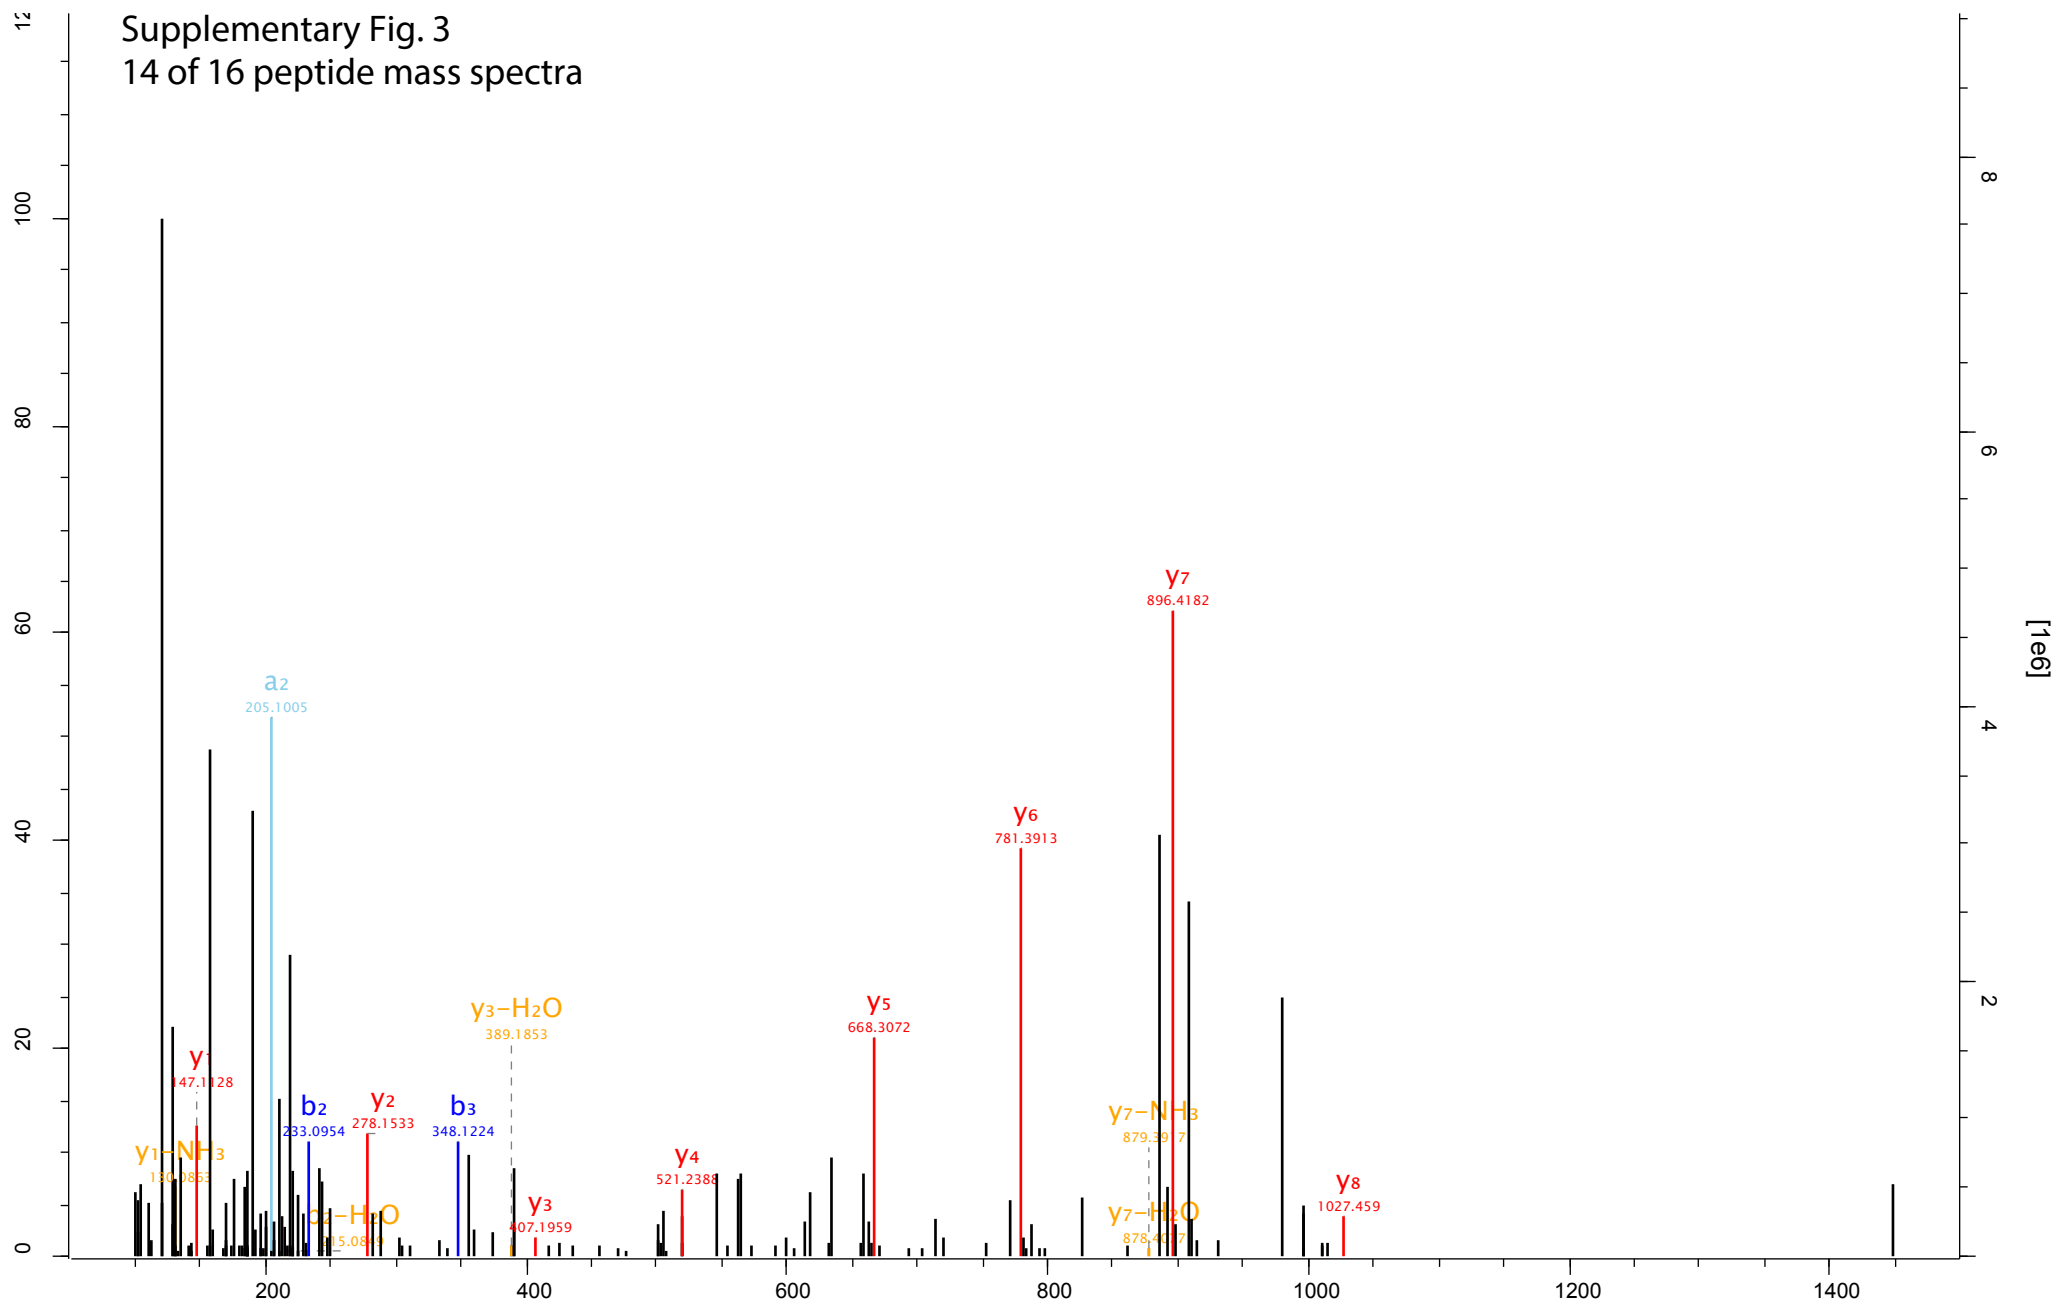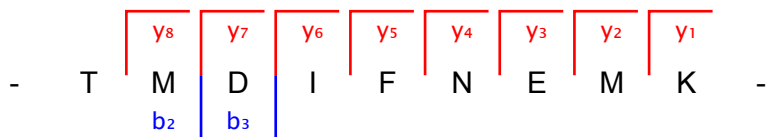

Supplementary Fig. 3  
15 of 16 peptide mass spectra

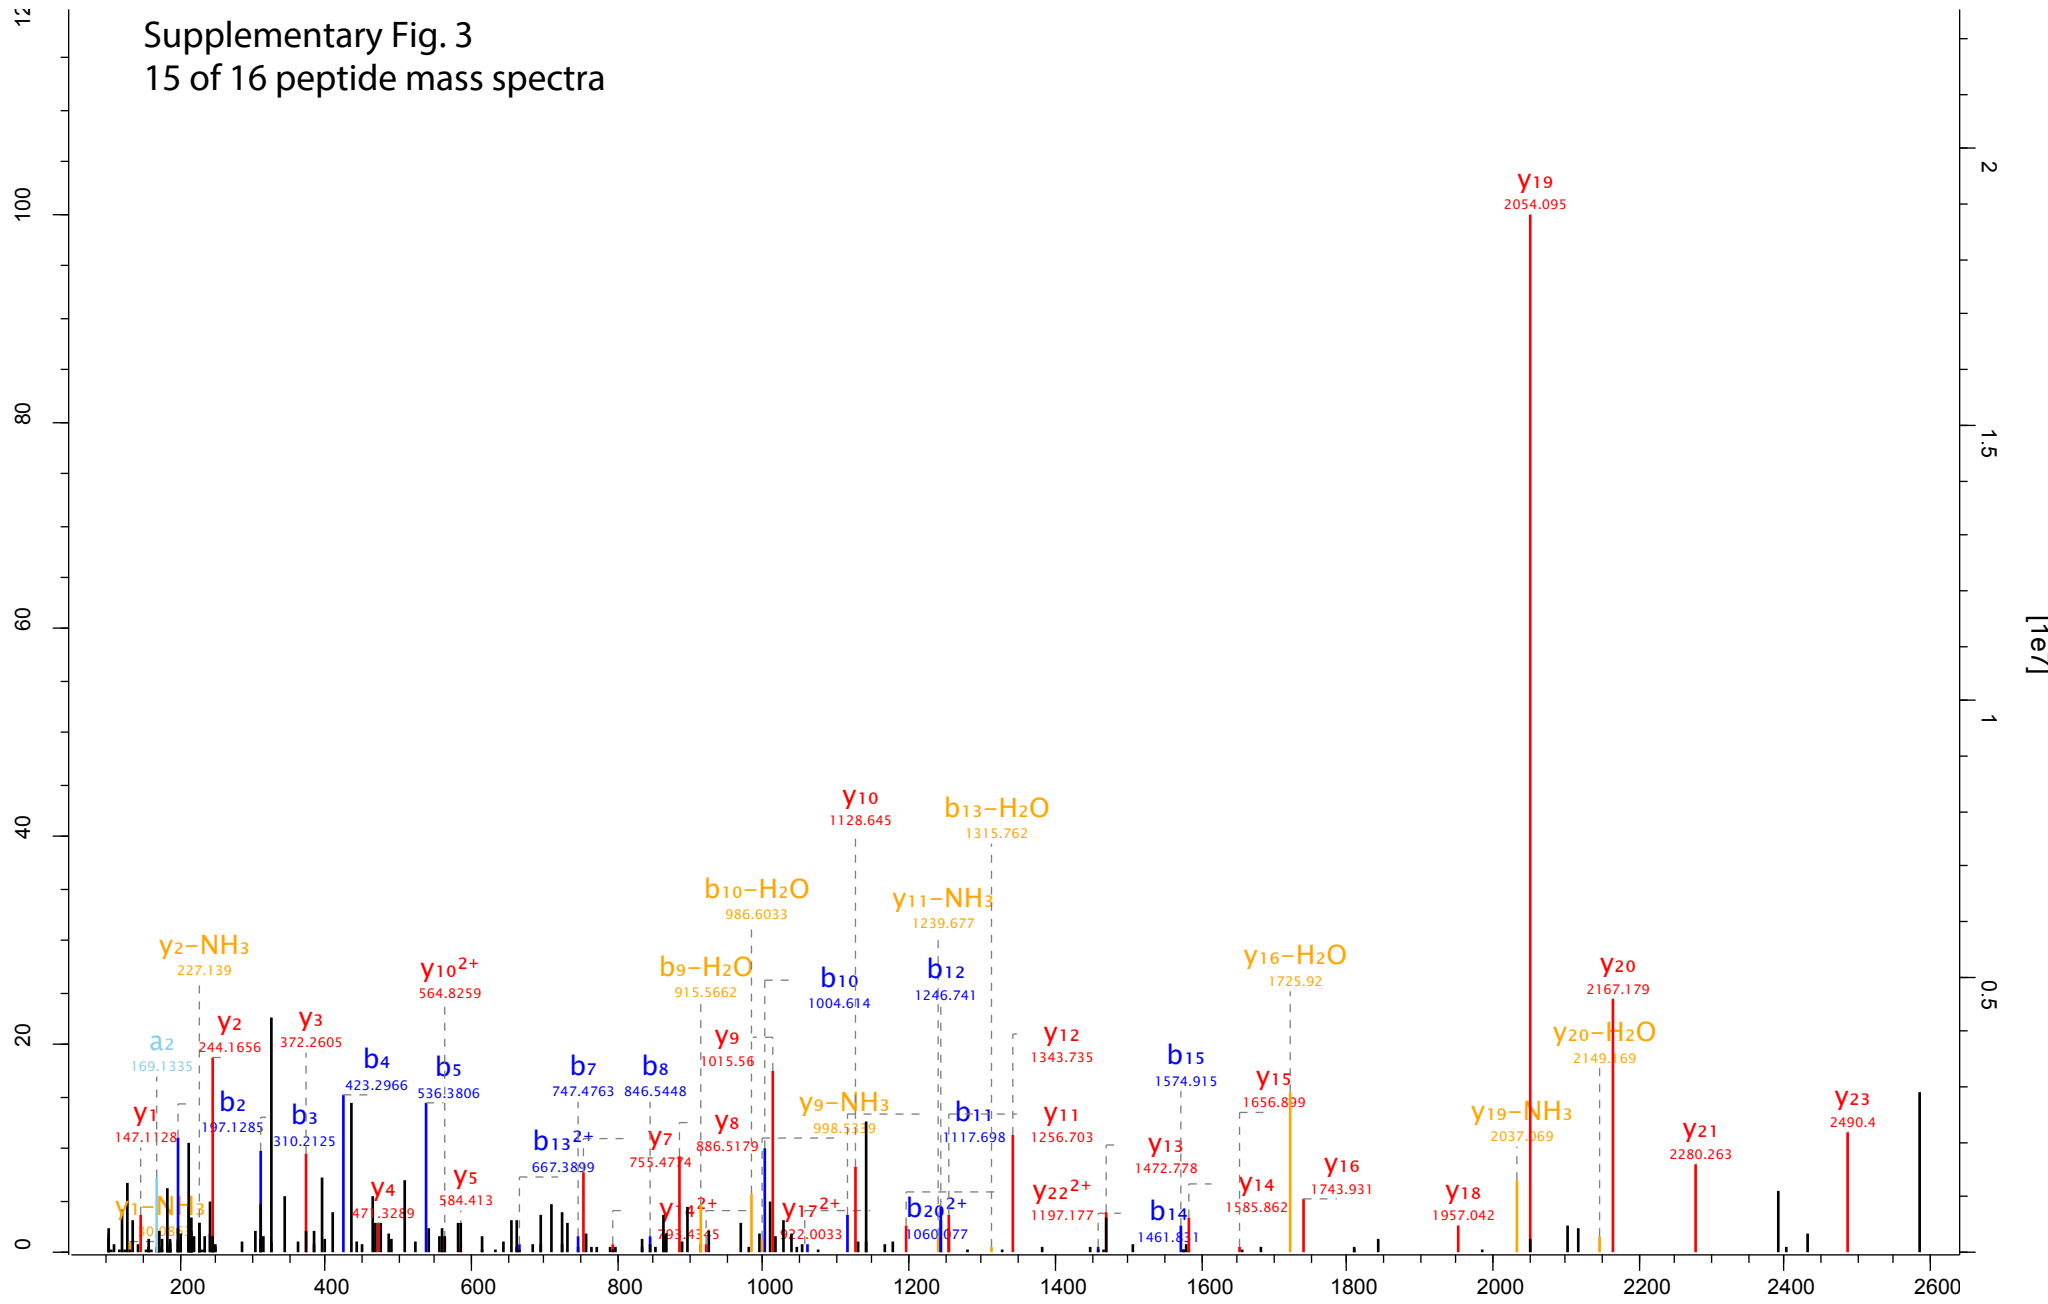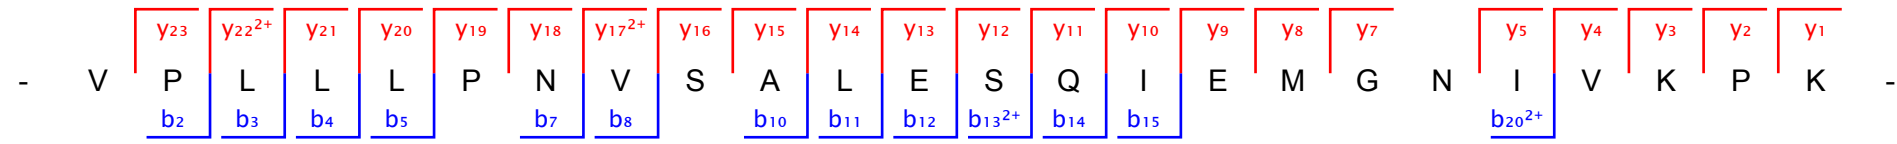



Scan Method Score m/z  
 11487 FTMS; HCD 114.21 659.34

Supplementary Fig. 3  
 16 of 16 peptide mass spectra

Supplementary Fig. 6  
 16 of 52 peptide mass spectra

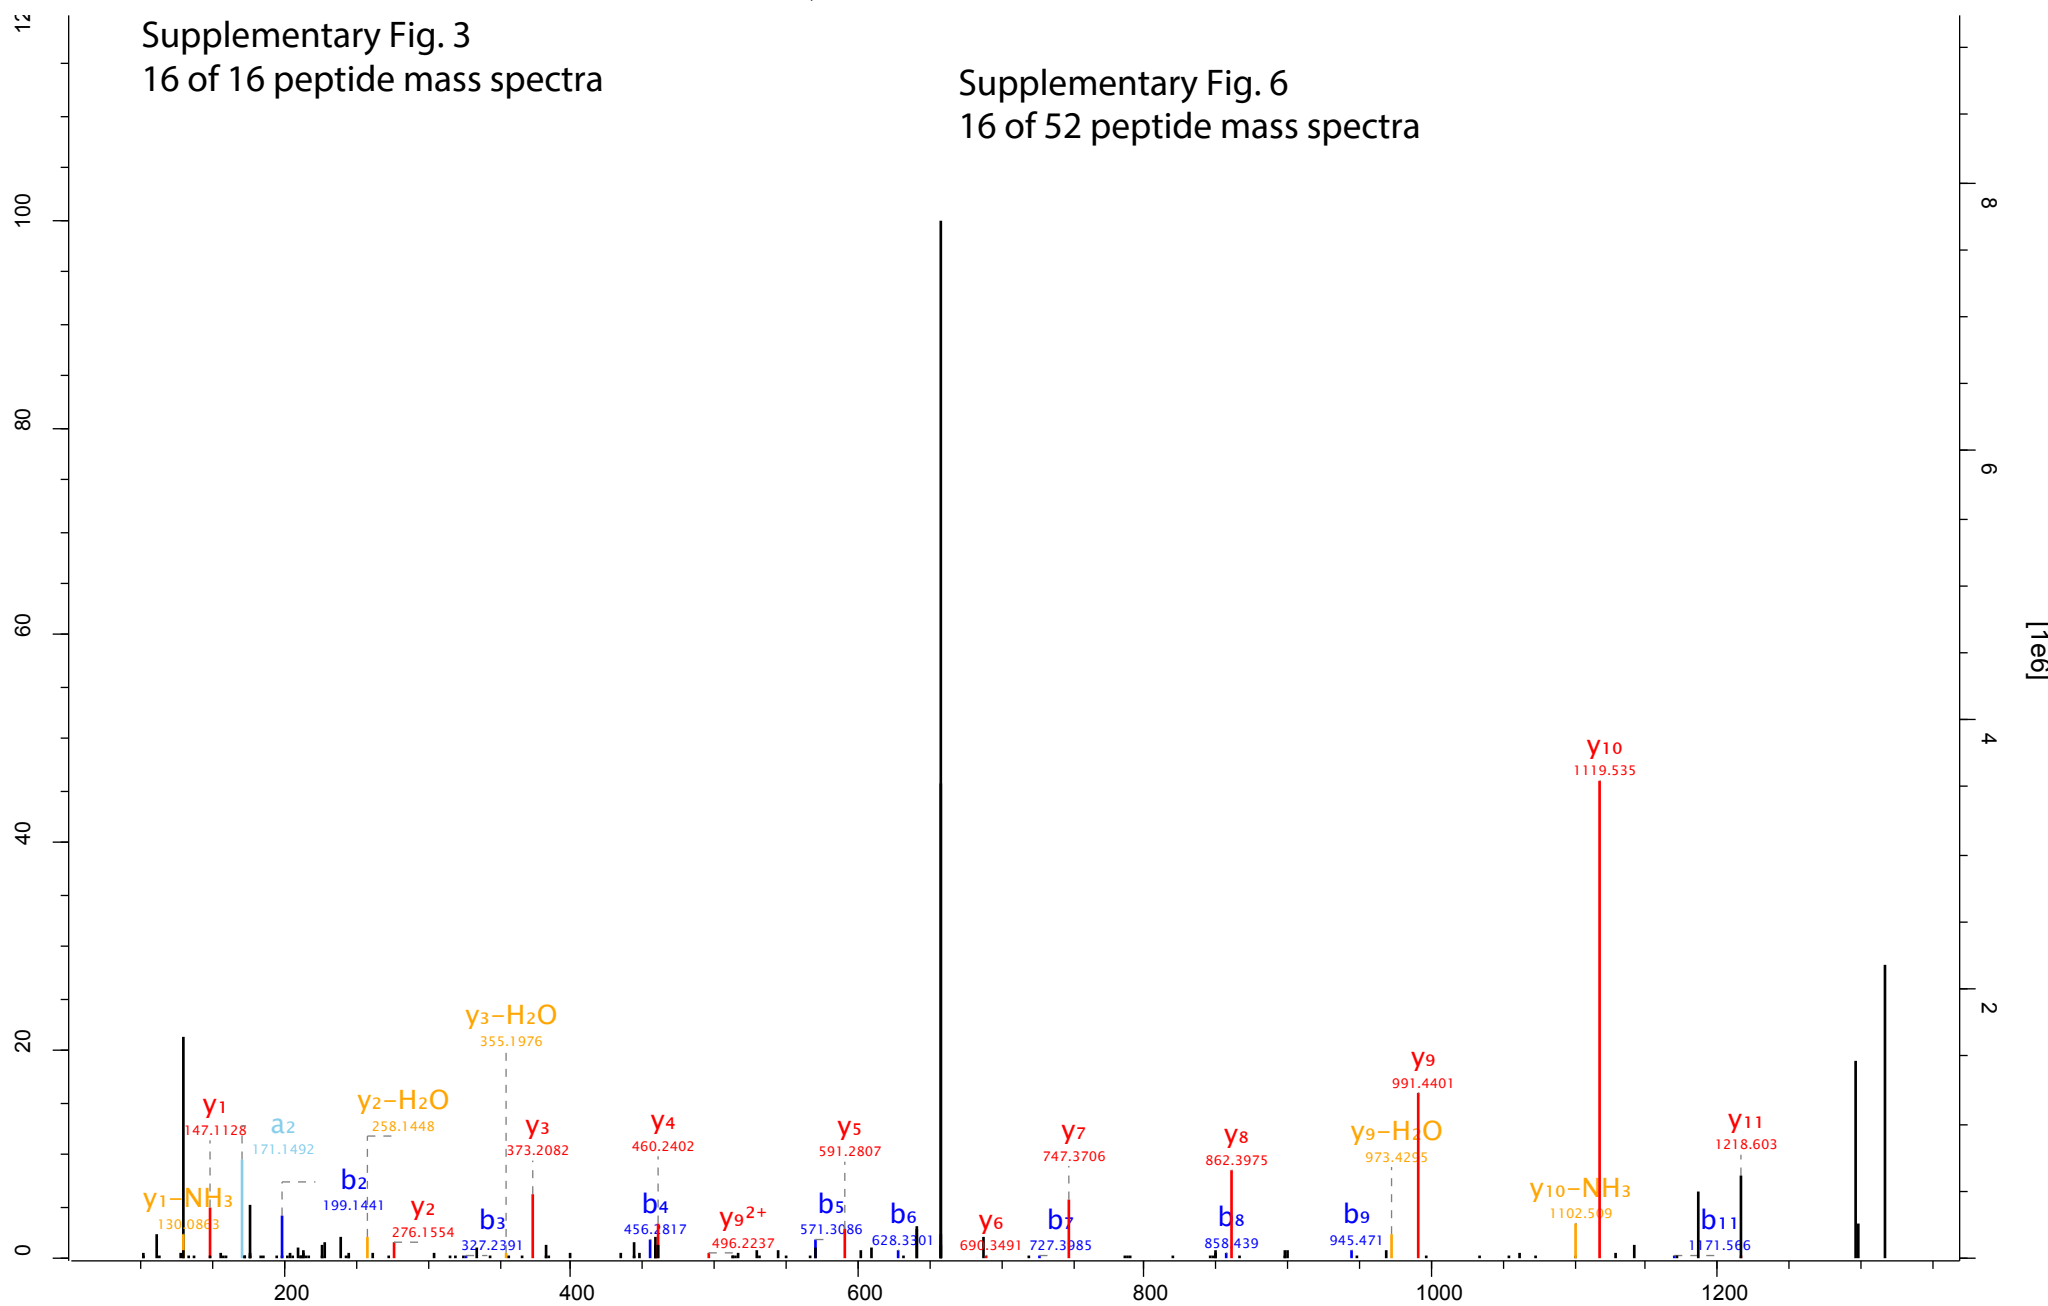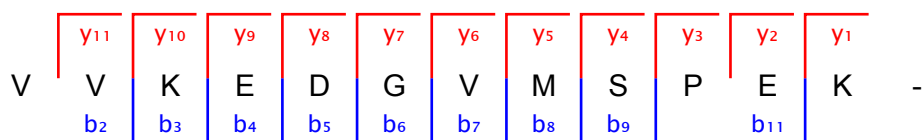

A.

MDLK\_EQPGNTVSSGQEDFPSVLFETAASLPSLSPLSTVSVFK\_EHGylGNLSAVASTEgTIEE  
TLNEASR\_ELPERATNPFVNRESAEFSVLEYSEMGSsfNGSPKGESAMLVENTKeeVIVR\_S  
KDKEDLVCSAALHNPQESpATLTK\_VVKEDGVMsPEK\_TMDIFNEMK\_MsVVAPVREEYAD  
FKPFEQAWEvK\_DTYEGSRDVLAArANMESKVDKkCFEDSLEQKSHGkdSESR\_NENASf  
PSTPELVK\_DGSRAYITCDSfTSATEStAANIFPVLEDHTSENKTDEKKIEERKAQIIITEKTSP  
KTSNPFLVAIHdSEADYVTTDNLSKVTEAVVATMPEGLTPDLVQeACESELNEATGTKIA  
YETKVDLVQTSerAIQESIYPTAQLCPSFEeAEATPSPVLPDIVMEAPLNsLLPSTGASVAQP  
SASPLeVSPVSYDGIK\_LEPENPPPYYEEAMsVALK\_TSDAK\_EEIKEPESfNAAVQeAEAPYIS  
IACDLIK\_ETK\_LSTEPSPEFSNYSEIAK\_FEKSVPDHCELVDdSSPESEPVDFsDDSIpDVPQT  
QEEAVMLMK\_ESLTEVSETVTQHK\_HKERLSASPQEVGKPYLESfQPNLHITKDAASNEIPT  
LTKKETISLQMEEFNTAIYSNDDLLSSKEDKMKESeTfSDSSPIEIIDeFPTfVSAKDDSPK\_  
EYTDLEVSnk\_SEIANVQSGANSLPCSELPCDLsFK\_NTYPK\_DEAHVSDEFSK\_SRSSVSK\_VPLLL  
PNVSALESQIEMGNIVKPK\_VLTKEAEeKLPsDTEKEDRSLTAVLSAElnKTSDETLfALP  
AASEPVIPSSAEKI

B.

MDLK.EQPGNTVSSGQEDFPSVLFETAASLPSLSPLSTVSVFK\_EHGylGNLSAVASTEgTIEE  
TLNEASR\_ELPER\_ATNPFVNR\_ESAEFSVLEYSEMGSsfNGSPK\_GESAMLVENTK.EEVIVR\_S  
K.DKEDLVCSAALHNPQESpATLTK\_VVK.EDGVMsPEK\_TMDIFNEMK\_MsVVAPVR.EEYAD  
FKPFEQAWEvK.DTYEGSR.DVLAAR\_ANMESKVDKk\_CFEDSLEQK\_SHGK.DSESR.NENASf  
PSTPELVK.DGSR\_AYITCDSfTSATEStAANIFPVLEDHTSENKTDEK.K\_IIEER\_KAQIIITEKTSP  
K\_TSNPFLVAIHdSEADYVTTDNLSK\_VTEAVVATMPEGLTPDLVQeACESELNEATGTK\_IA  
YETKVDLVQTSerAIQESIYPTAQLCPSFEeAEATPSPVLPDIVMEAPLNsLLPSTGASVAQP  
SASPLeVSPVSYDGIK\_LEPENPPPYYEEAMsVALK\_TSDAK\_EEIKEPESfNAAVQeAEAPYIS  
IACDLIK.ETK\_LSTEPSPEFSNYSEIAK.FEK\_SVPDHCELVDdSSPESEPVDFsDDSIpDVPQT  
QEEAVMLMK\_ESLTEVSETVTQHK\_HKERLSASPQEVGKPYLESfQPNLHITK\_DAASNEIPT  
LTK.K\_ETISLQMEEFNTAIYSNDDLLSSK.EDK\_MK.ESETfSDSSPIEIIDeFPTfVSAK.DDSPK\_  
EYTDLEVSnk\_SEIANVQSGANSLPCSELPCDLsFK\_NTYPK.DEAHVSDEFSK\_SRSSVSK\_VPLLL  
PNVSALESQIEMGNIVK.PK\_VLTK\_EAEeK.LPSDTEKEDR\_SLTAVLSAElnK\_TSDETLfALP  
AASEPVIPdykdddkppSSAEK\_I

#### Supplementary Fig. 4 Tryptic peptides identified by mass spectrometry.

A, B. Peptides derived from construct circRtn4 and from circRtn4-FLAG are shown in red and blue, respectively. For mass spectrograms, see Supplementary Figs. 3 and 6, respectively. The amino acids contributed by the FLAG sequence are in lower case. The glutamic acid residue (E) contributed by the splice site between exons 2 and 3 (last row) and the aspartic acid residue (D) at the site of circularization (penultimate row) are shown in bold.

Complete digestion is marked by an underline symbol and observed incomplete digestion yielding two or more overlapping products is marked by a dot, i.e., there were additional sequences (N-terminally and/or C-terminally) in identified peptides beyond the dots.



**Supplementary Fig. 6**

**52 mass spectra of the tryptic peptides from circRtn4-FLAG derived protein**

The left coordinate is the relative intensity, the right coordinate is the absolute intensity, the horizontal coordinate is  $m/z$ .

Supplementary Fig. 6  
1 of 52 peptide mass spectra

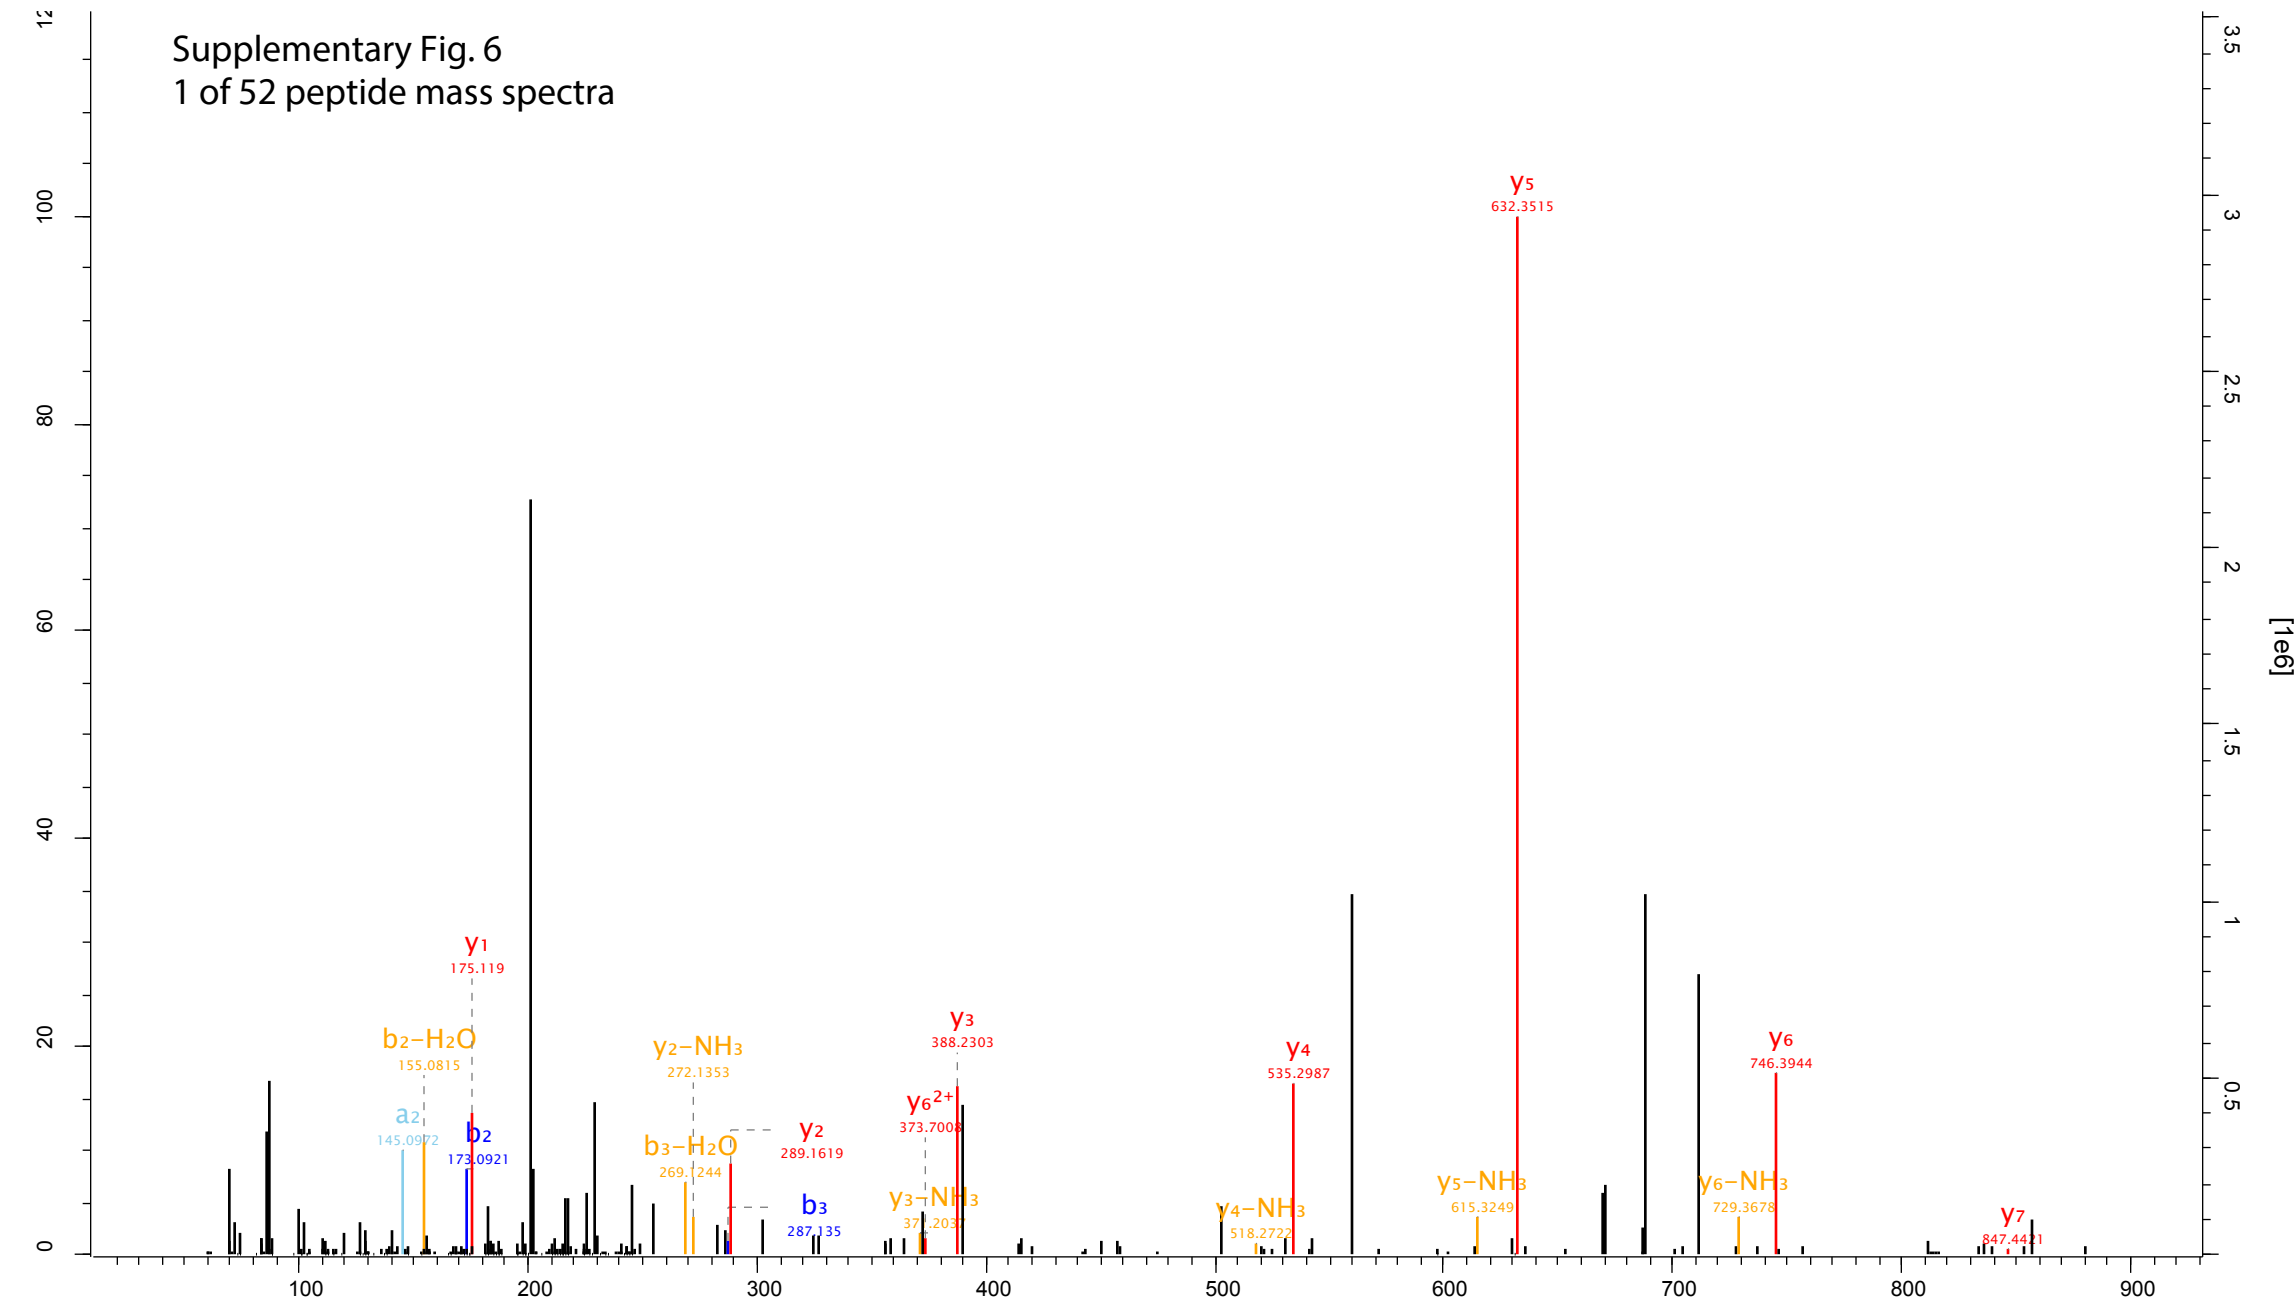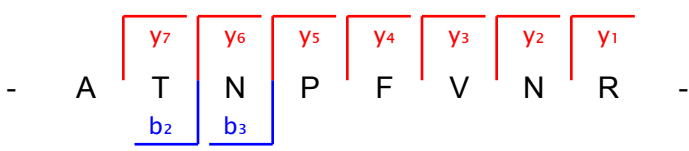

Supplementary Fig. 6  
 2 of 52 peptide mass spectra

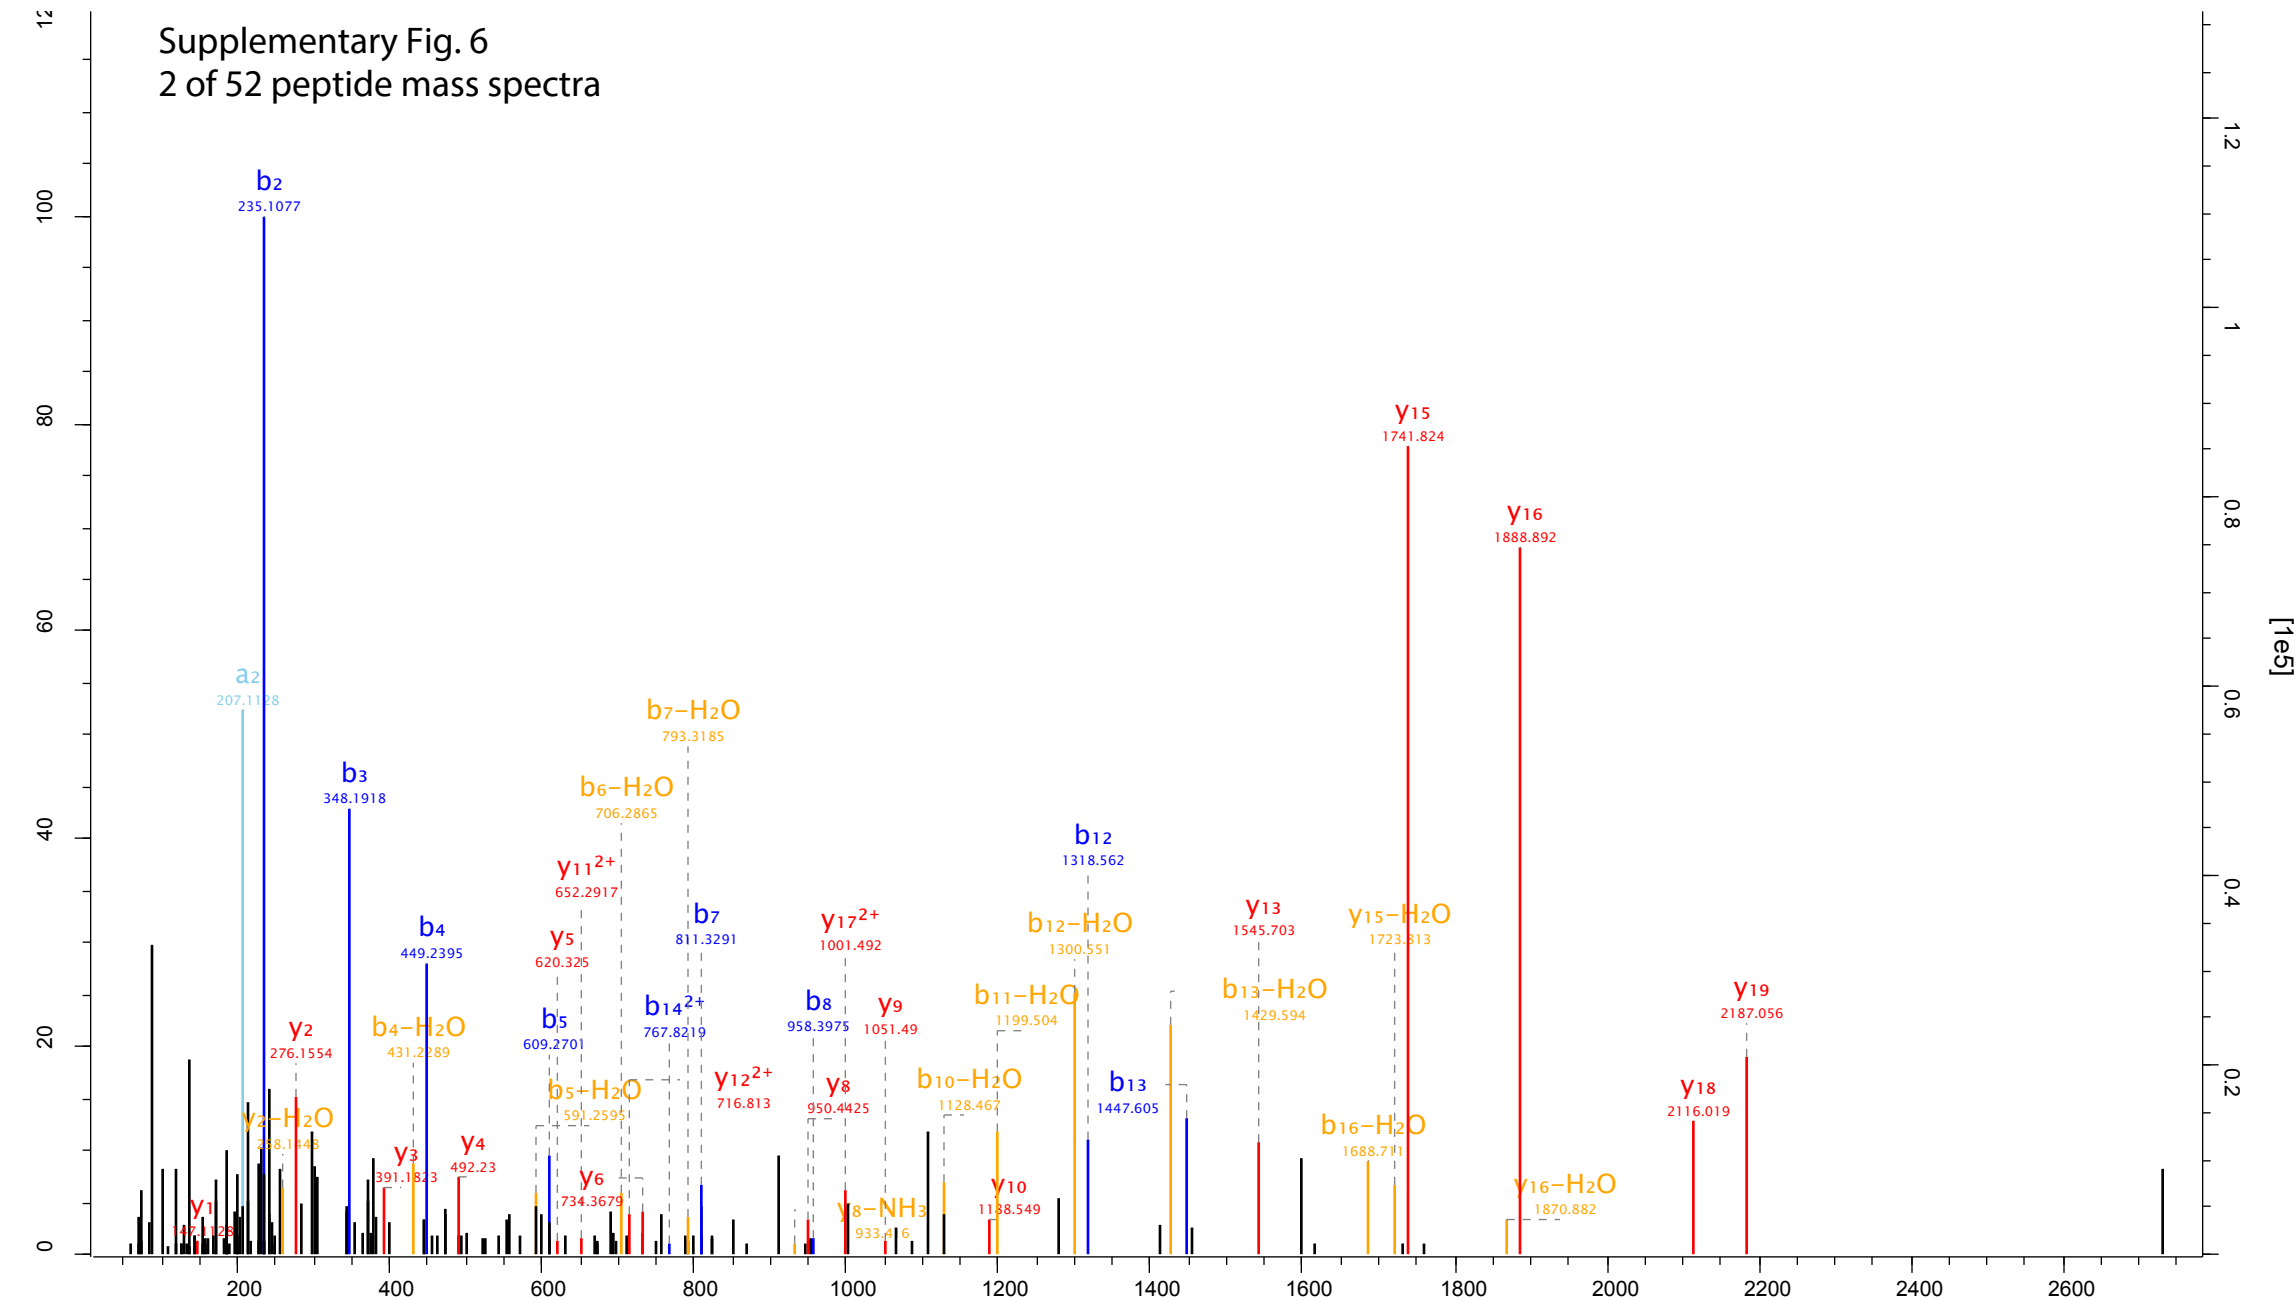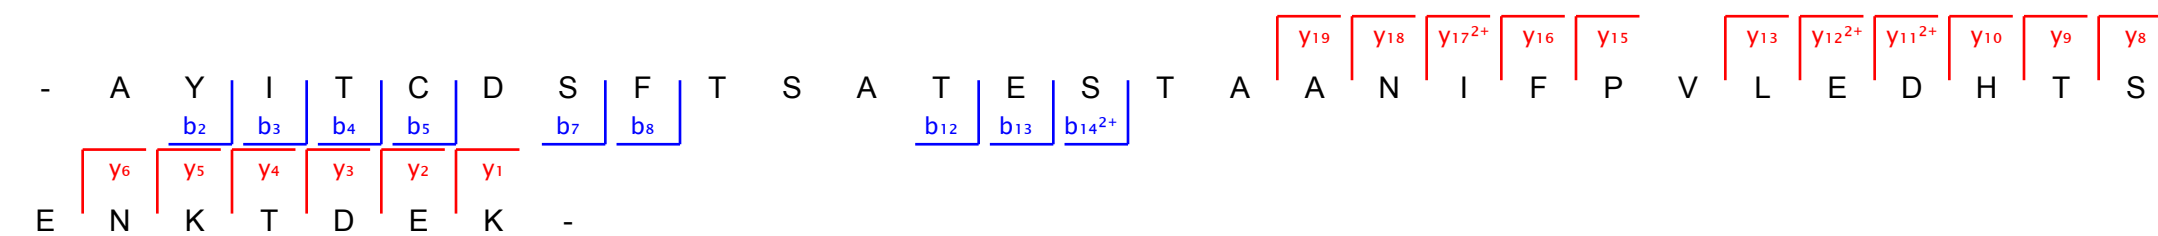

Supplementary Fig. 6  
3 of 52 peptide mass spectra

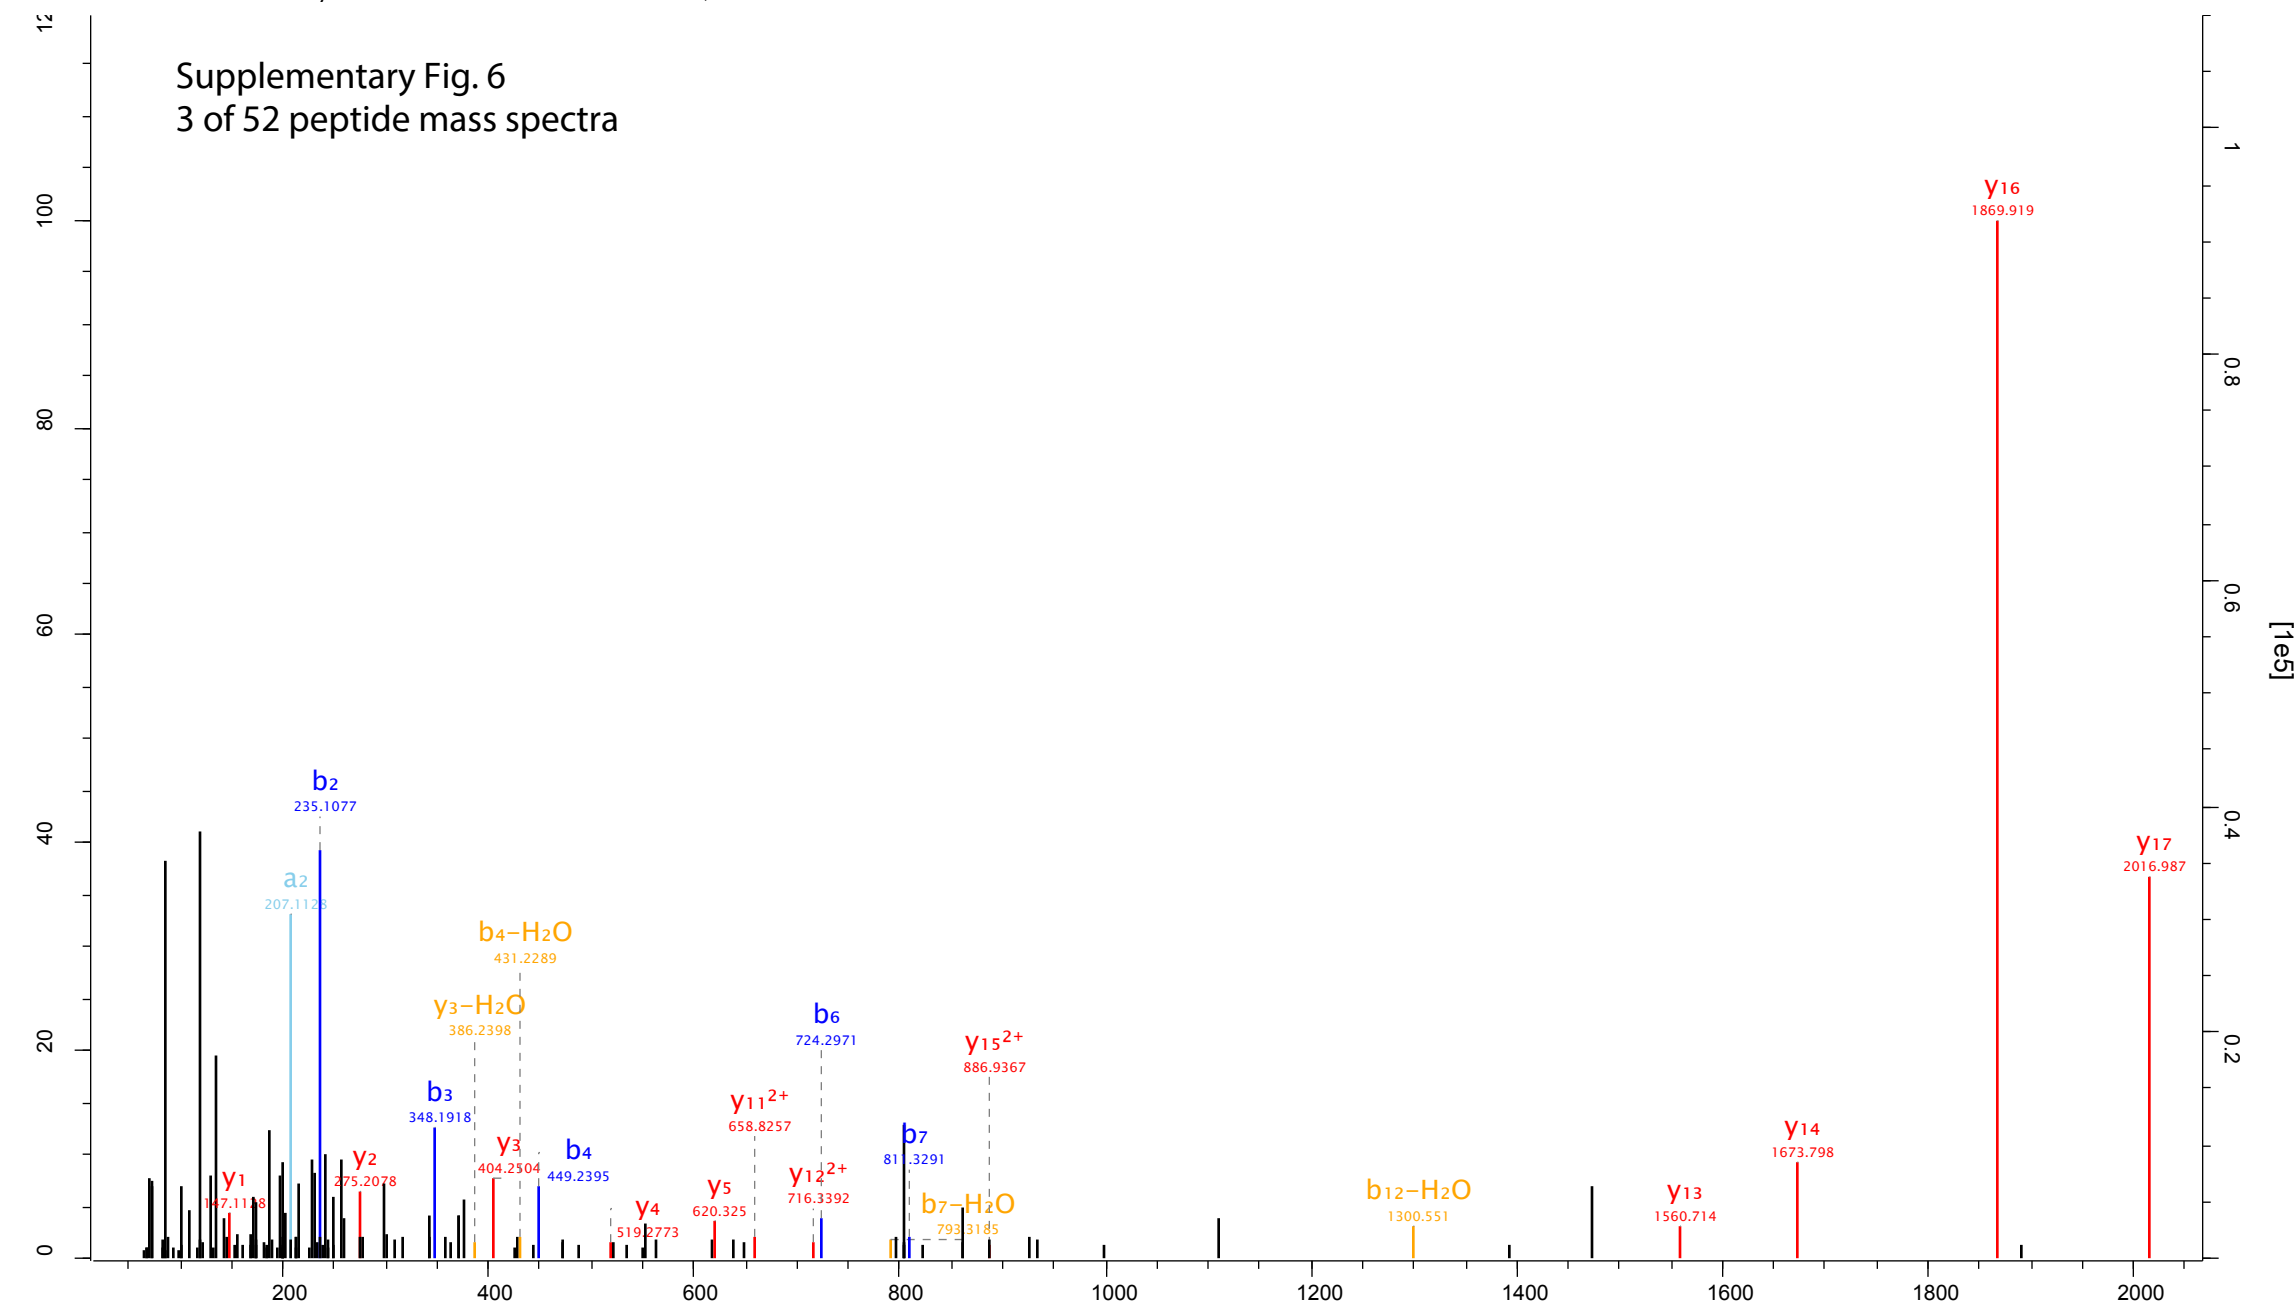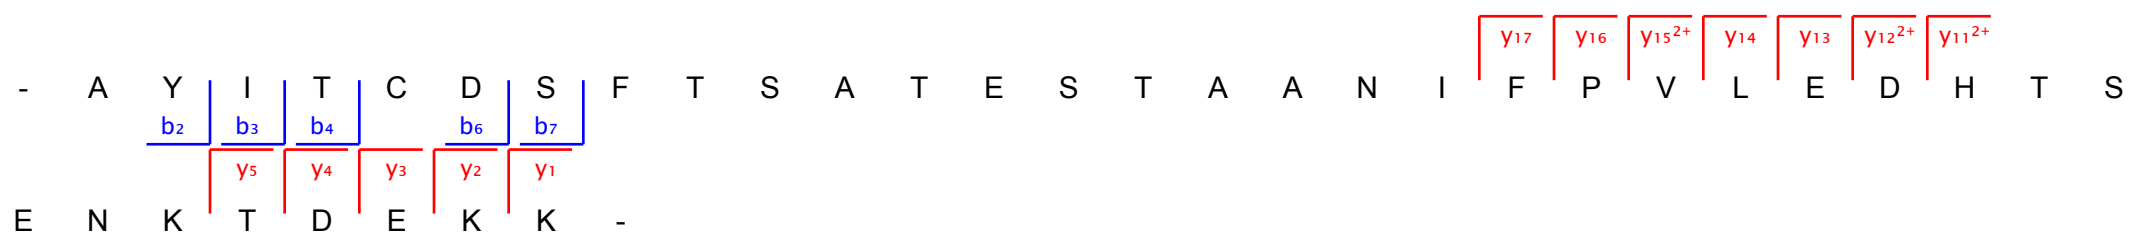

Supplementary Fig. 6  
4 of 52 peptide mass spectra

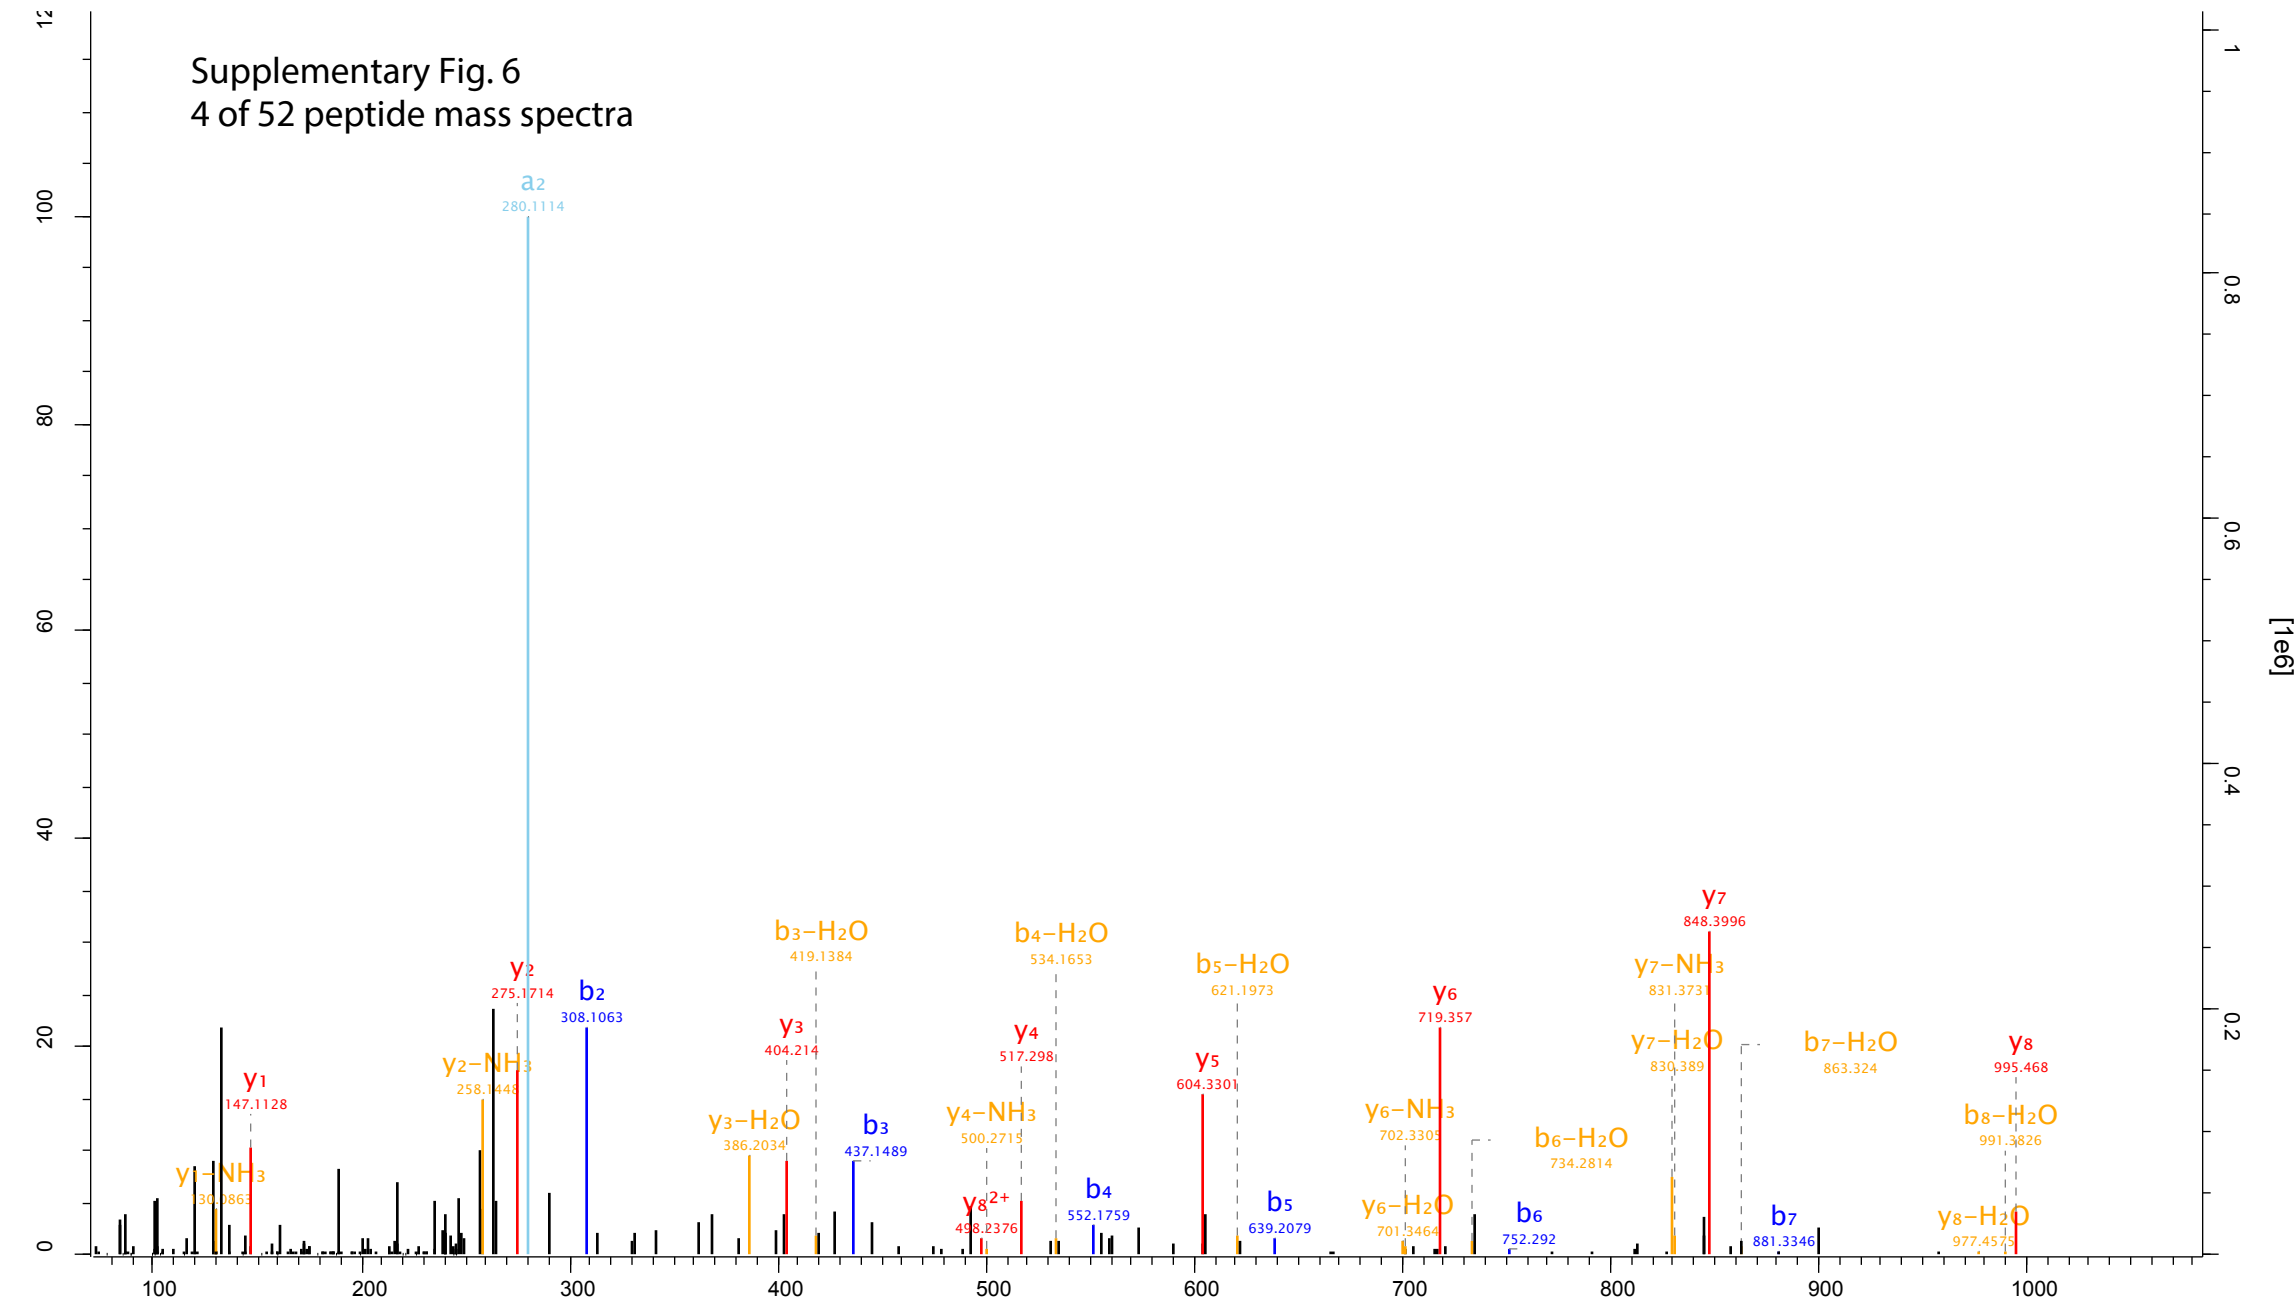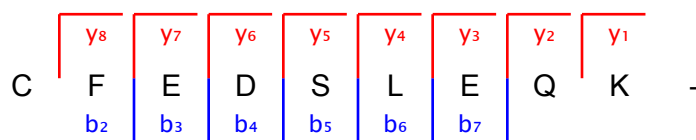



Supplementary Fig. 6  
5 of 52 peptide mass spectra

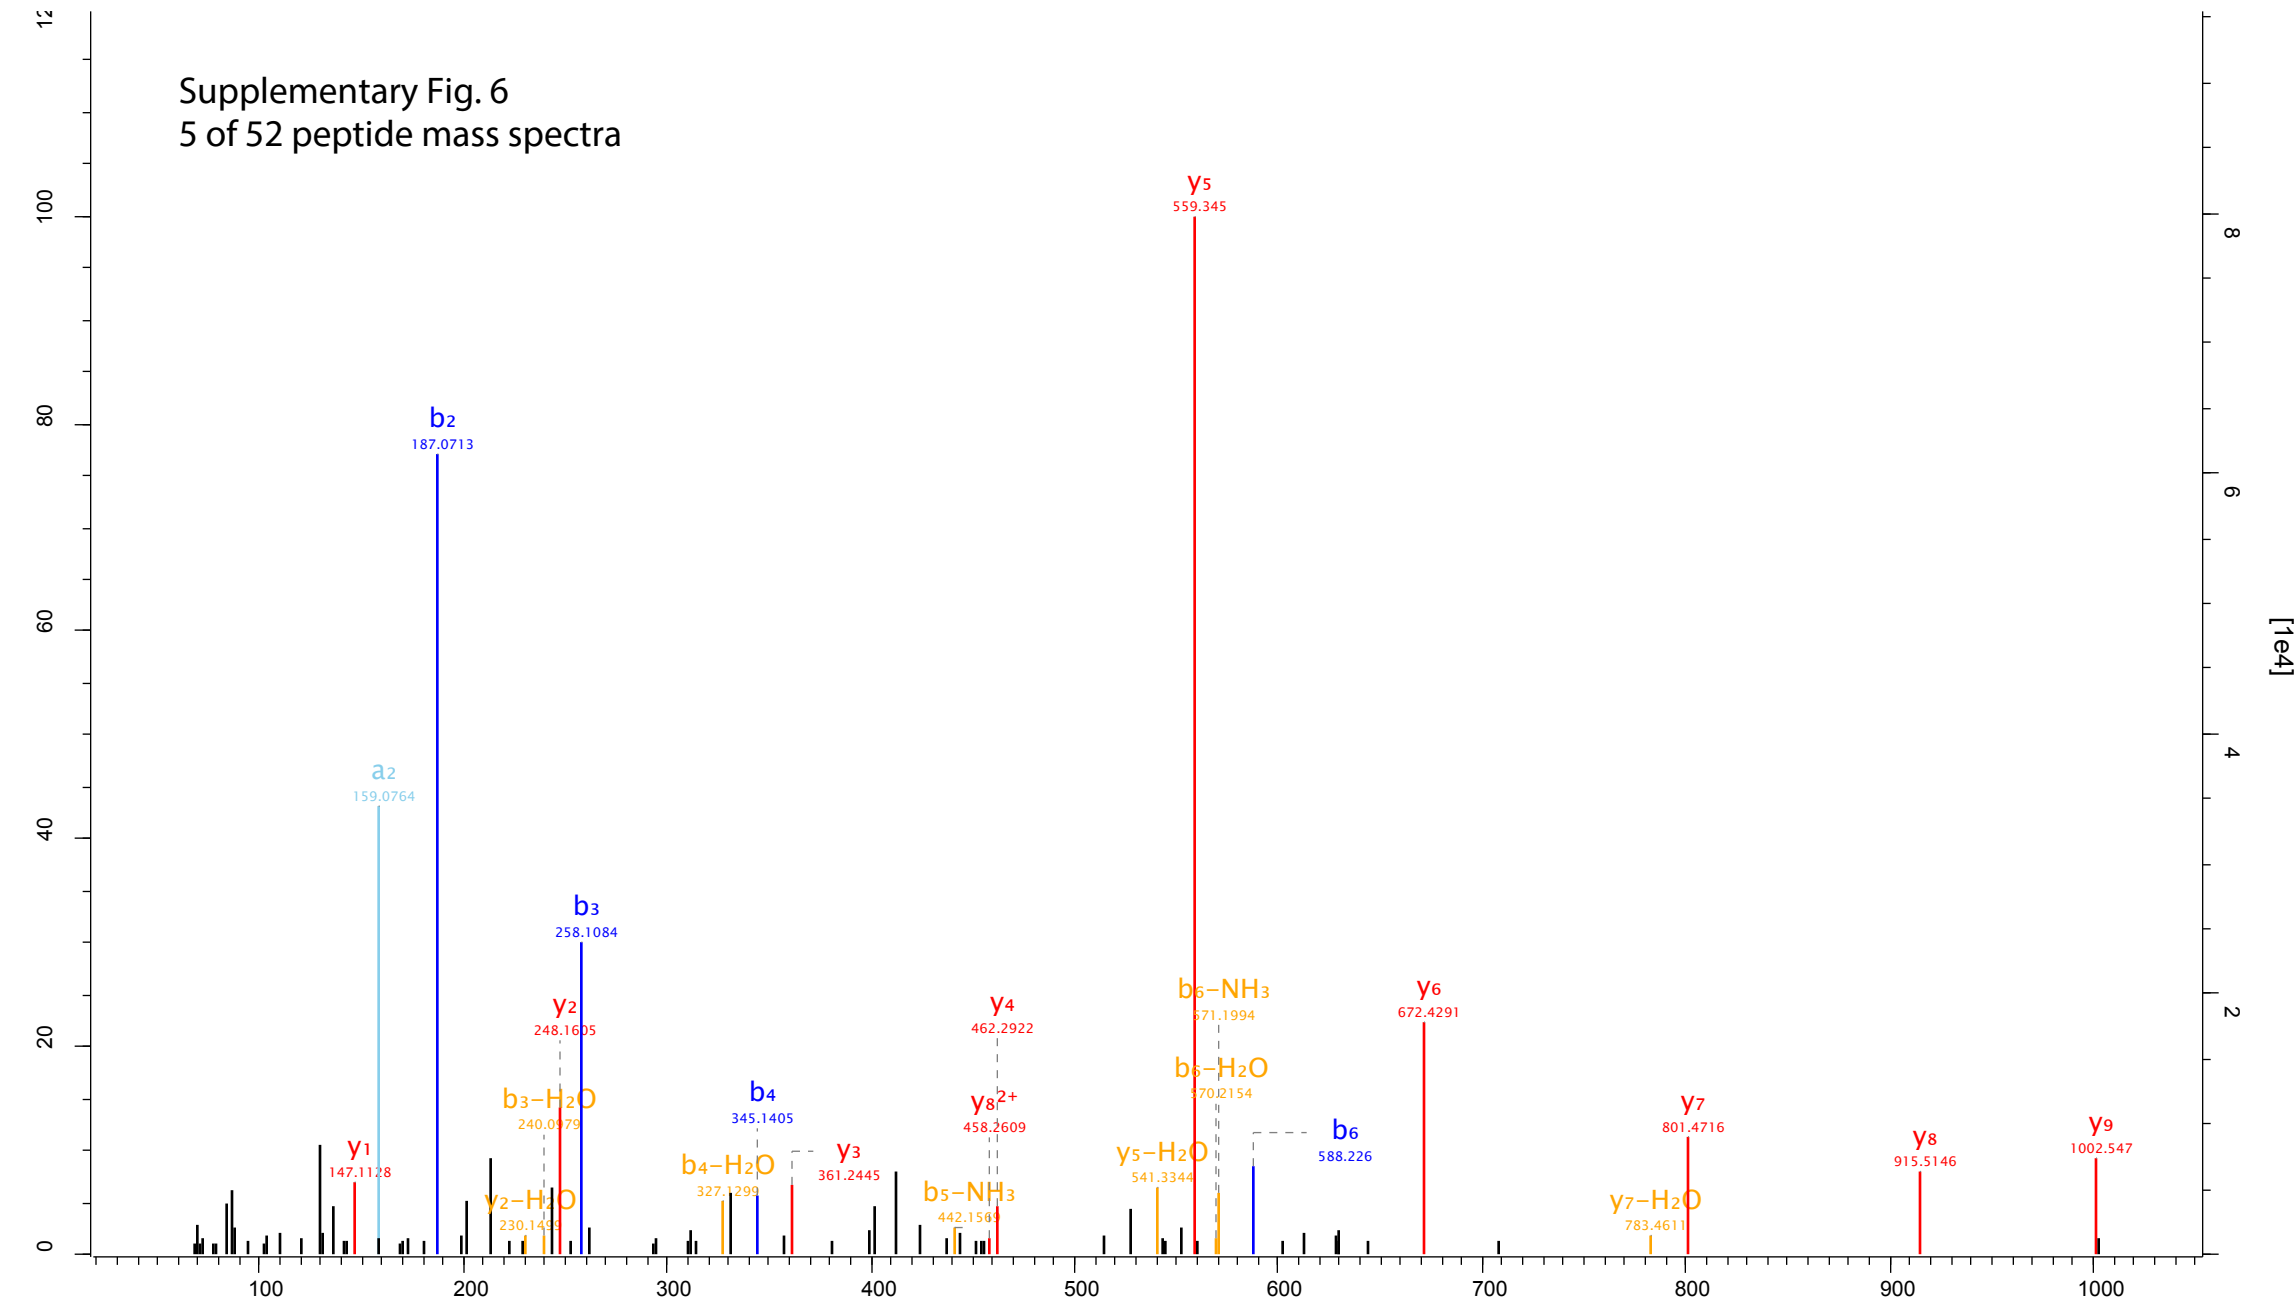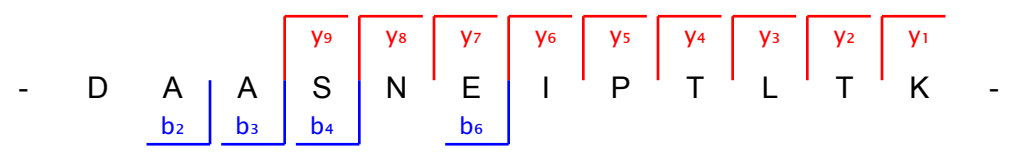

Supplementary Fig. 6  
6 of 52 peptide mass spectra

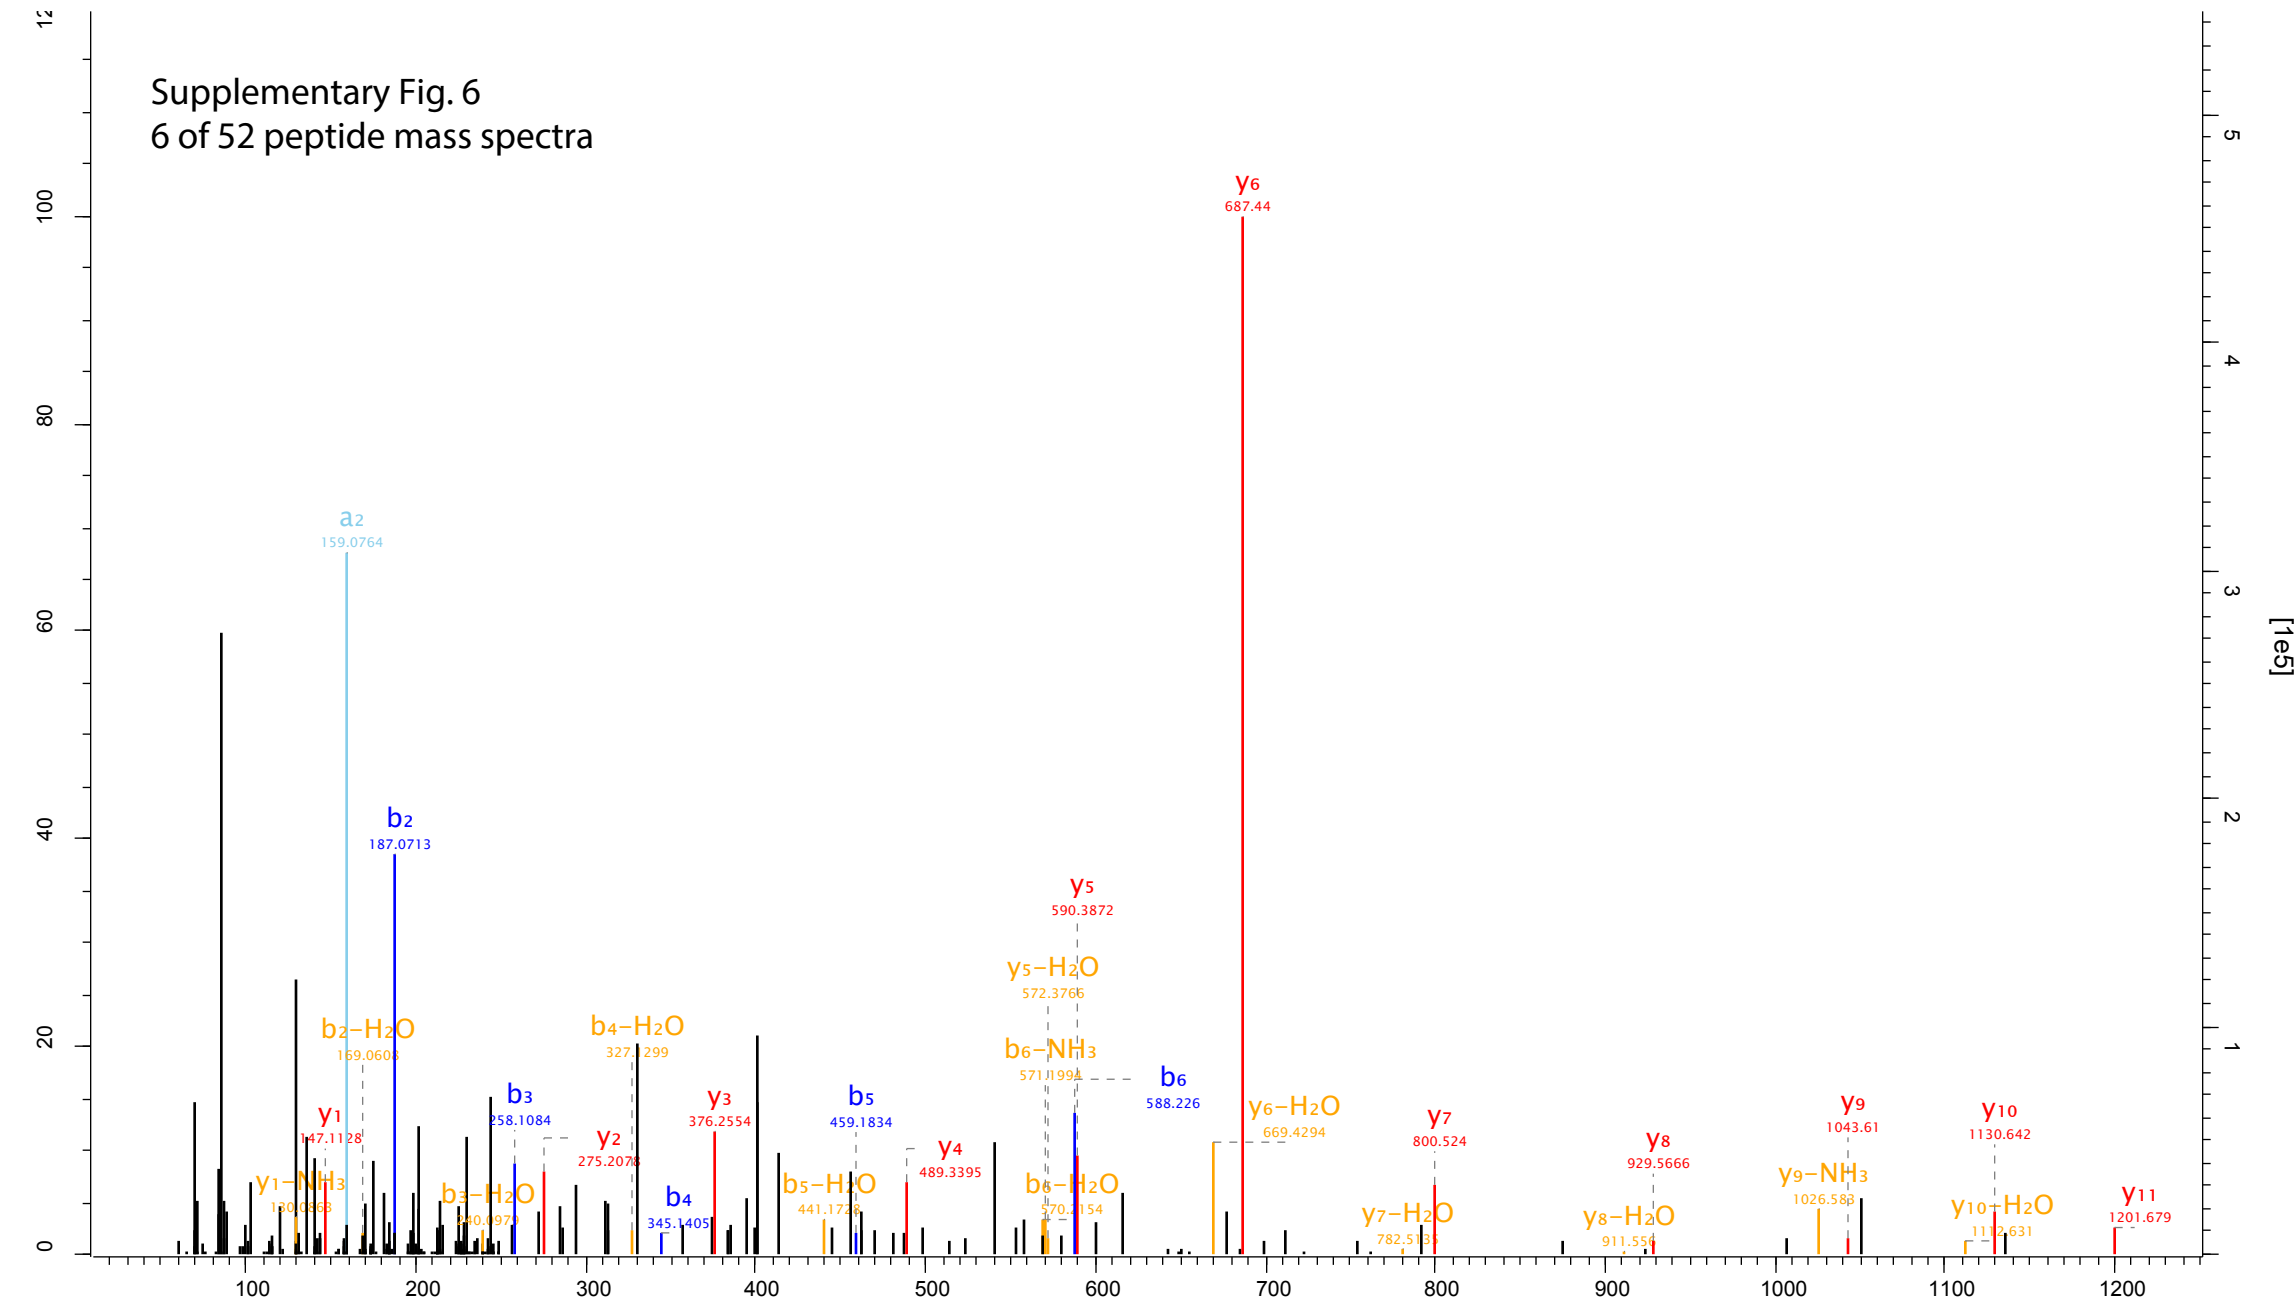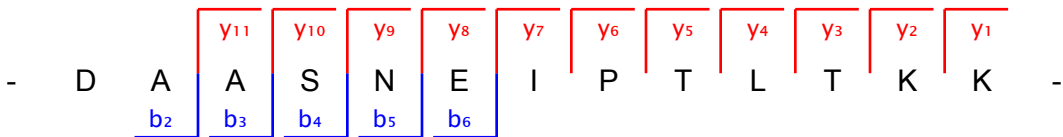

Supplementary Fig. 6  
7 of 52 peptide mass spectra

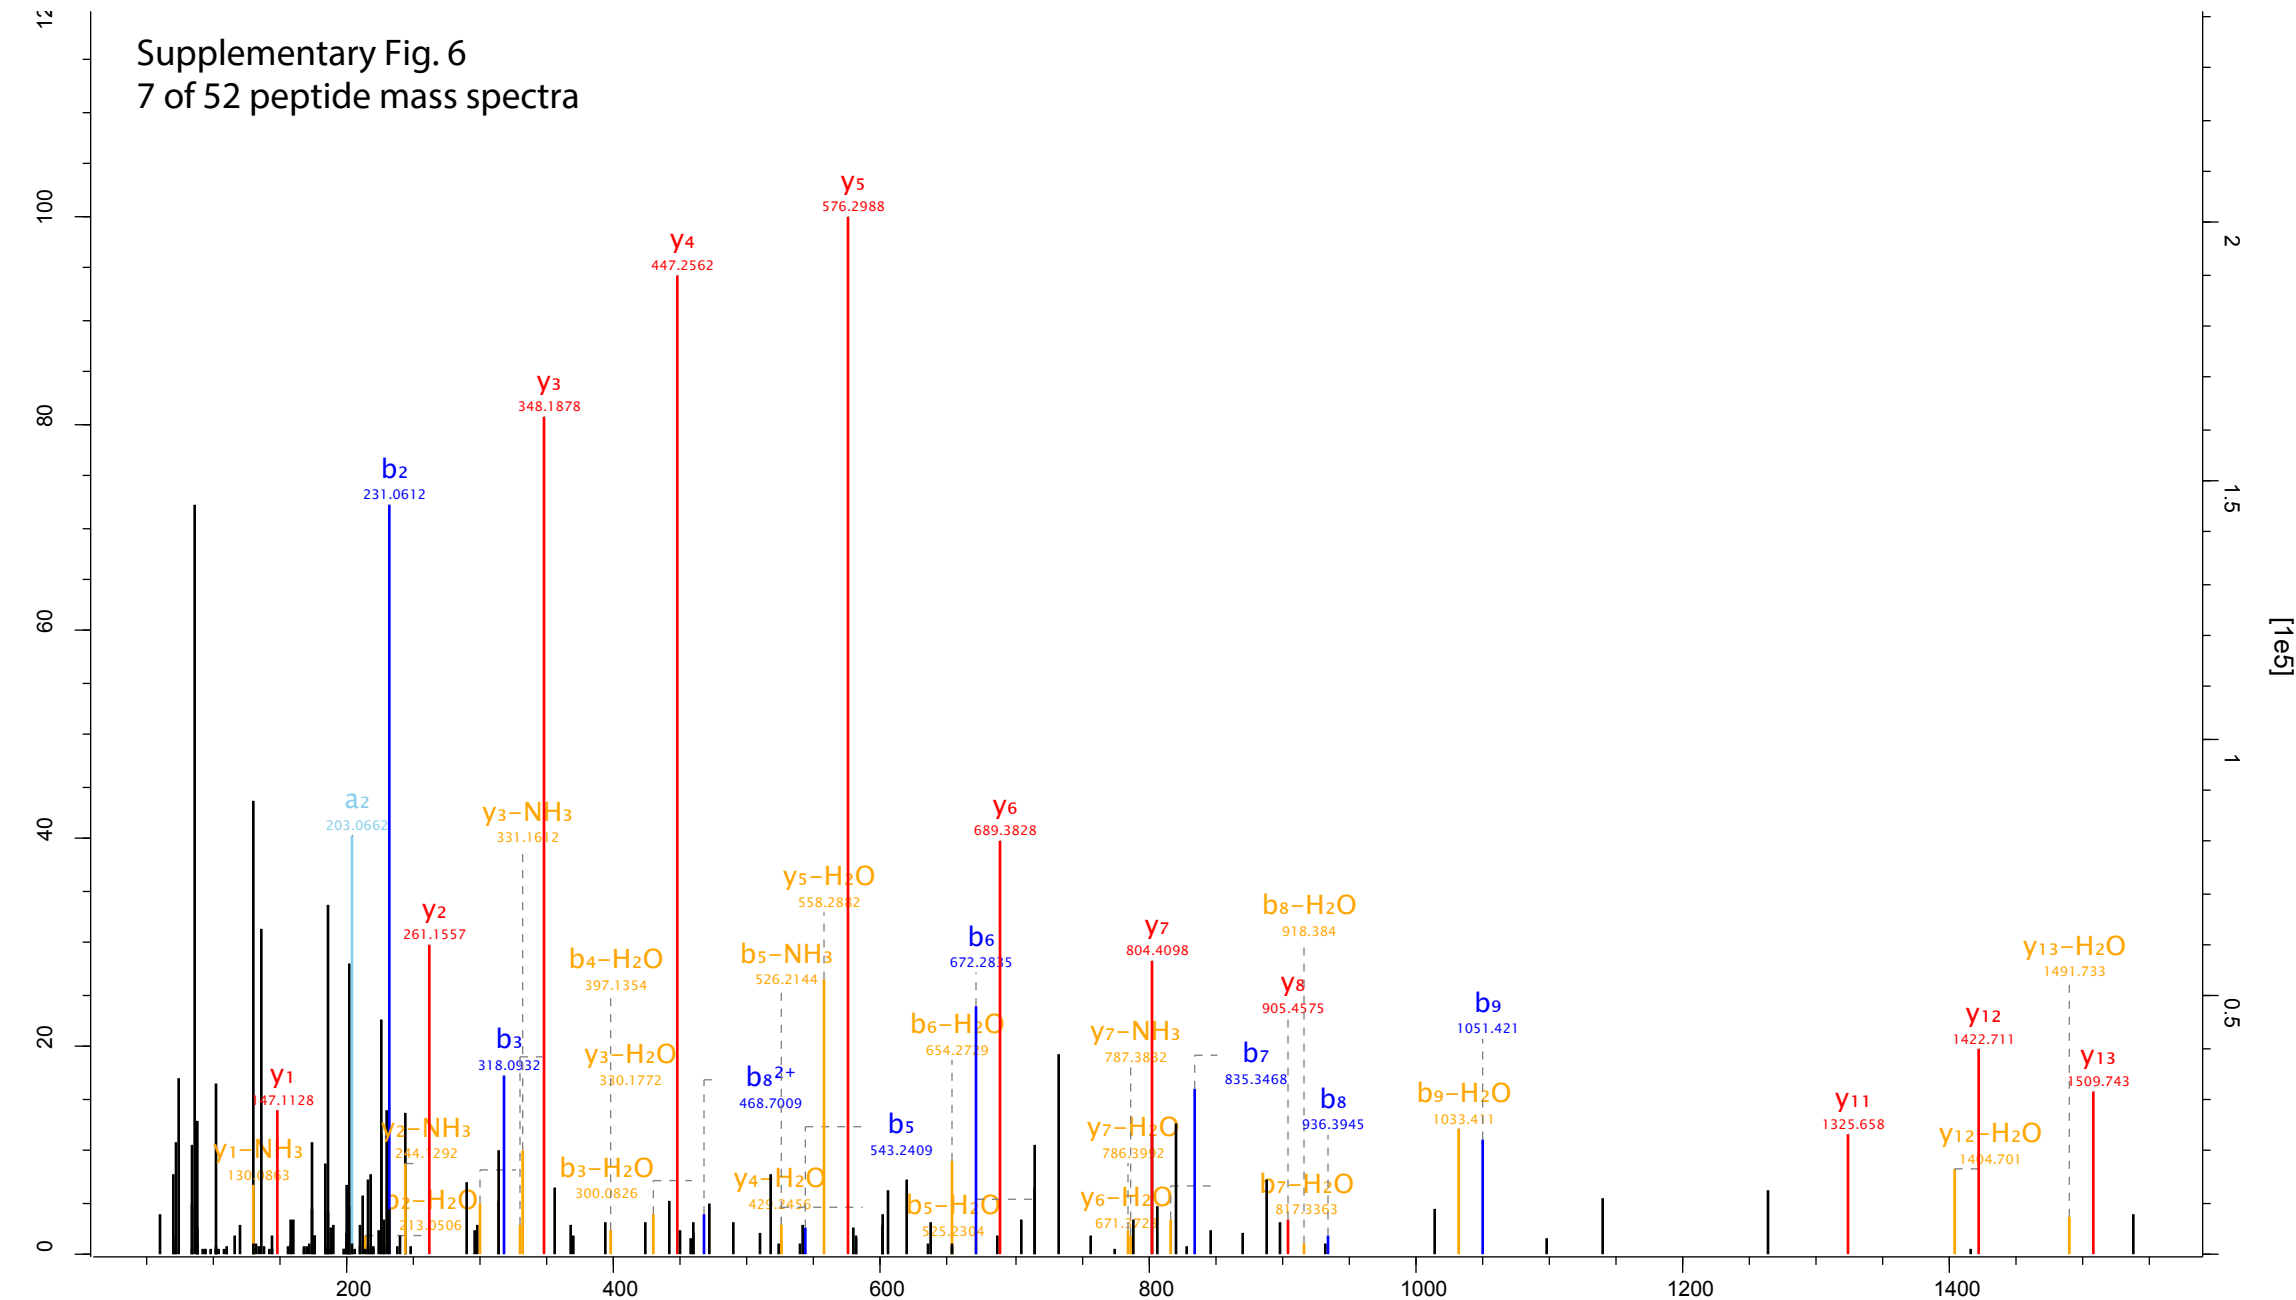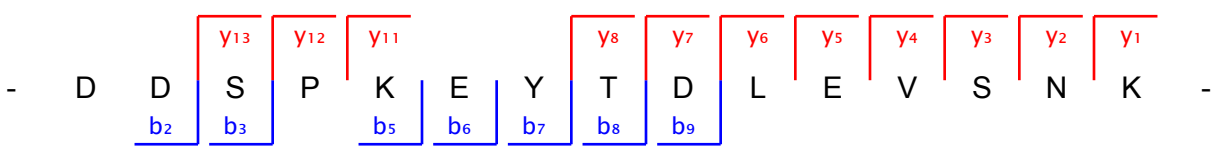

Supplementary Fig. 6  
8 of 52 peptide mass spectra

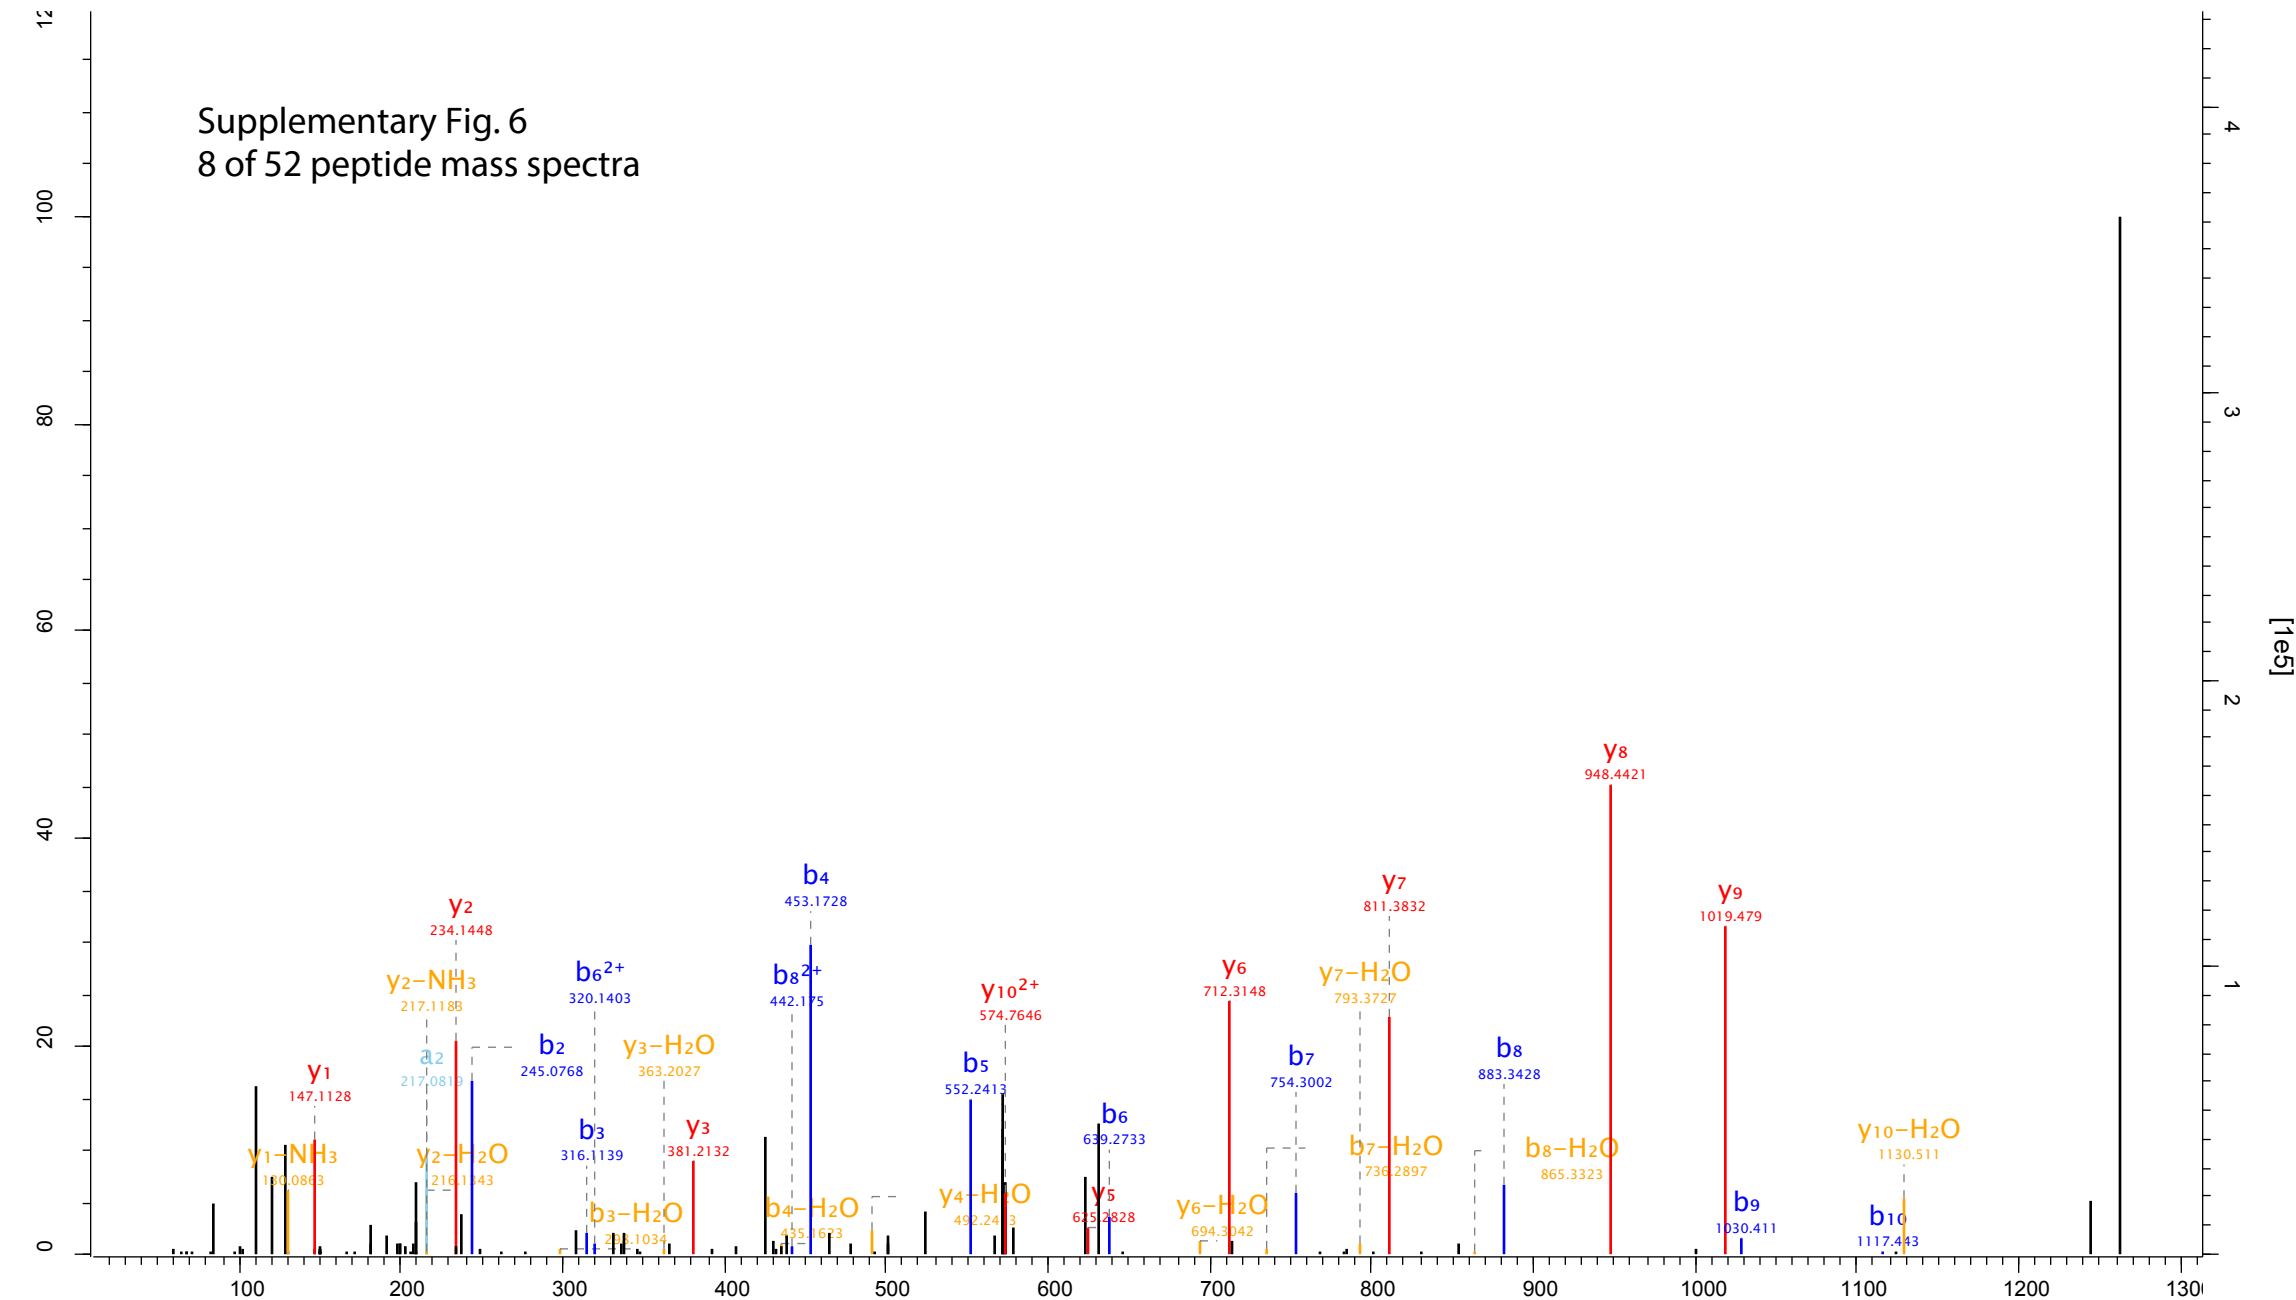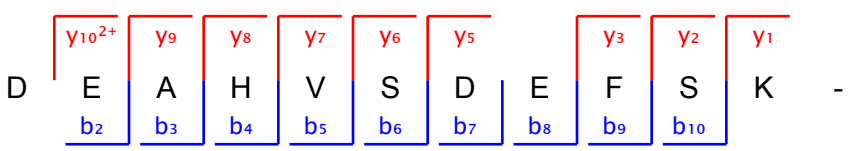

Supplementary Fig. 6  
9 of 52 peptide mass spectra

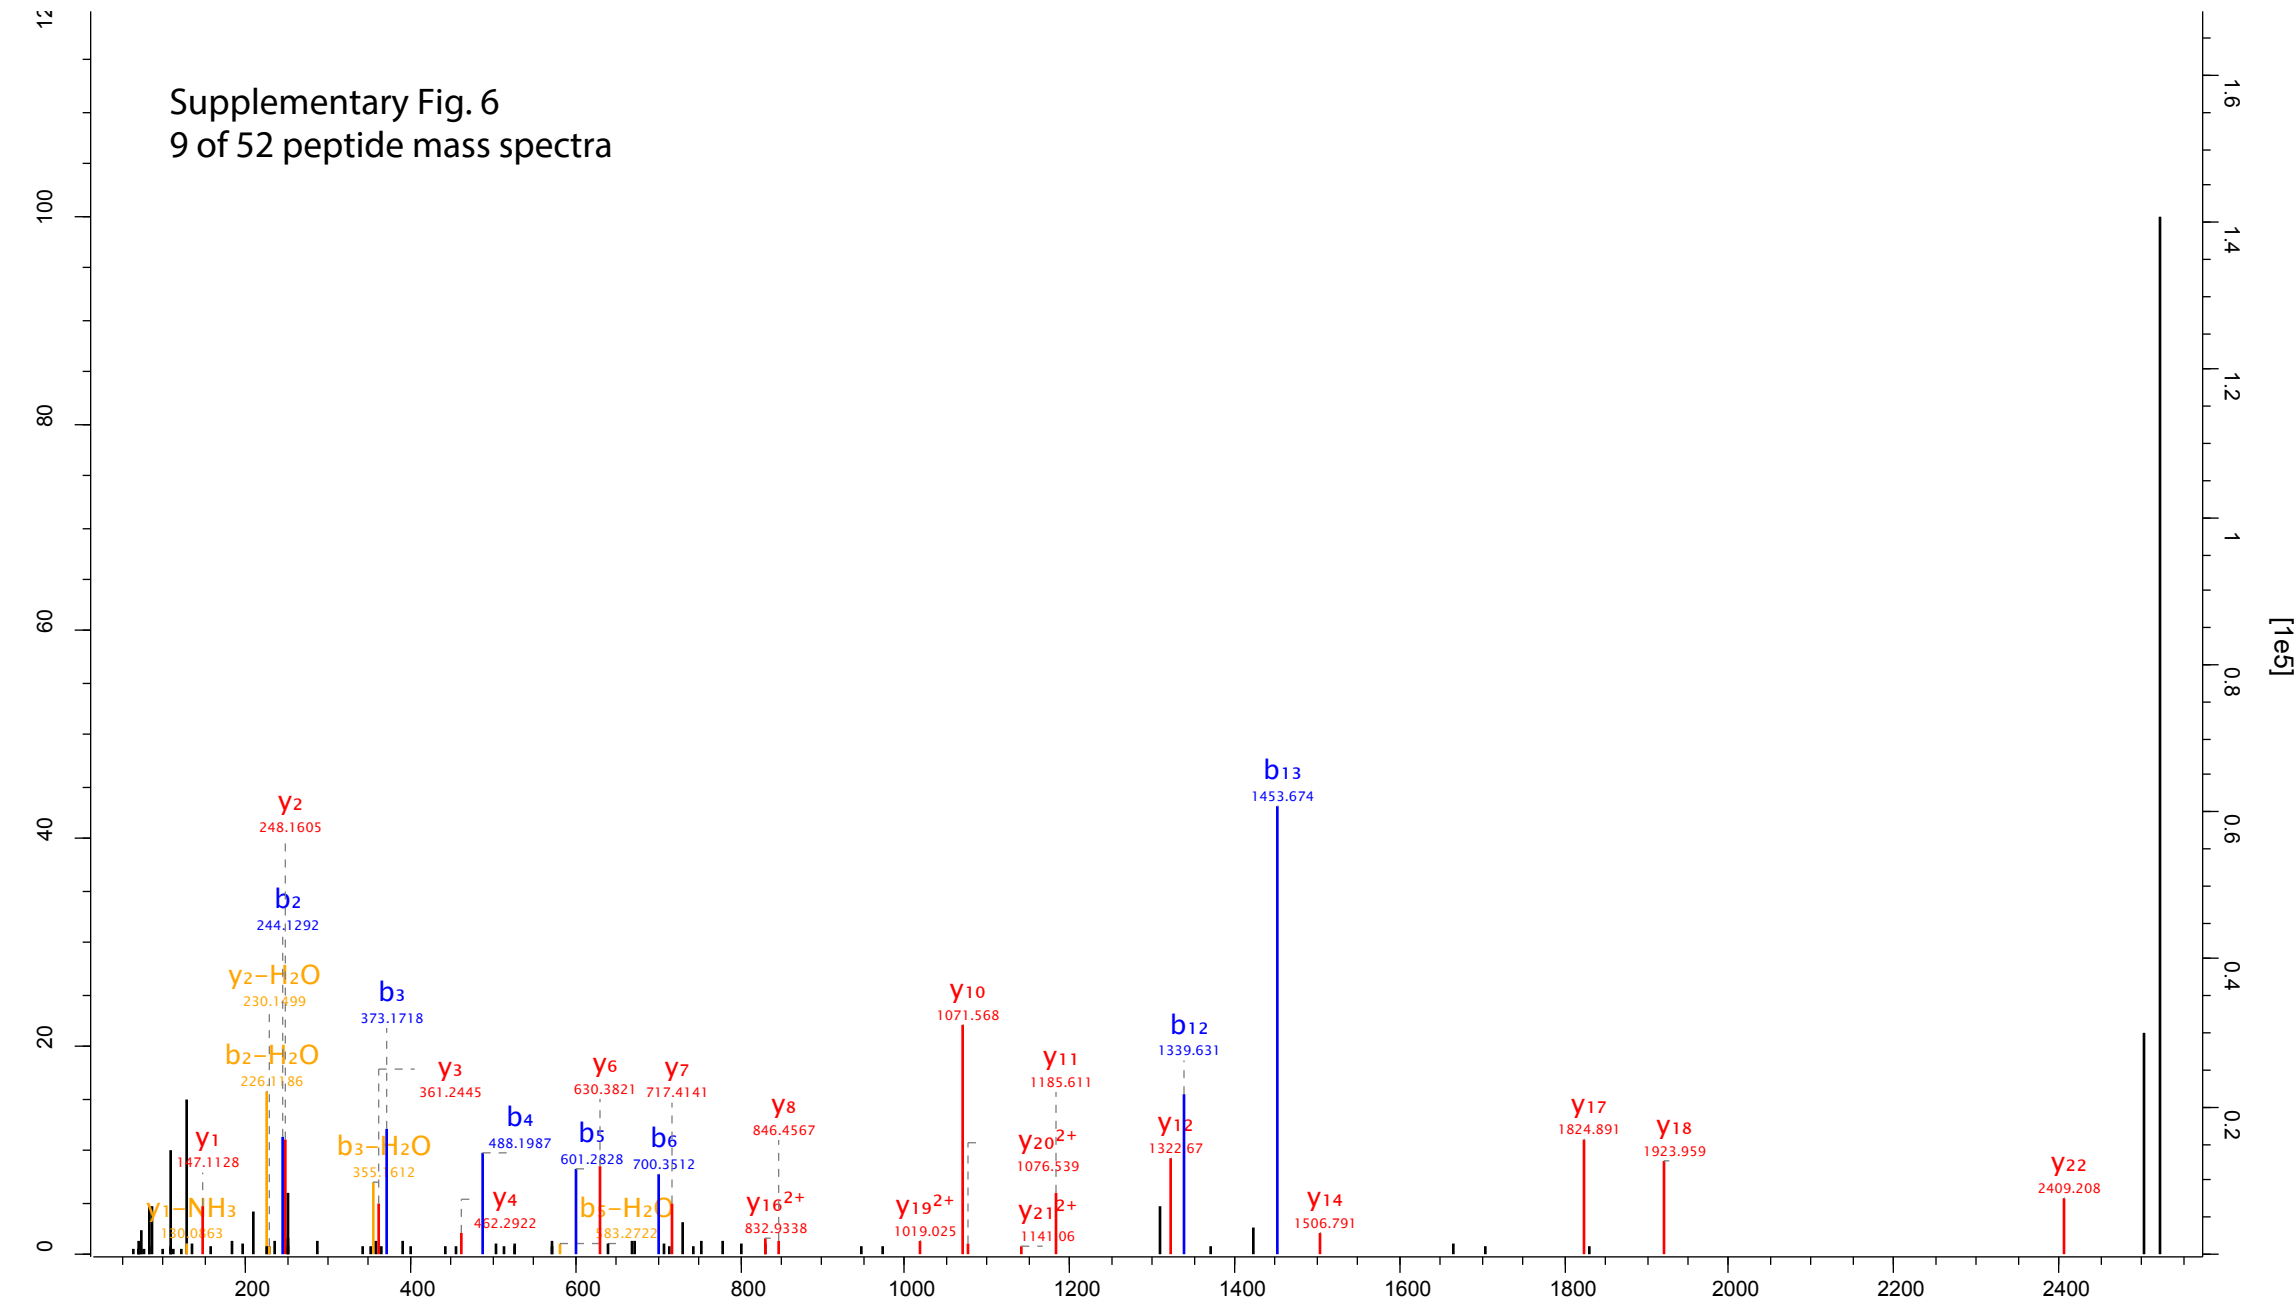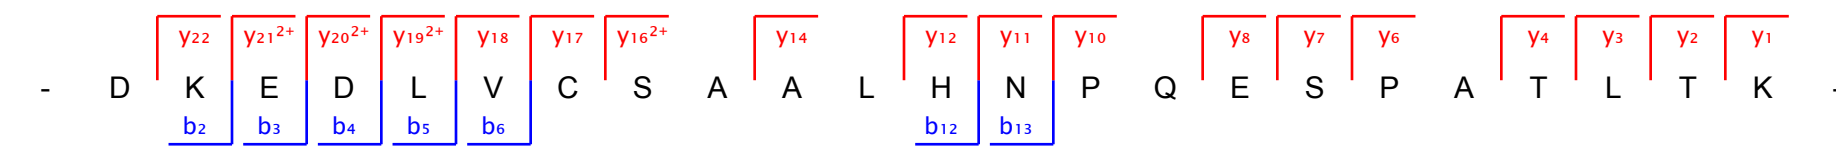

Supplementary Fig. 6  
10 of 52 peptide mass spectra

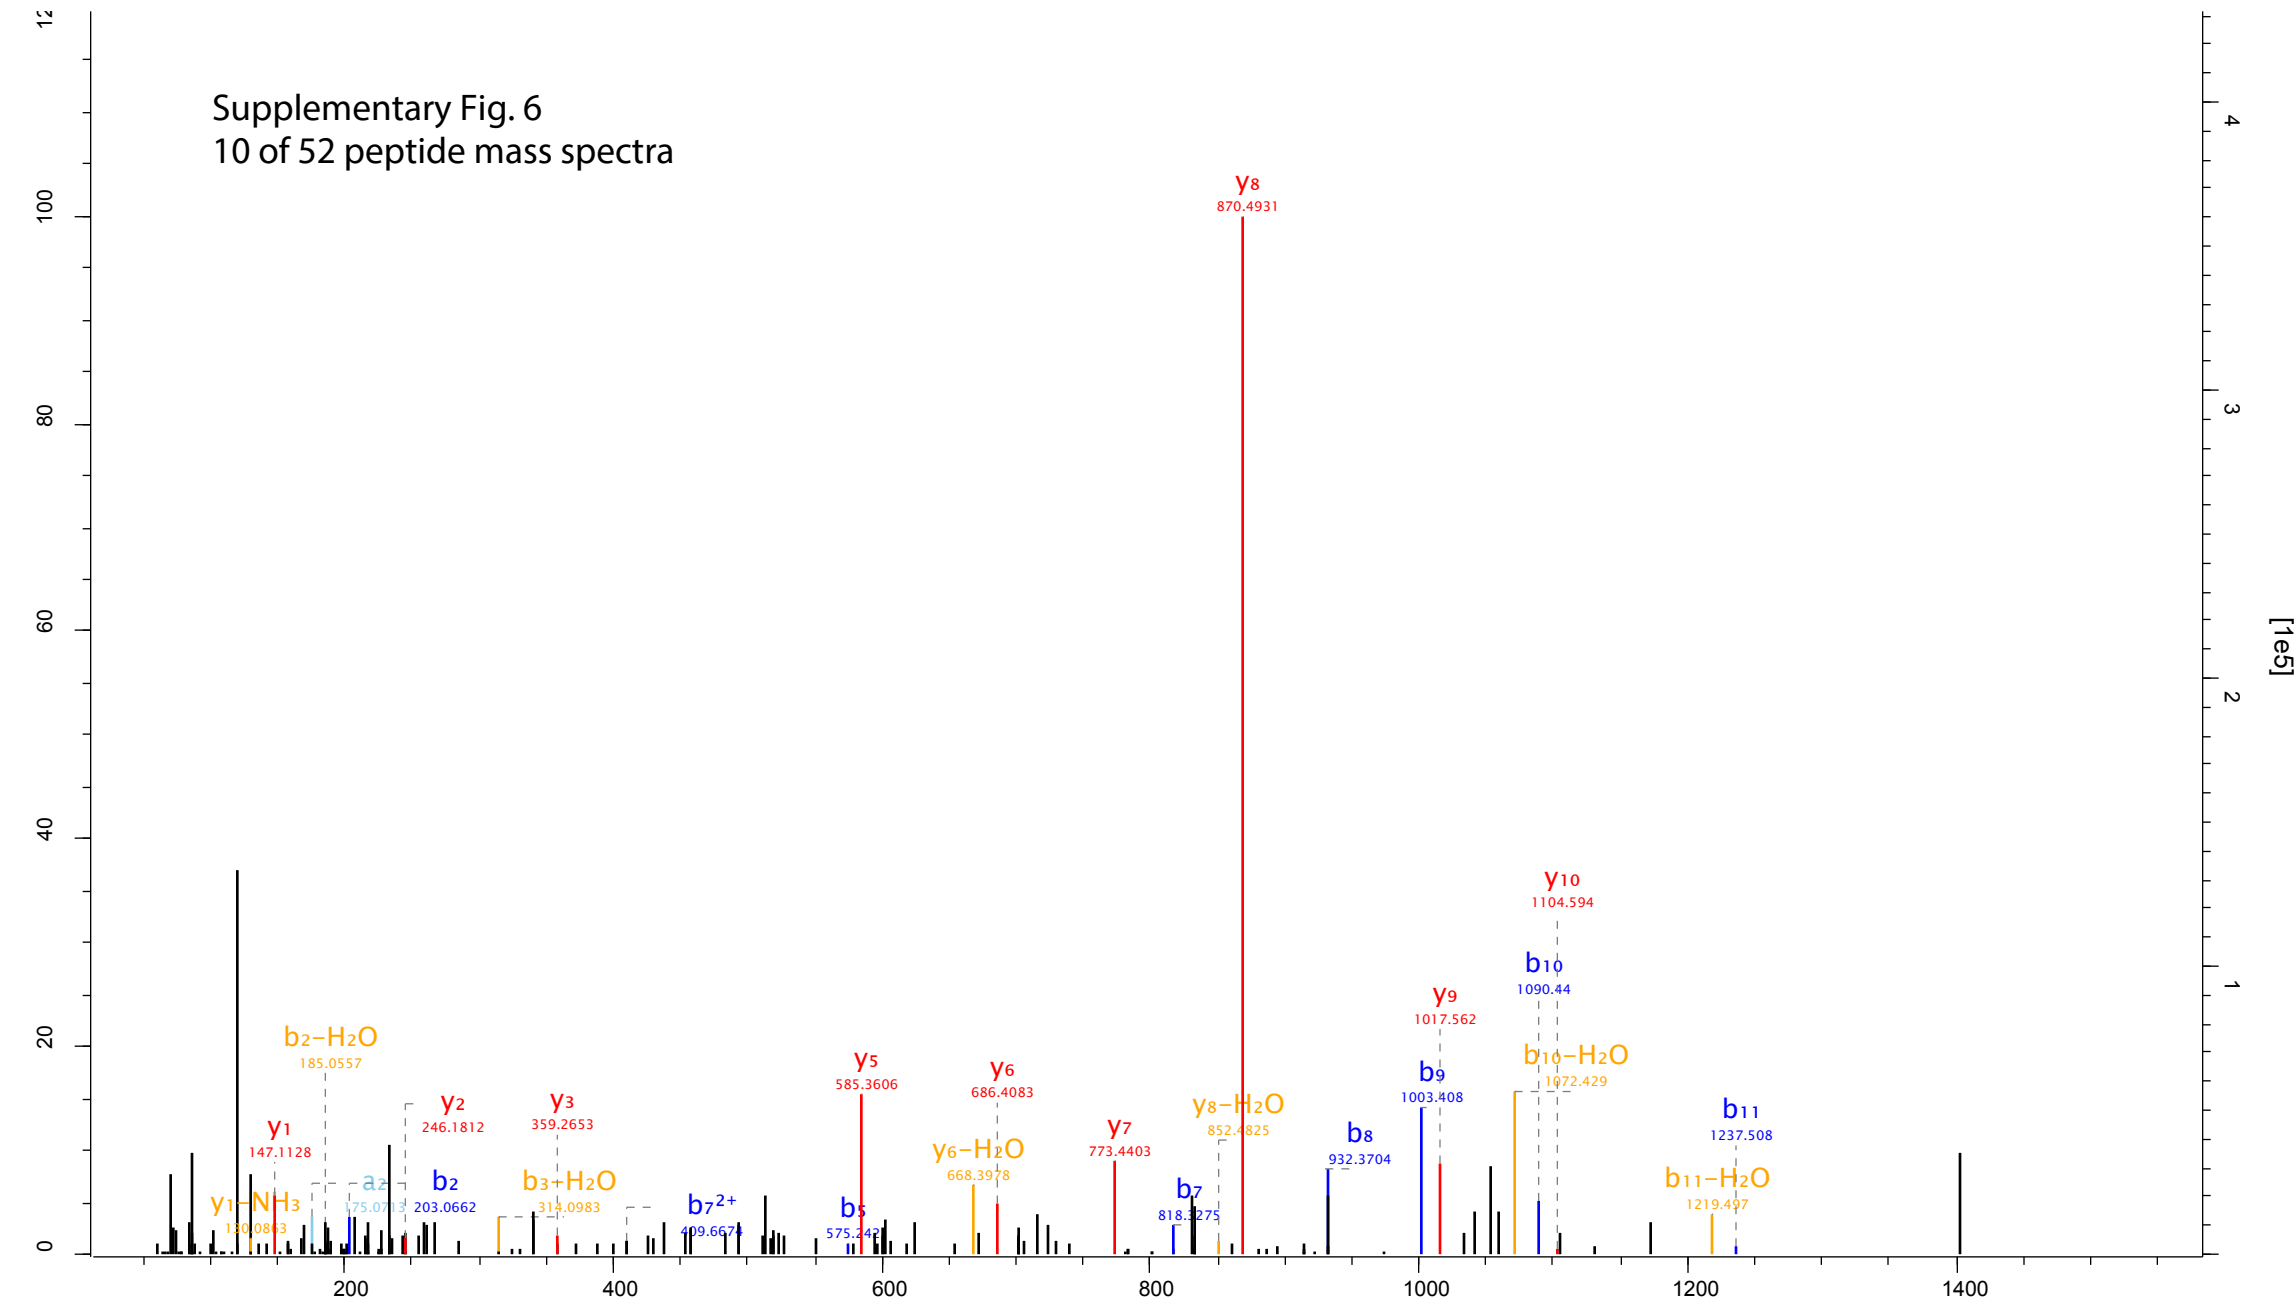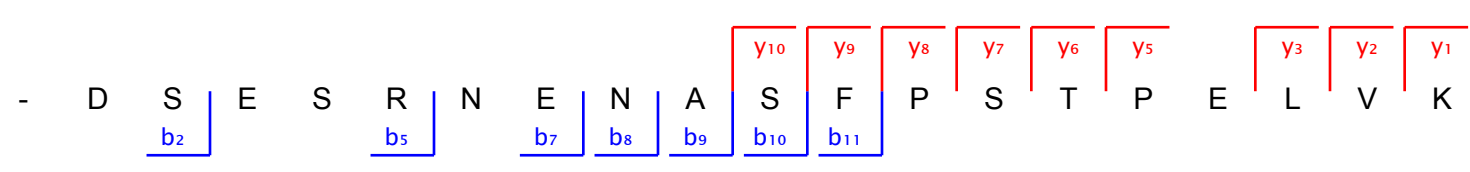

Supplementary Fig. 6  
11 of 52 peptide mass spectra

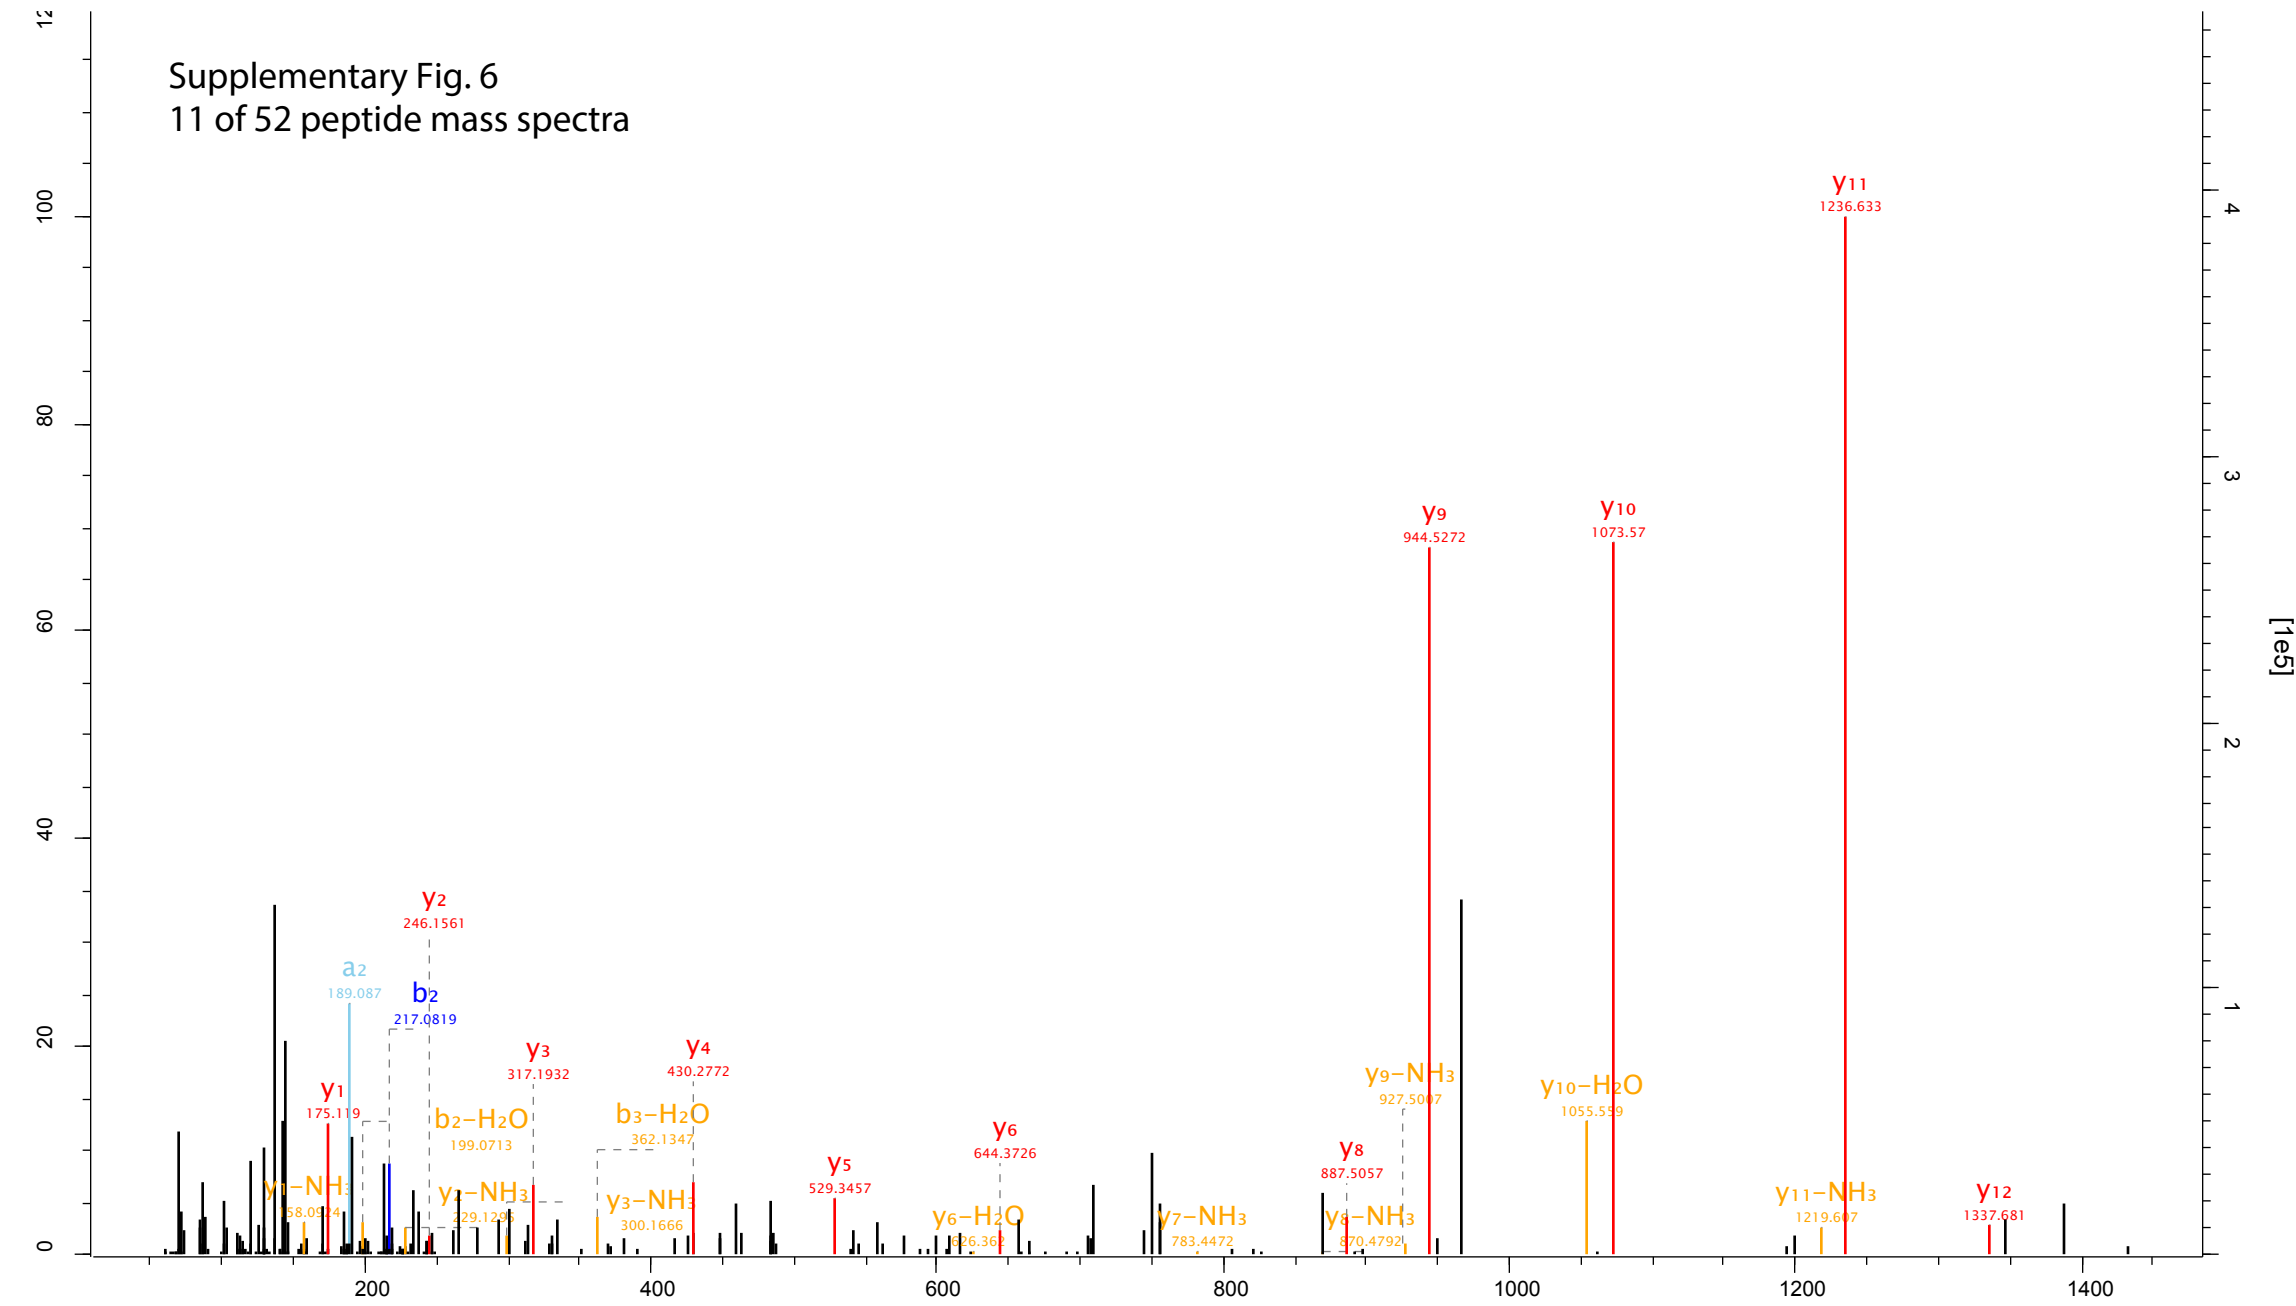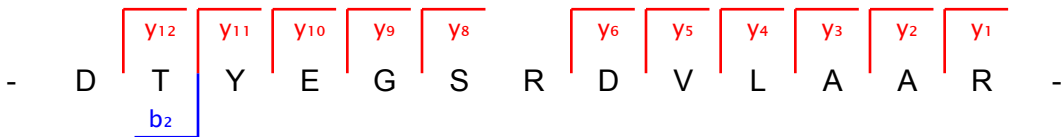

Supplementary Fig. 6  
12 of 52 peptide mass spectra

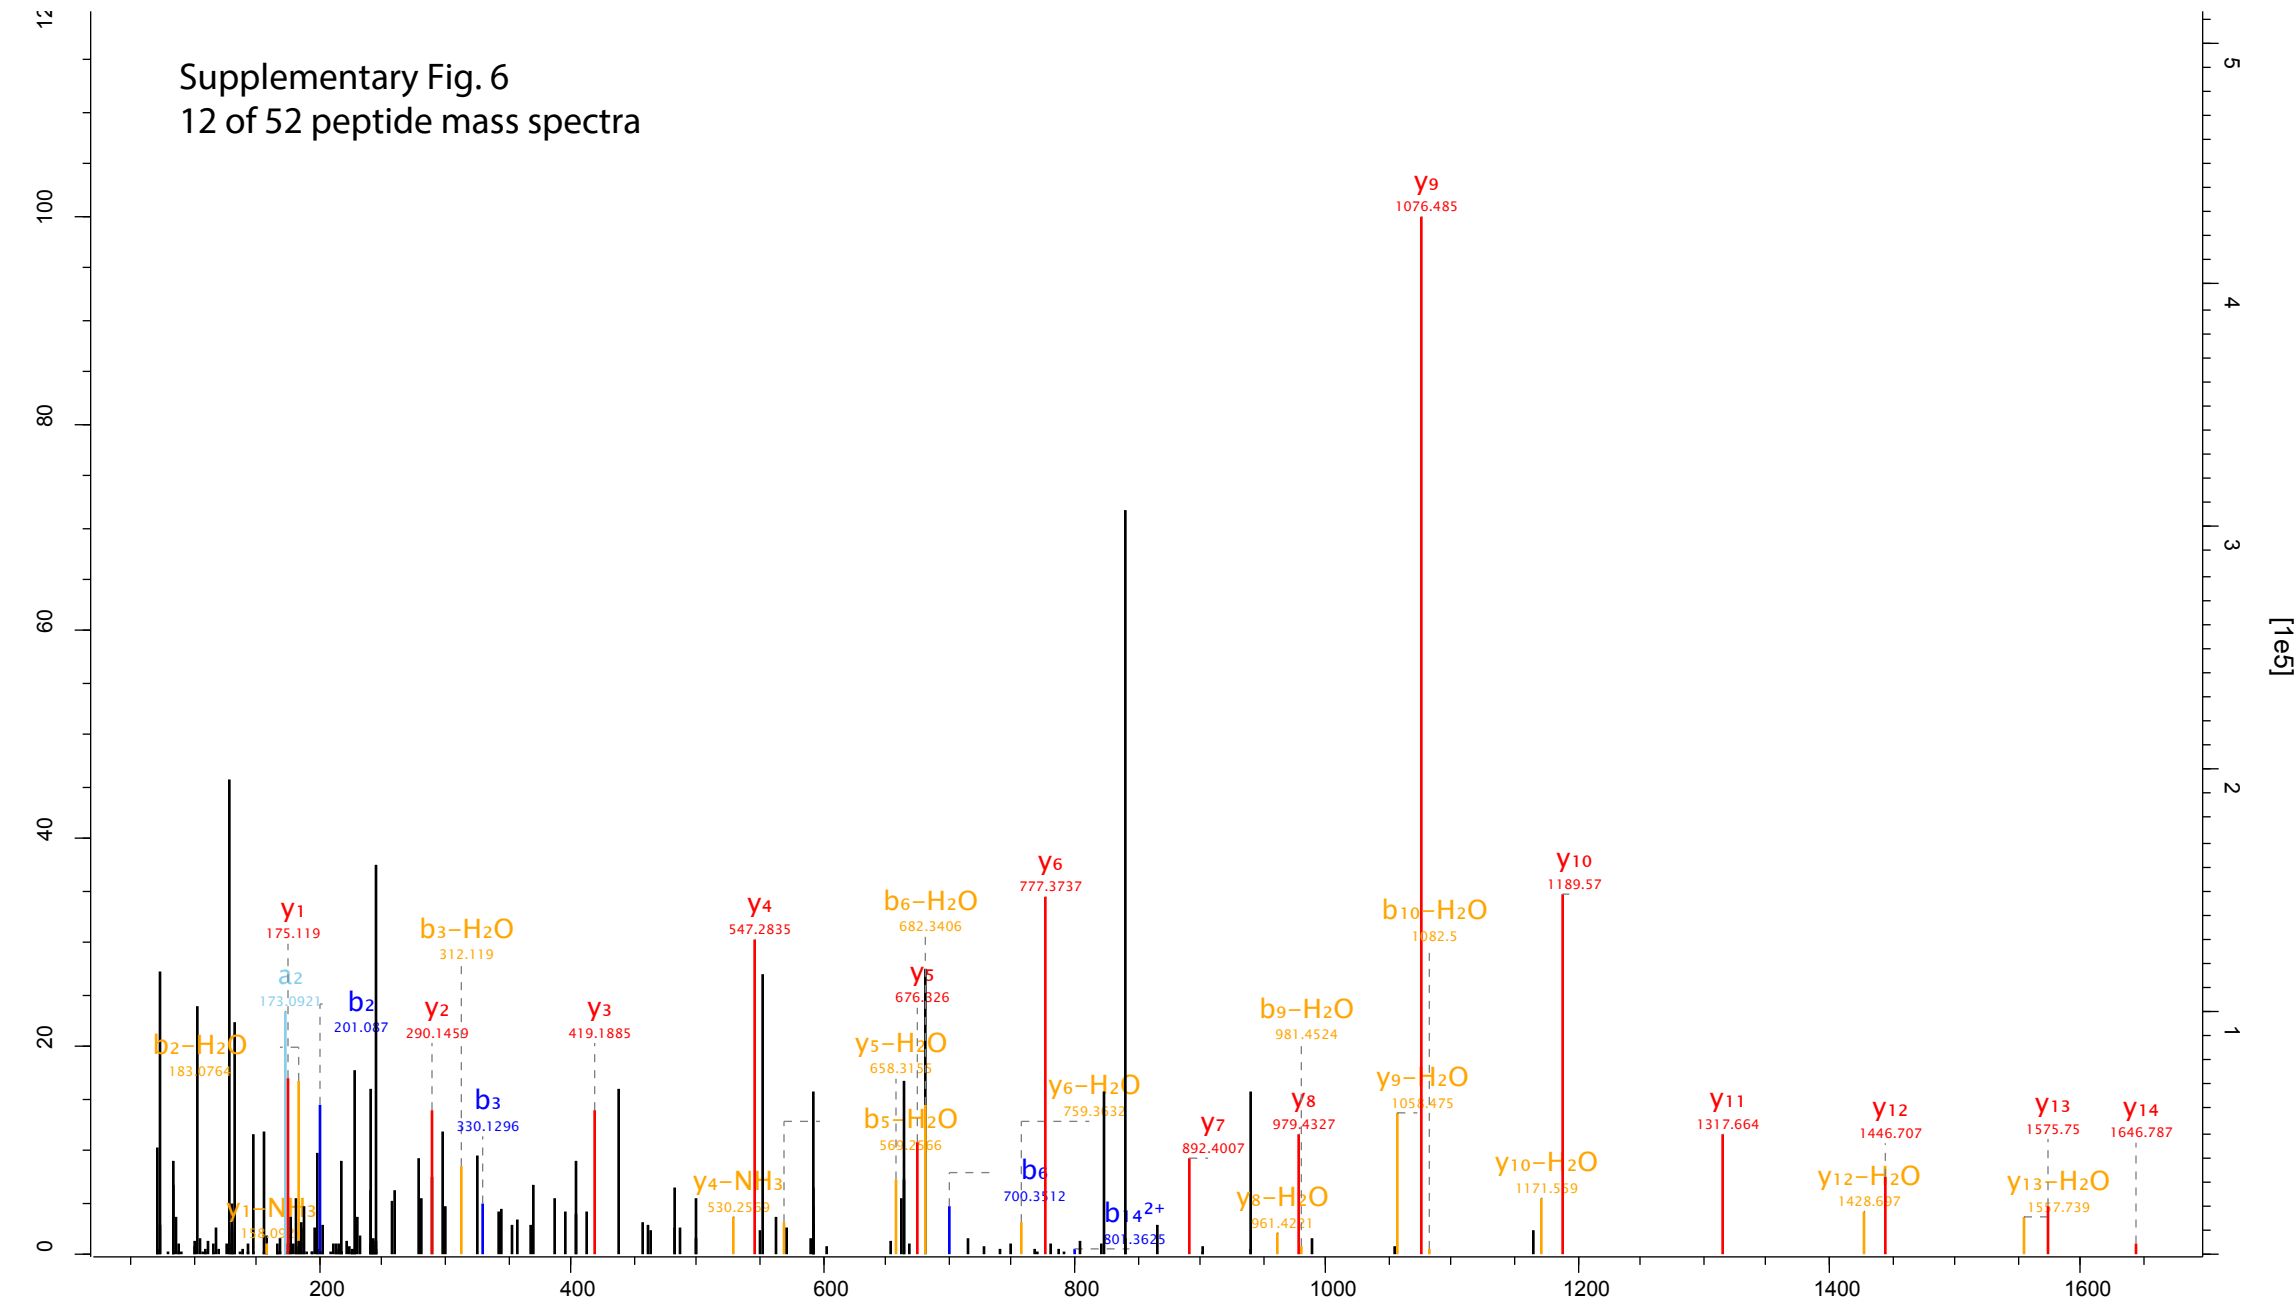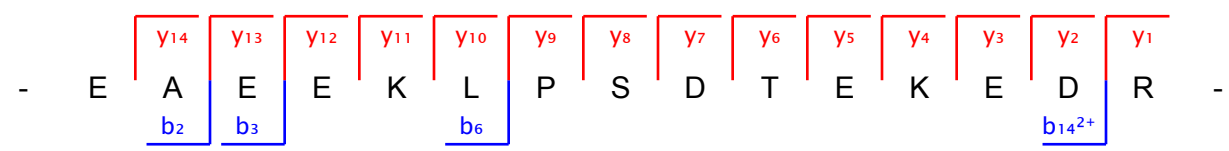



Supplementary Fig. 6  
13 of 52 peptide mass spectra

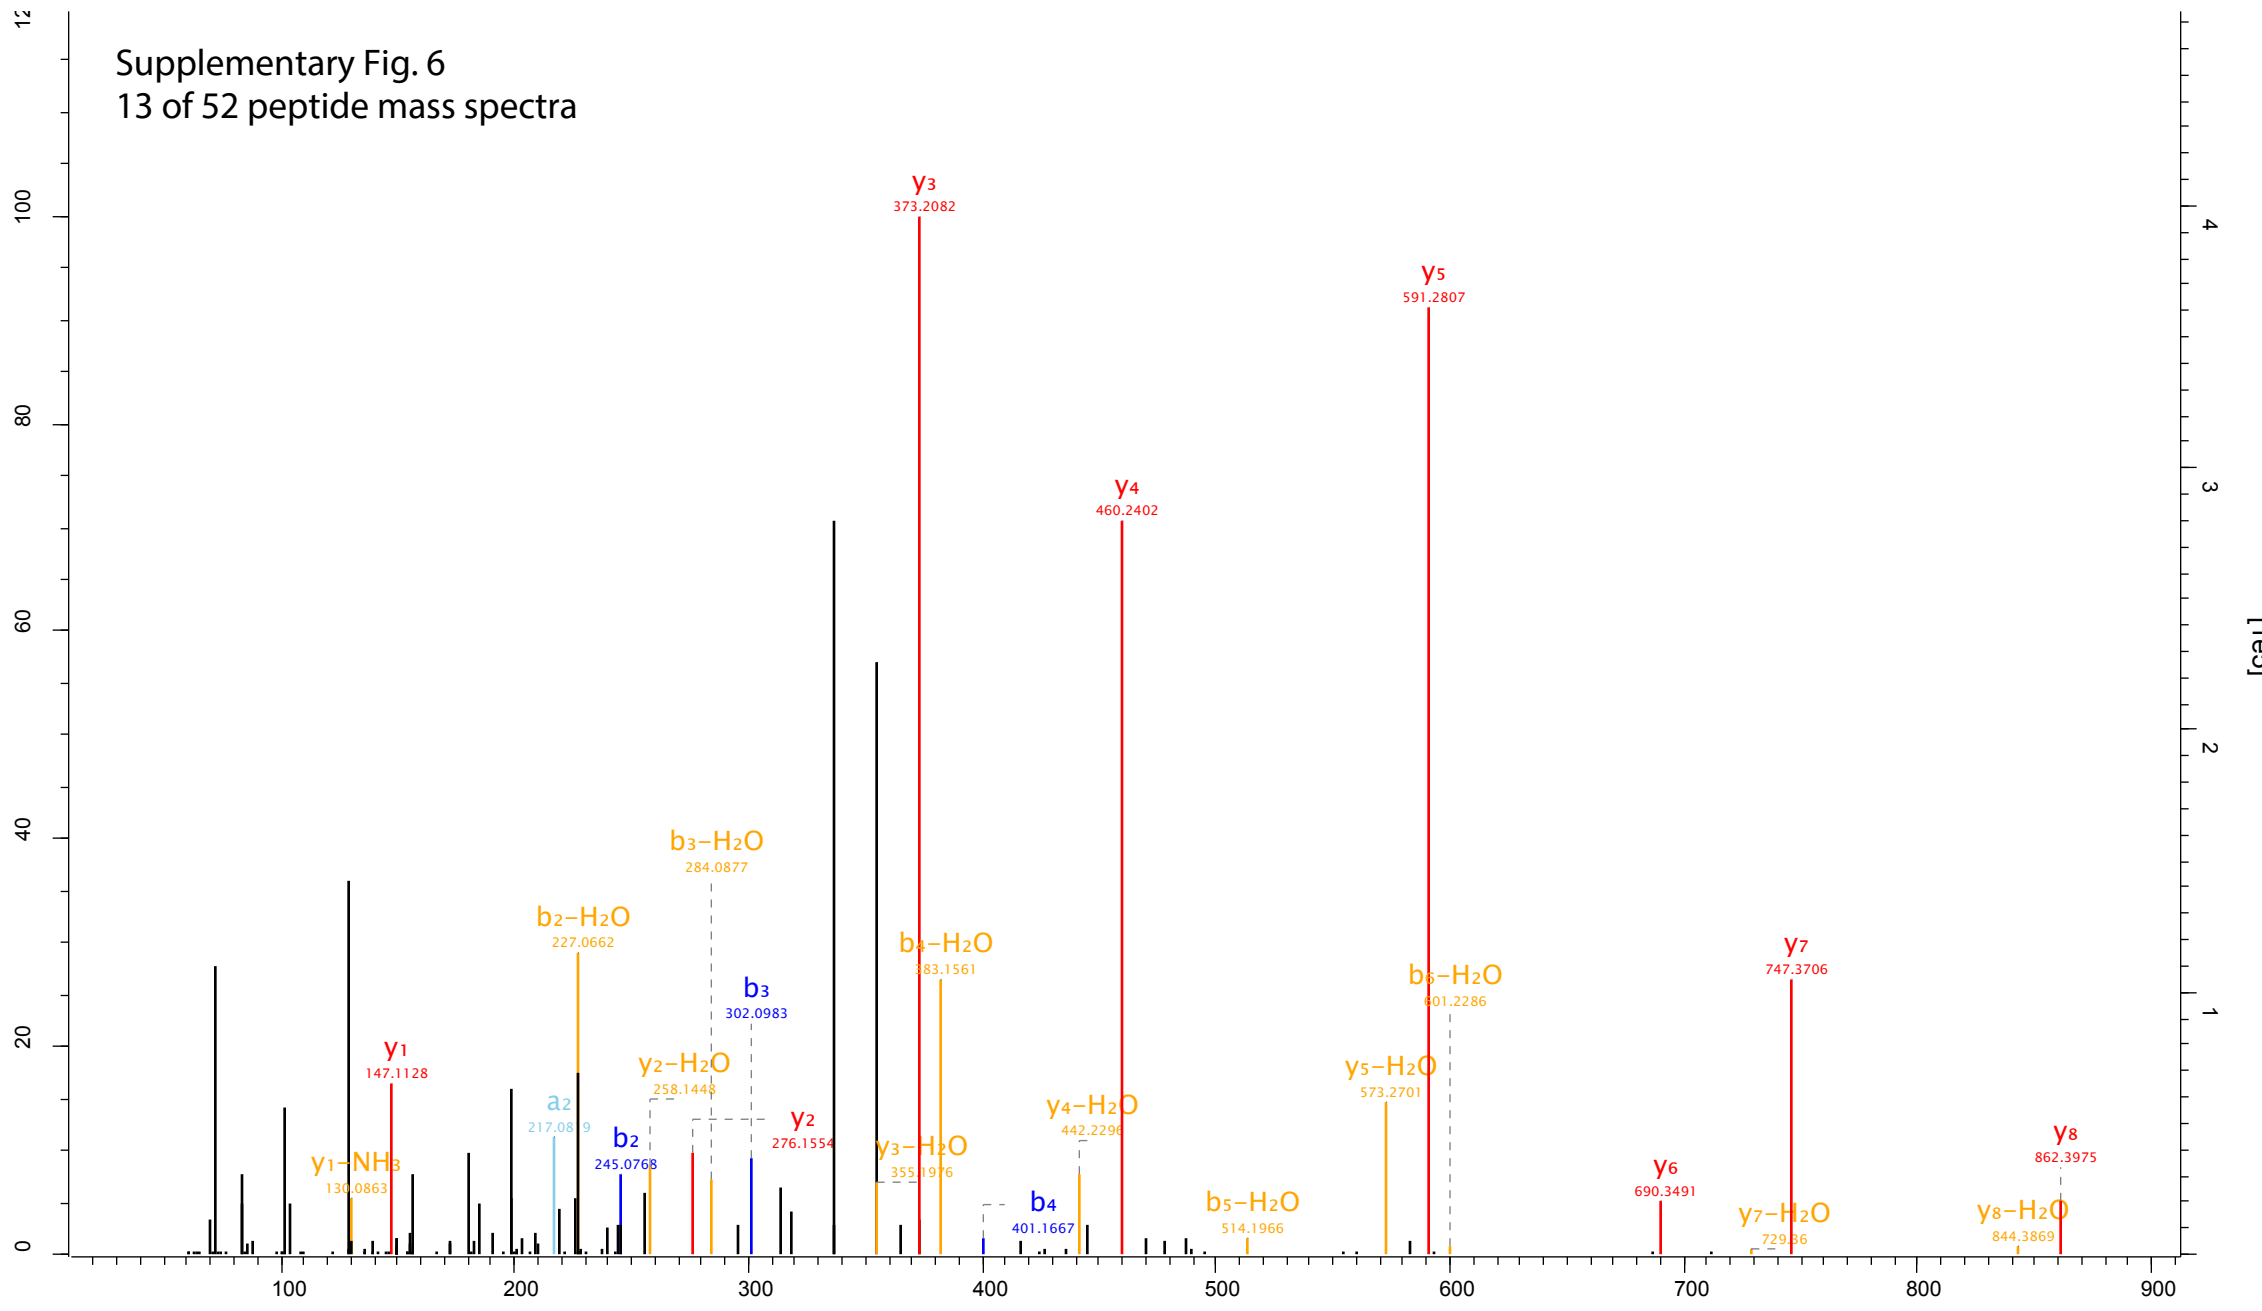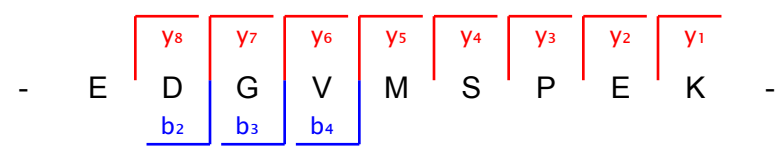

Supplementary Fig. 6  
14 of 52 peptide mass spectra

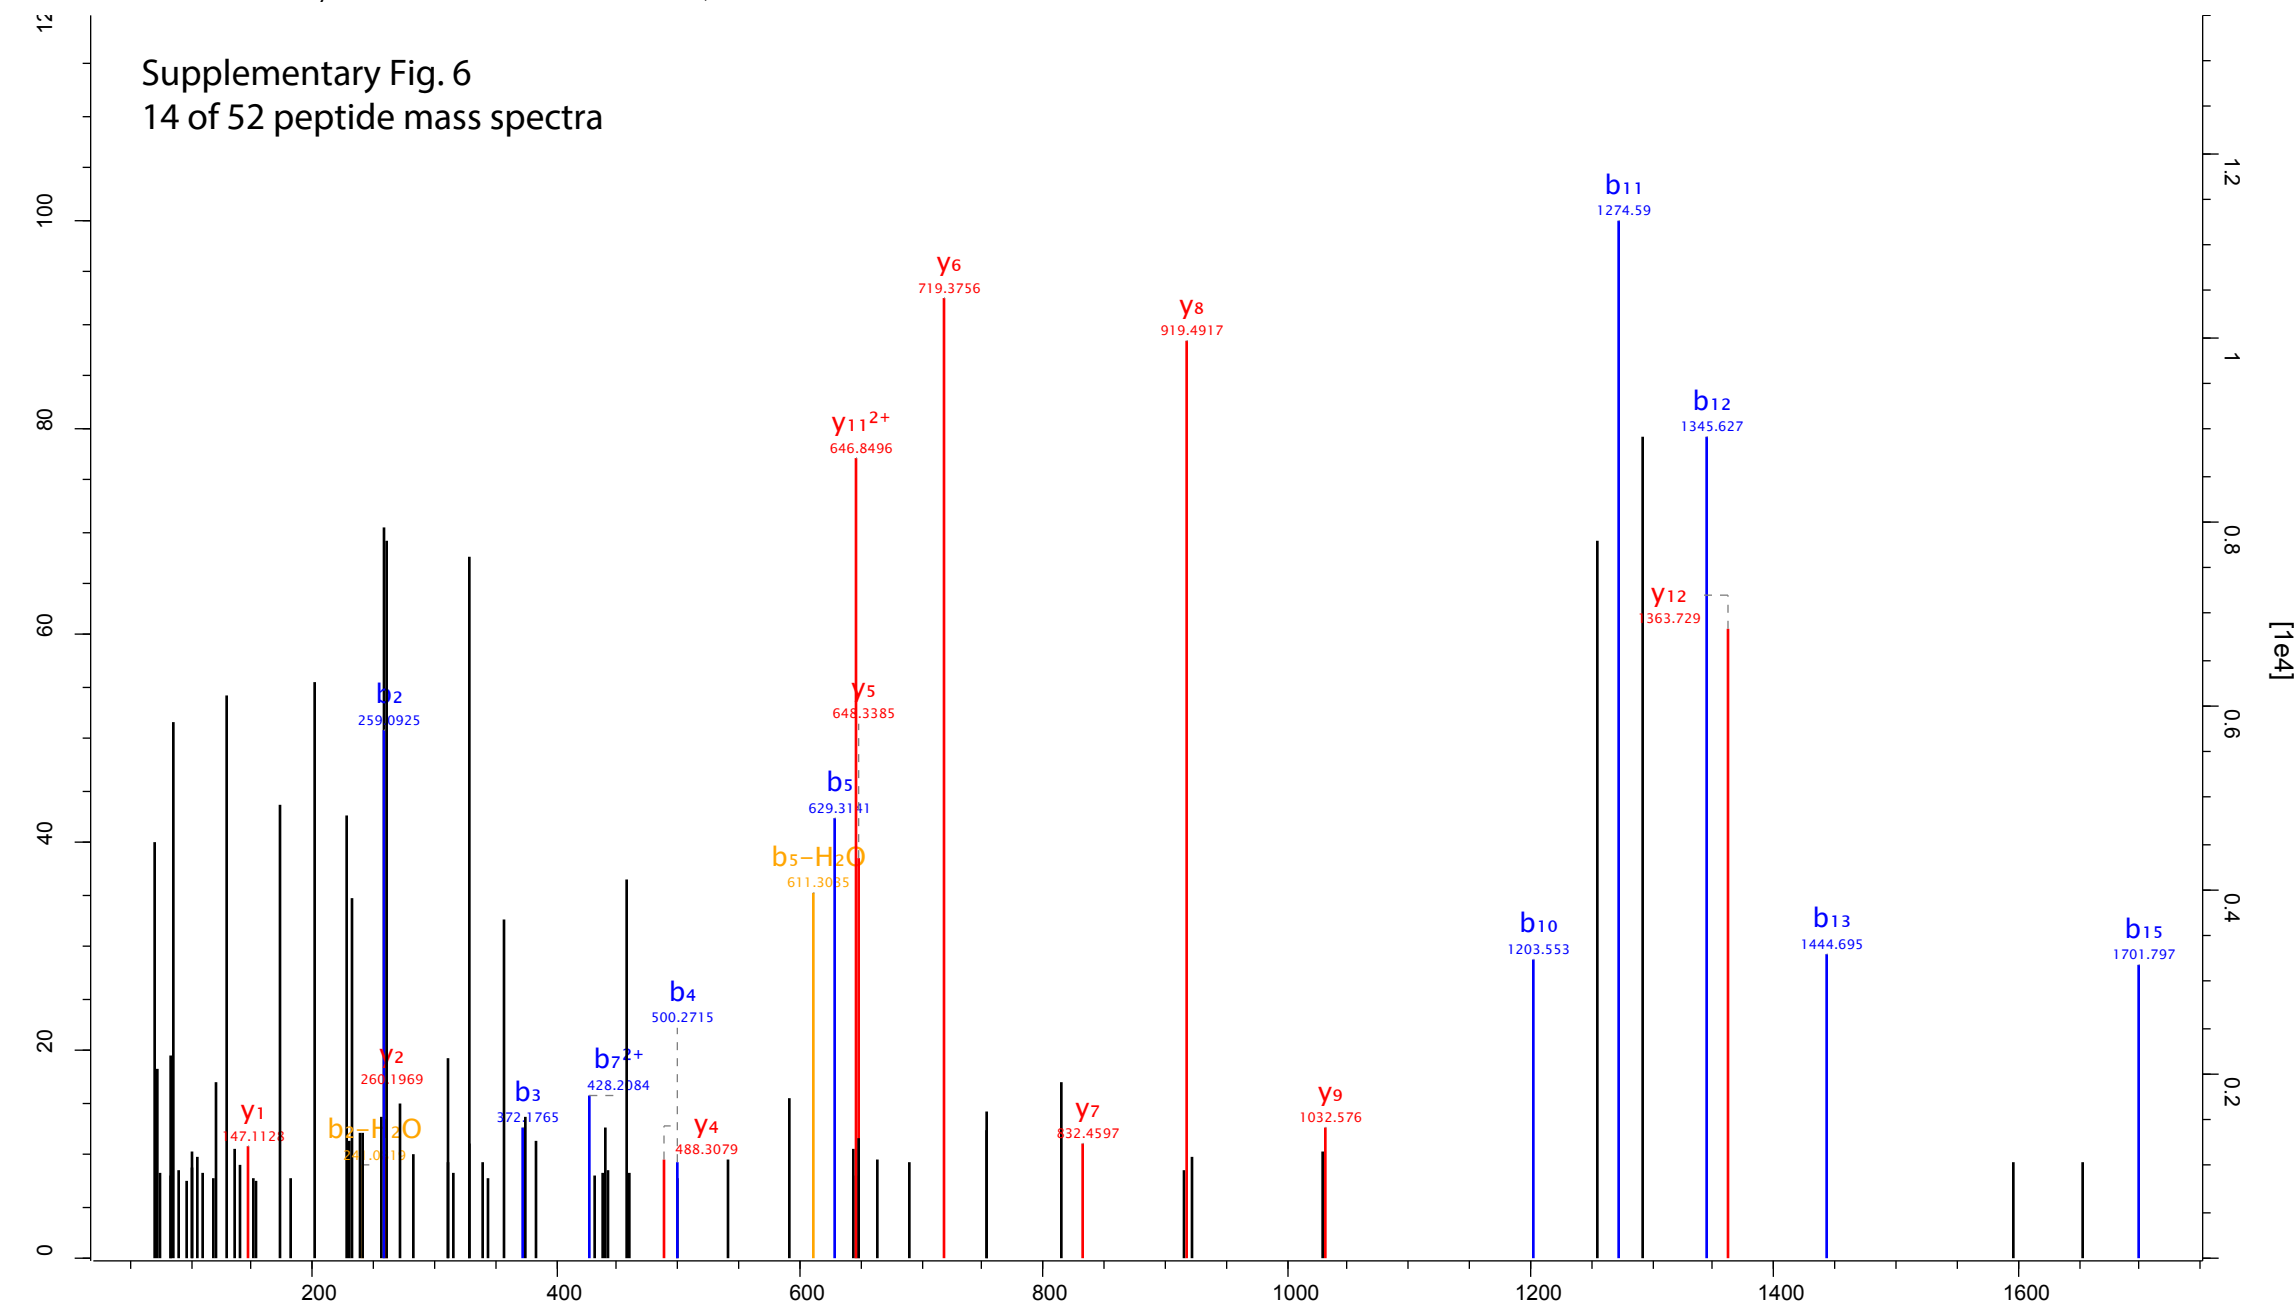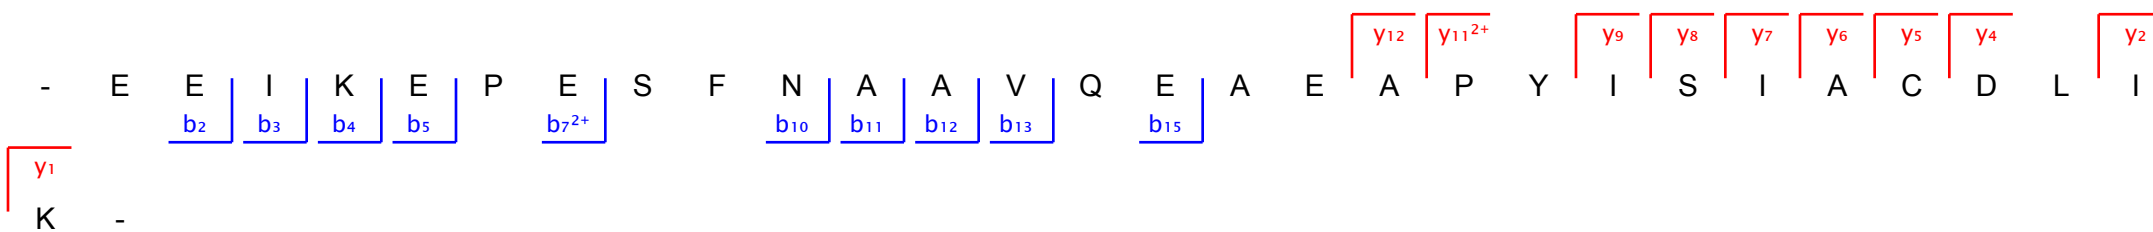

### Supplementary Fig. 6 15 of 52 peptide mass spectra

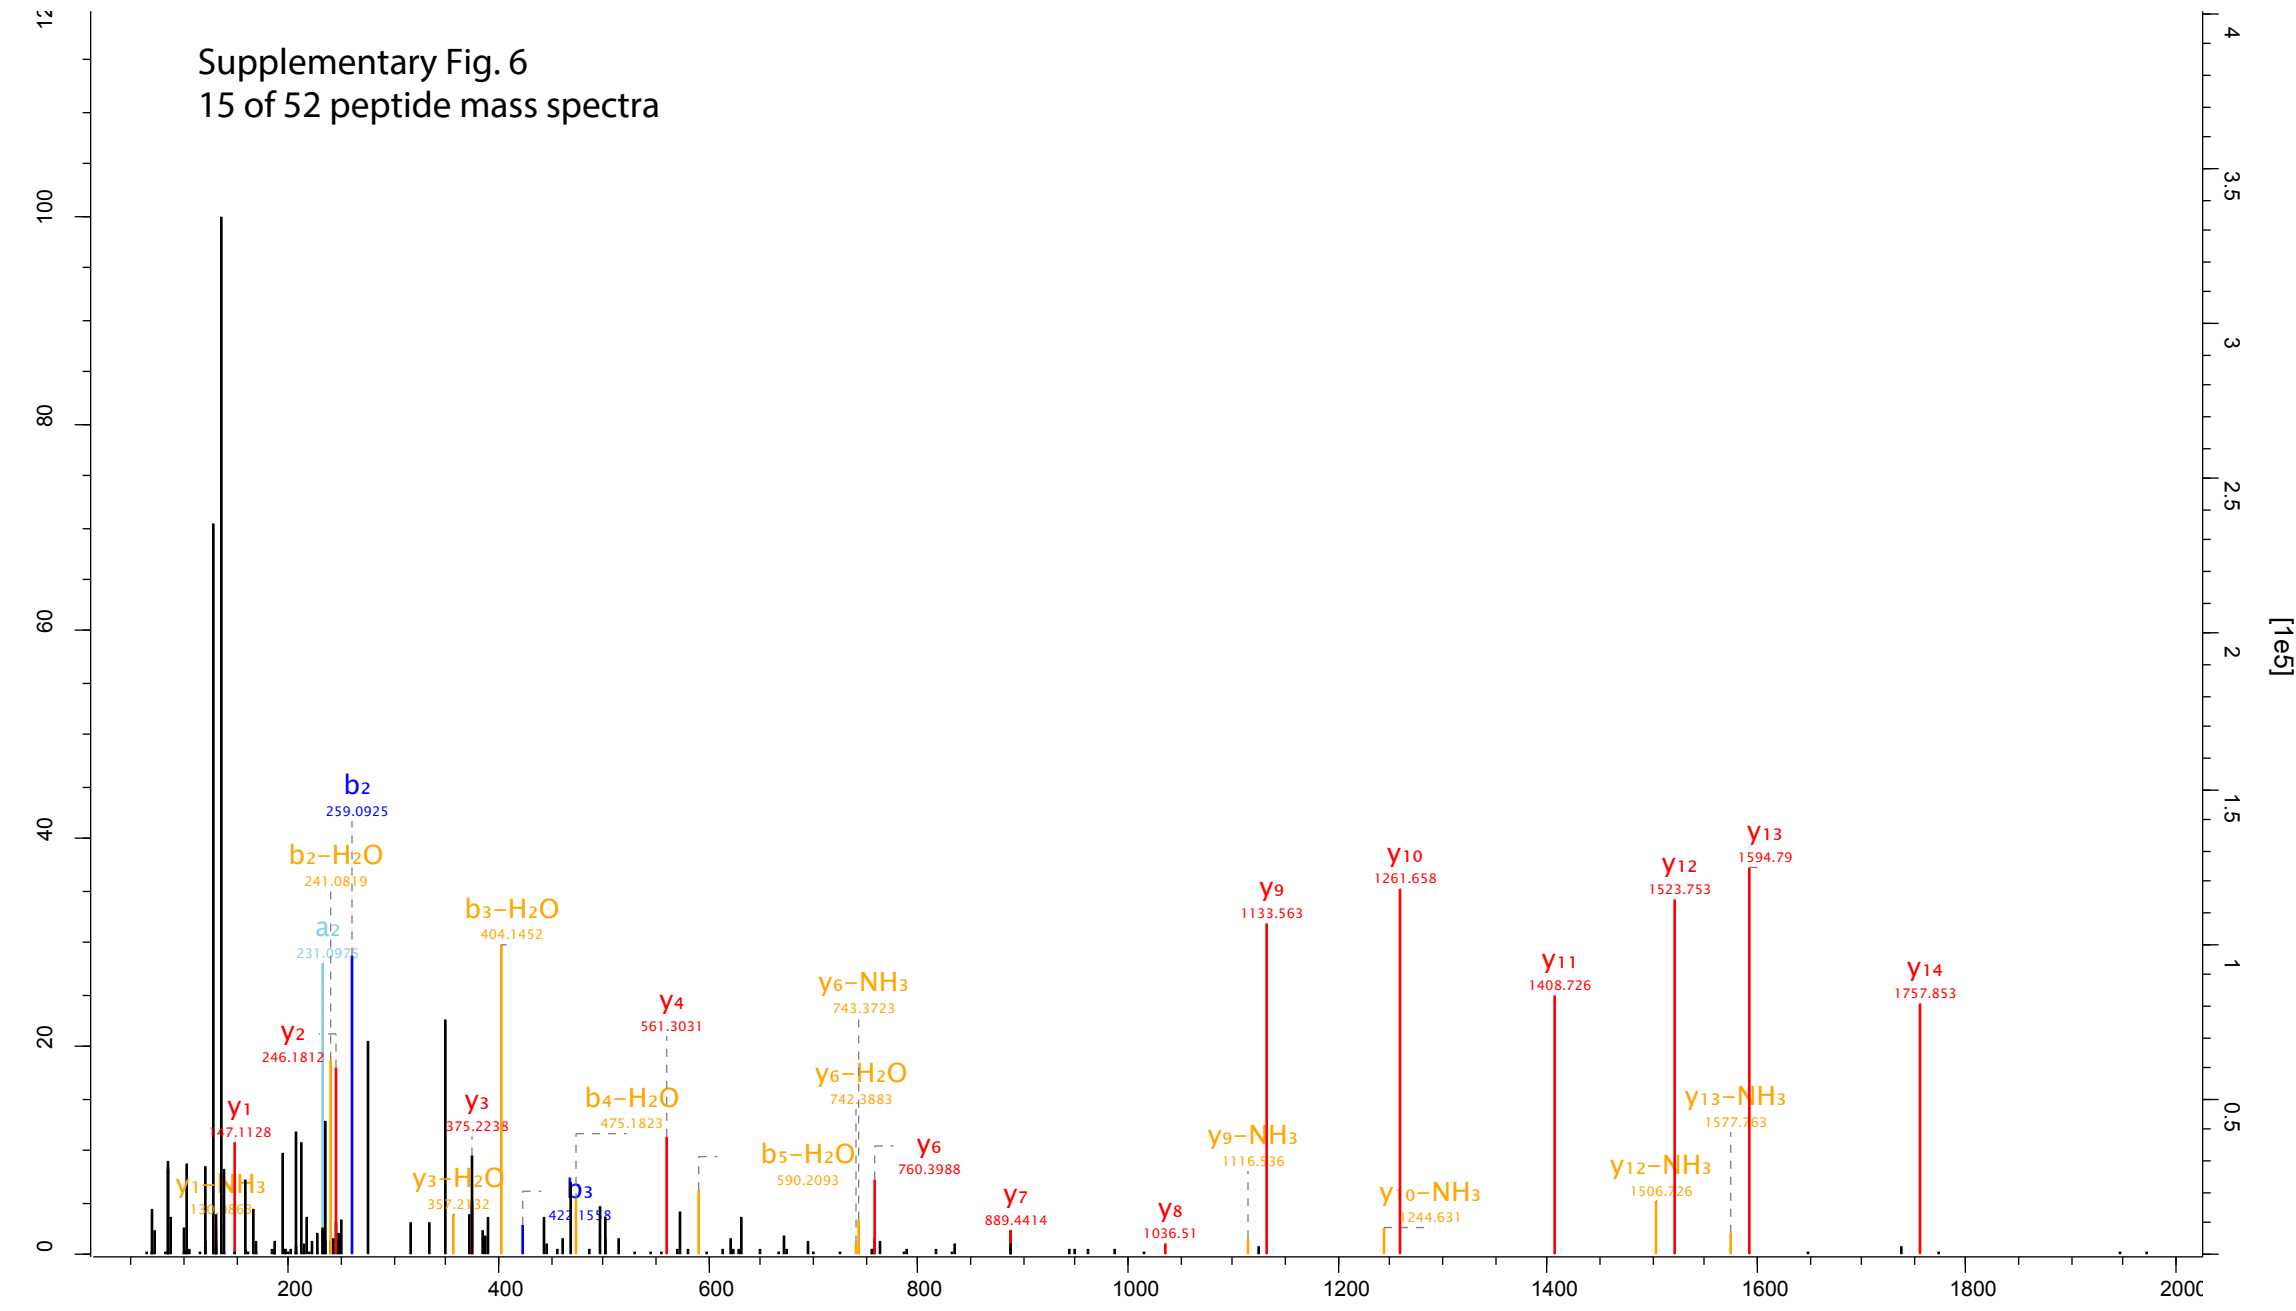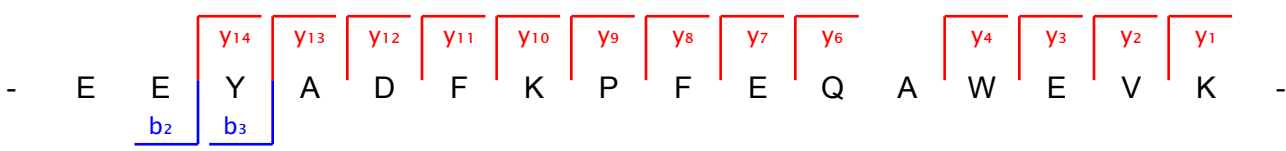

Supplementary Fig. 6  
16 of 52 peptide mass spectra

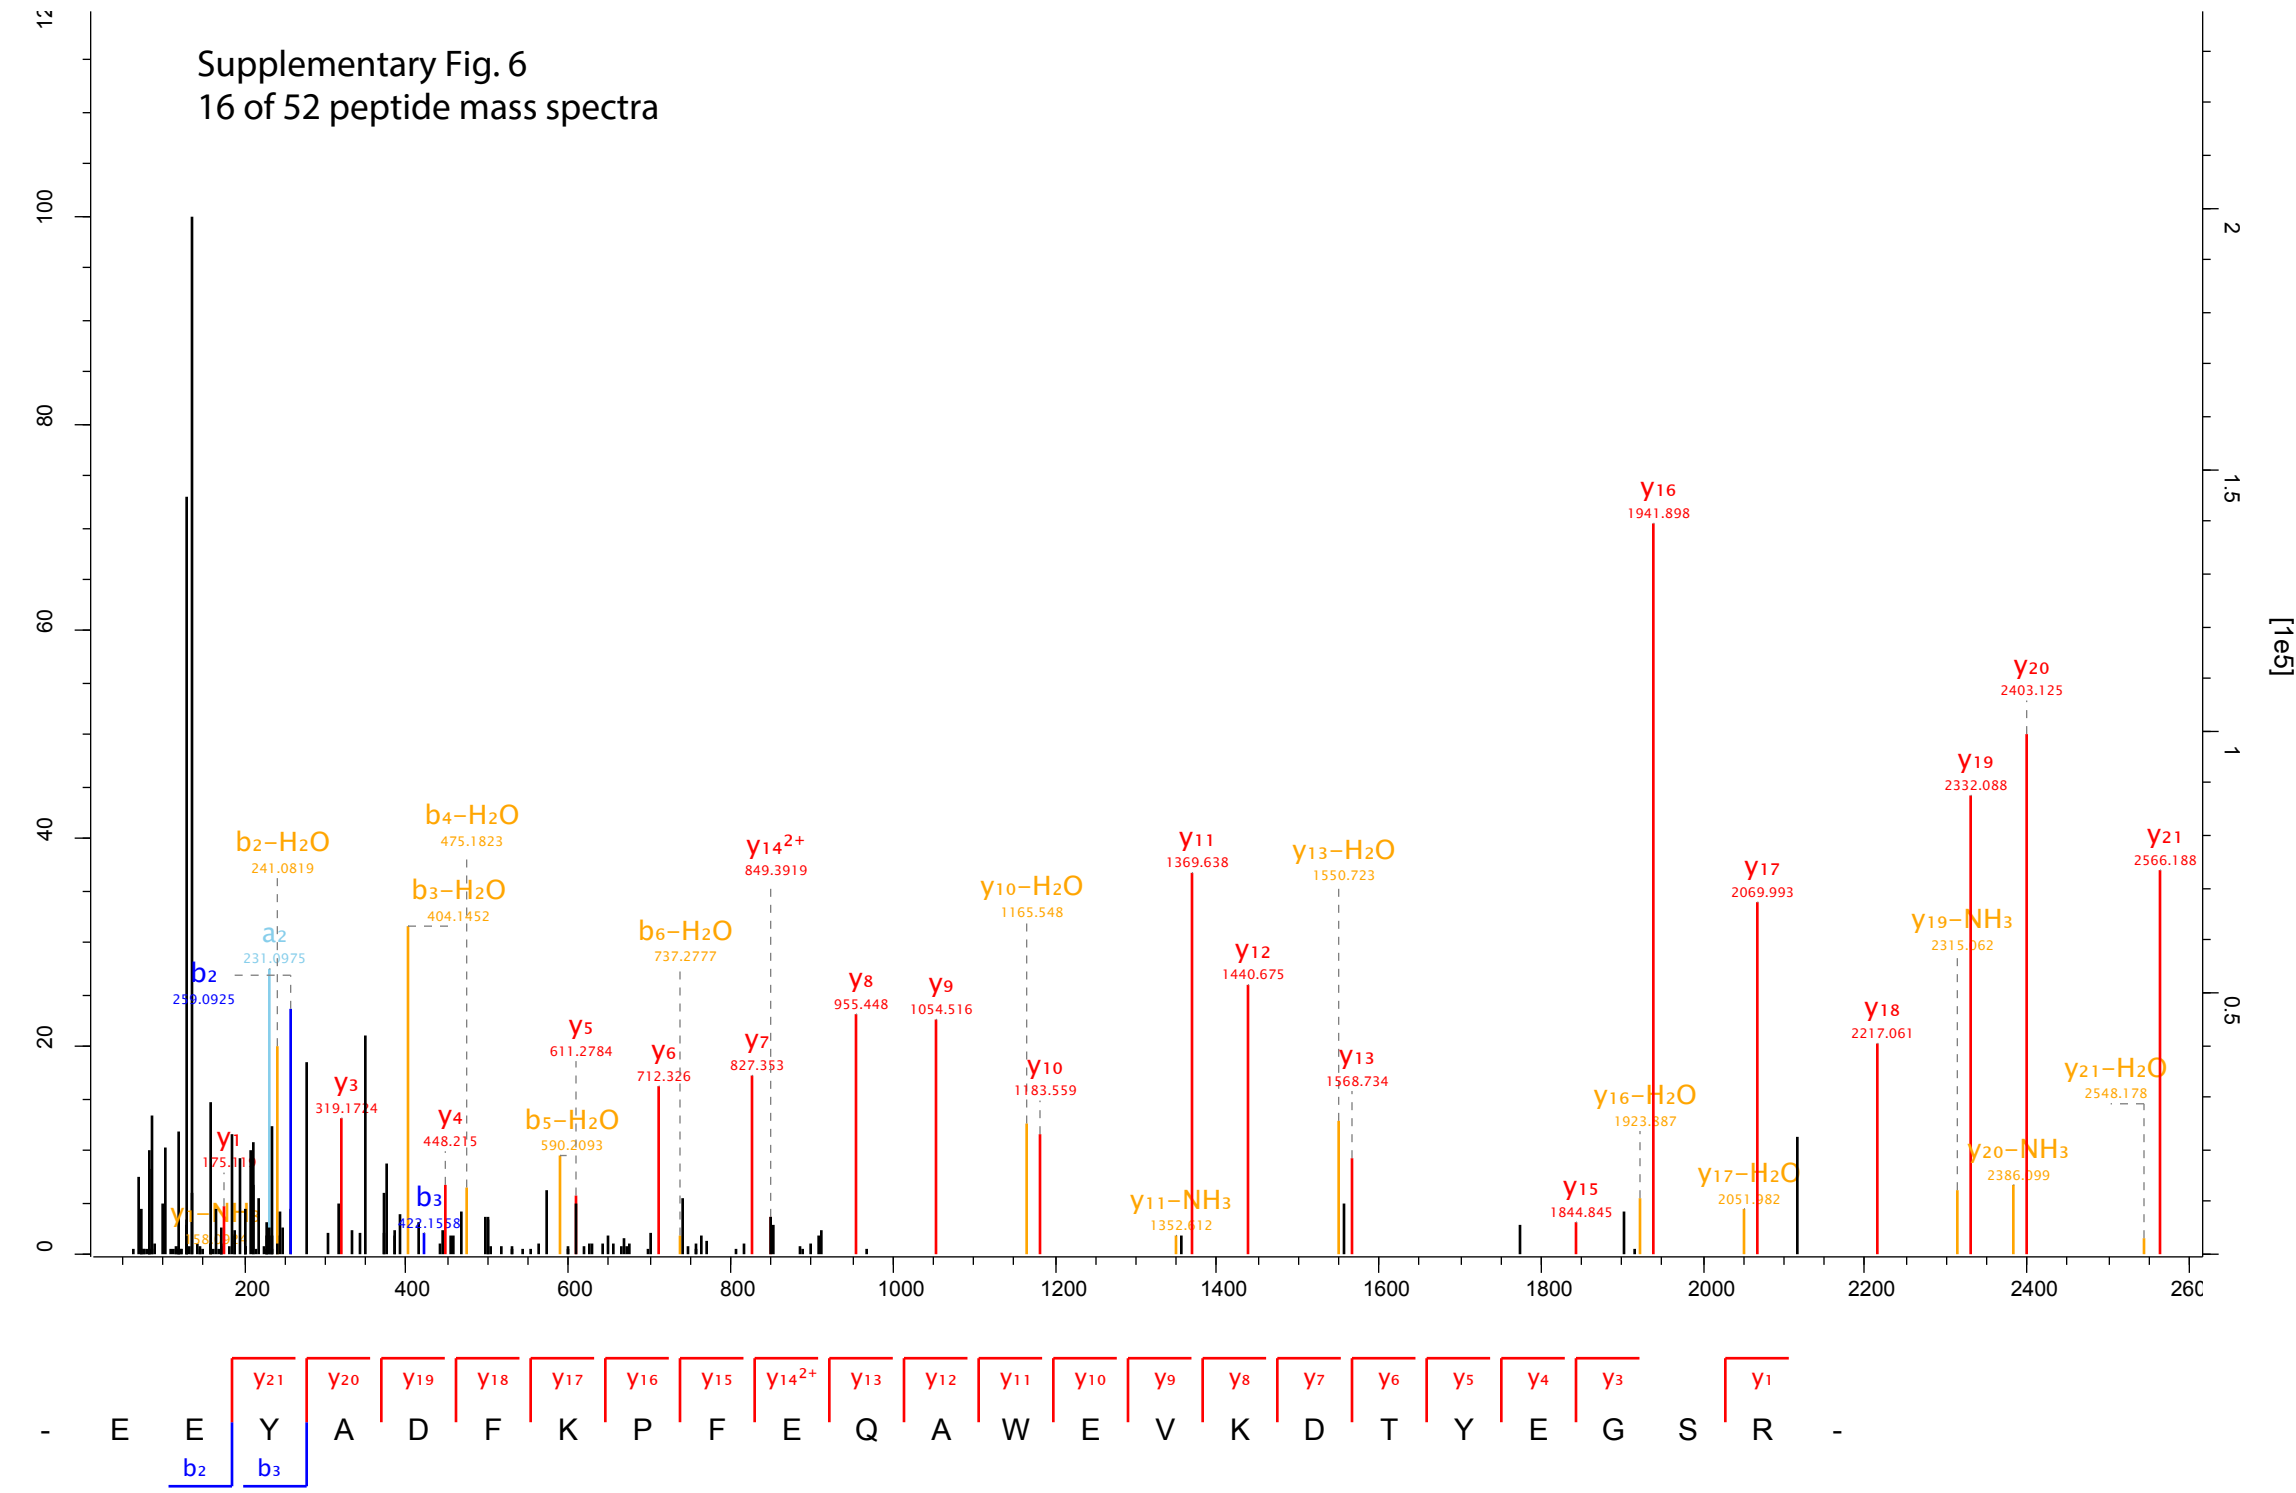

Supplementary Fig. 6  
17 of 52 peptide mass spectra

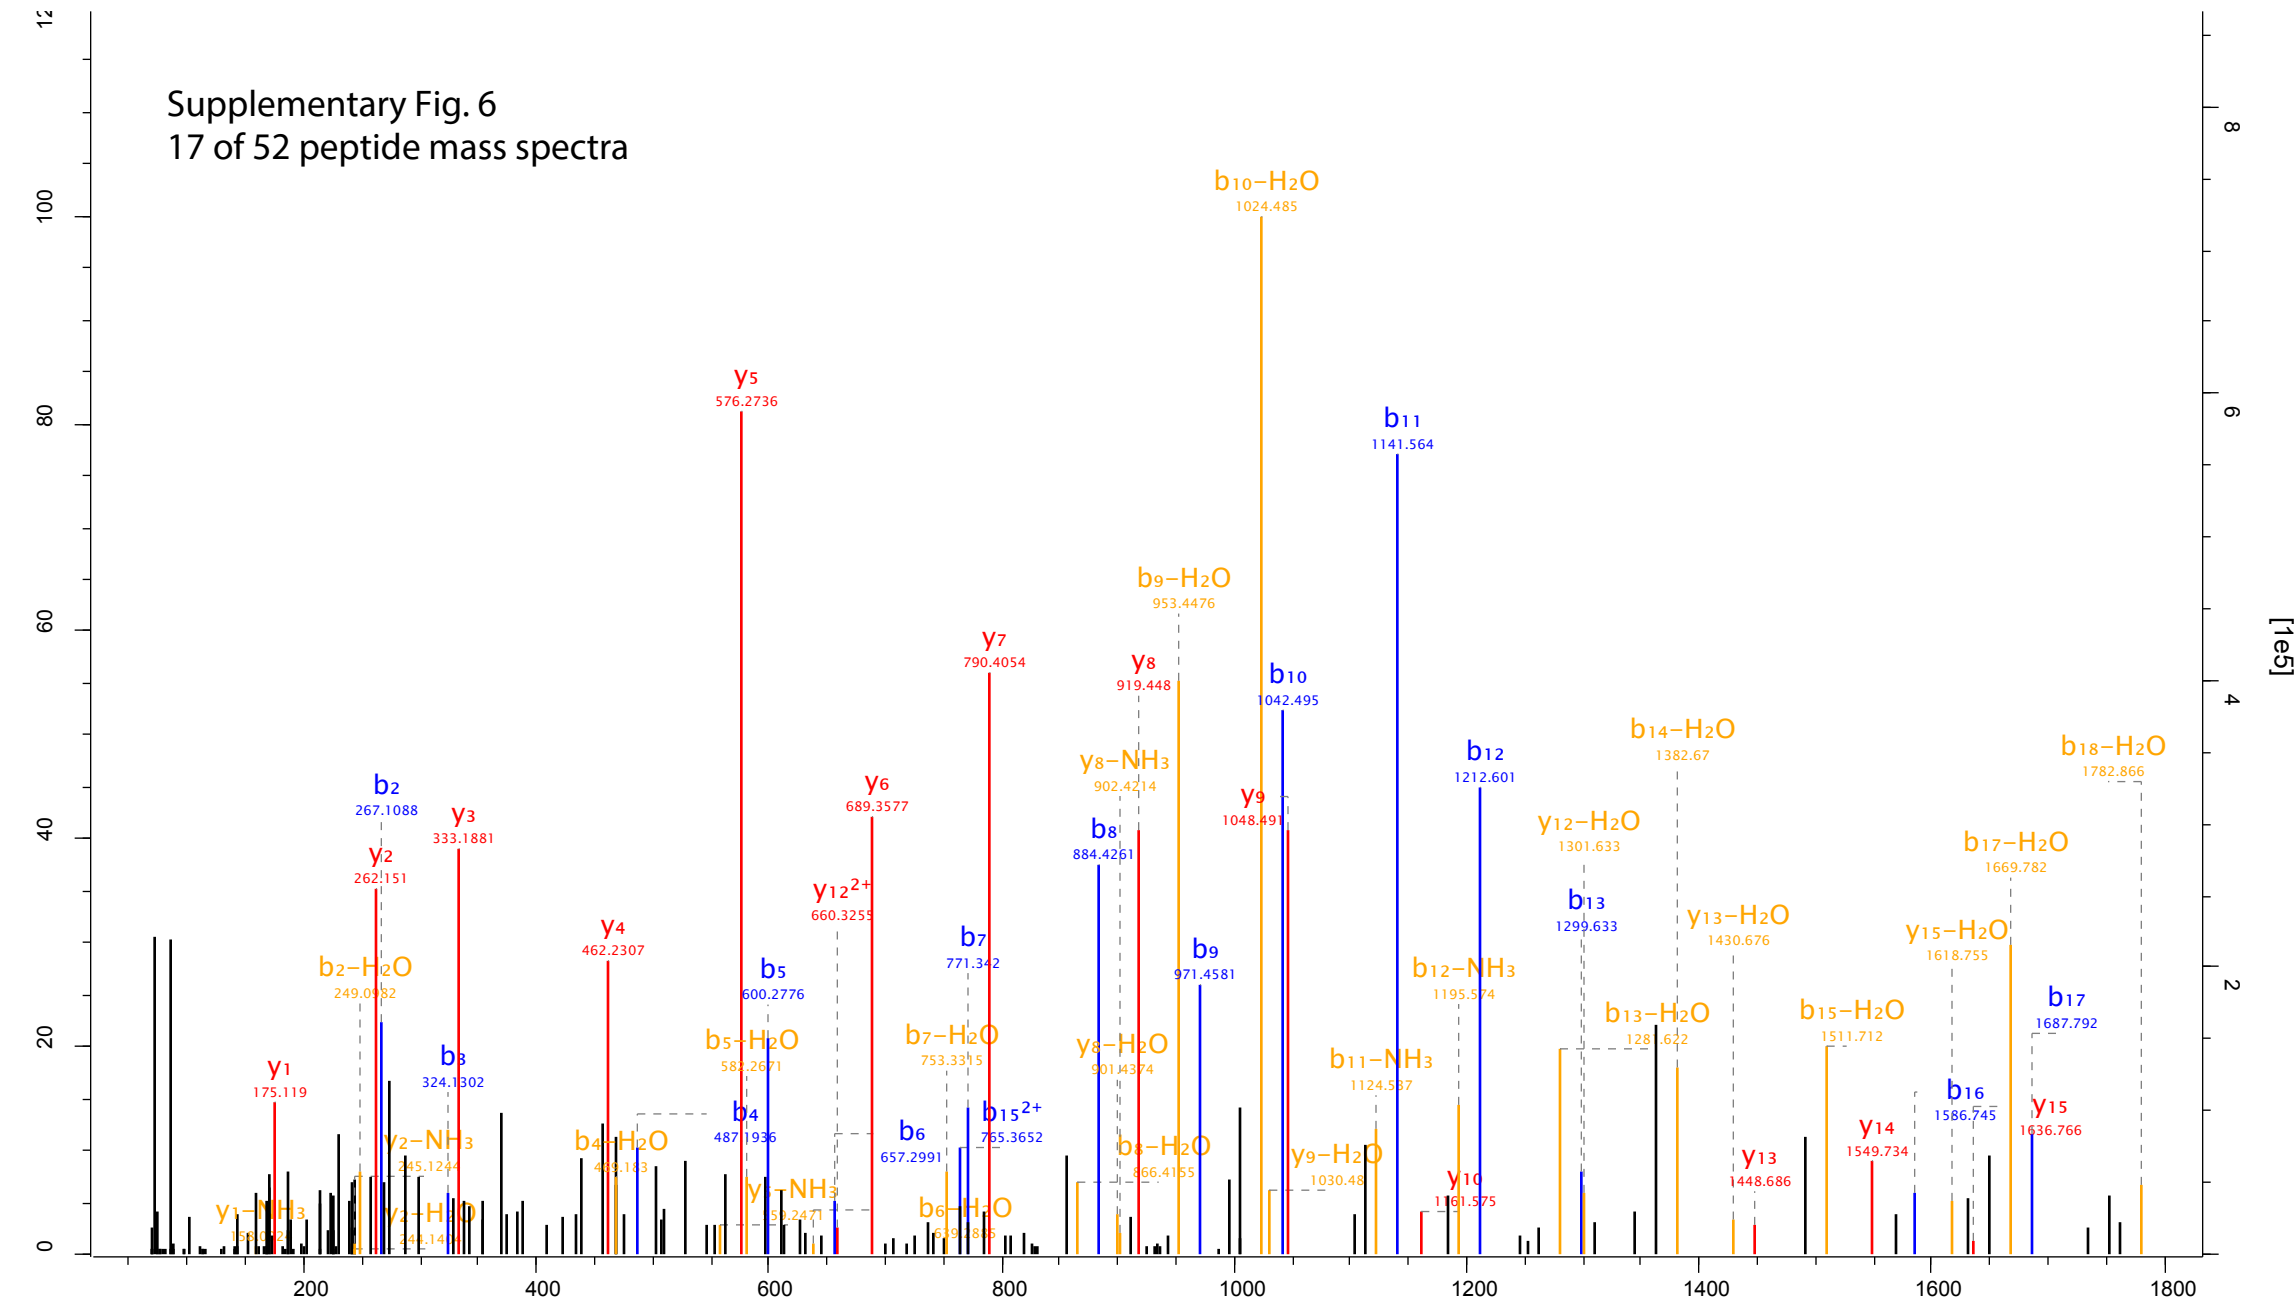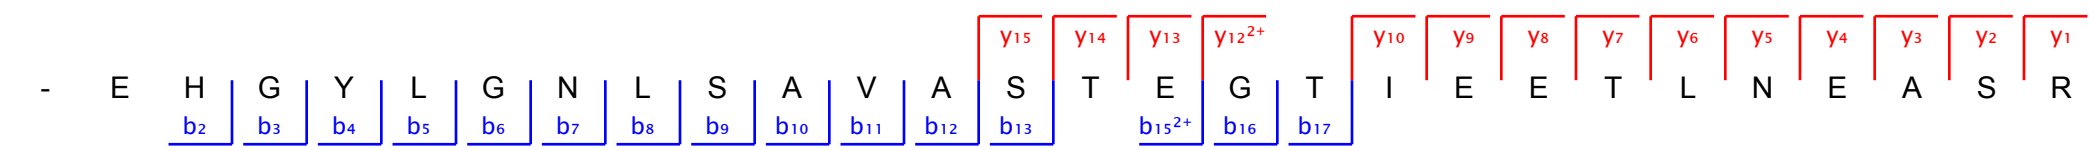

Supplementary Fig. 6  
18 of 52 peptide mass spectra

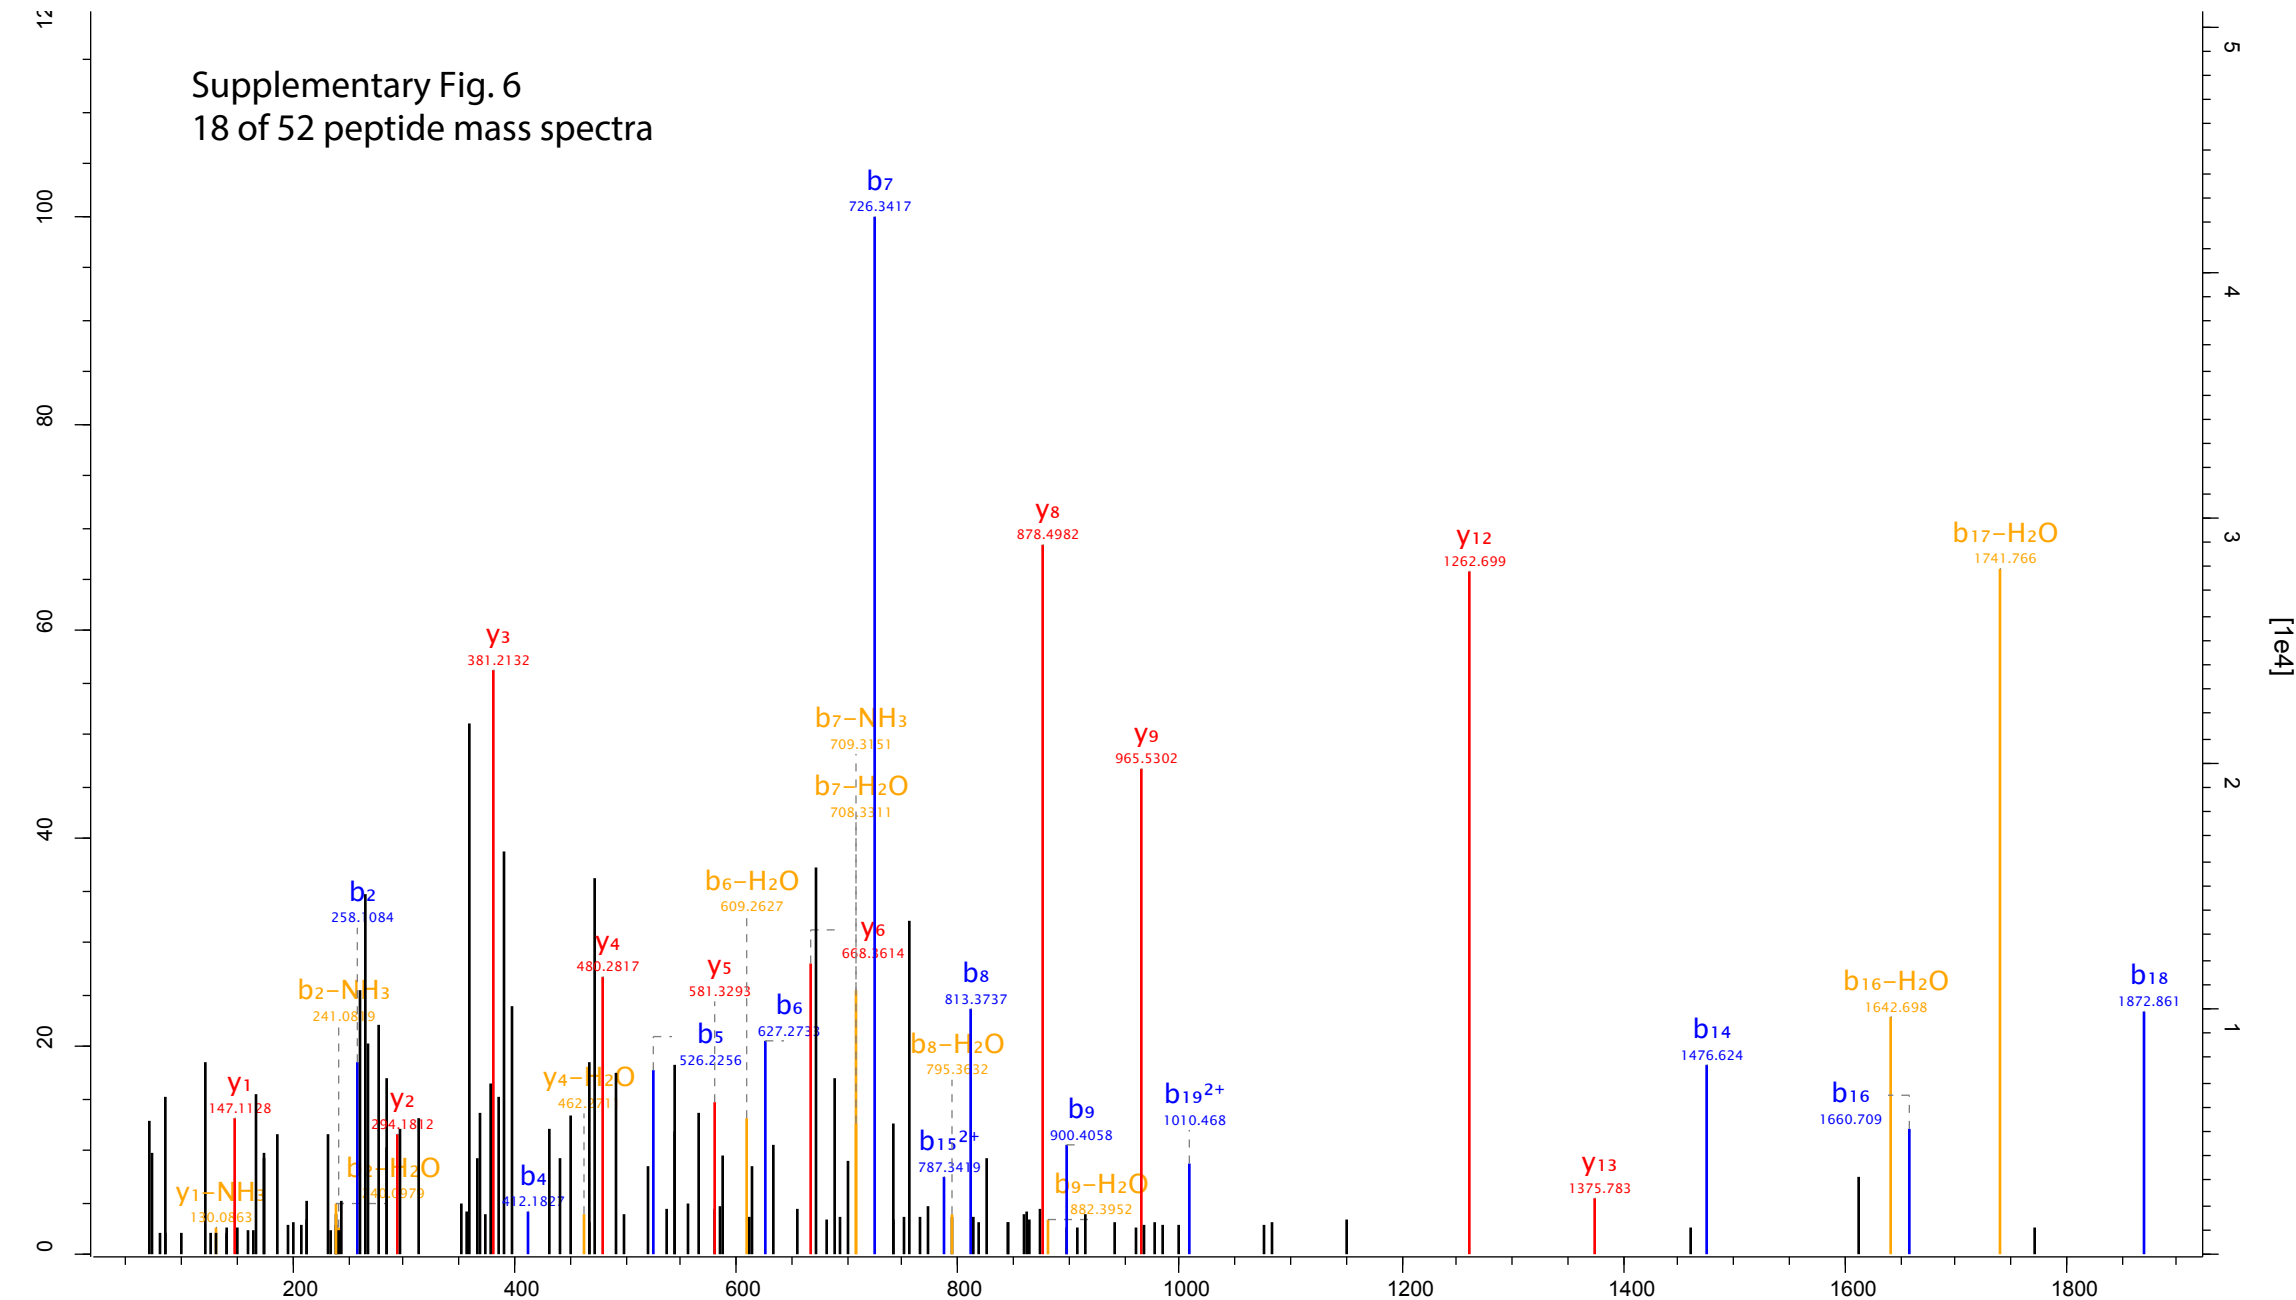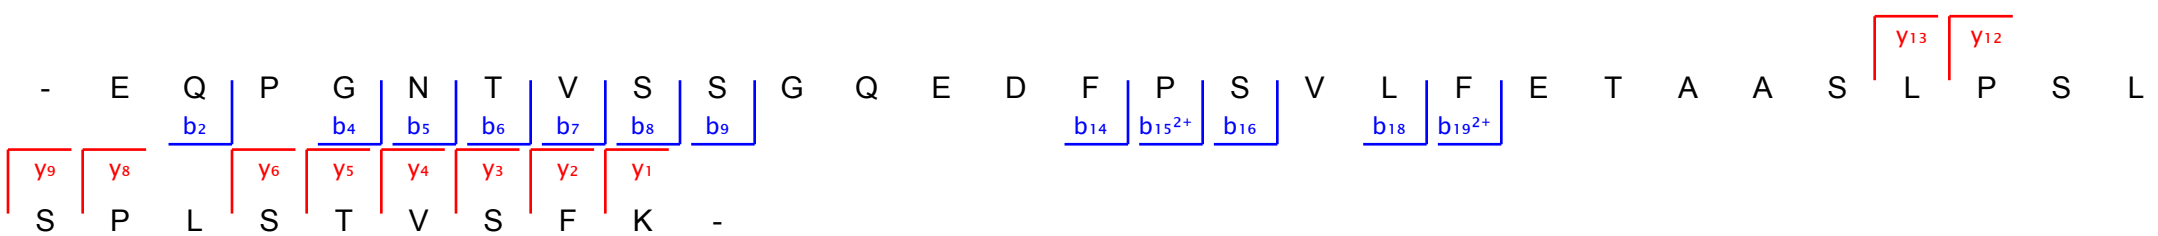

Supplementary Fig. 6  
19 of 52 peptide mass spectra

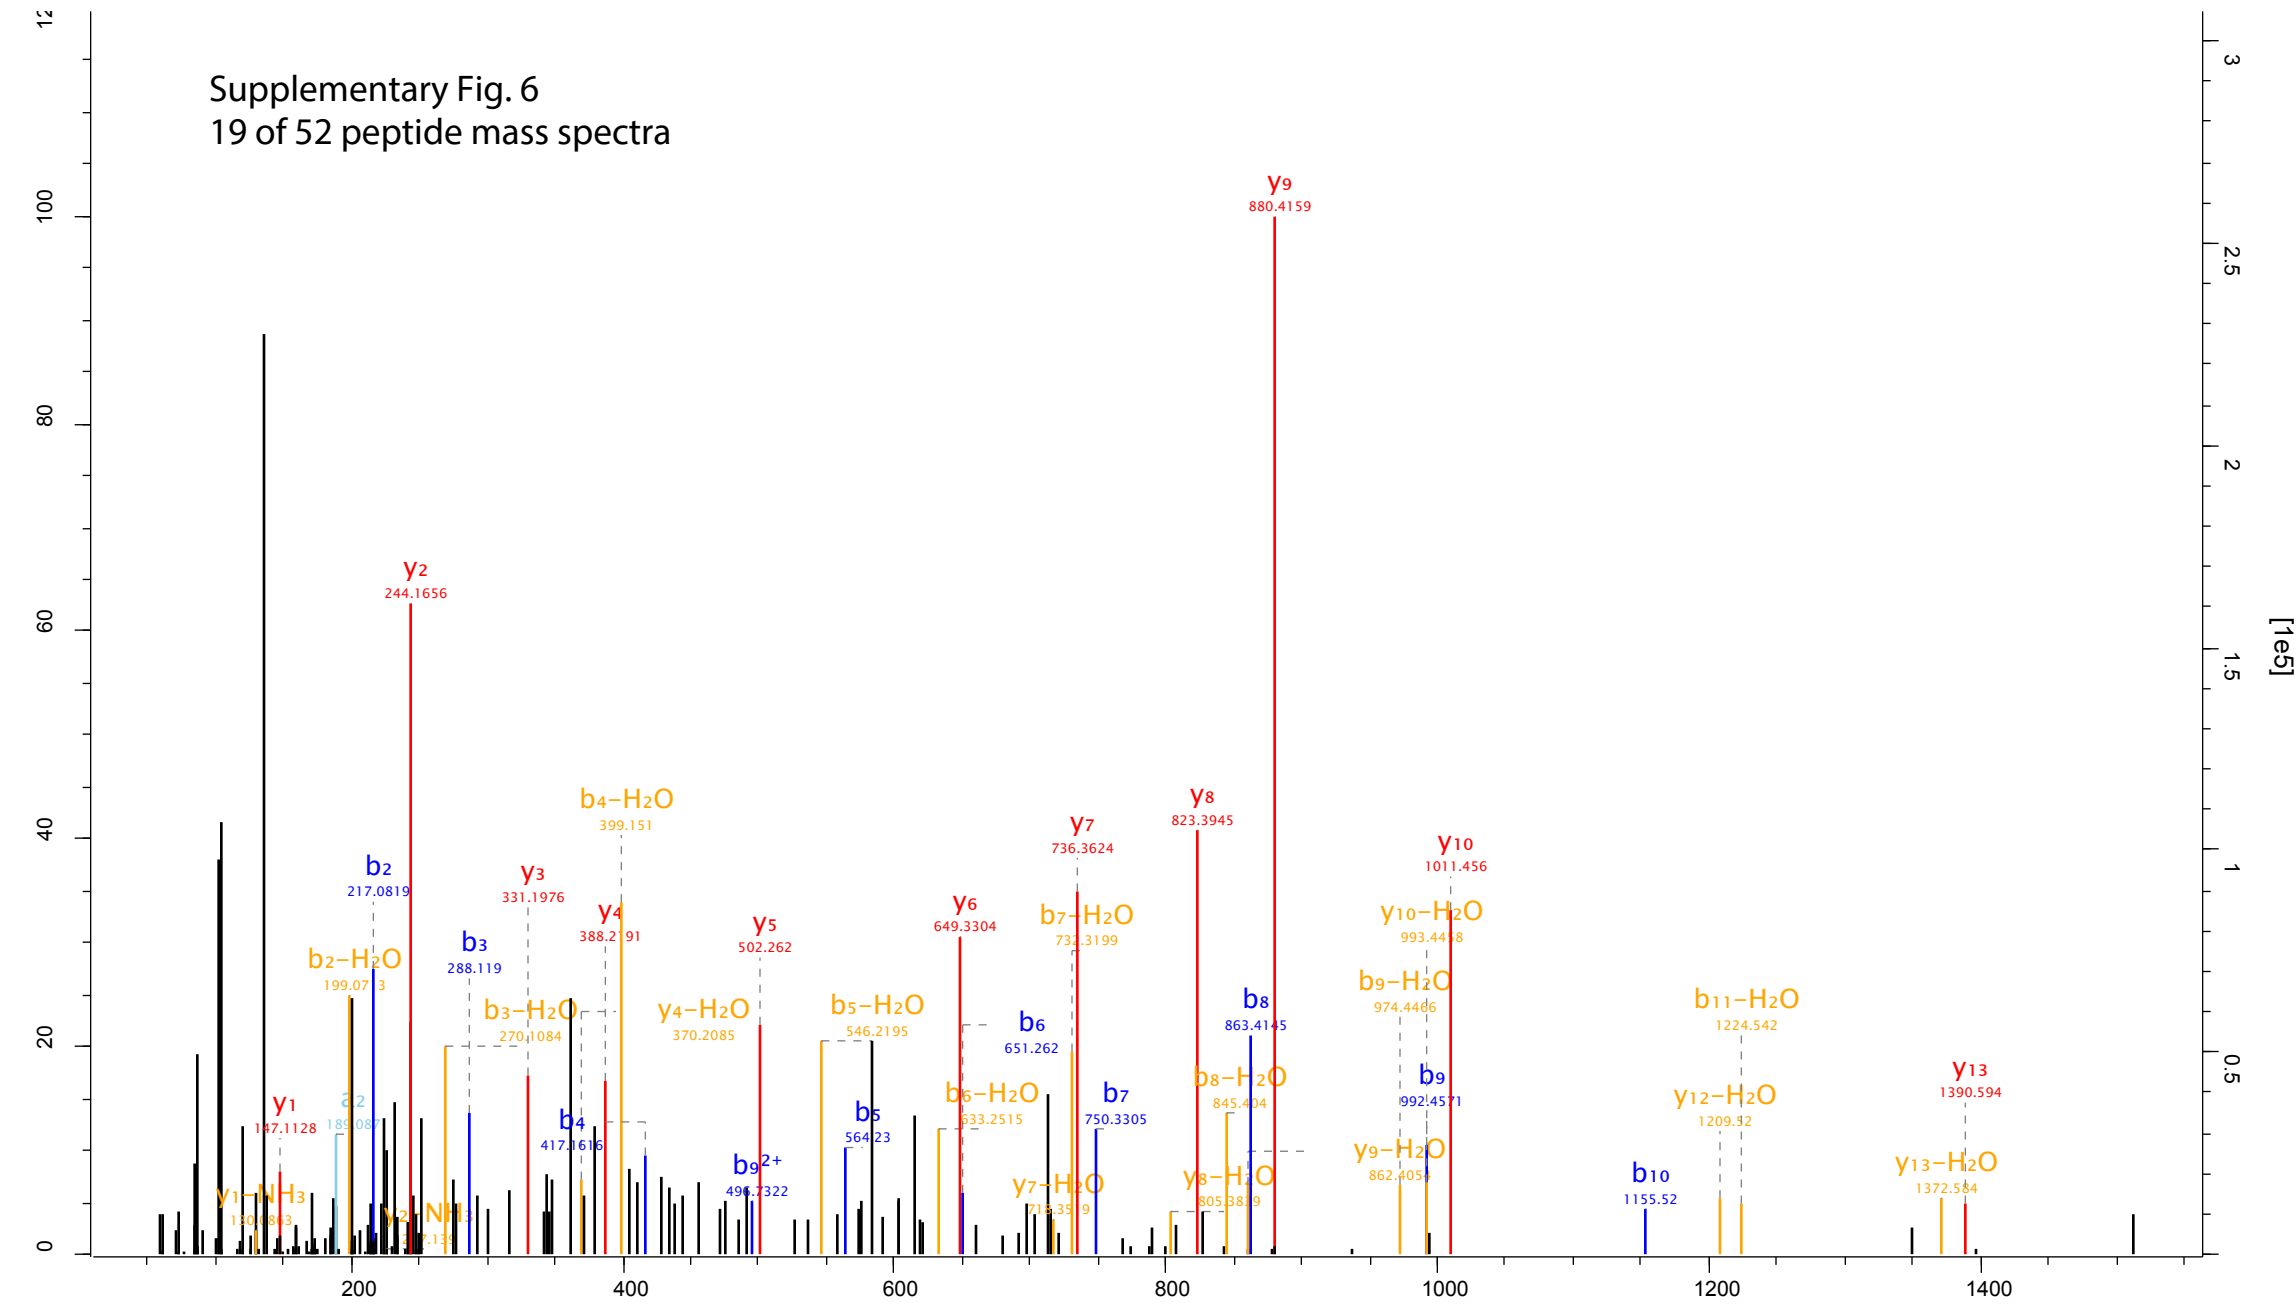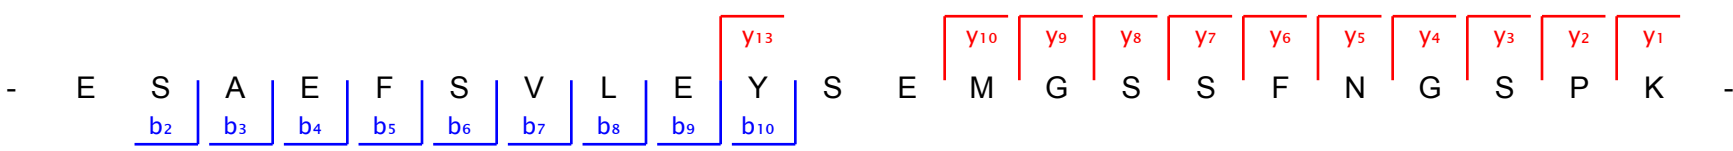

Supplementary Fig. 6  
20 of 52 peptide mass spectra

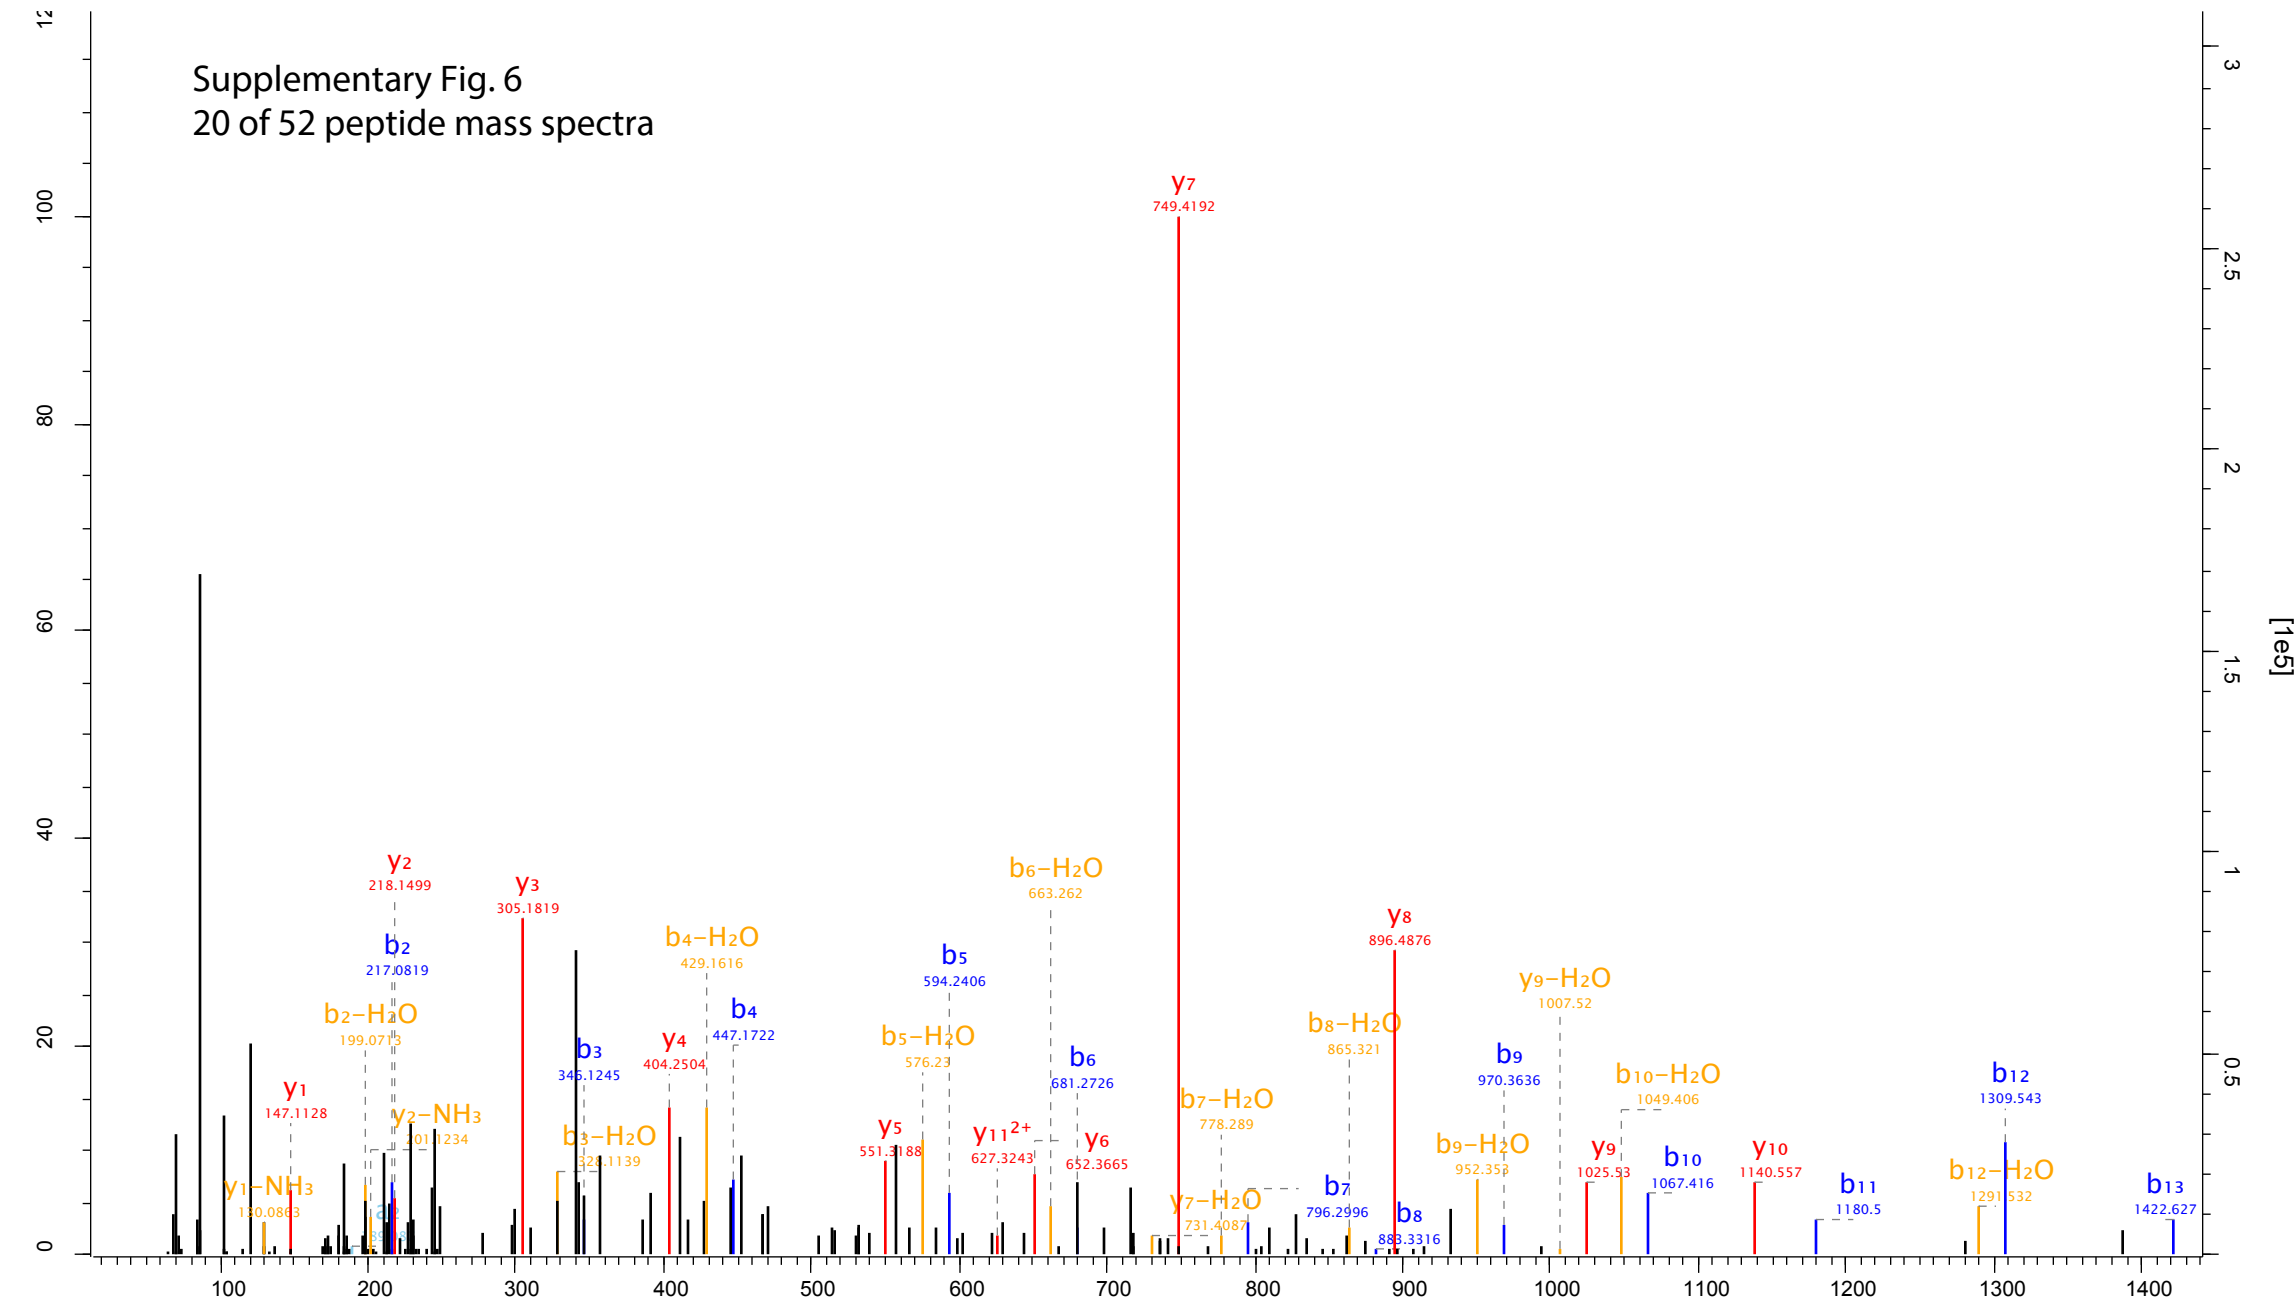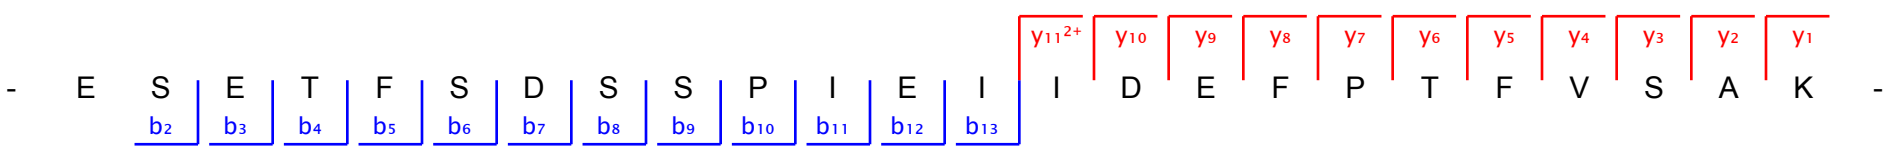



Supplementary Fig. 6  
21 of 52 peptide mass spectra

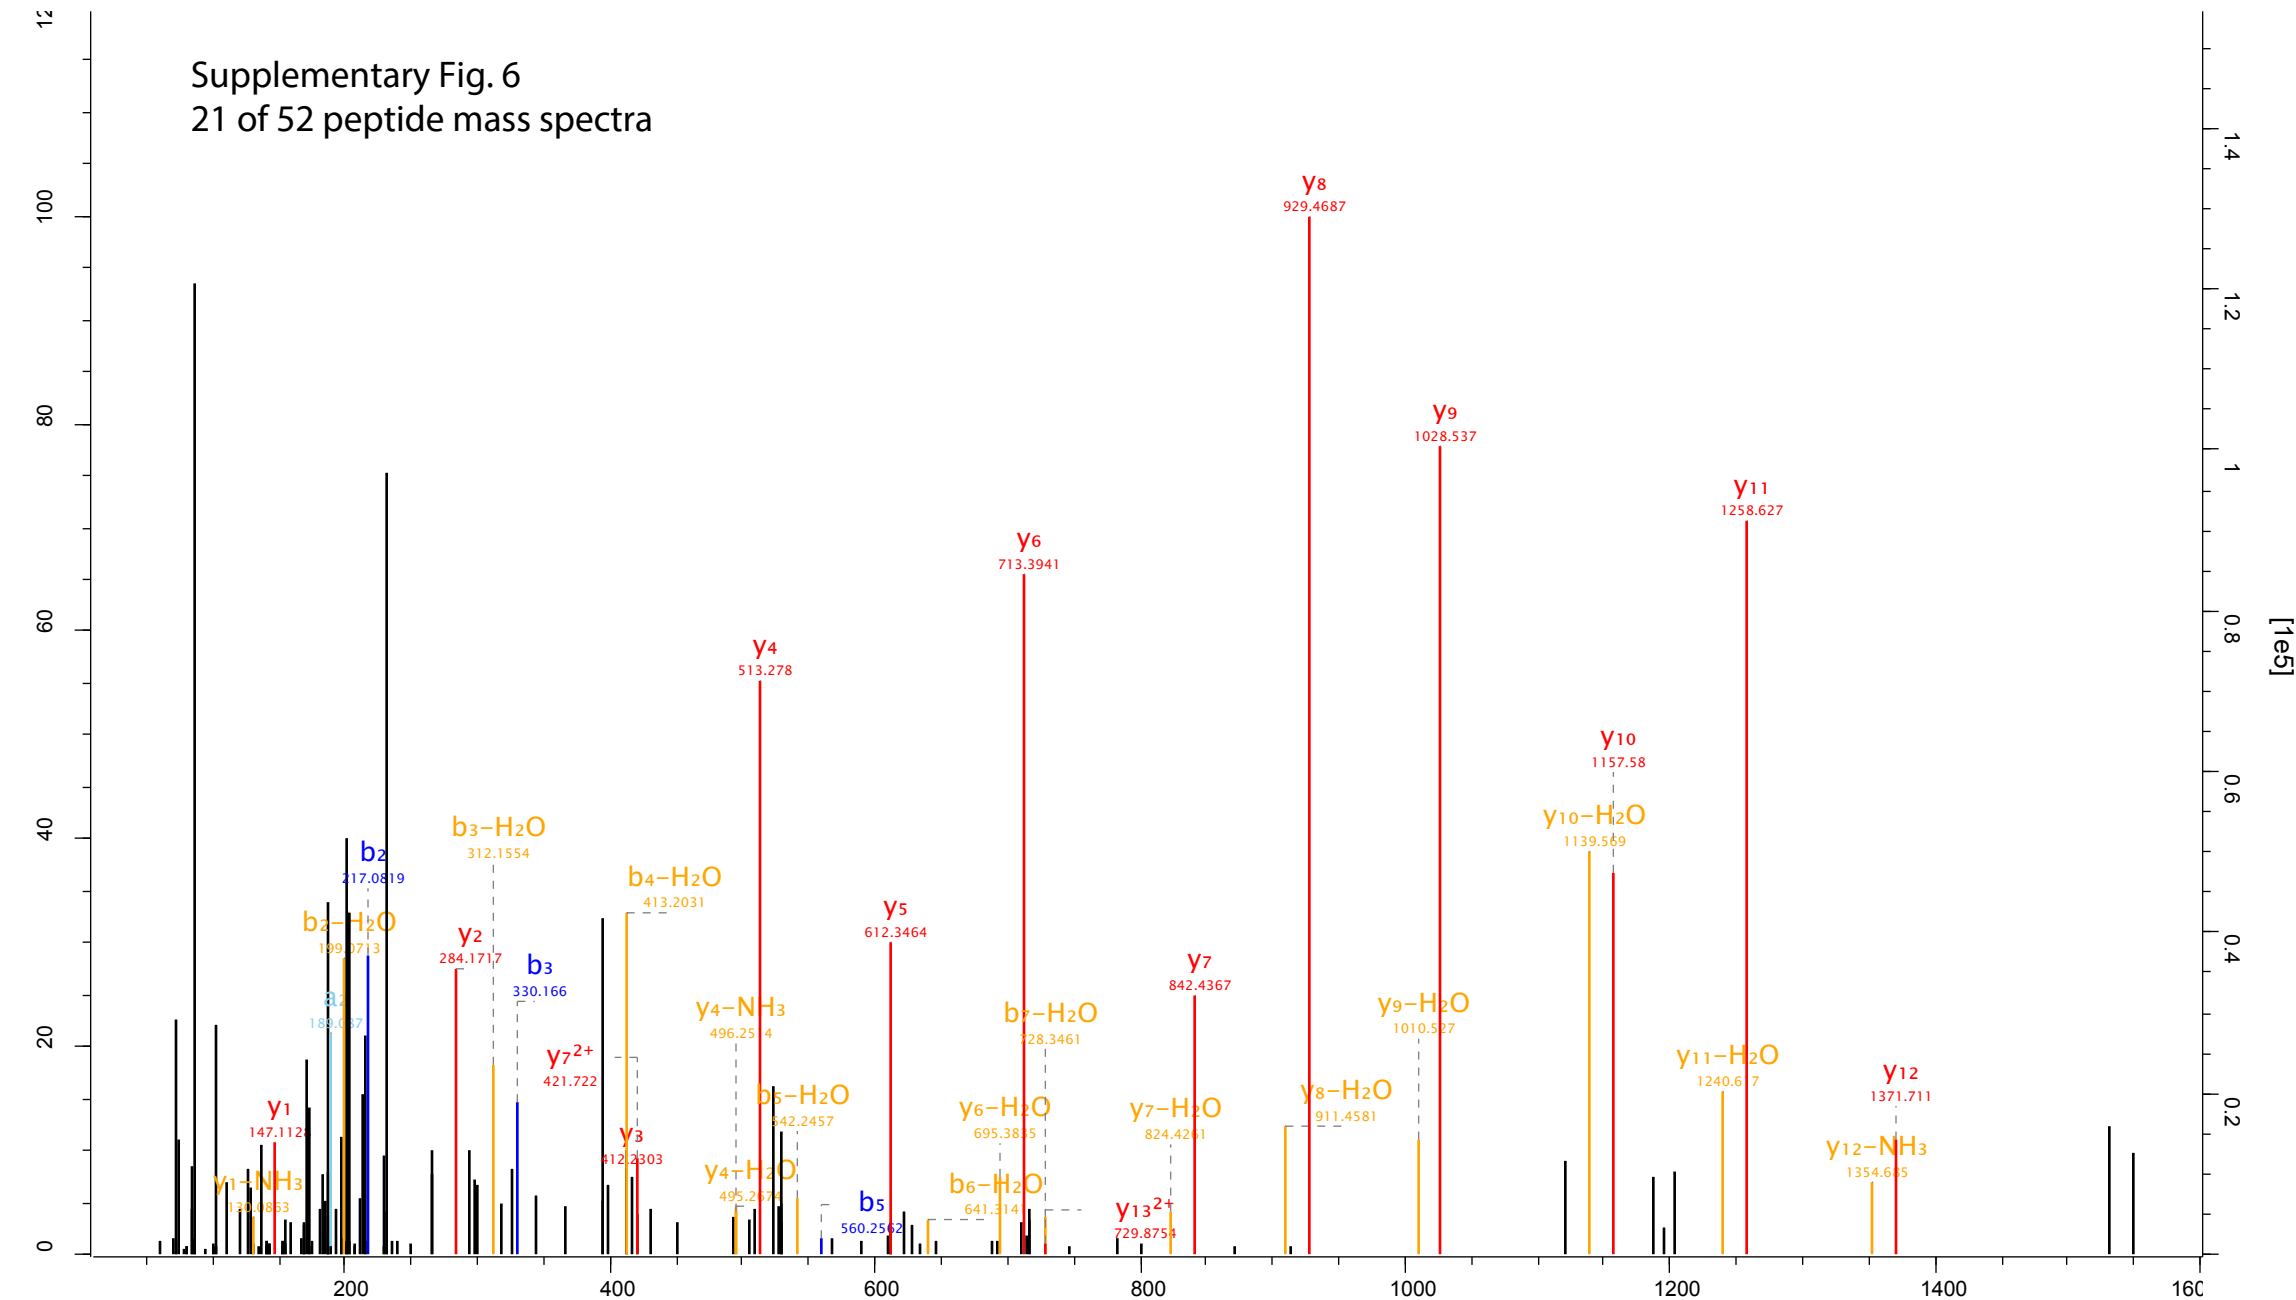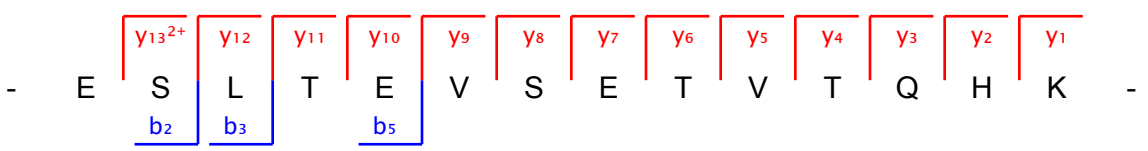

Supplementary Fig. 6  
22 of 52 peptide mass spectra

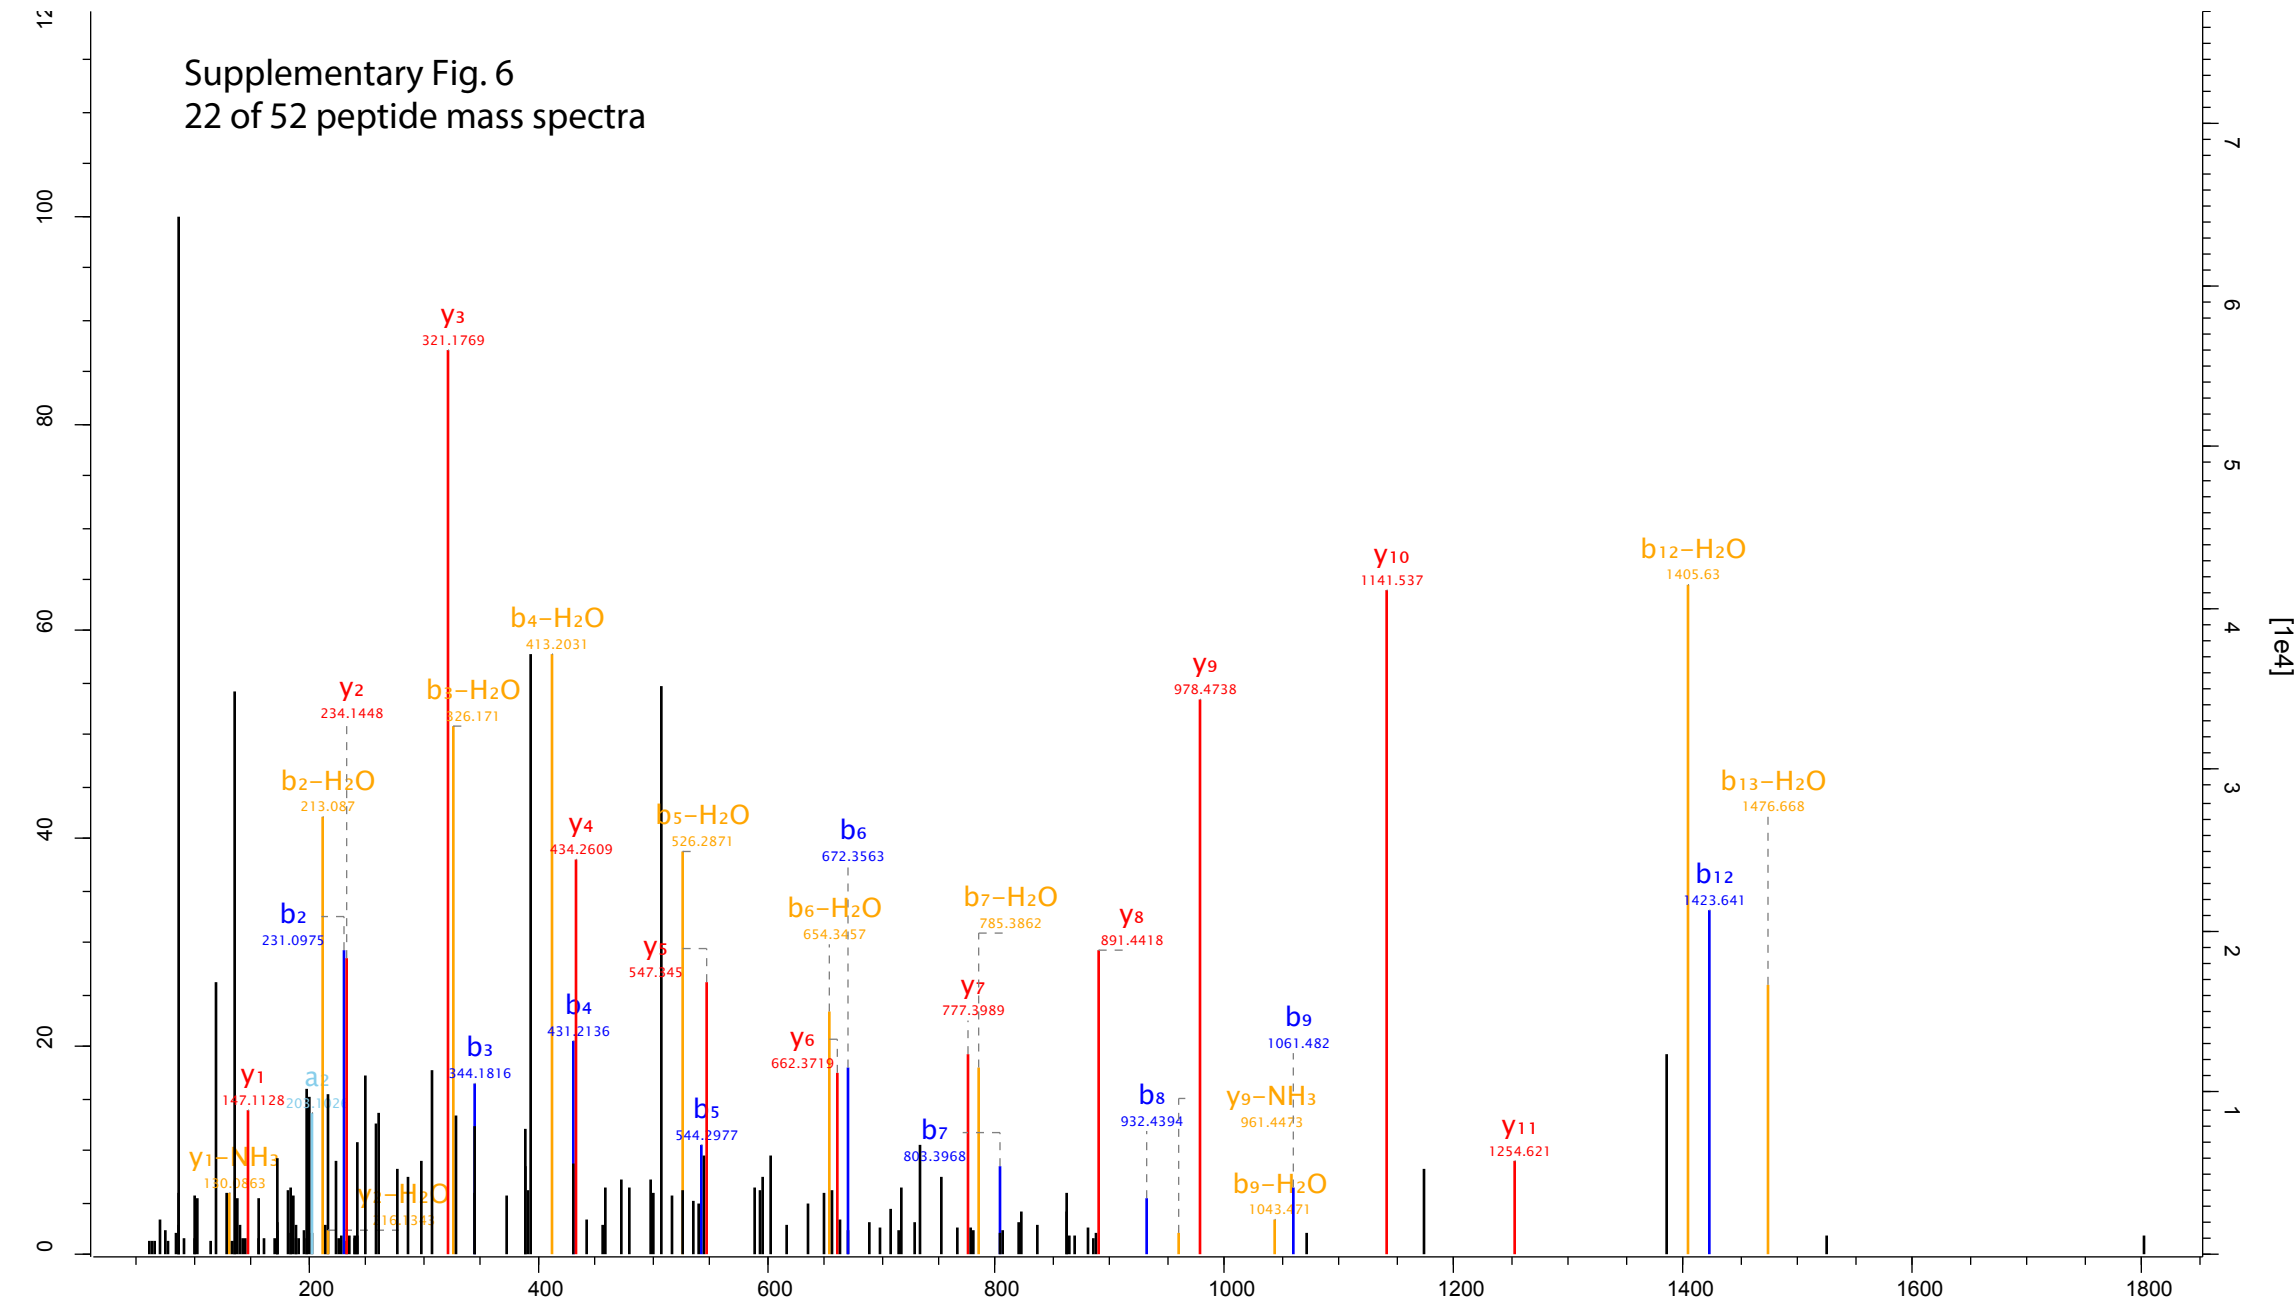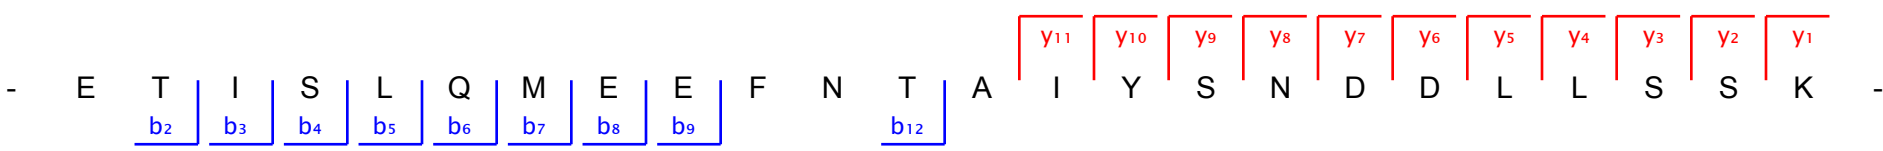

Supplementary Fig. 6  
23 of 52 peptide mass spectra

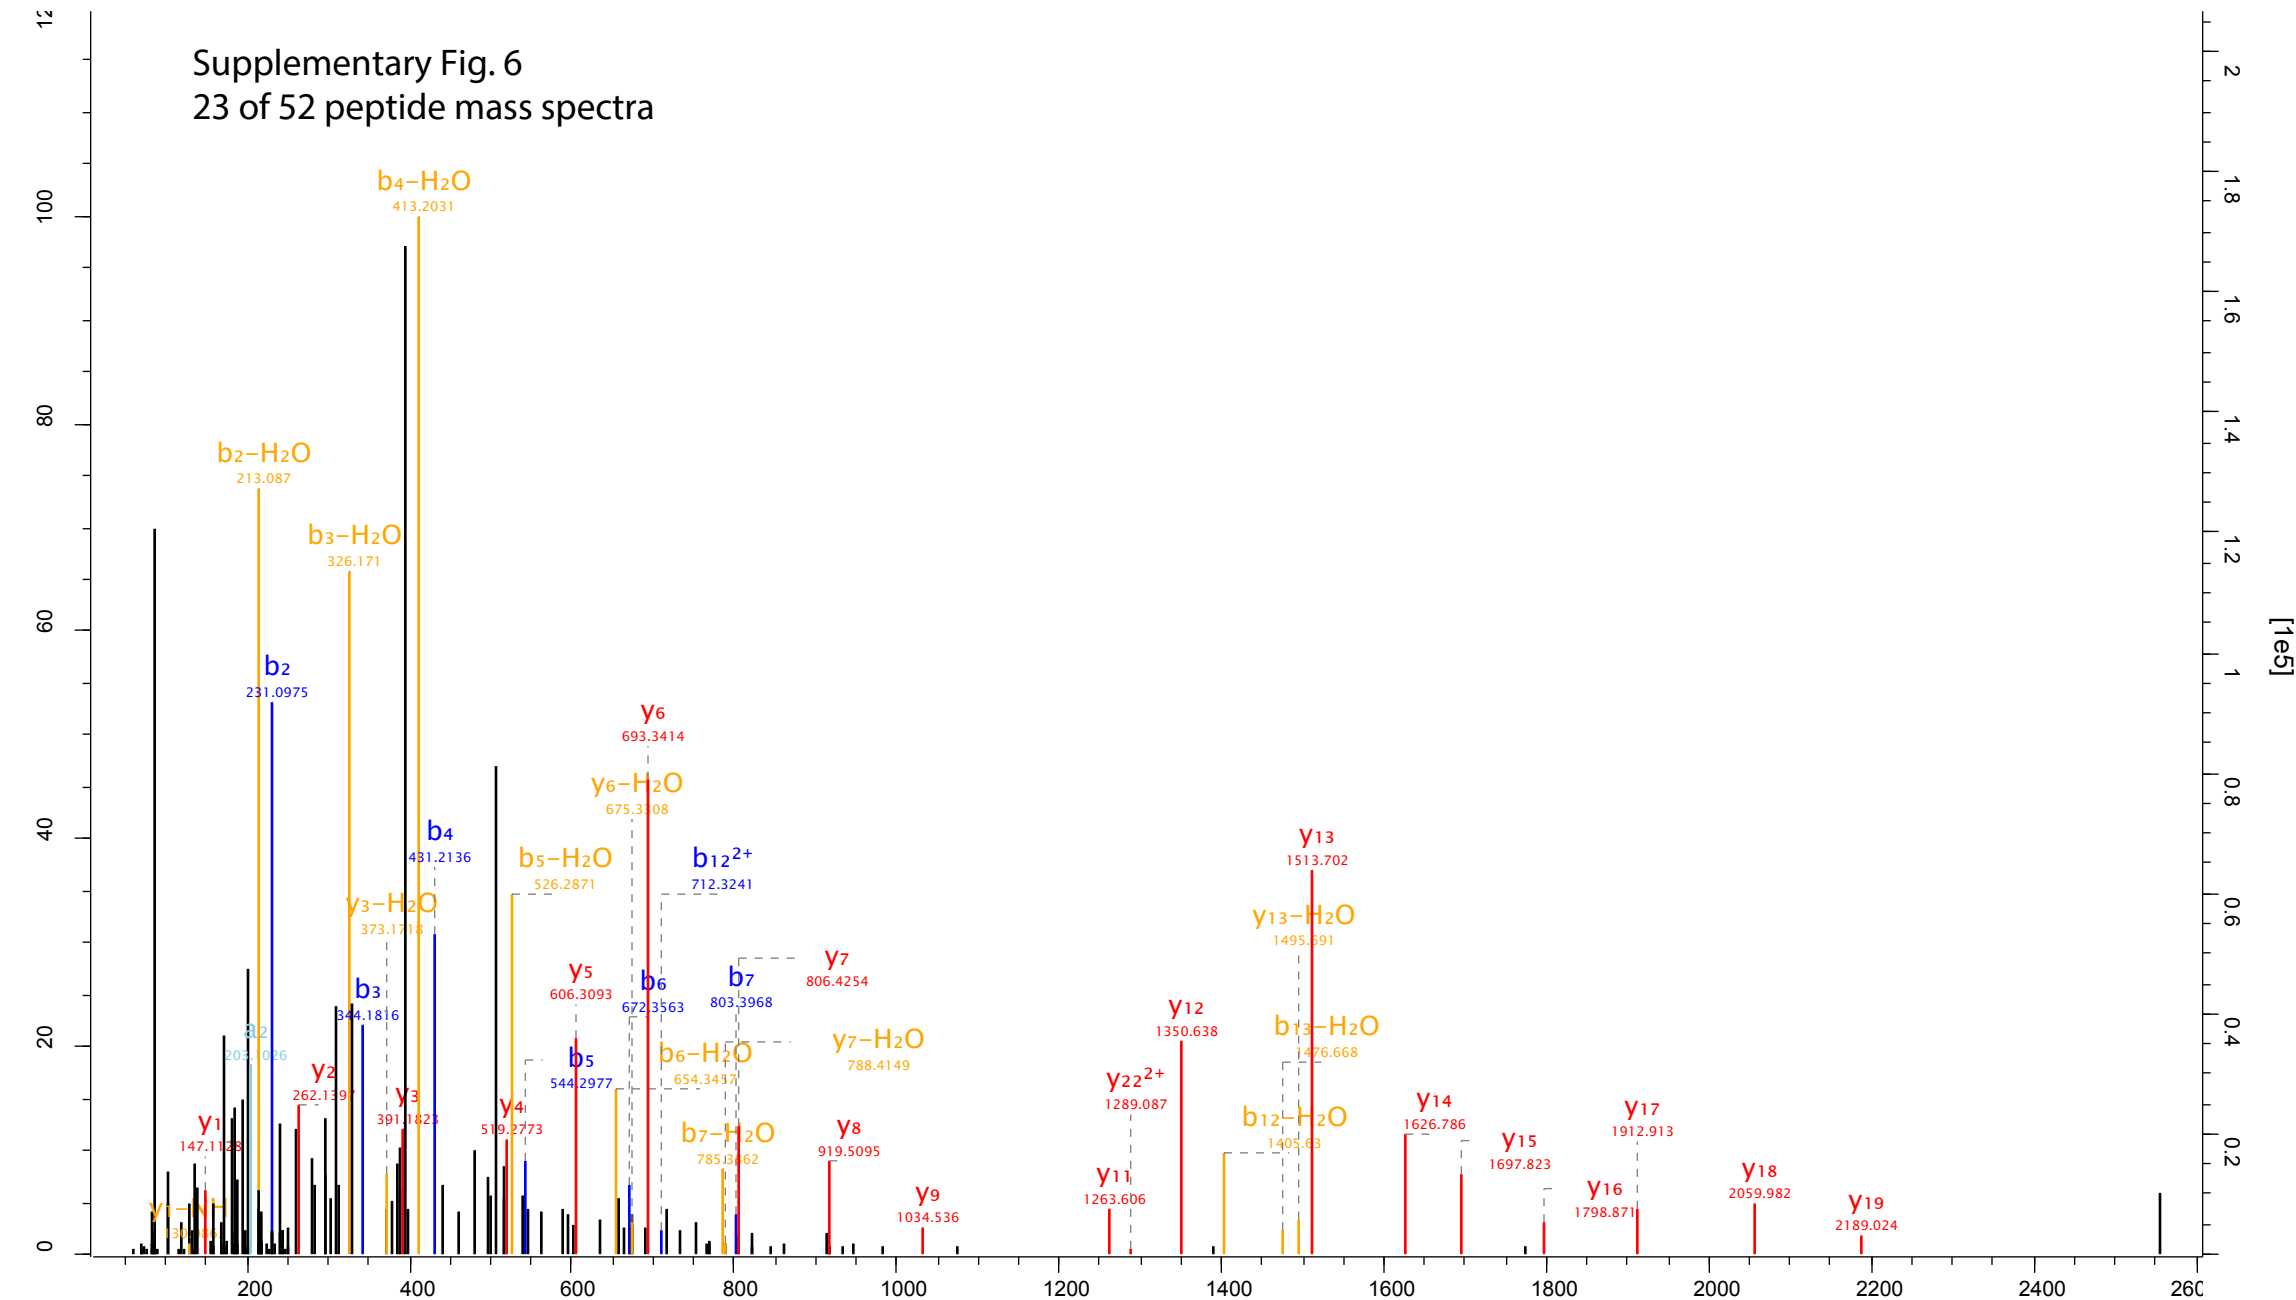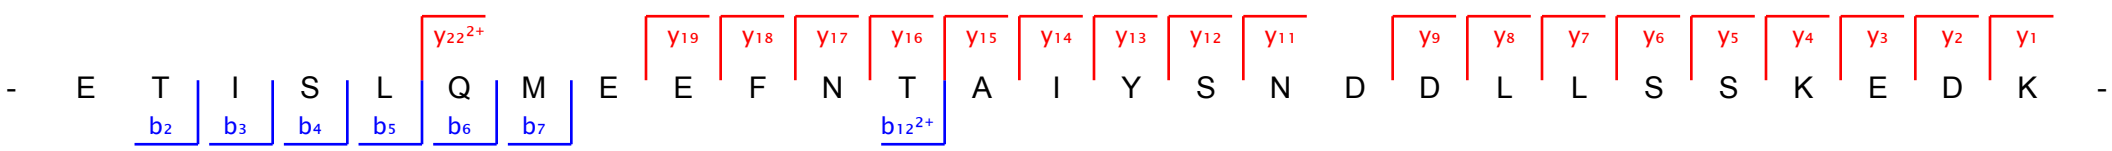

### Supplementary Fig. 6 24 of 52 peptide mass spectra

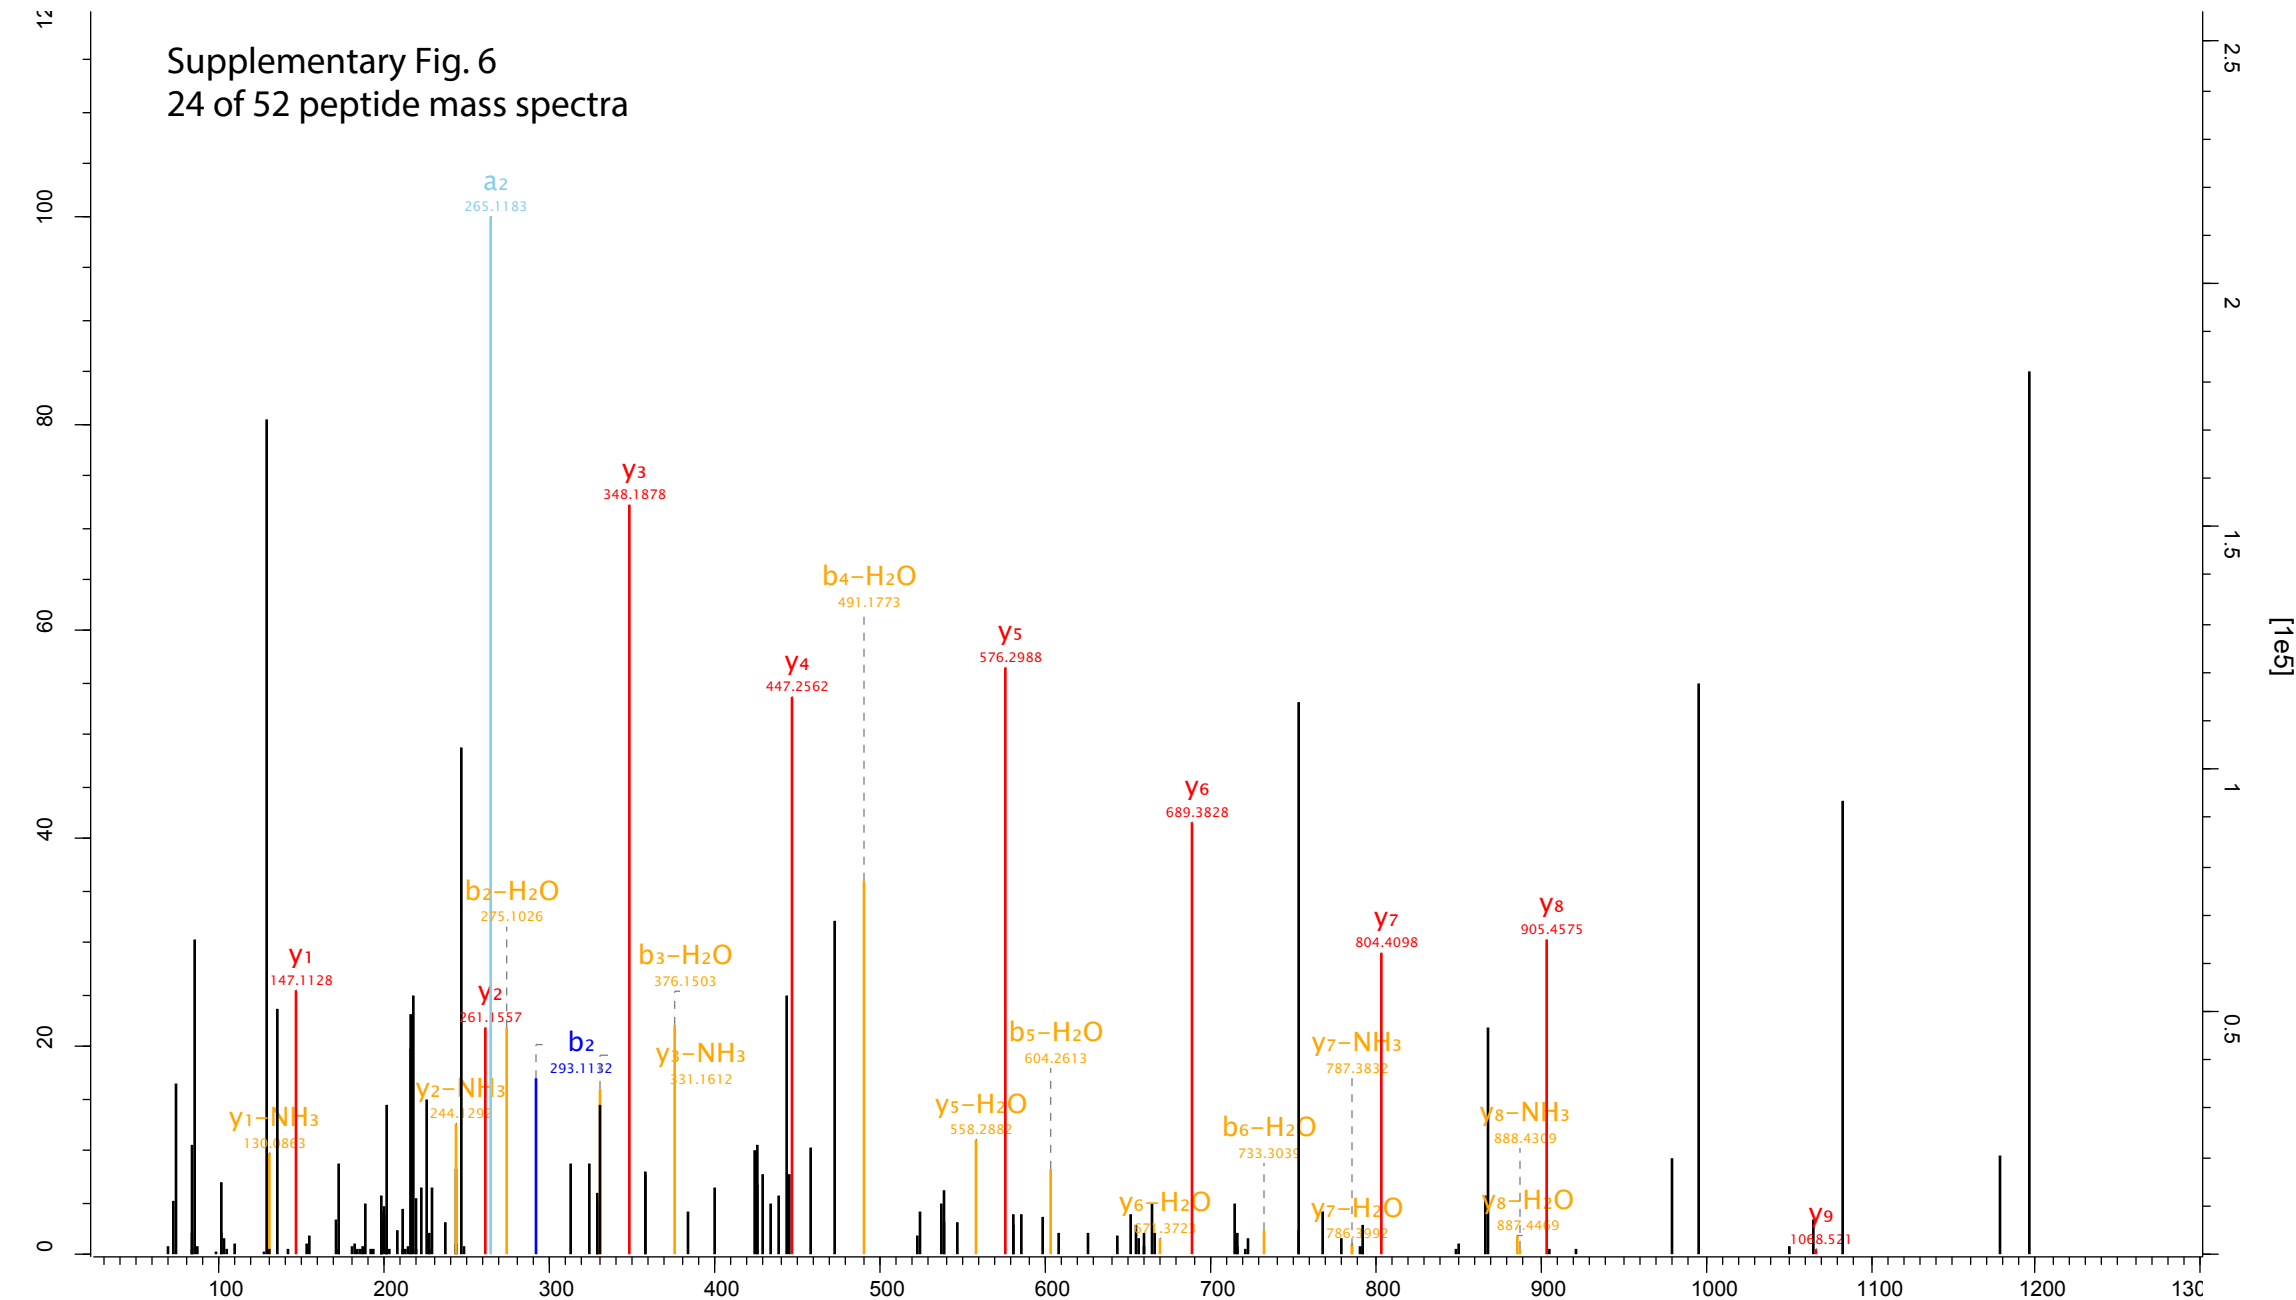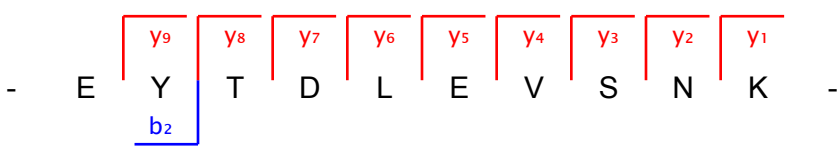

Supplementary Fig. 6  
25 of 52 peptide mass spectra

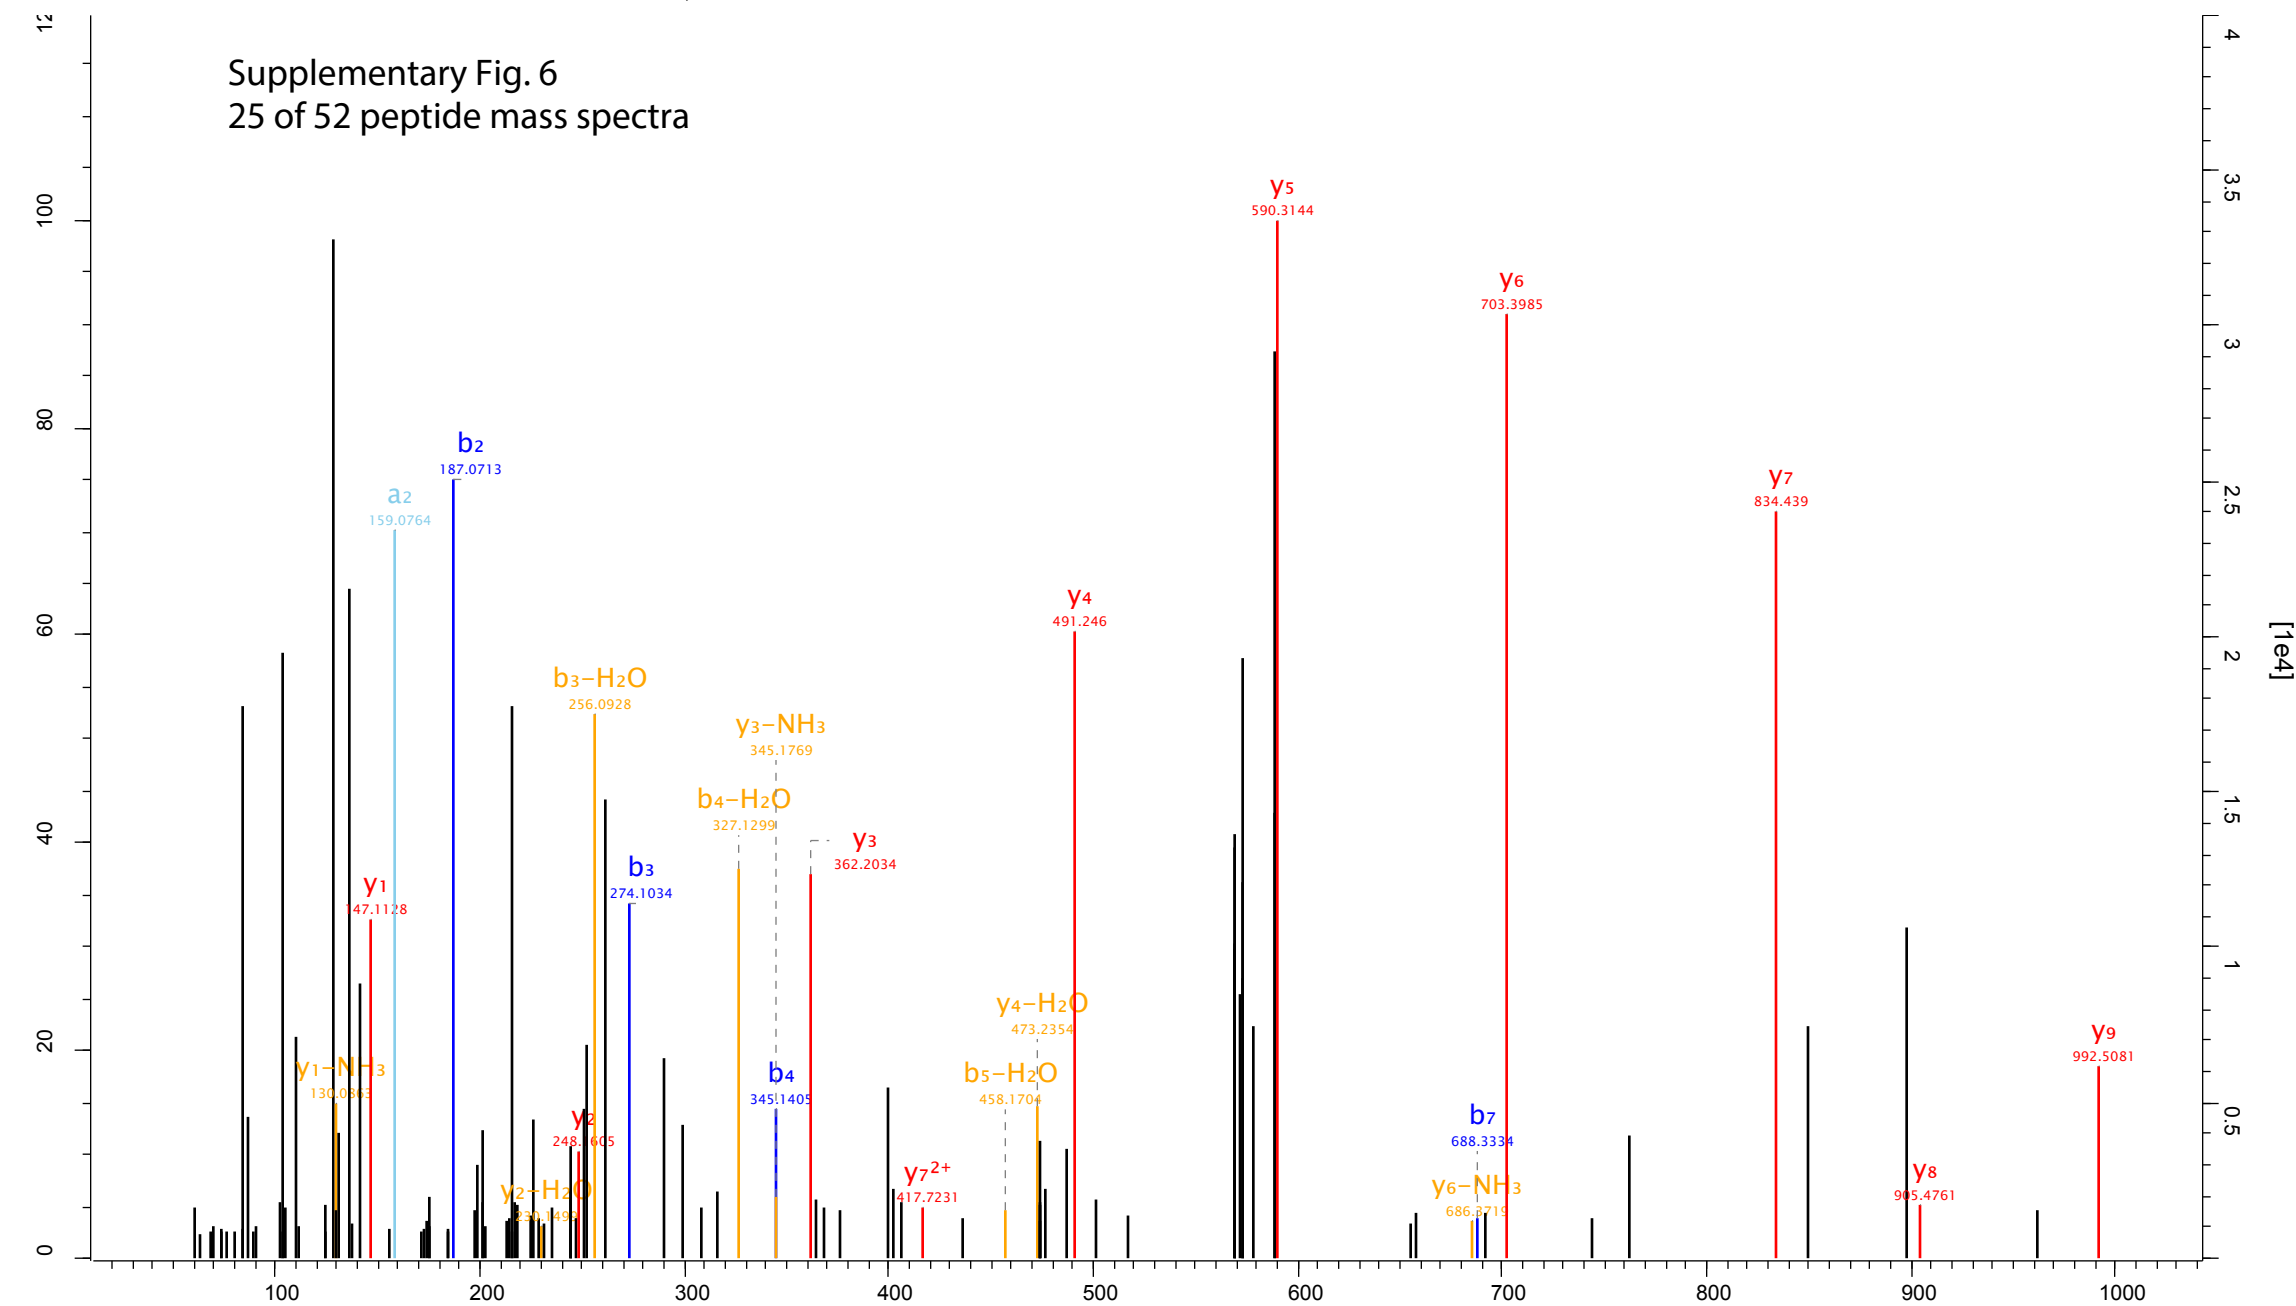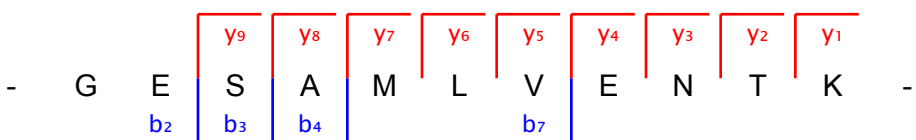

Supplementary Fig. 6  
26 of 52 peptide mass spectra

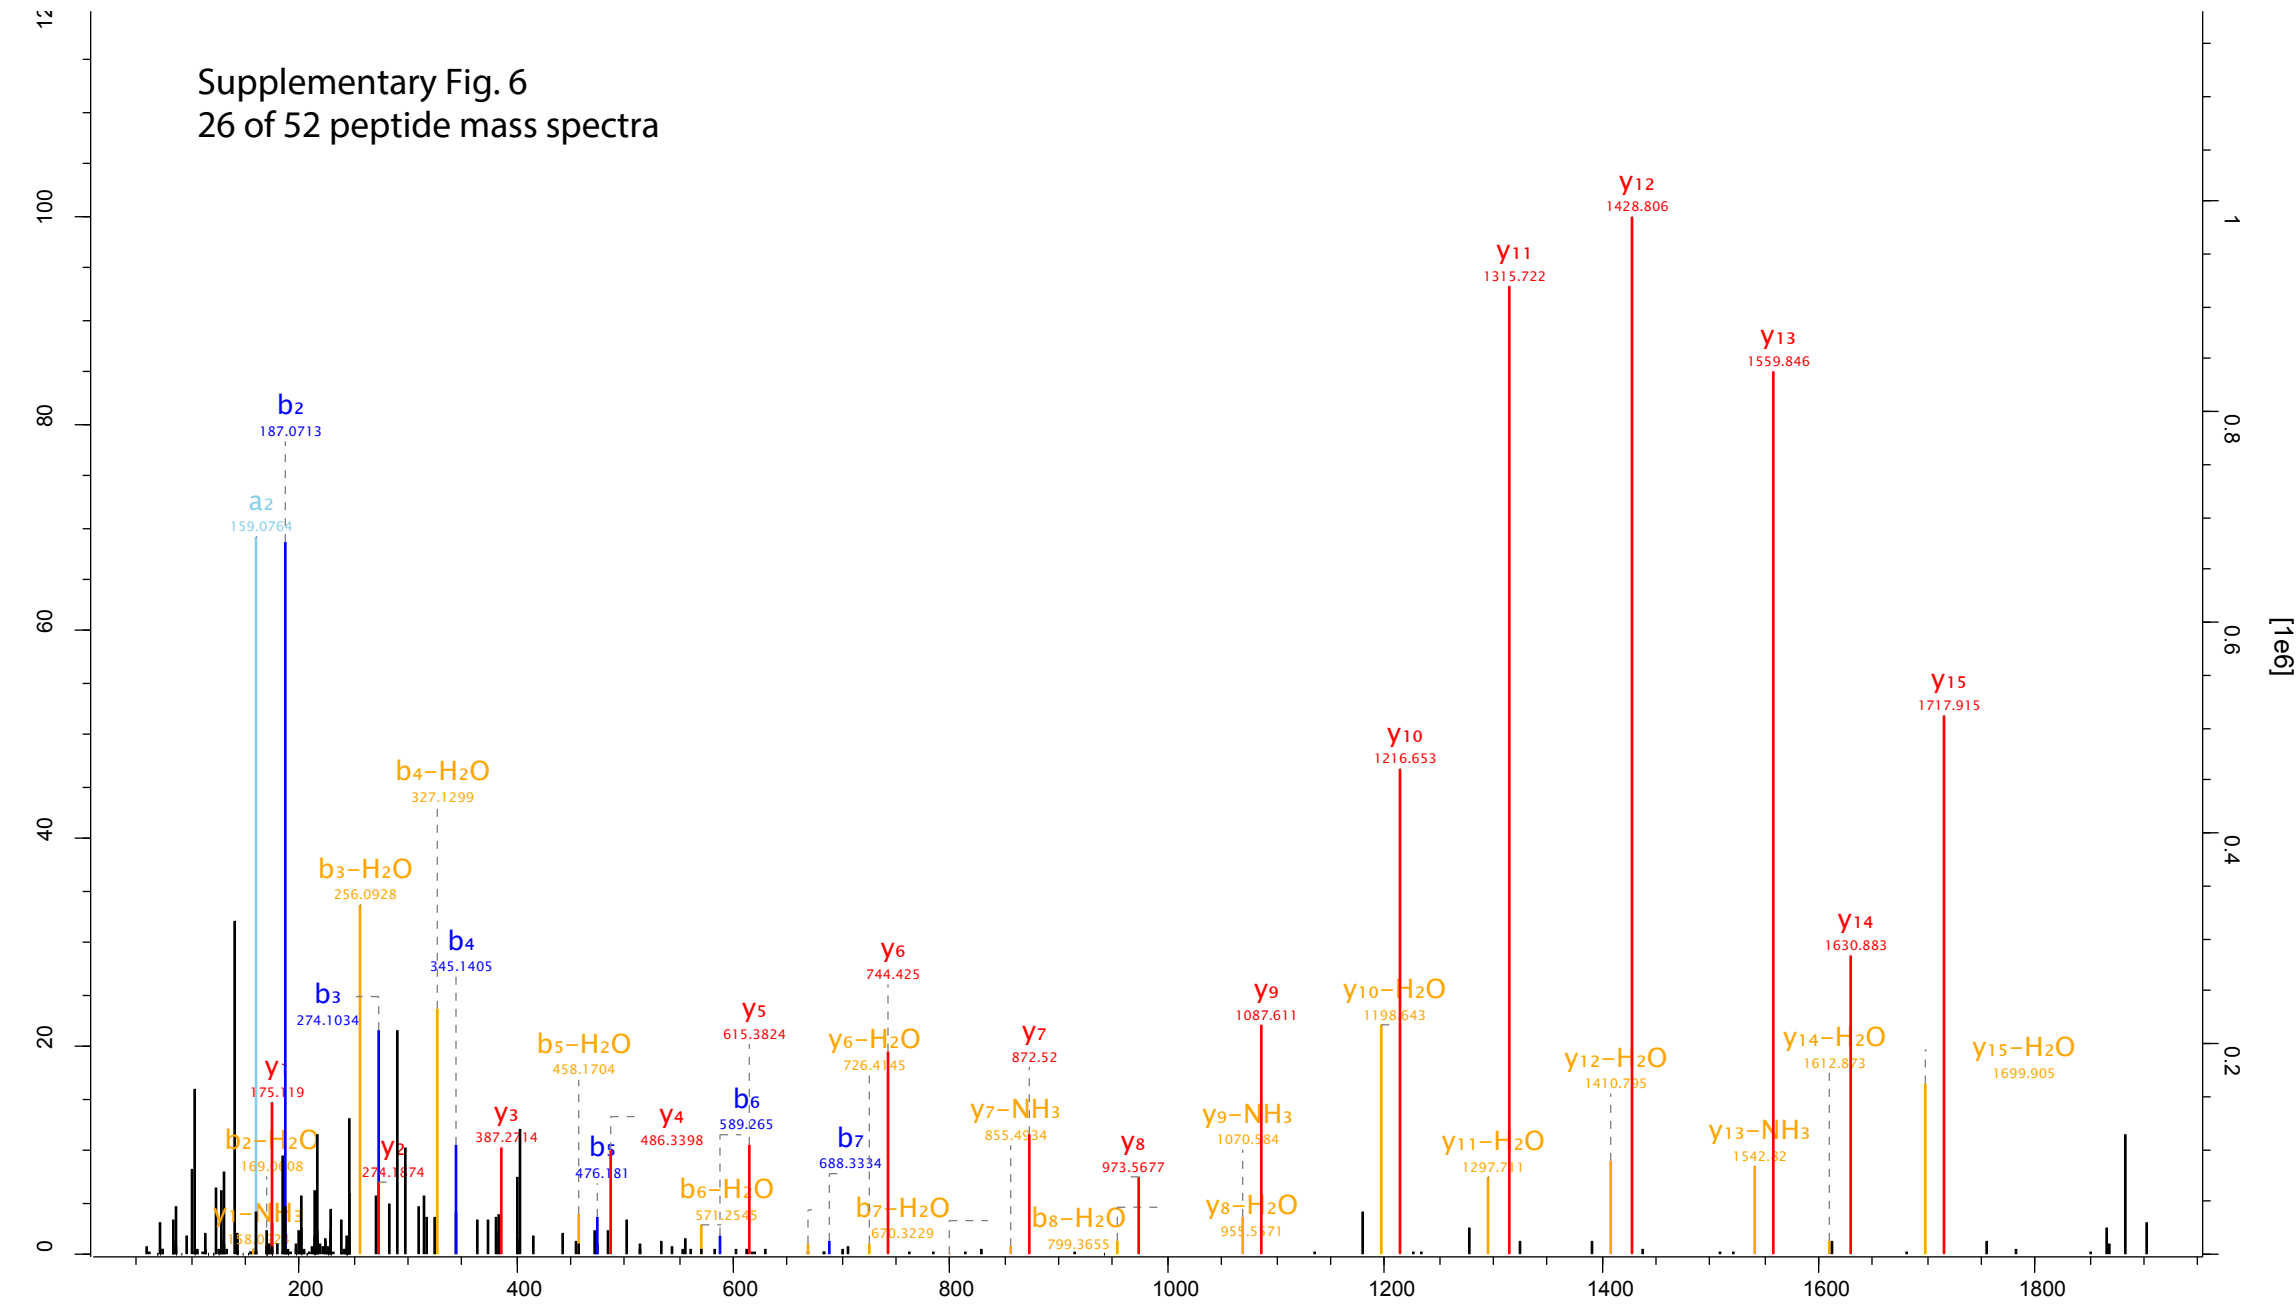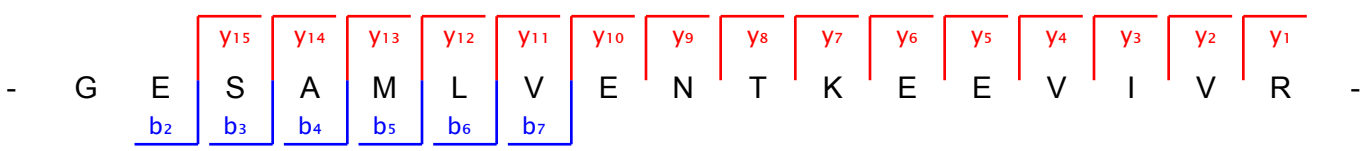

Supplementary Fig. 6  
27 of 52 peptide mass spectra

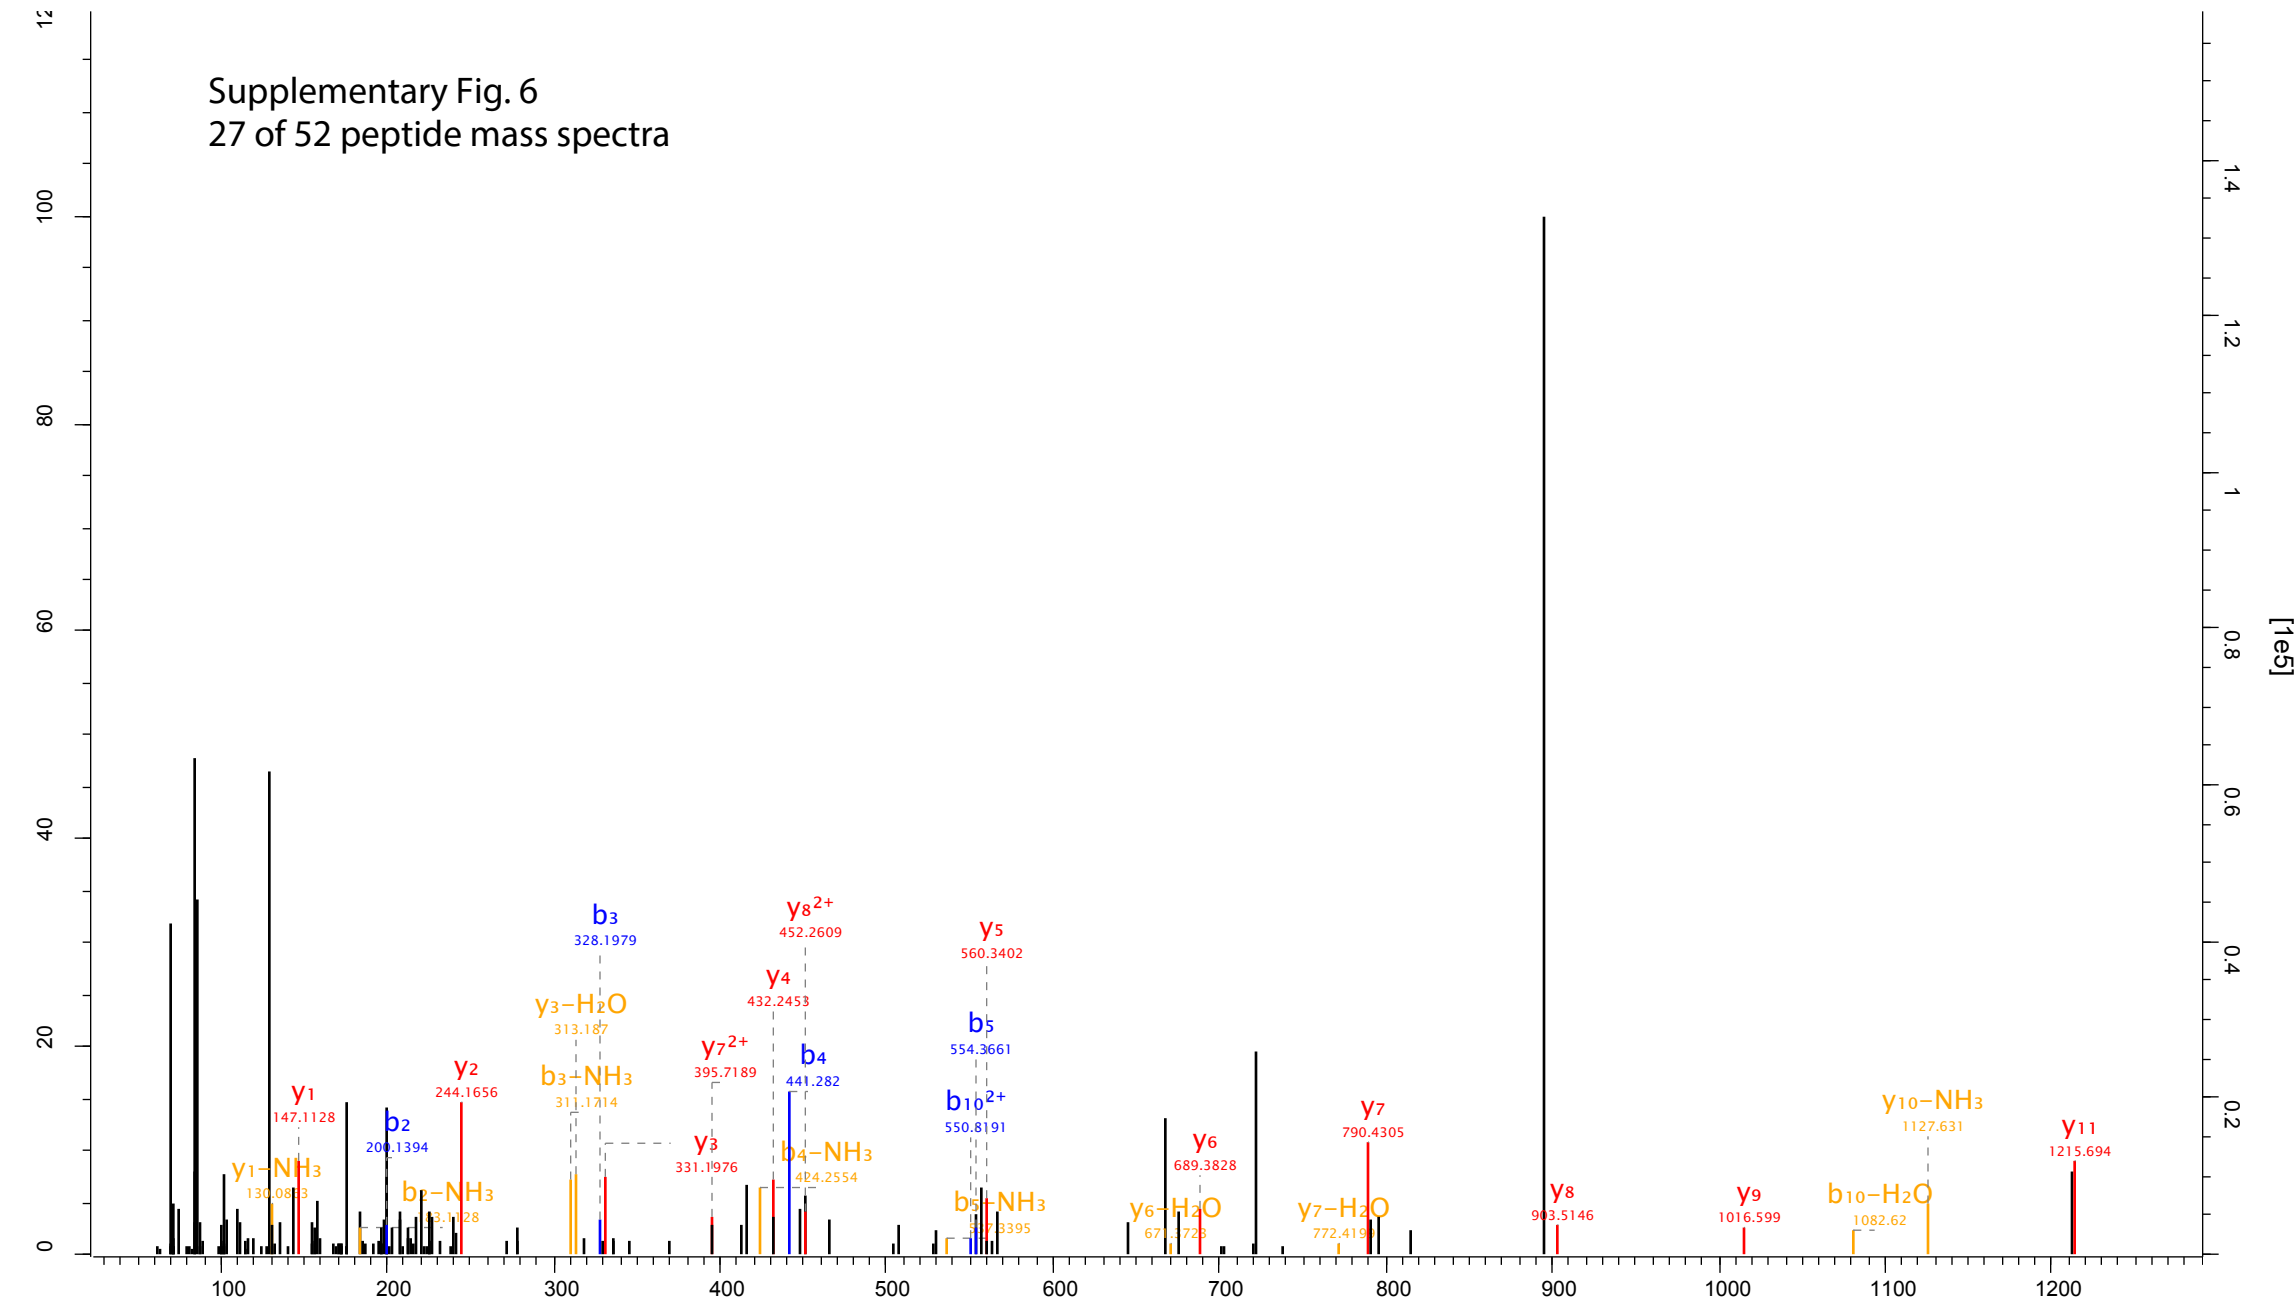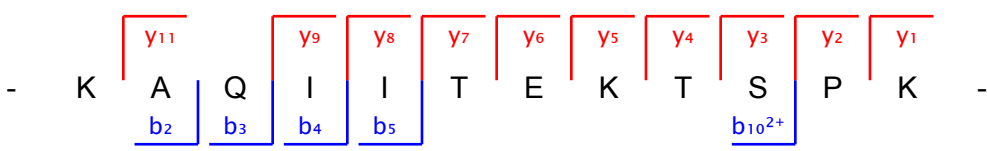

Supplementary Fig. 6  
28 of 52 peptide mass spectra

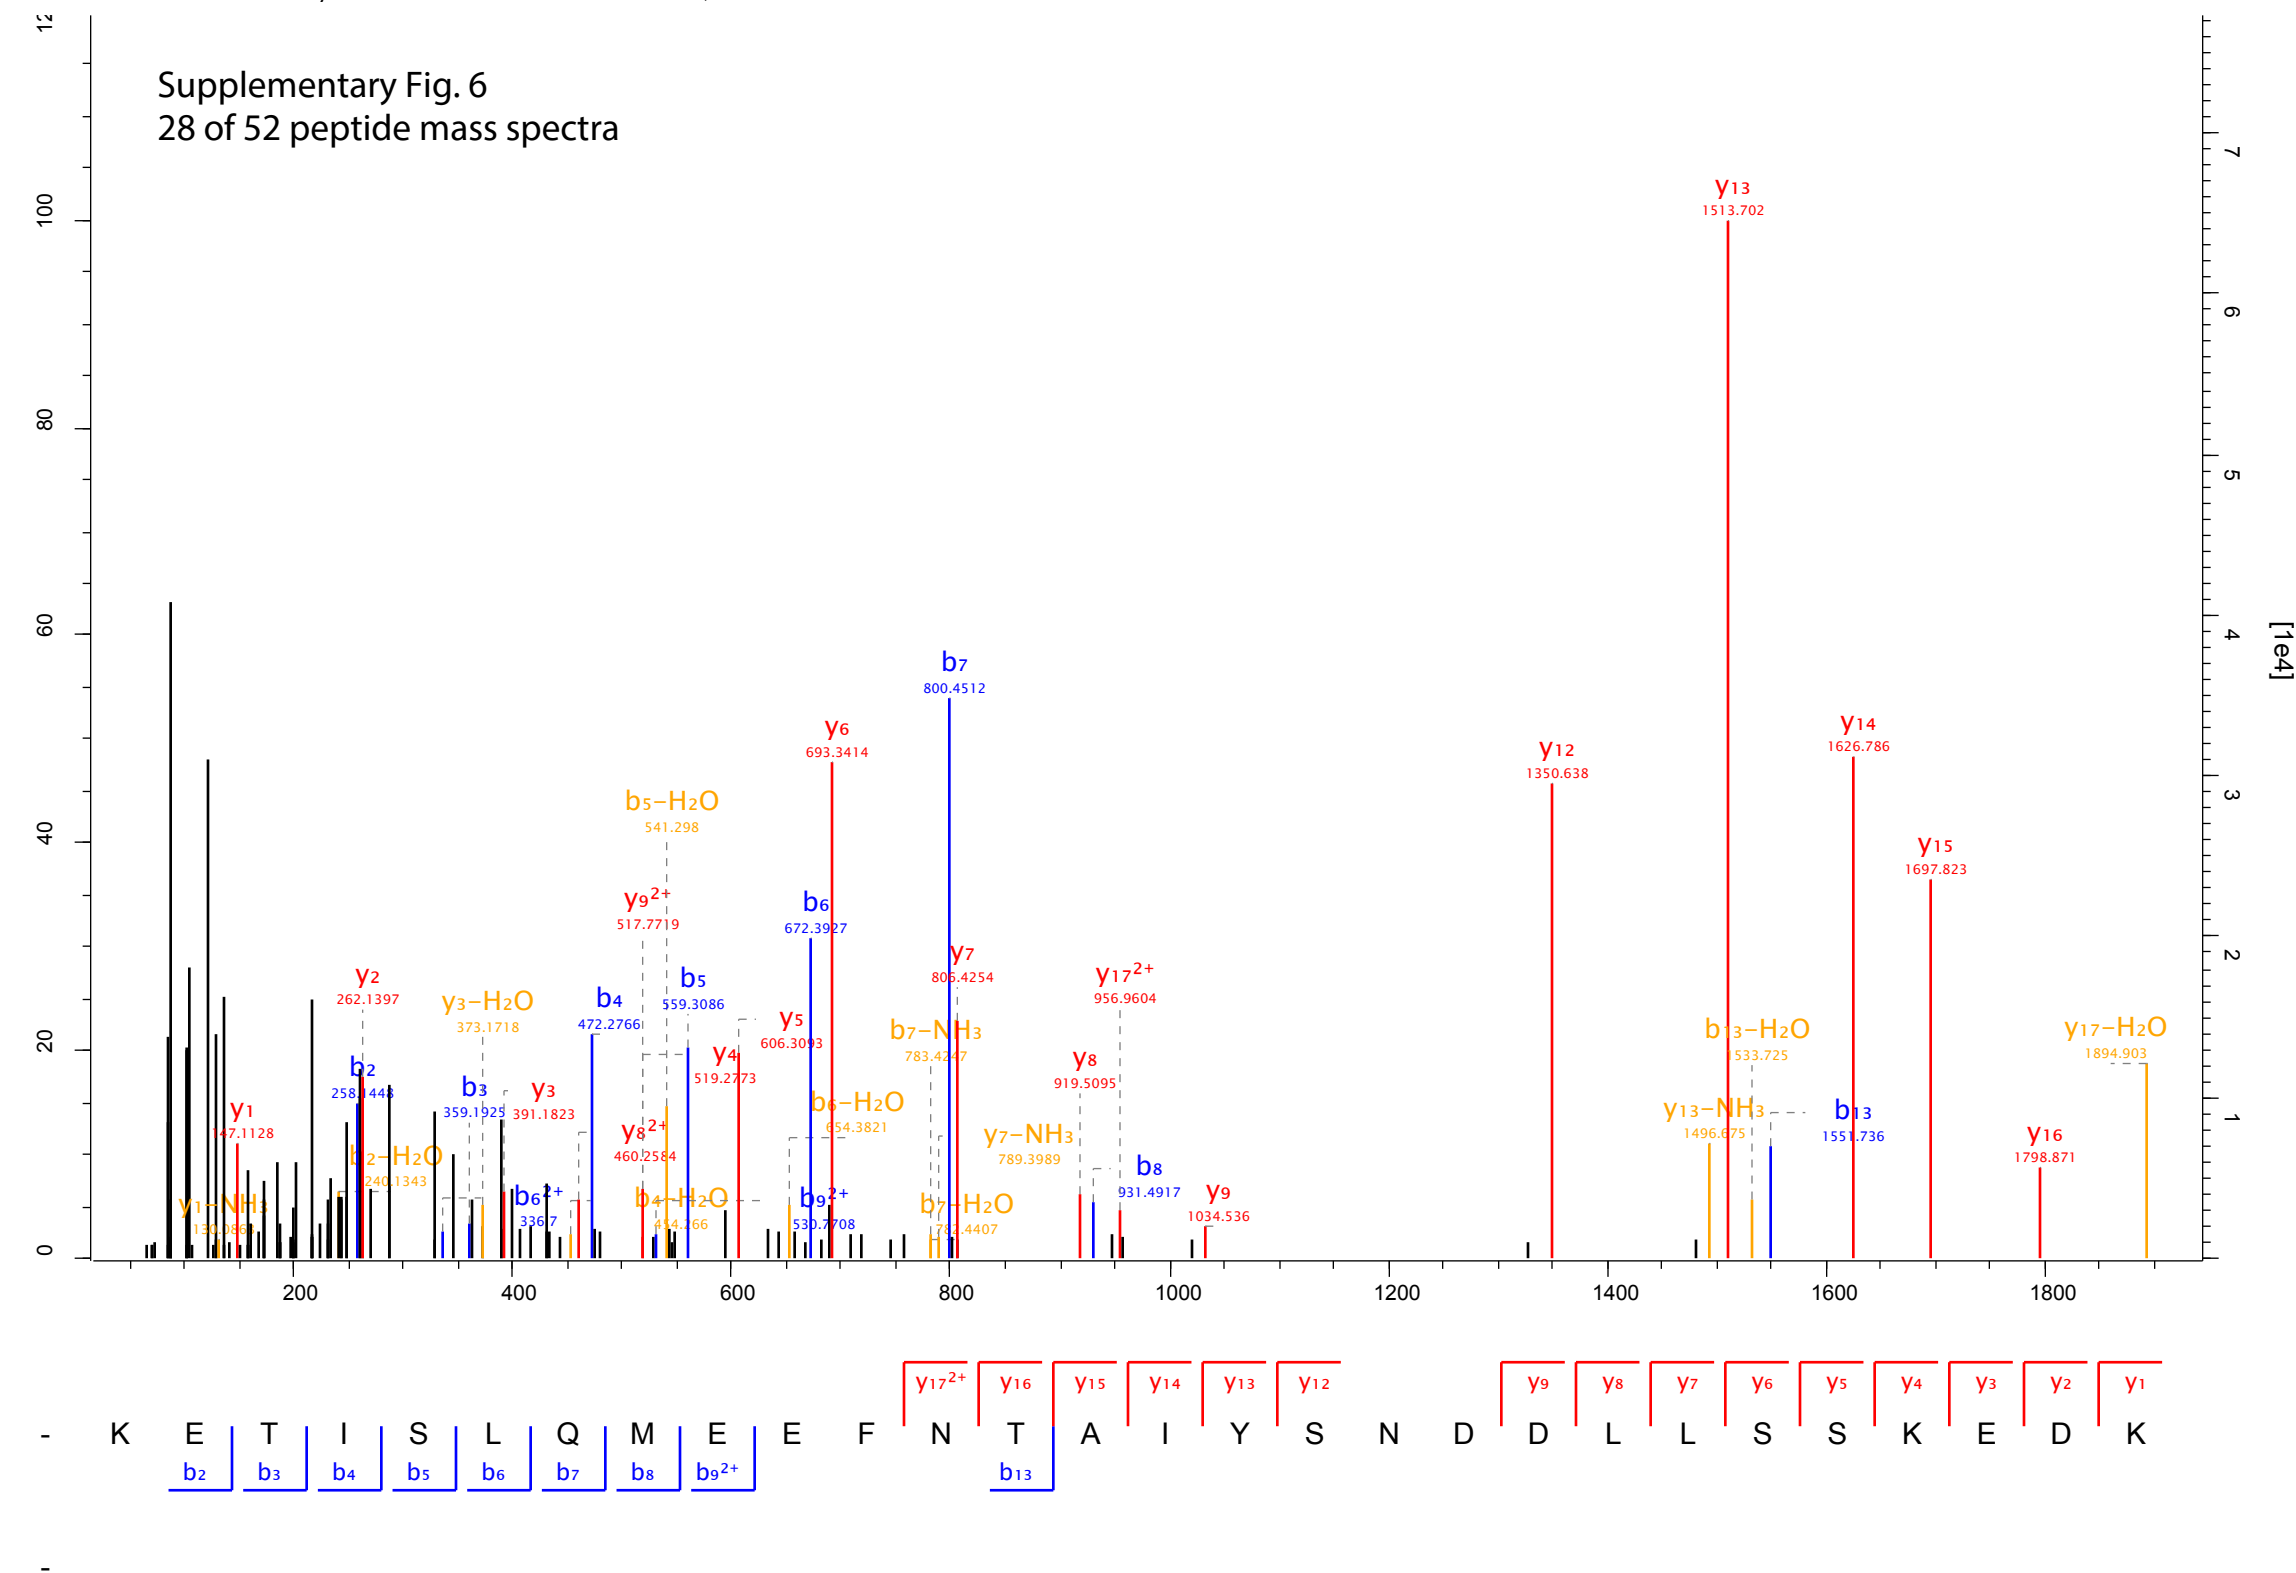



Supplementary Fig. 6  
29 of 52 peptide mass spectra

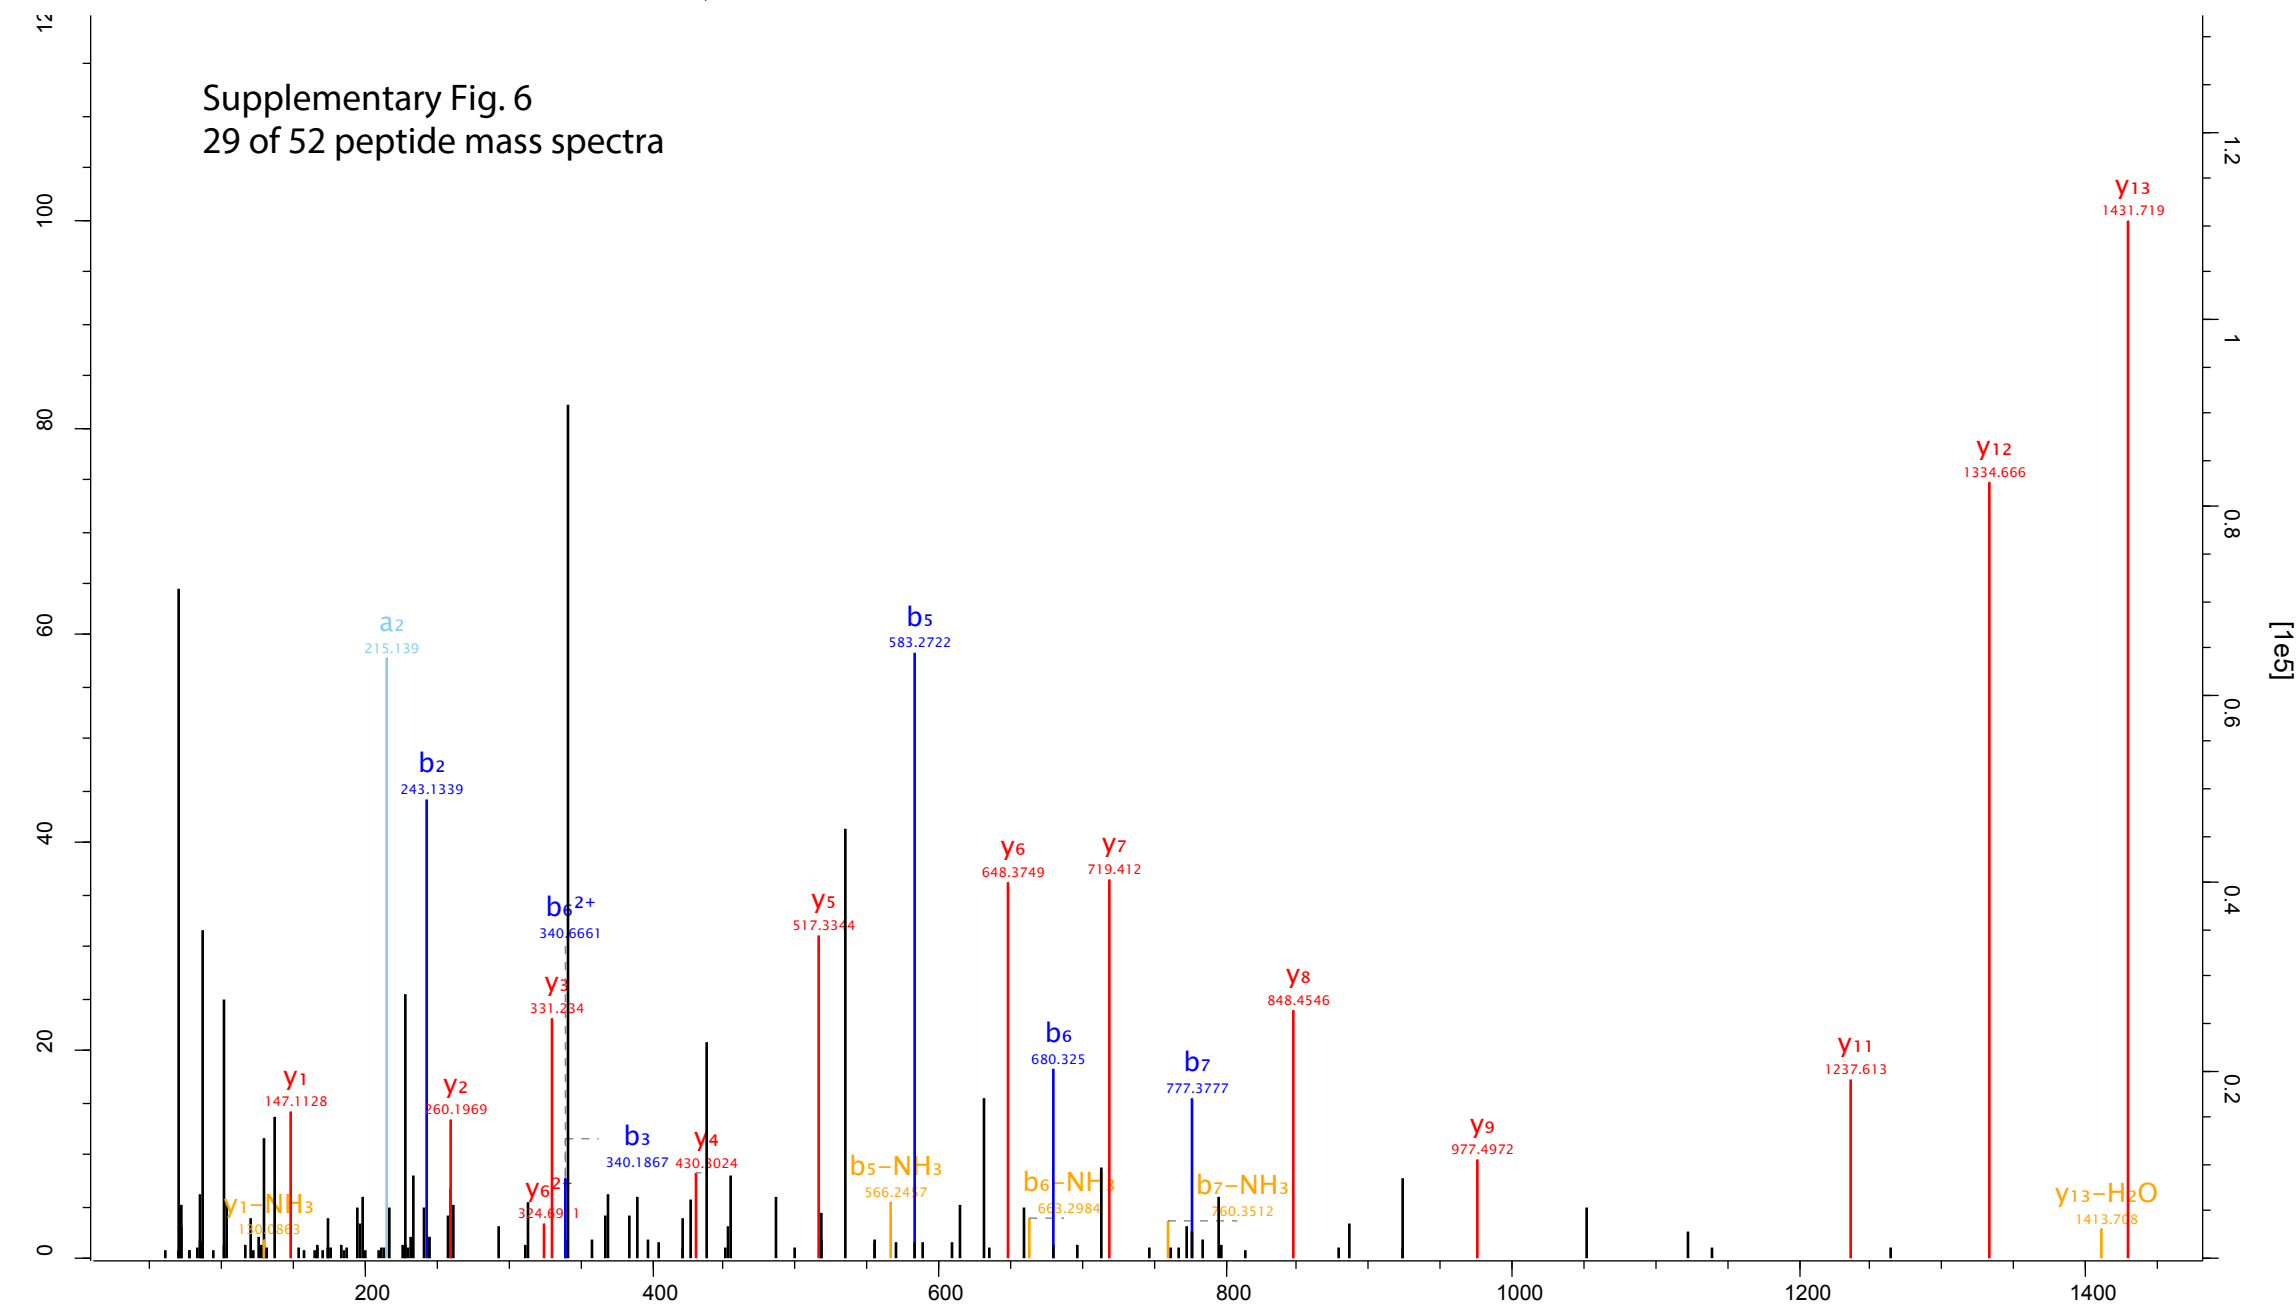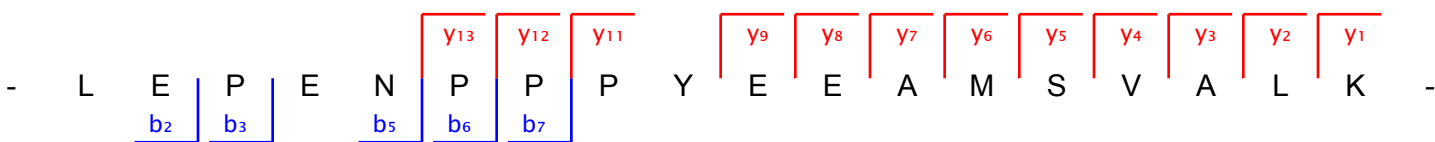

Supplementary Fig. 6  
30 of 52 peptide mass spectra

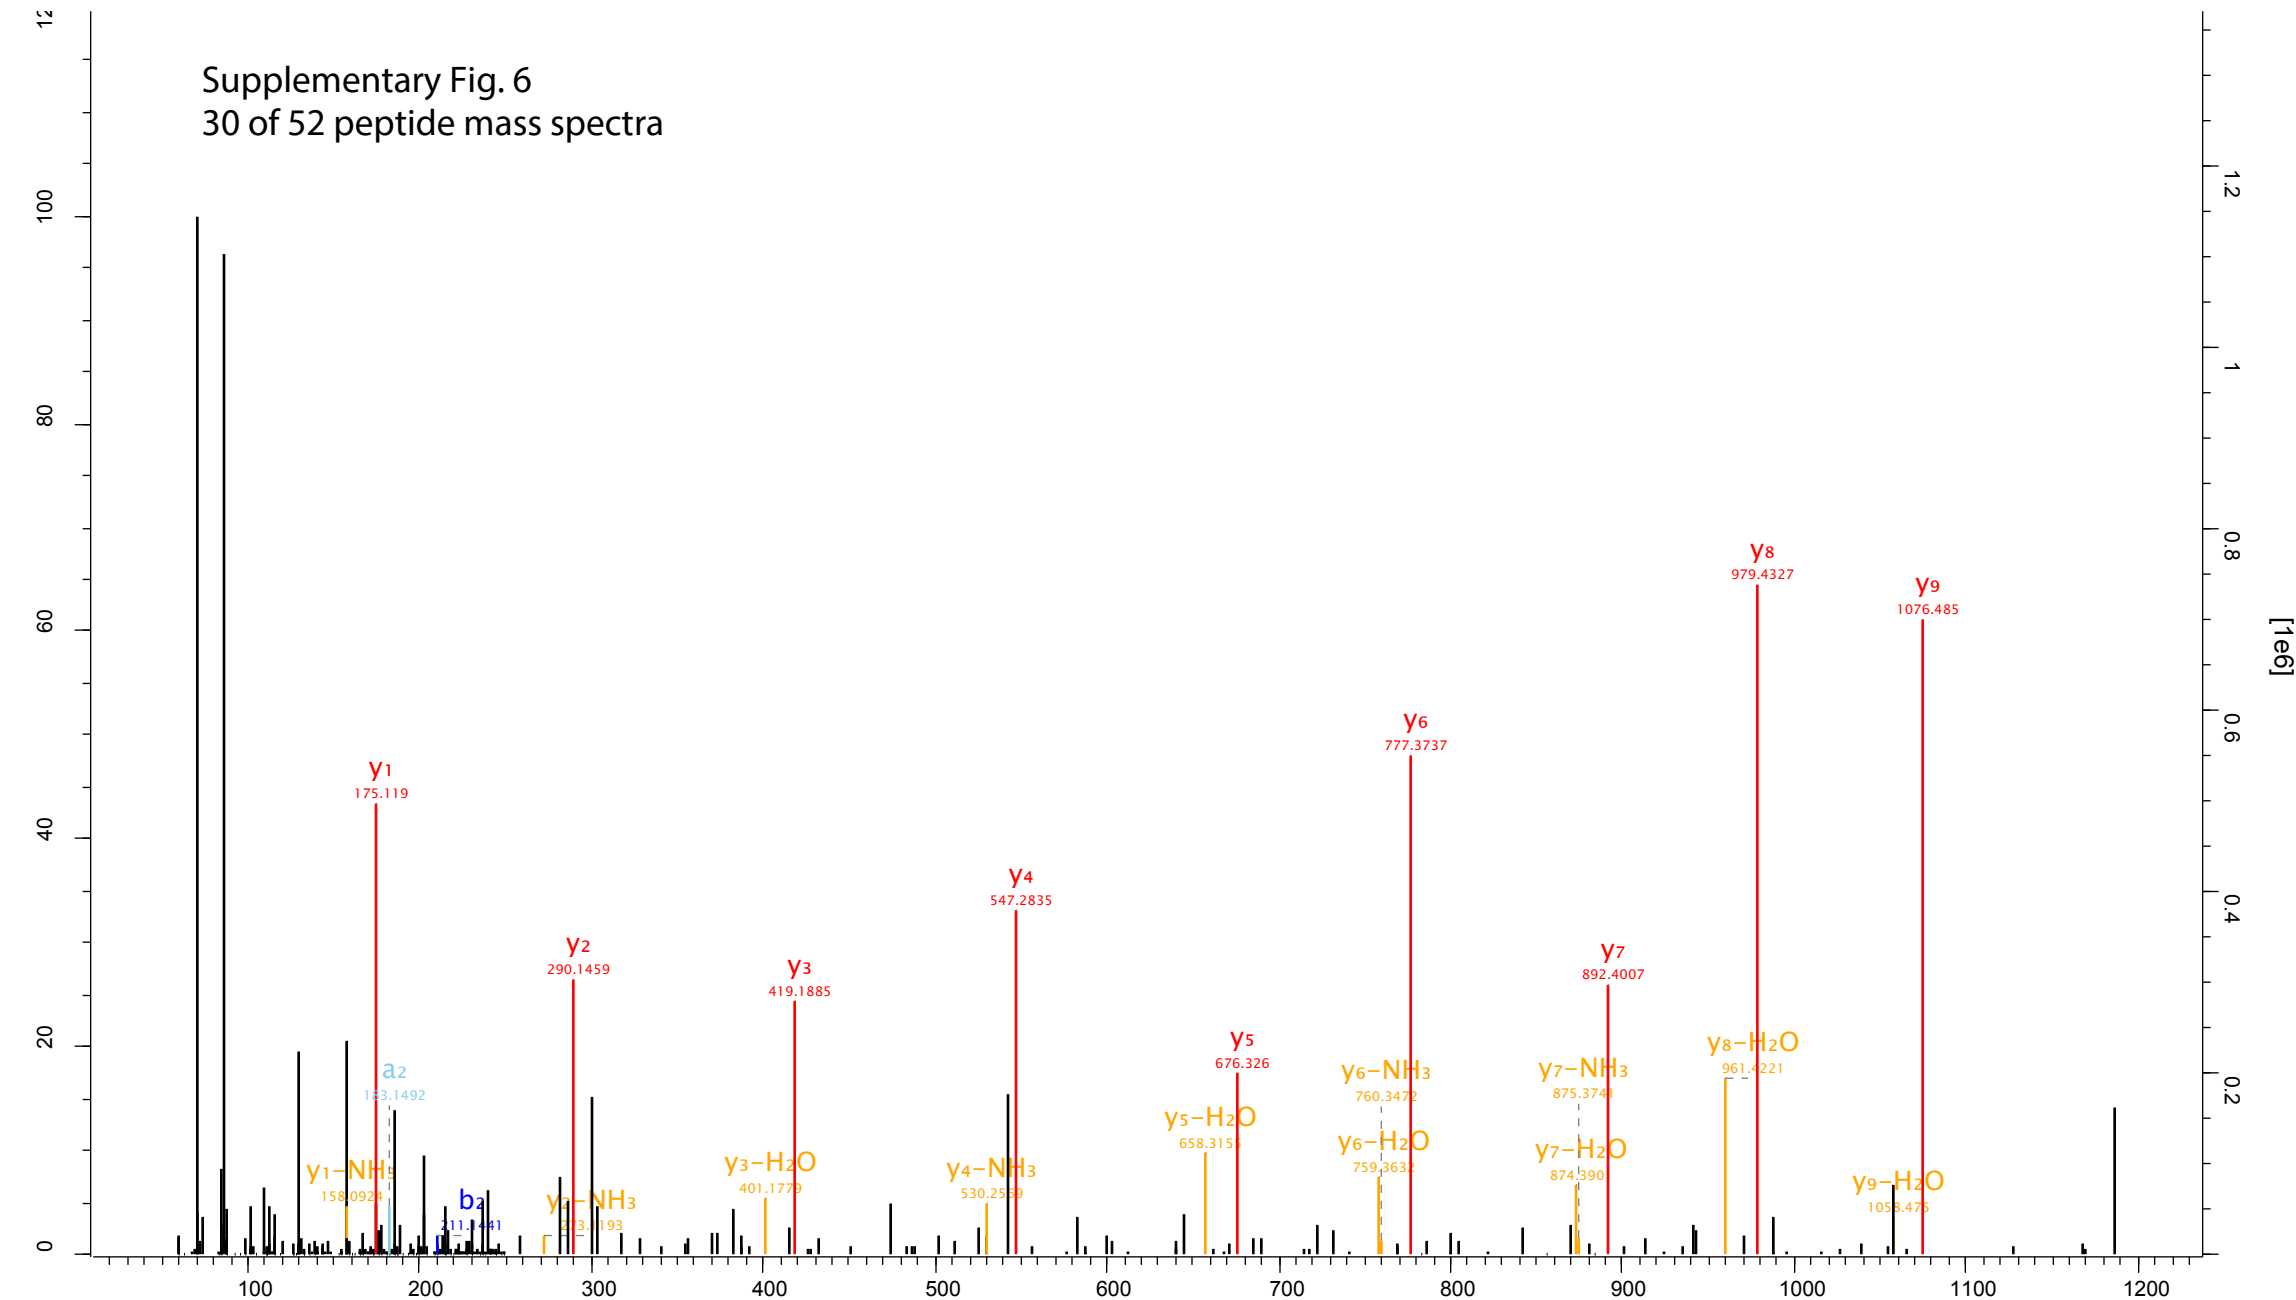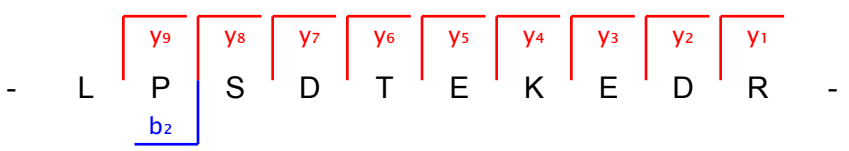

Supplementary Fig. 6  
31 of 52 peptide mass spectra

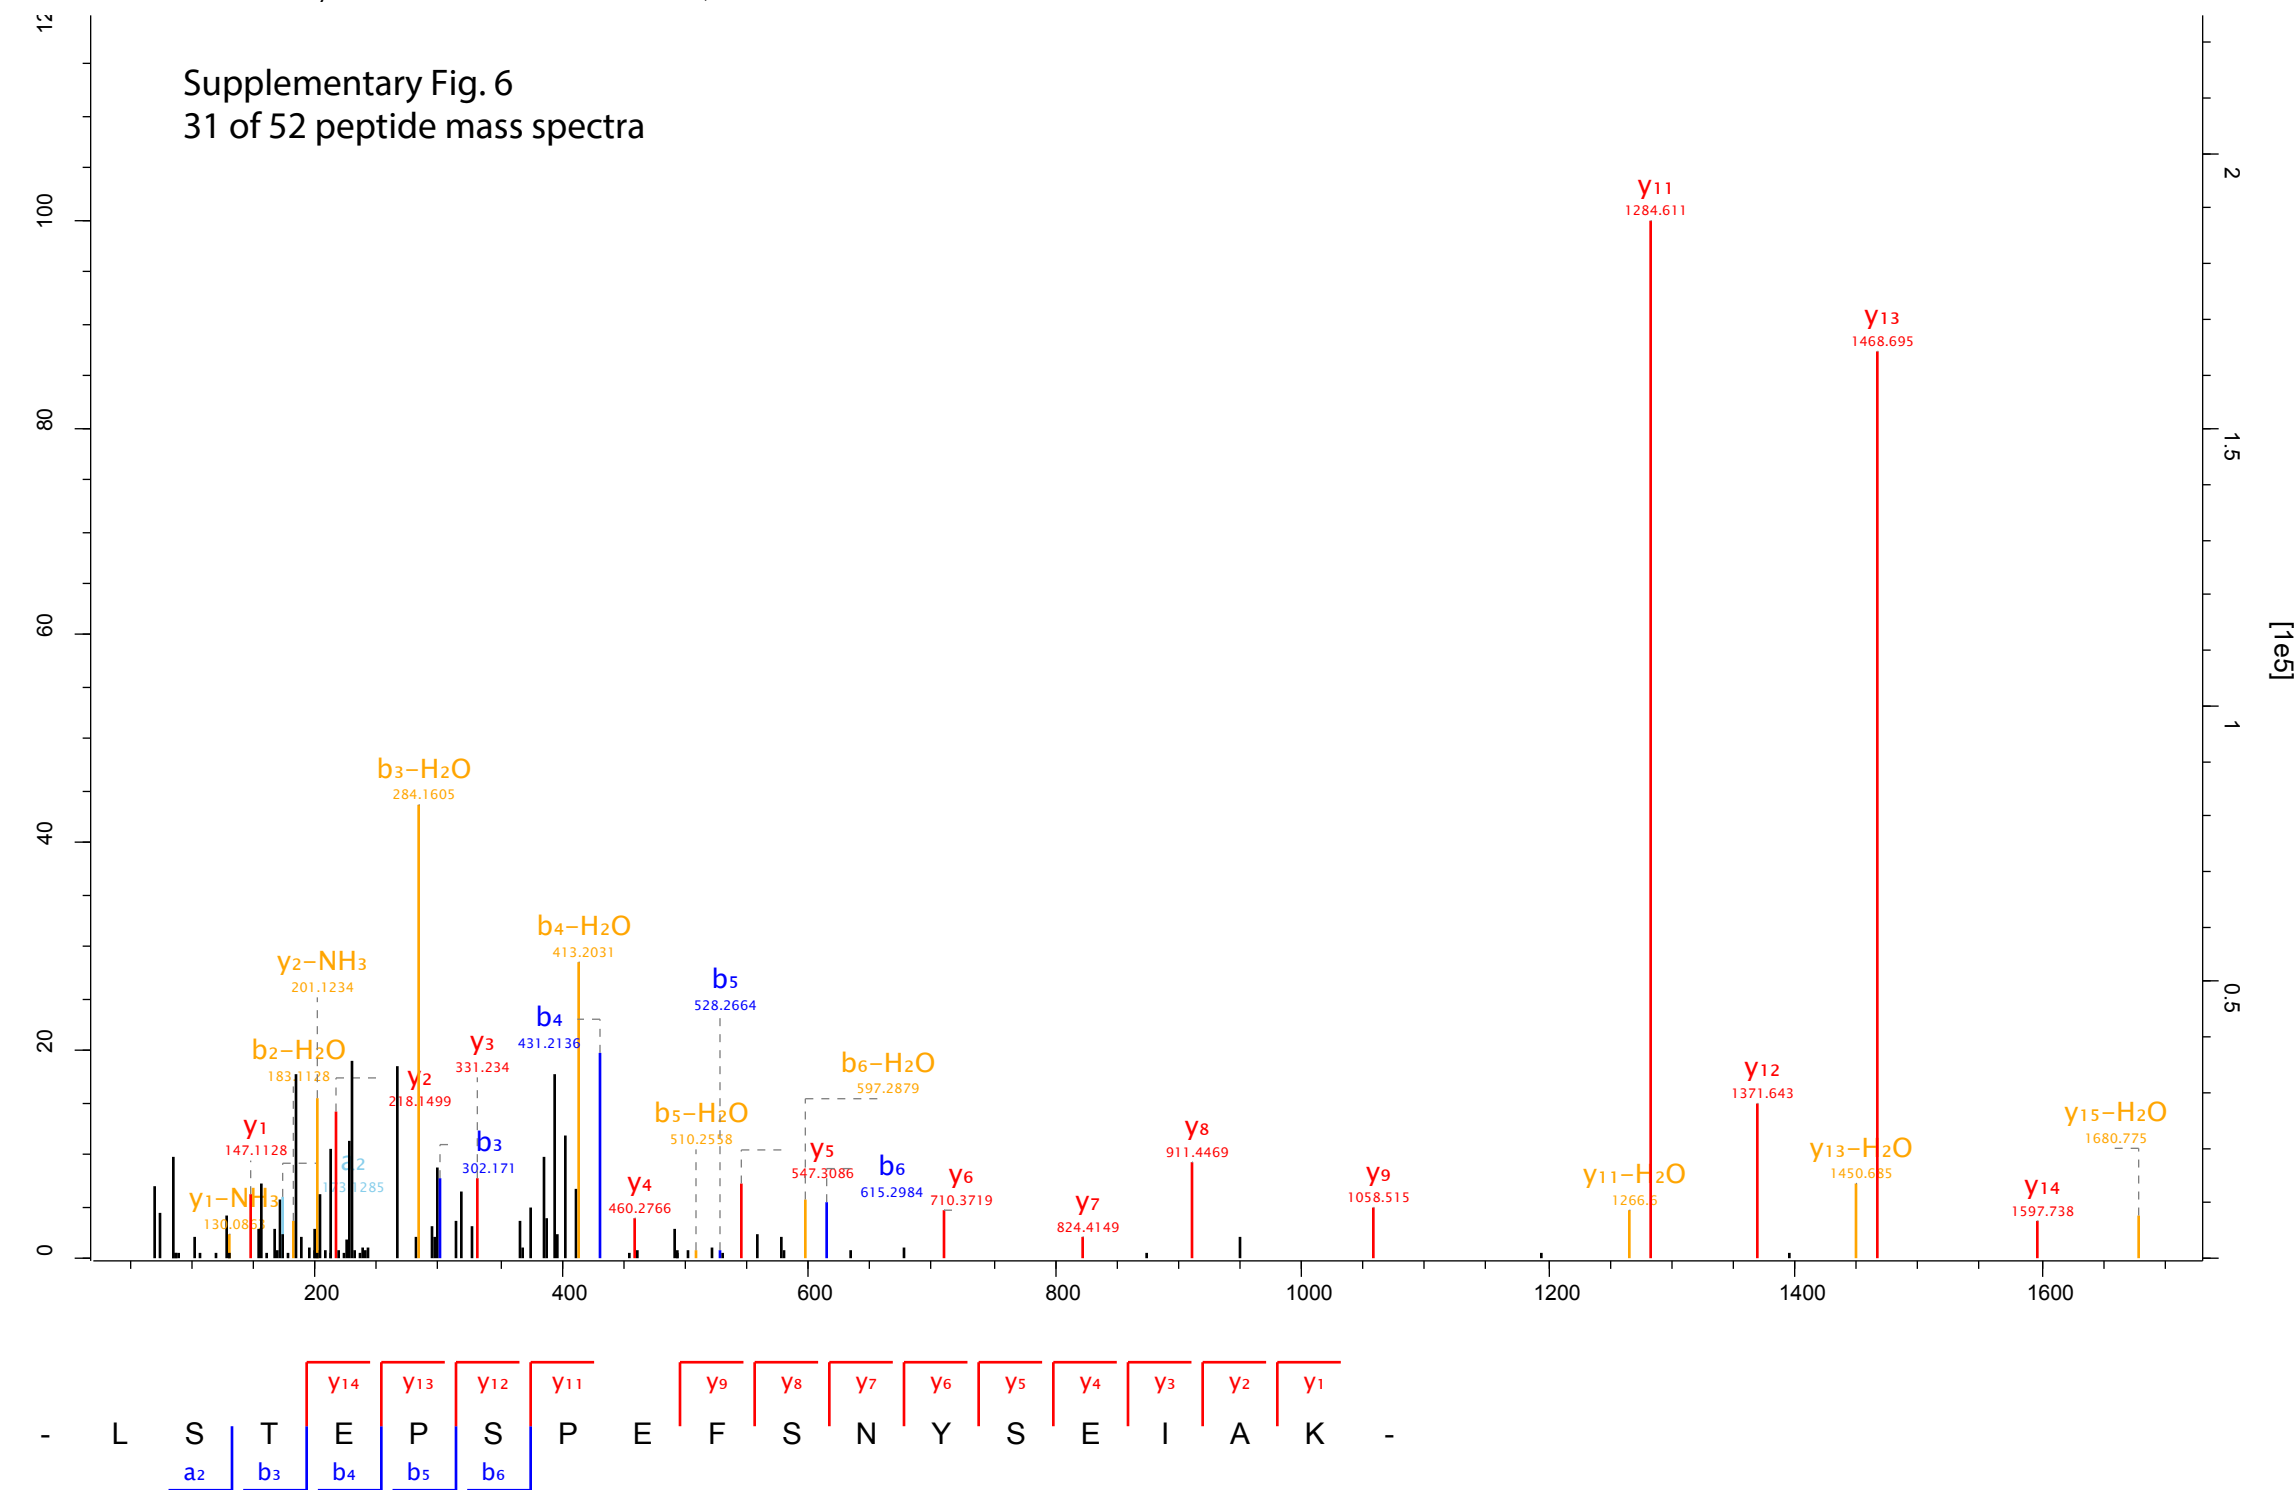

Supplementary Fig. 6  
32 of 52 peptide mass spectra

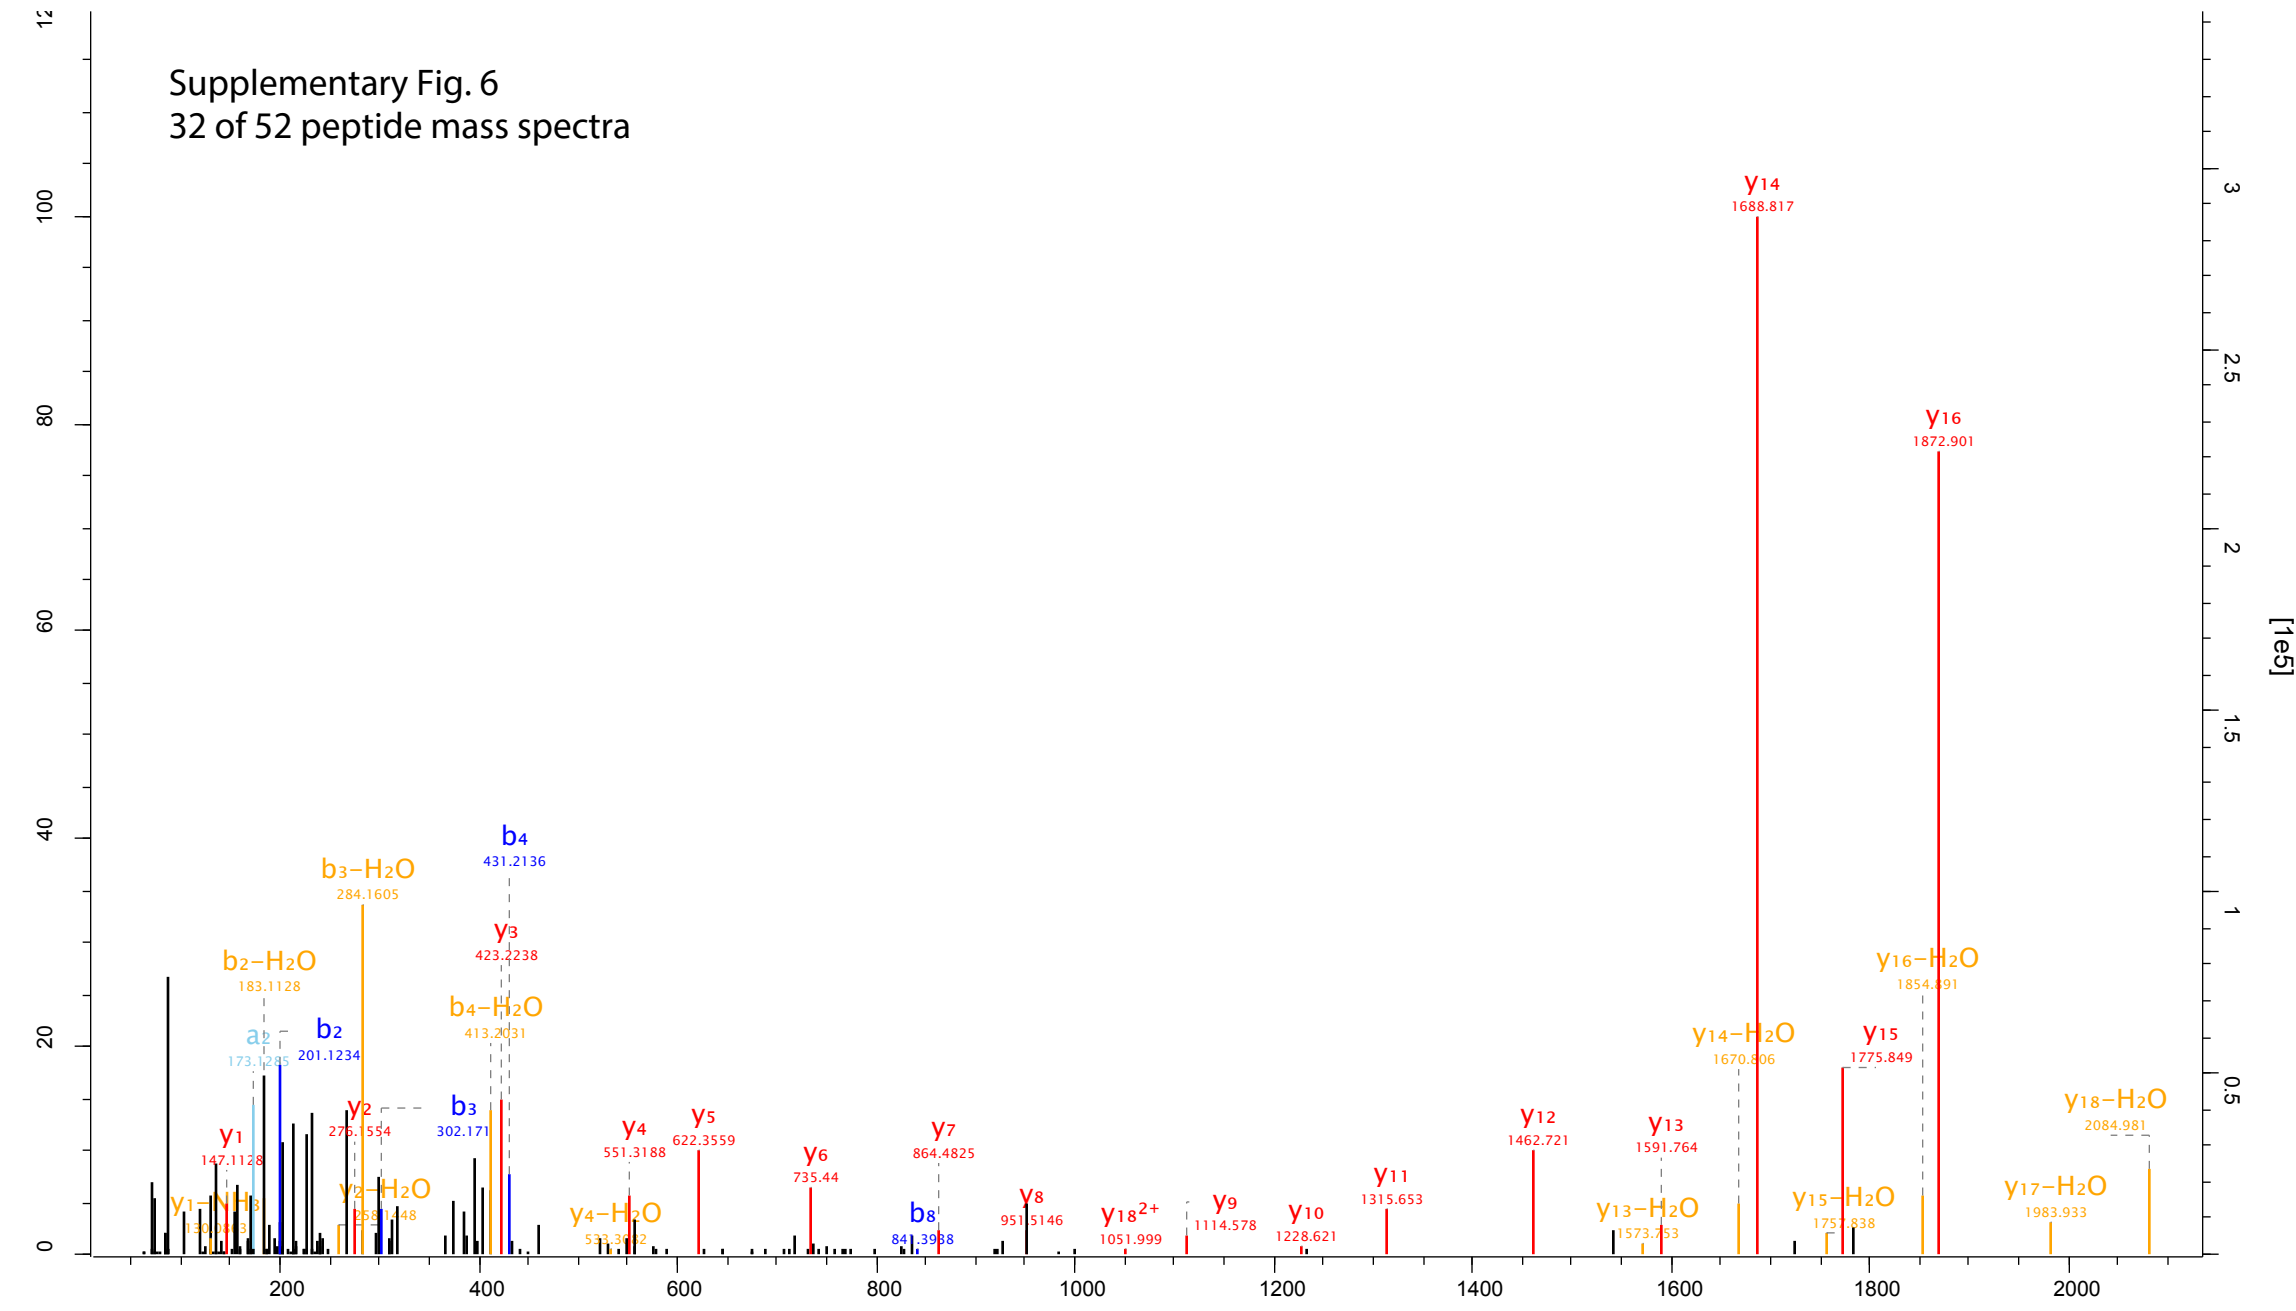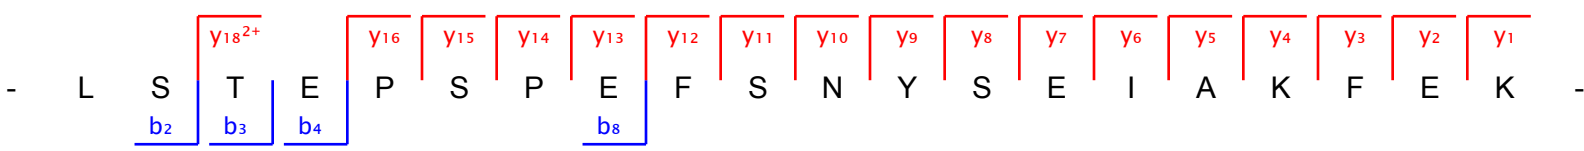

Supplementary Fig. 6  
33 of 52 peptide mass spectra

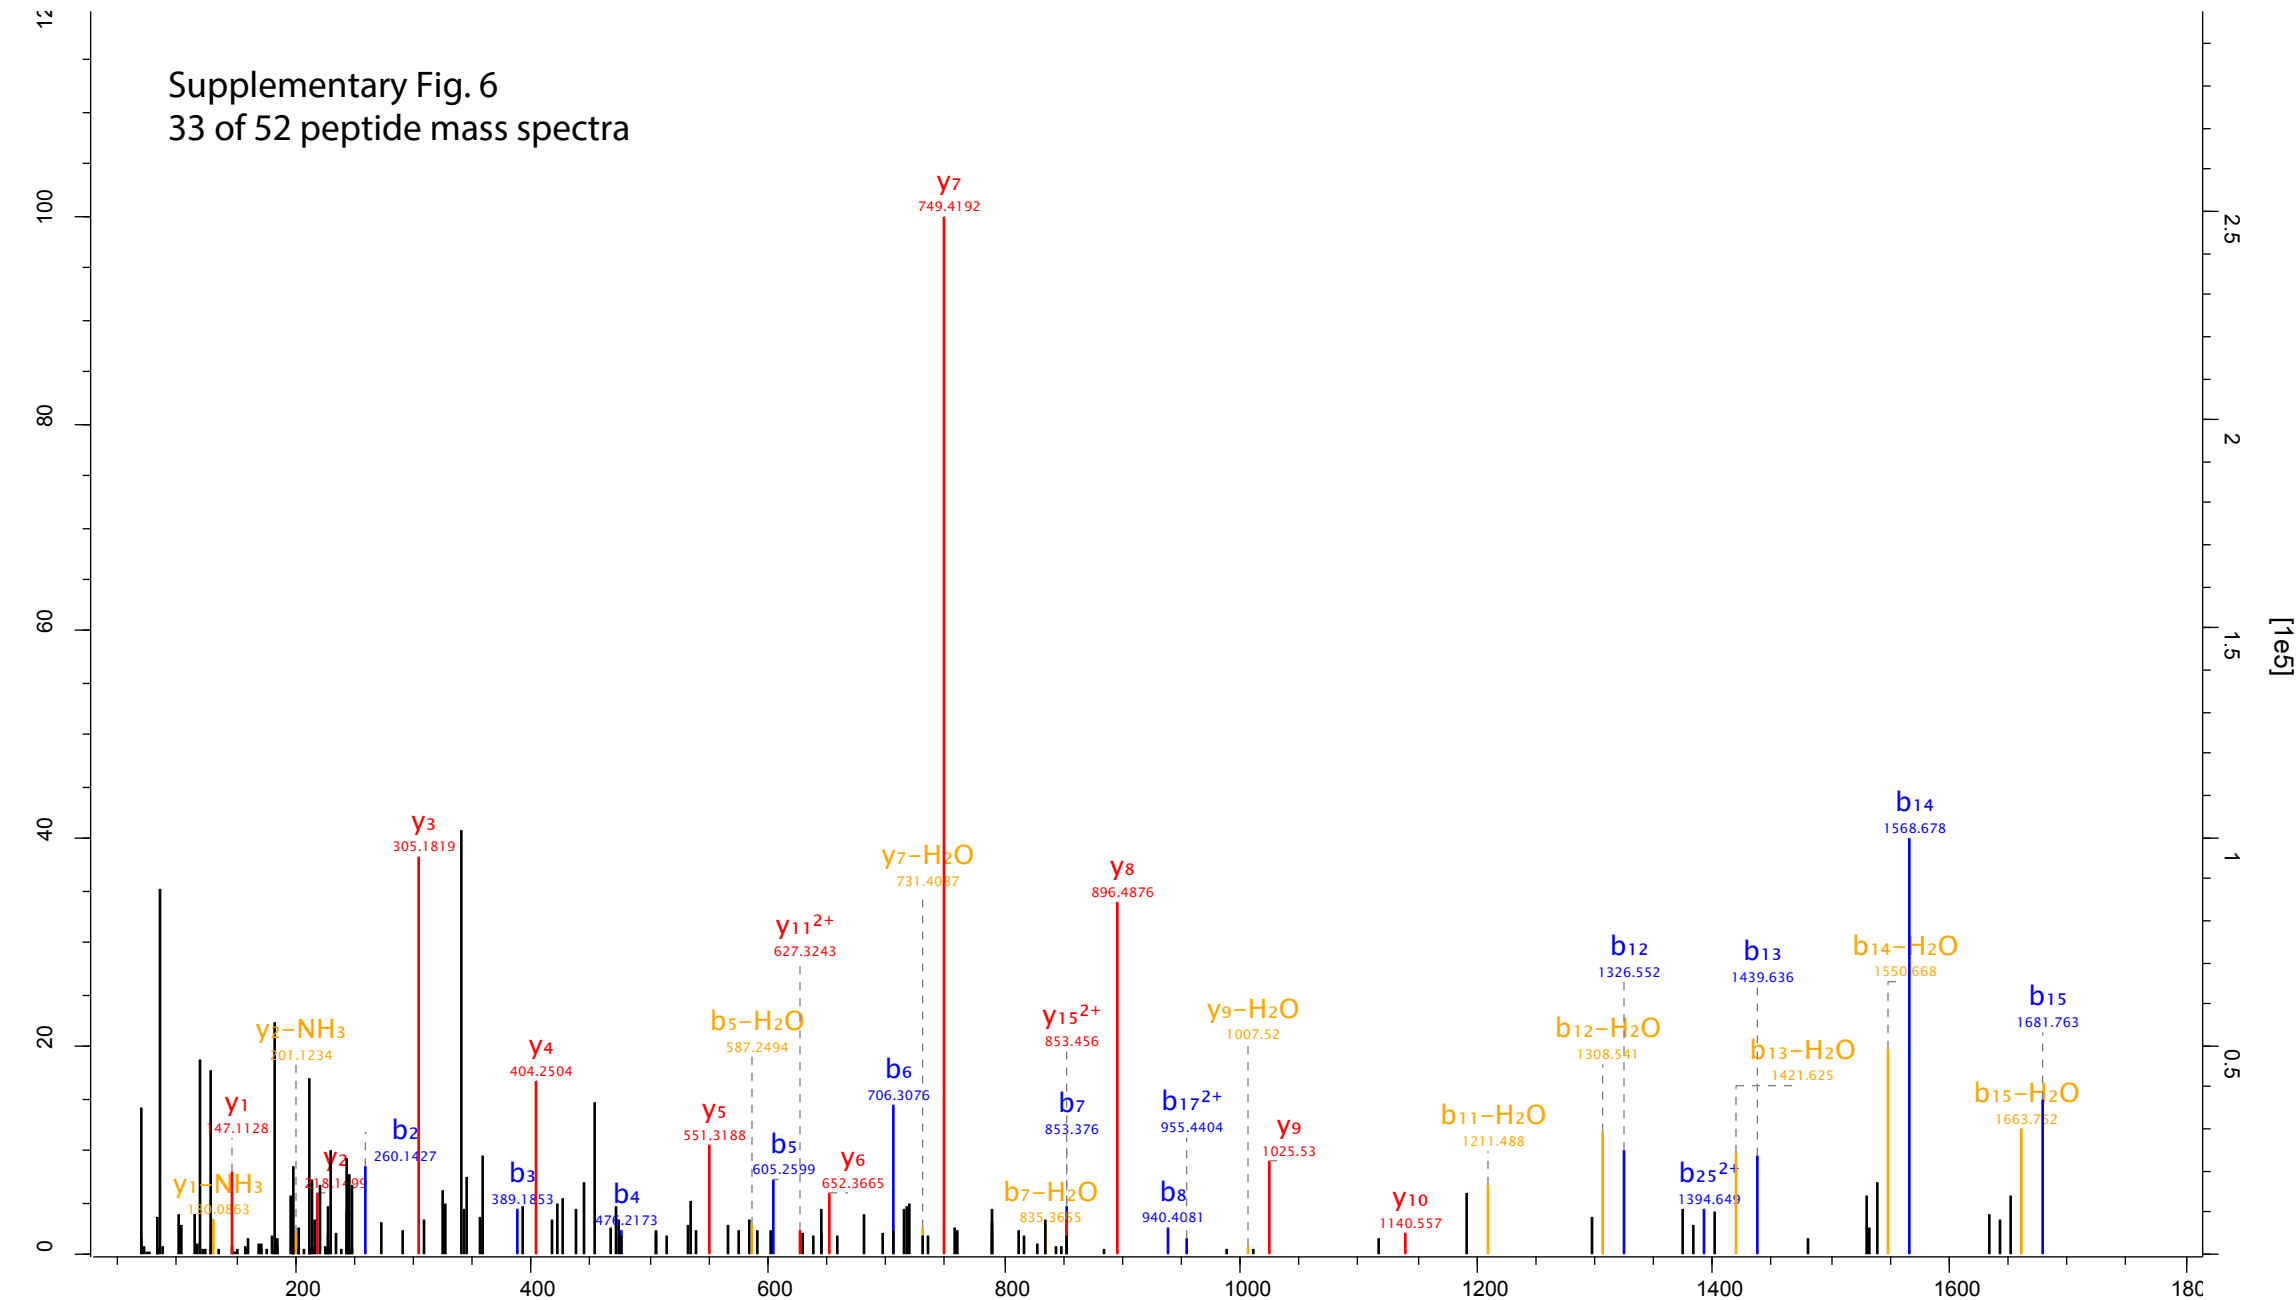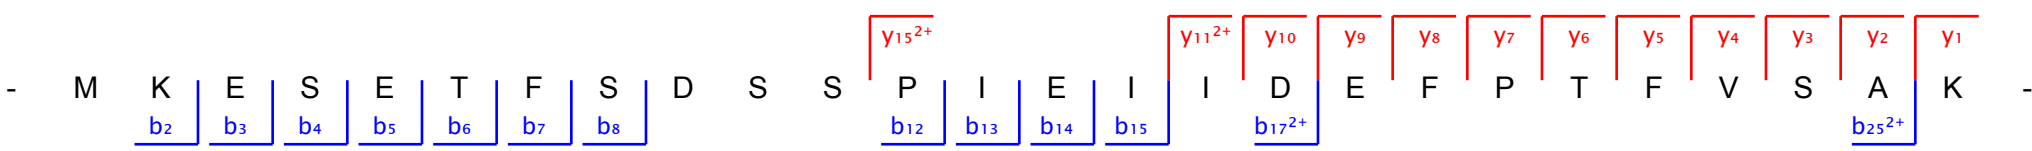

Supplementary Fig. 6  
34 of 52 peptide mass spectra

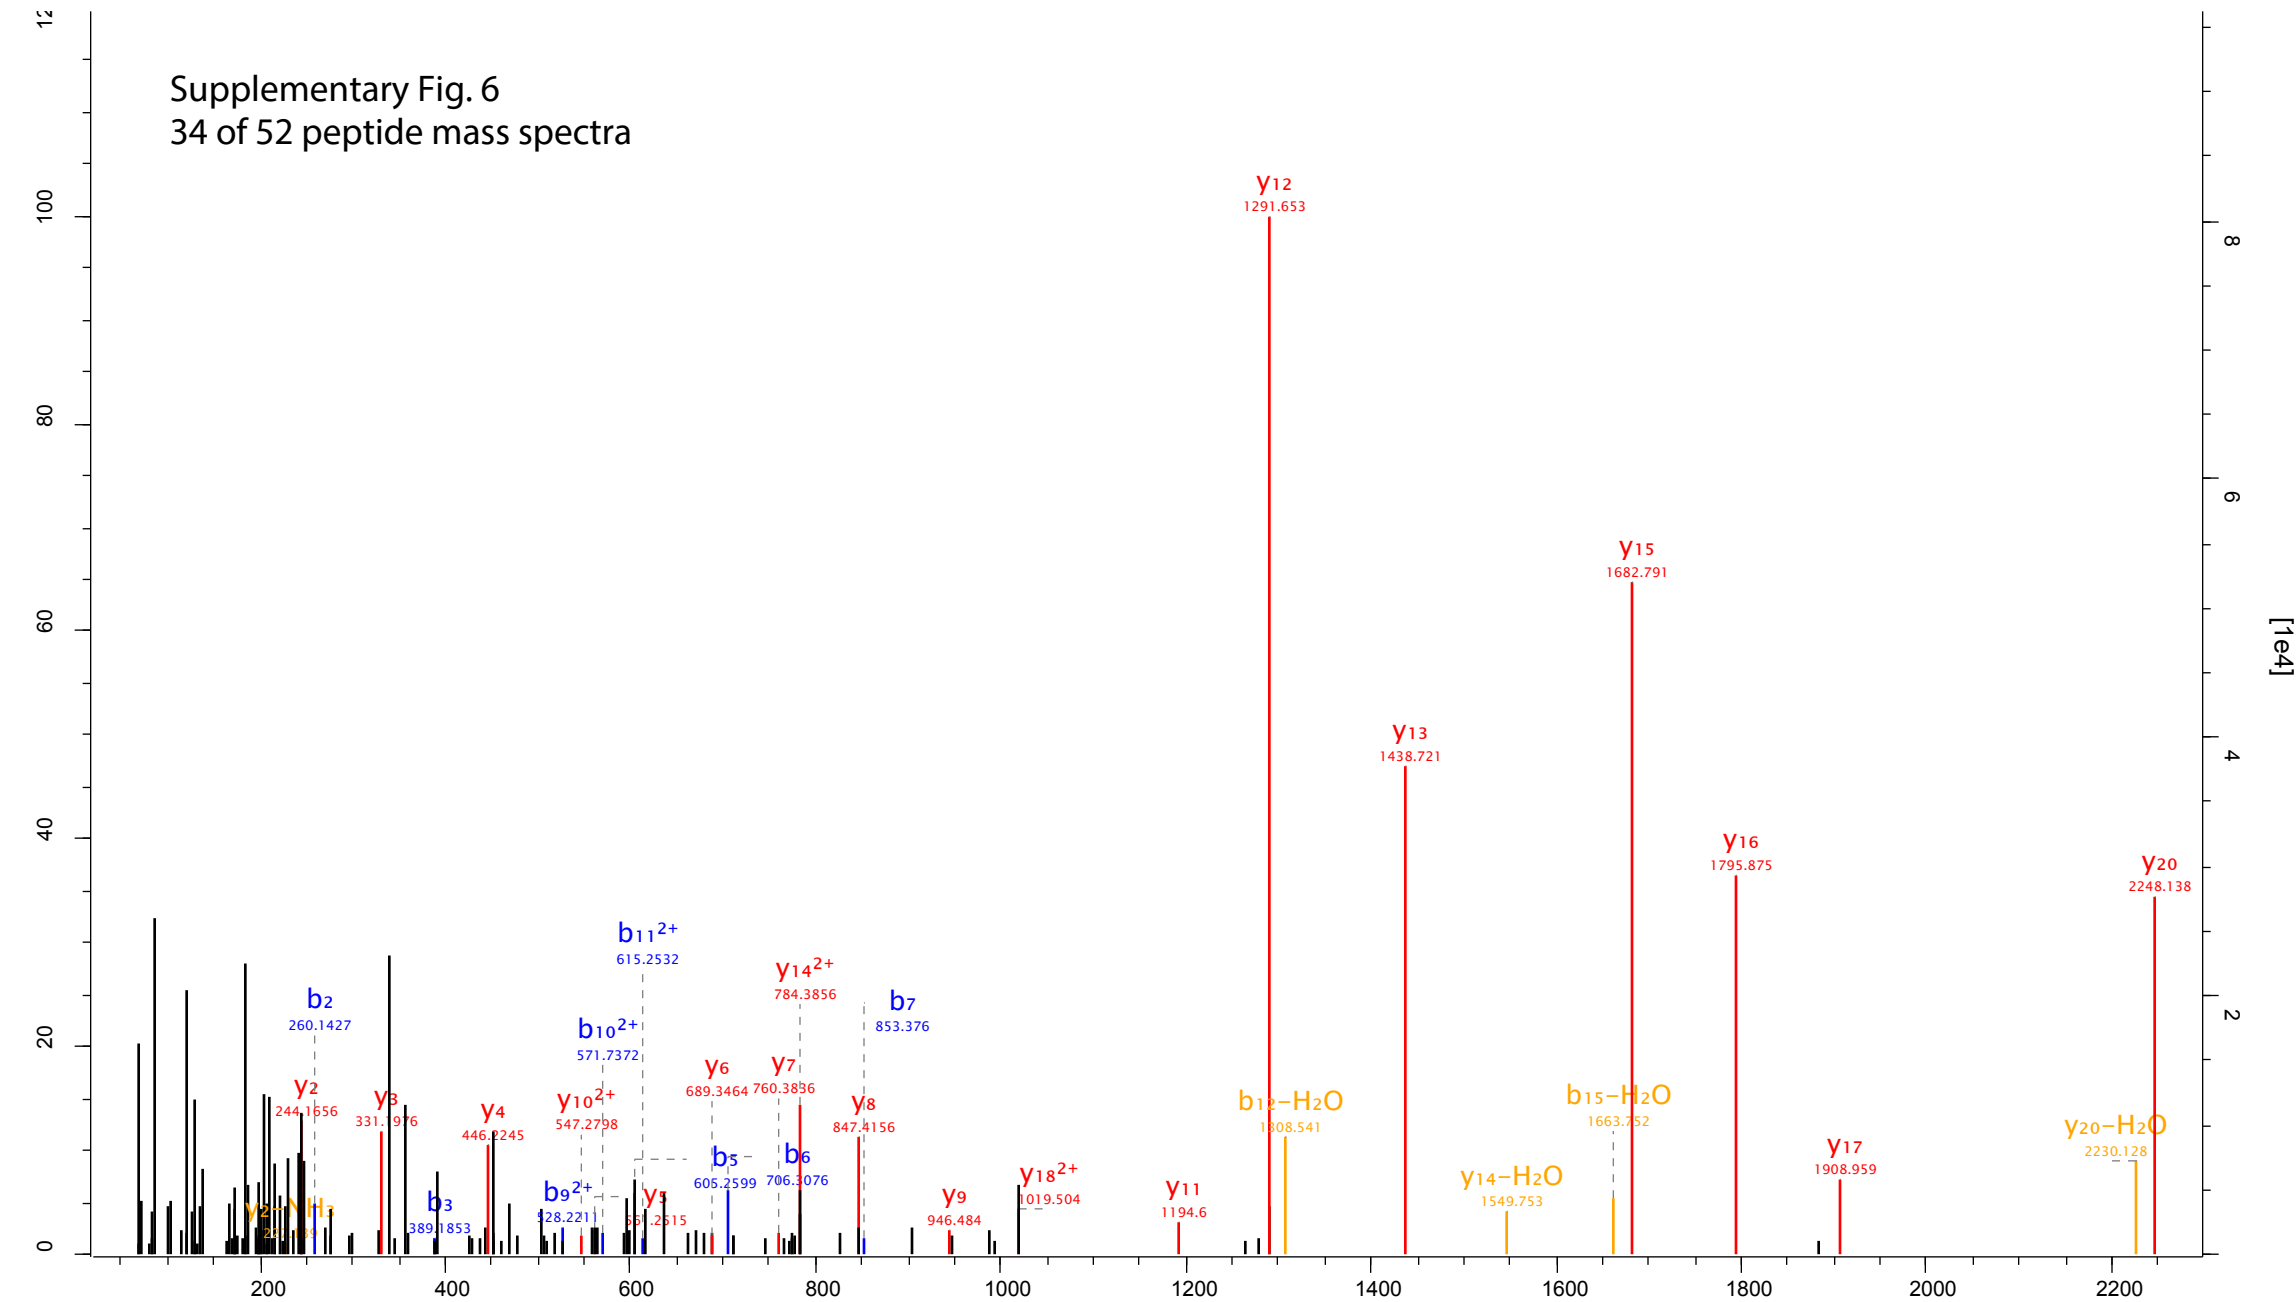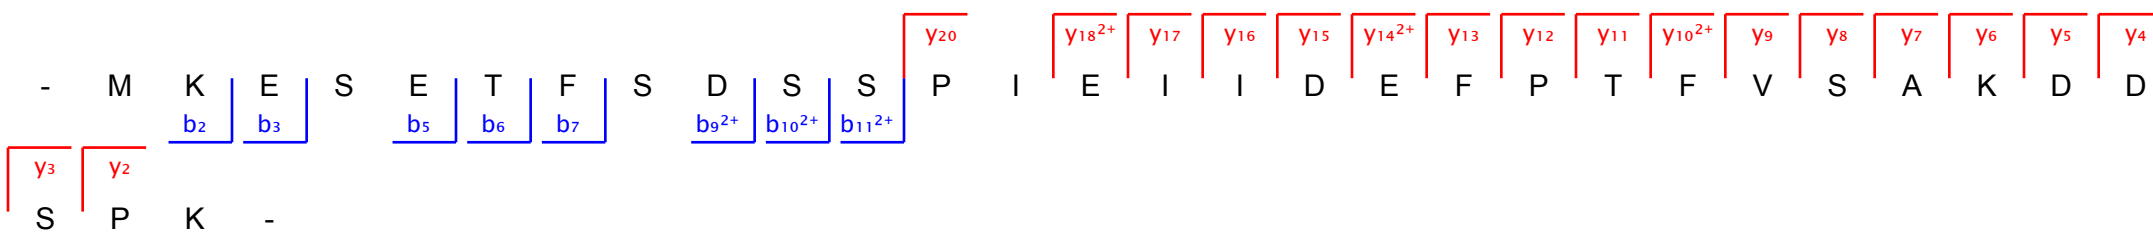

### Supplementary Fig. 6 35 of 52 peptide mass spectra

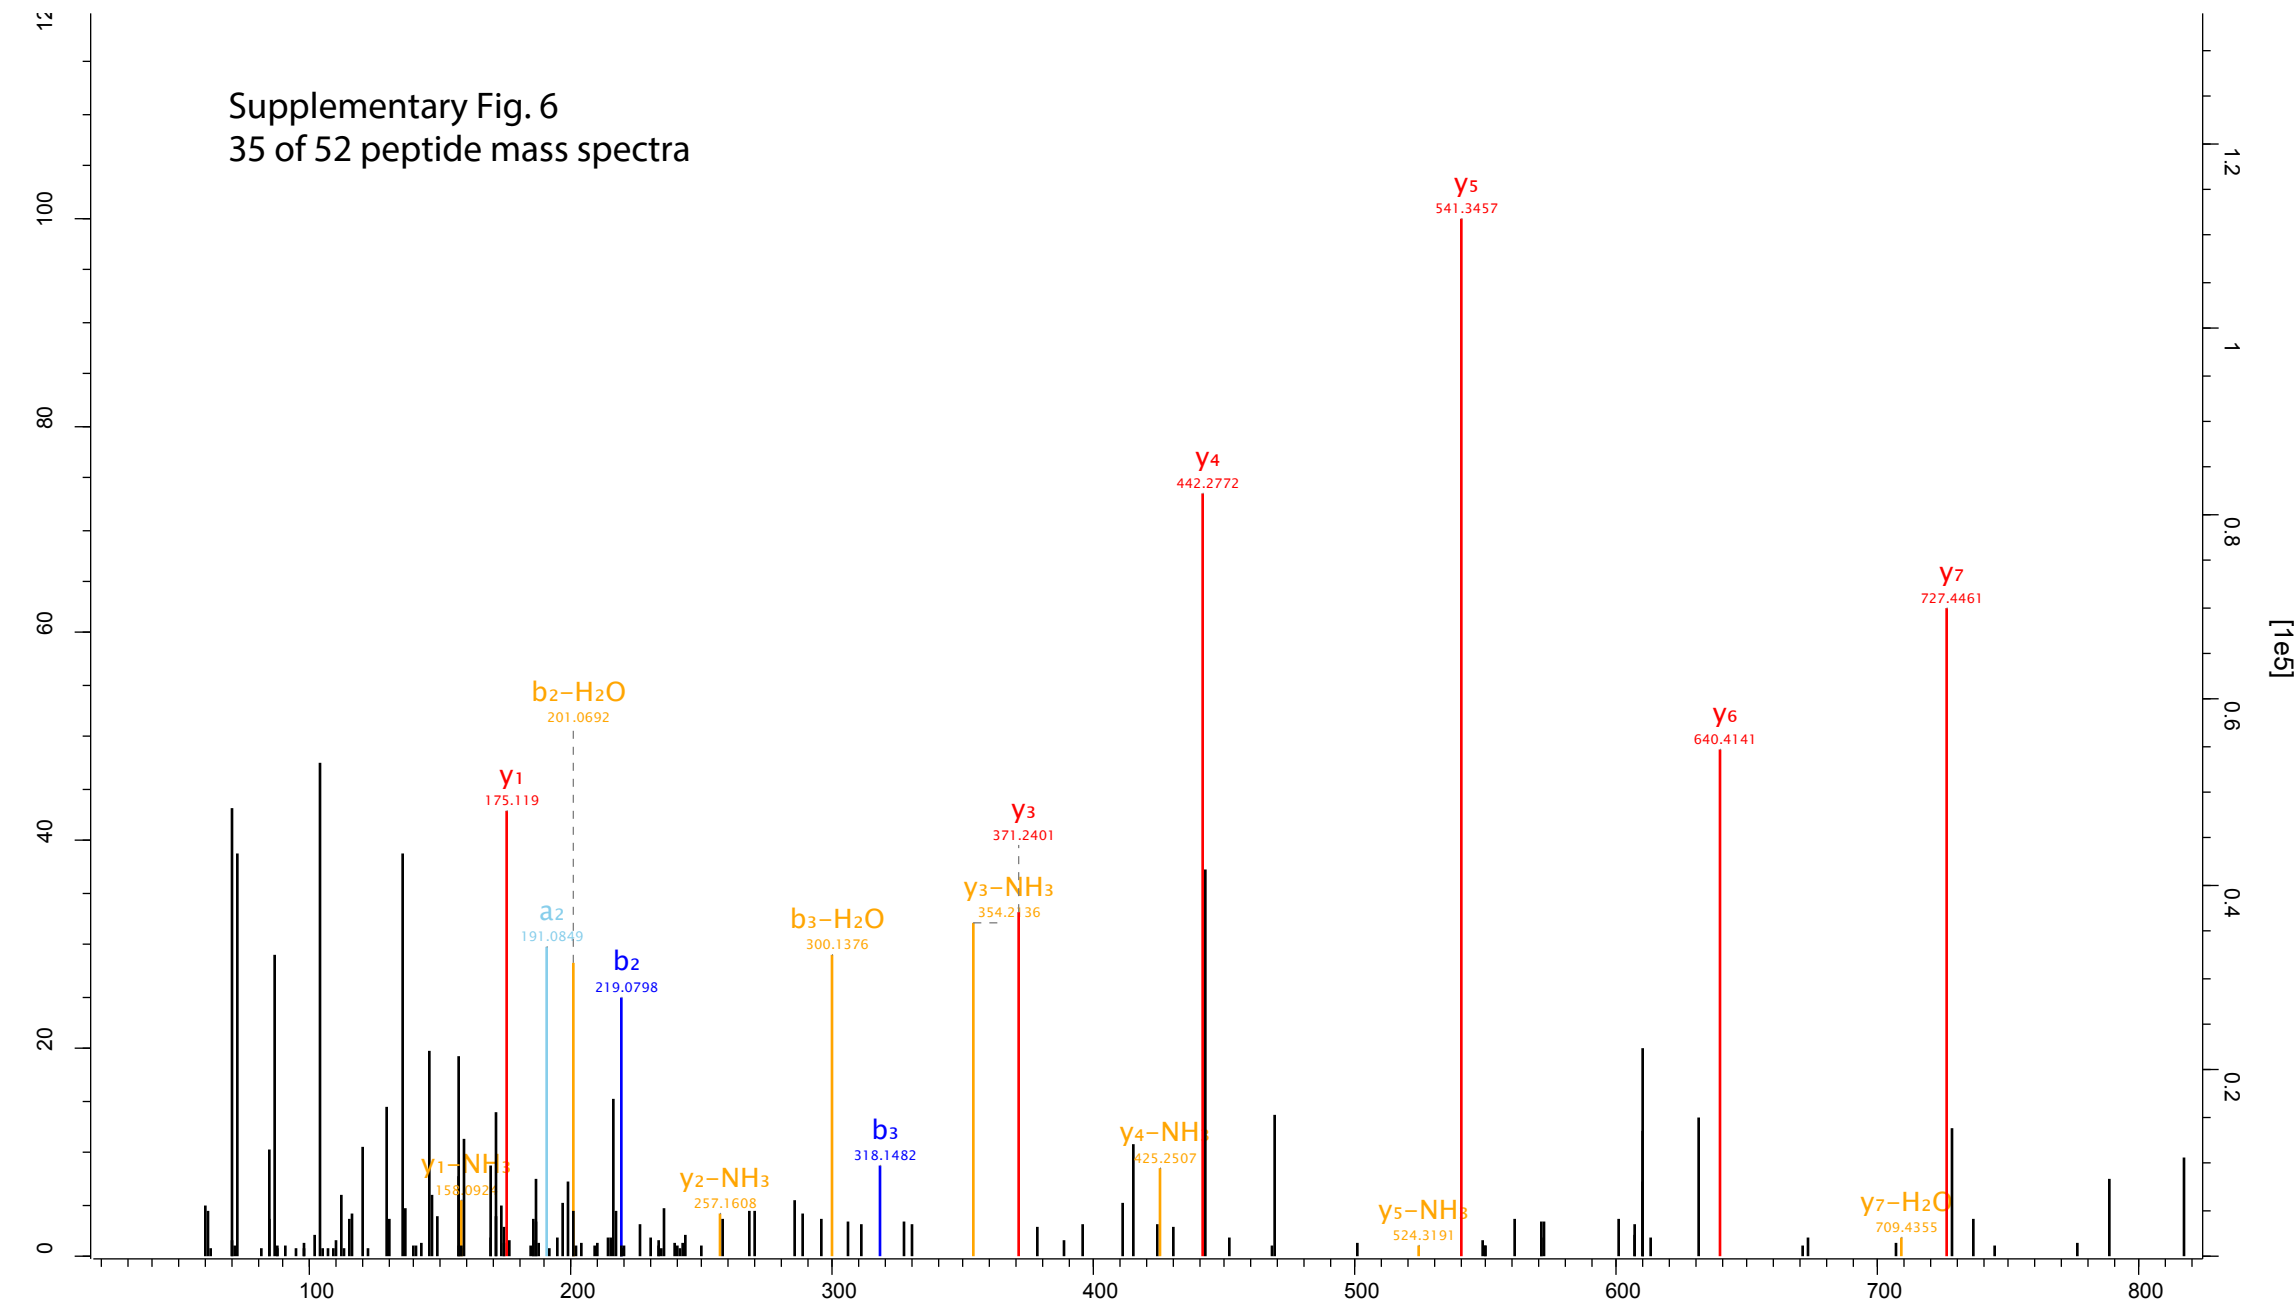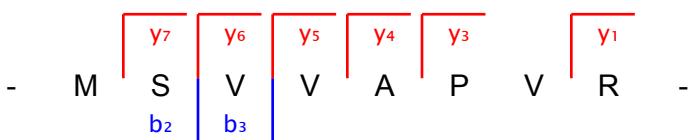

Supplementary Fig. 6  
36 of 52 peptide mass spectra

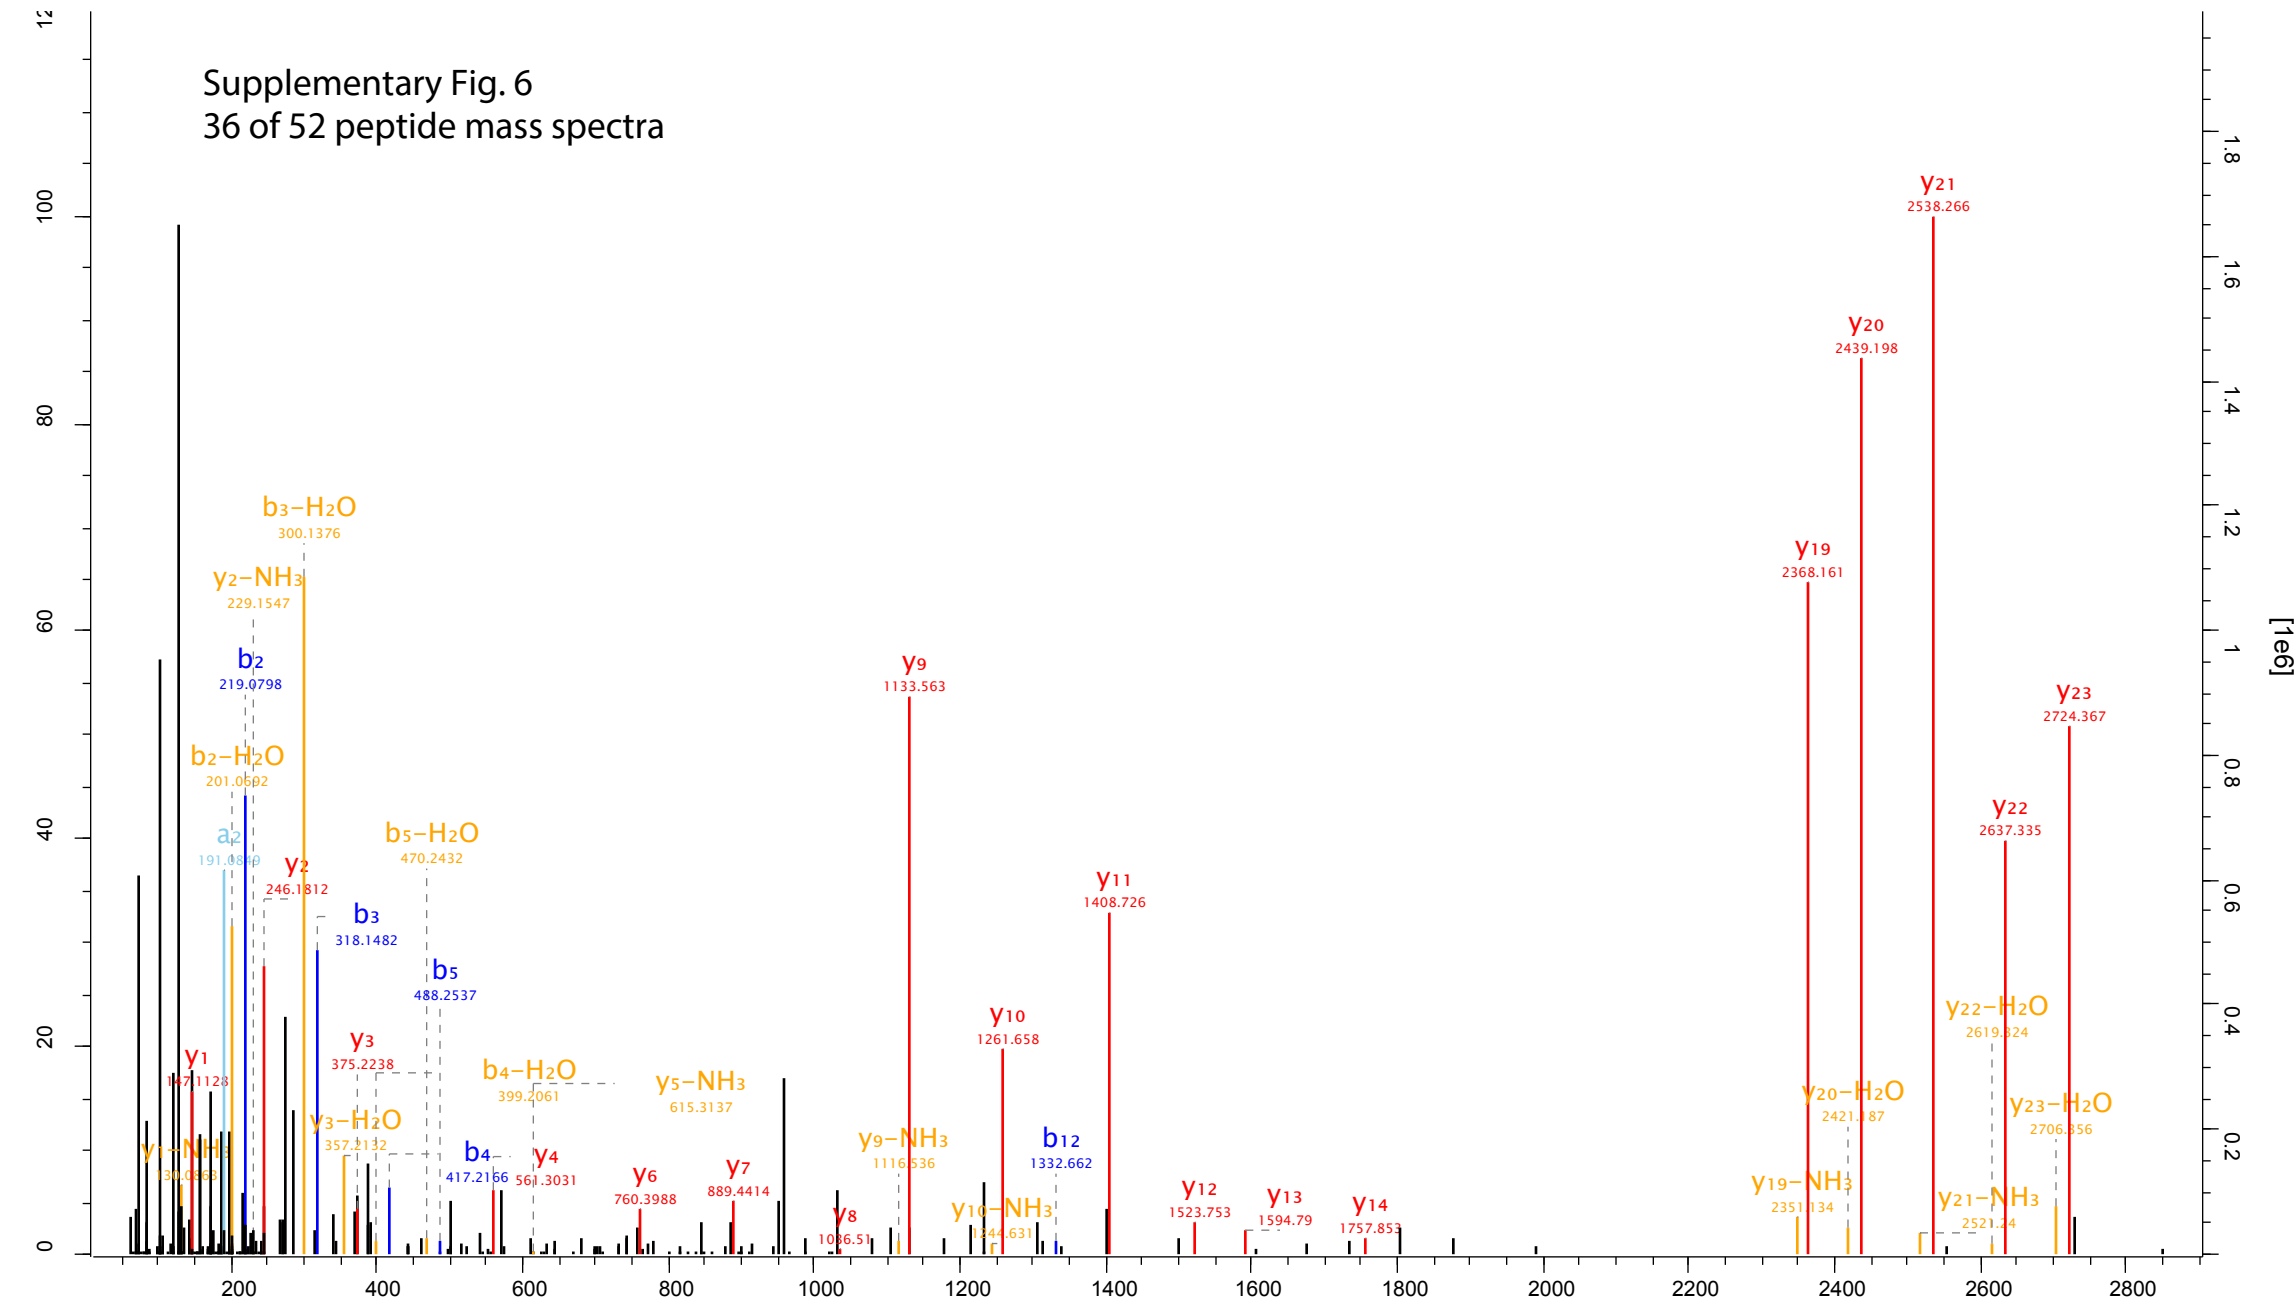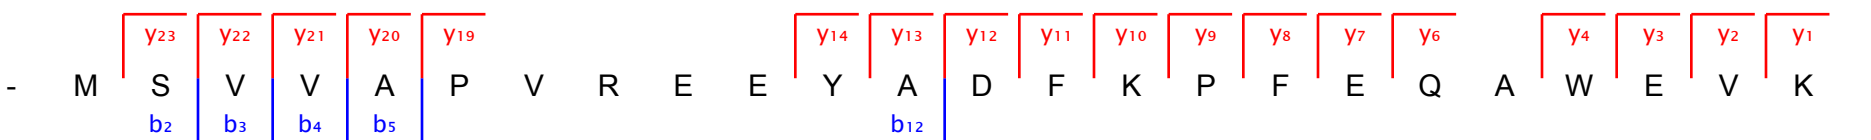



Supplementary Fig. 6  
37 of 52 peptide mass spectra

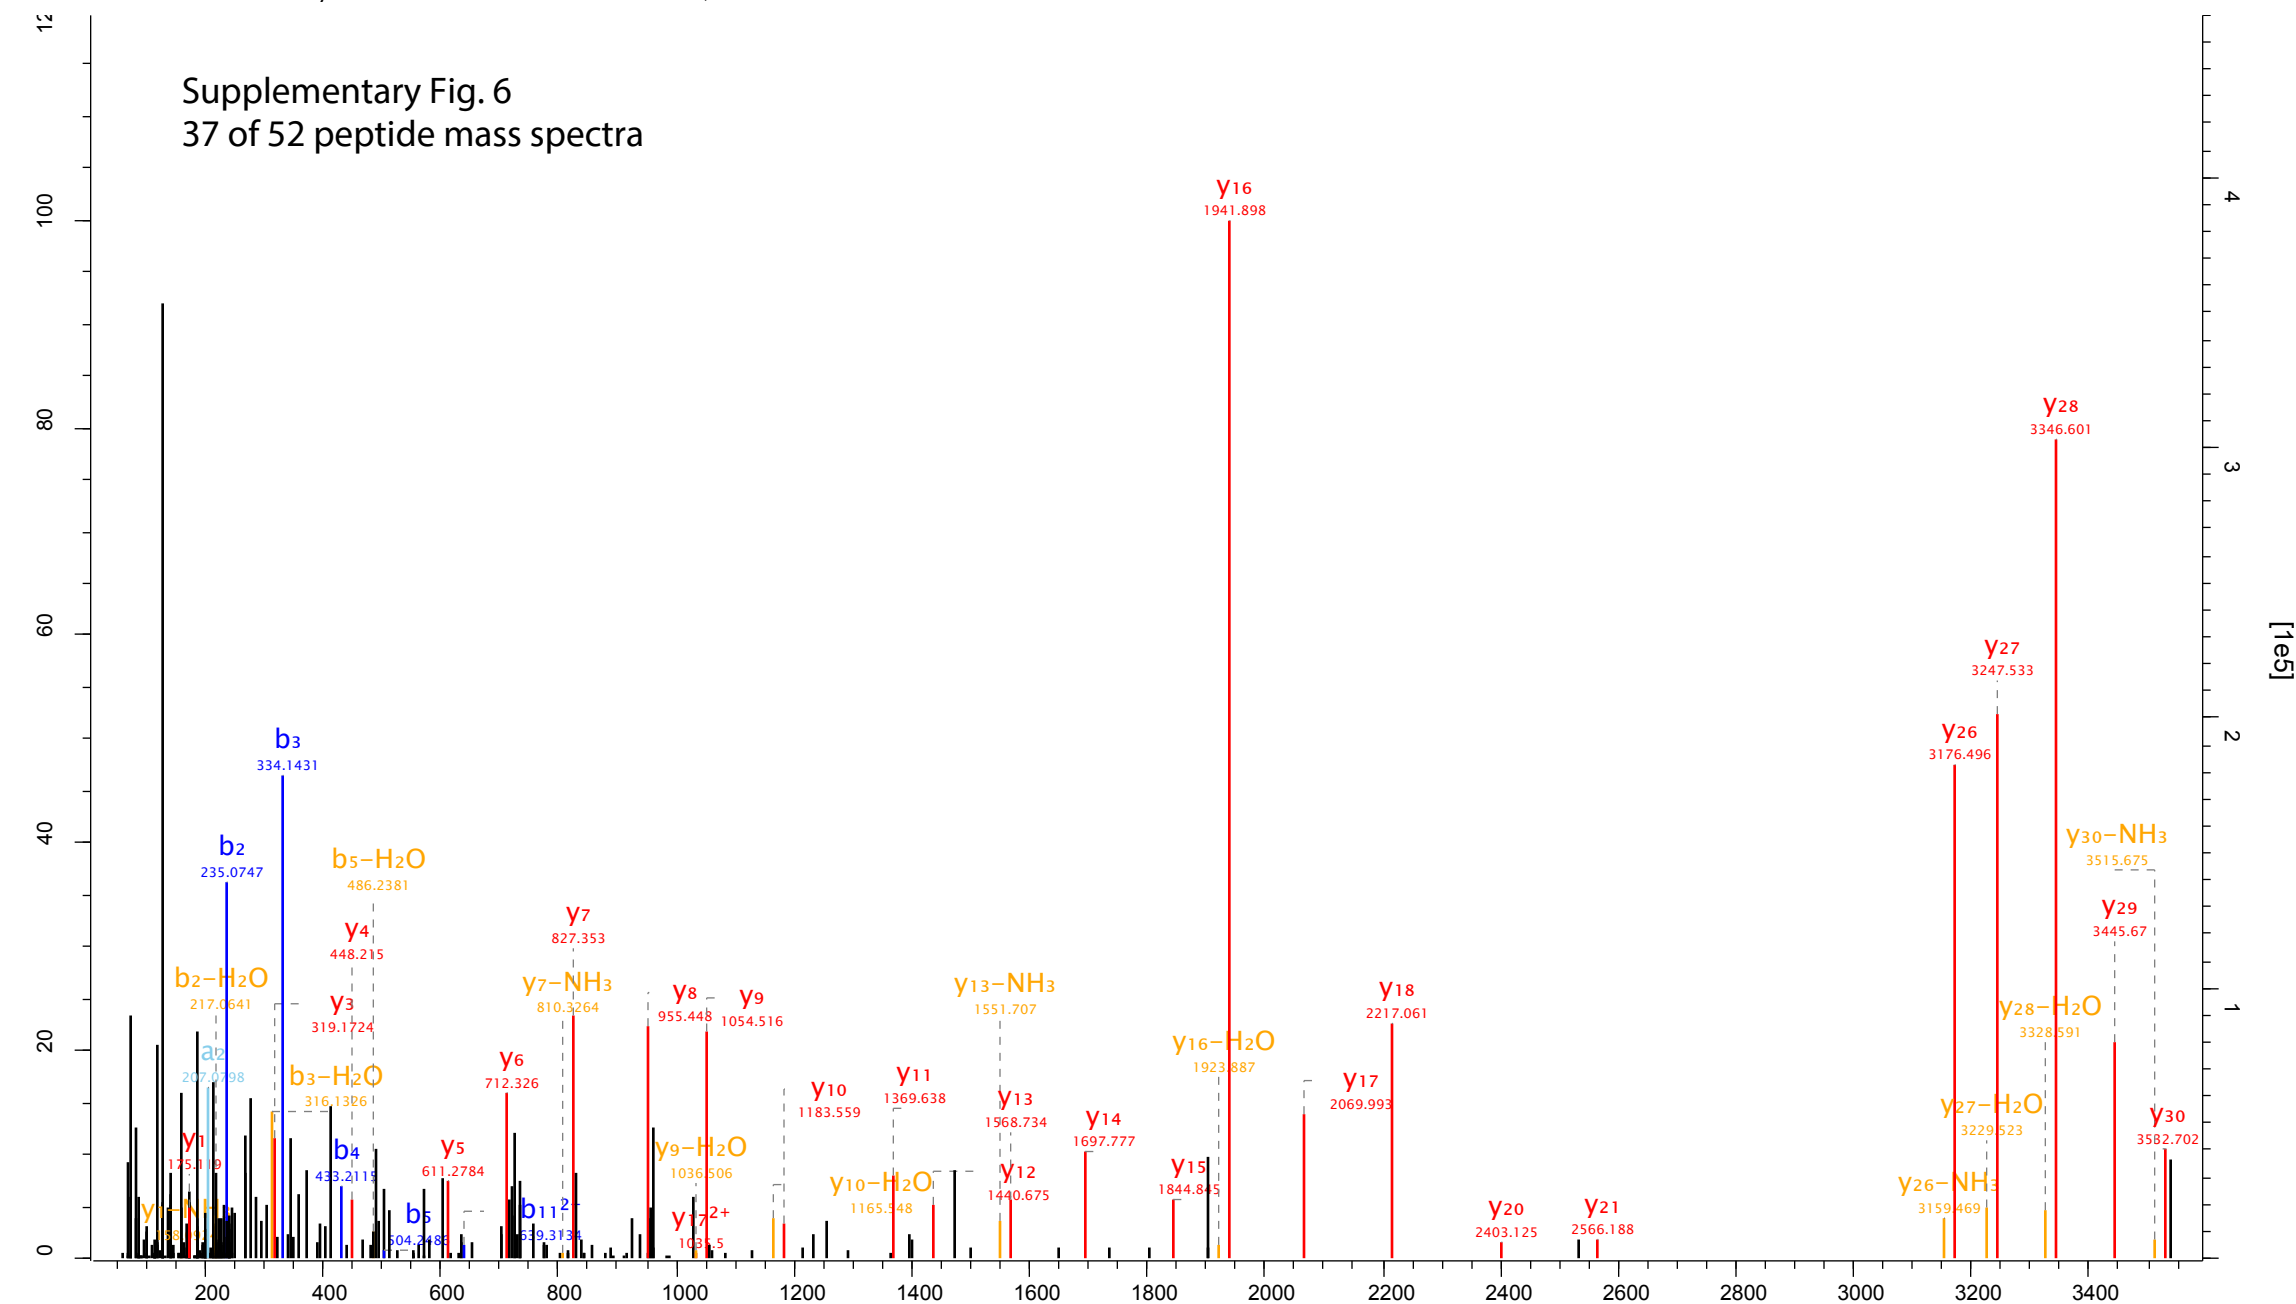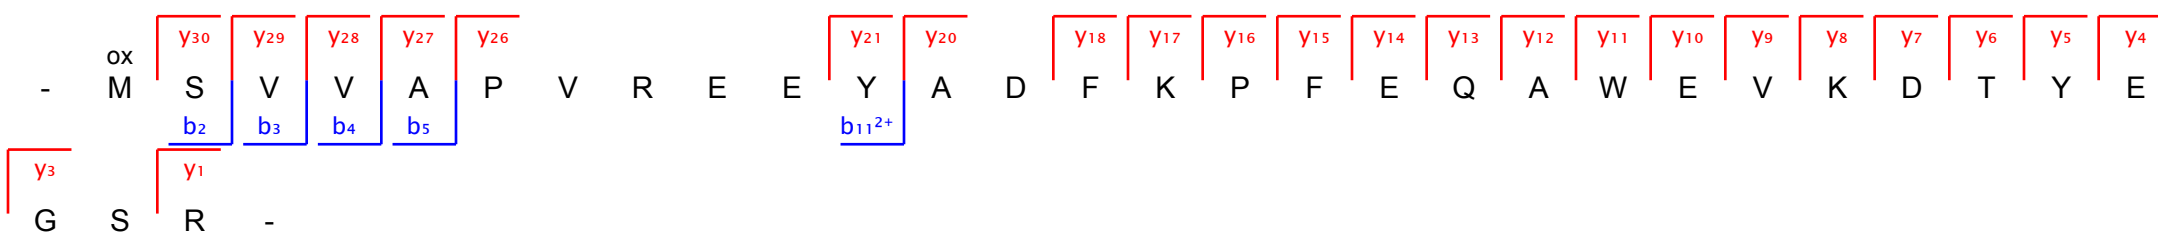

Supplementary Fig. 6  
38 of 52 peptide mass spectra

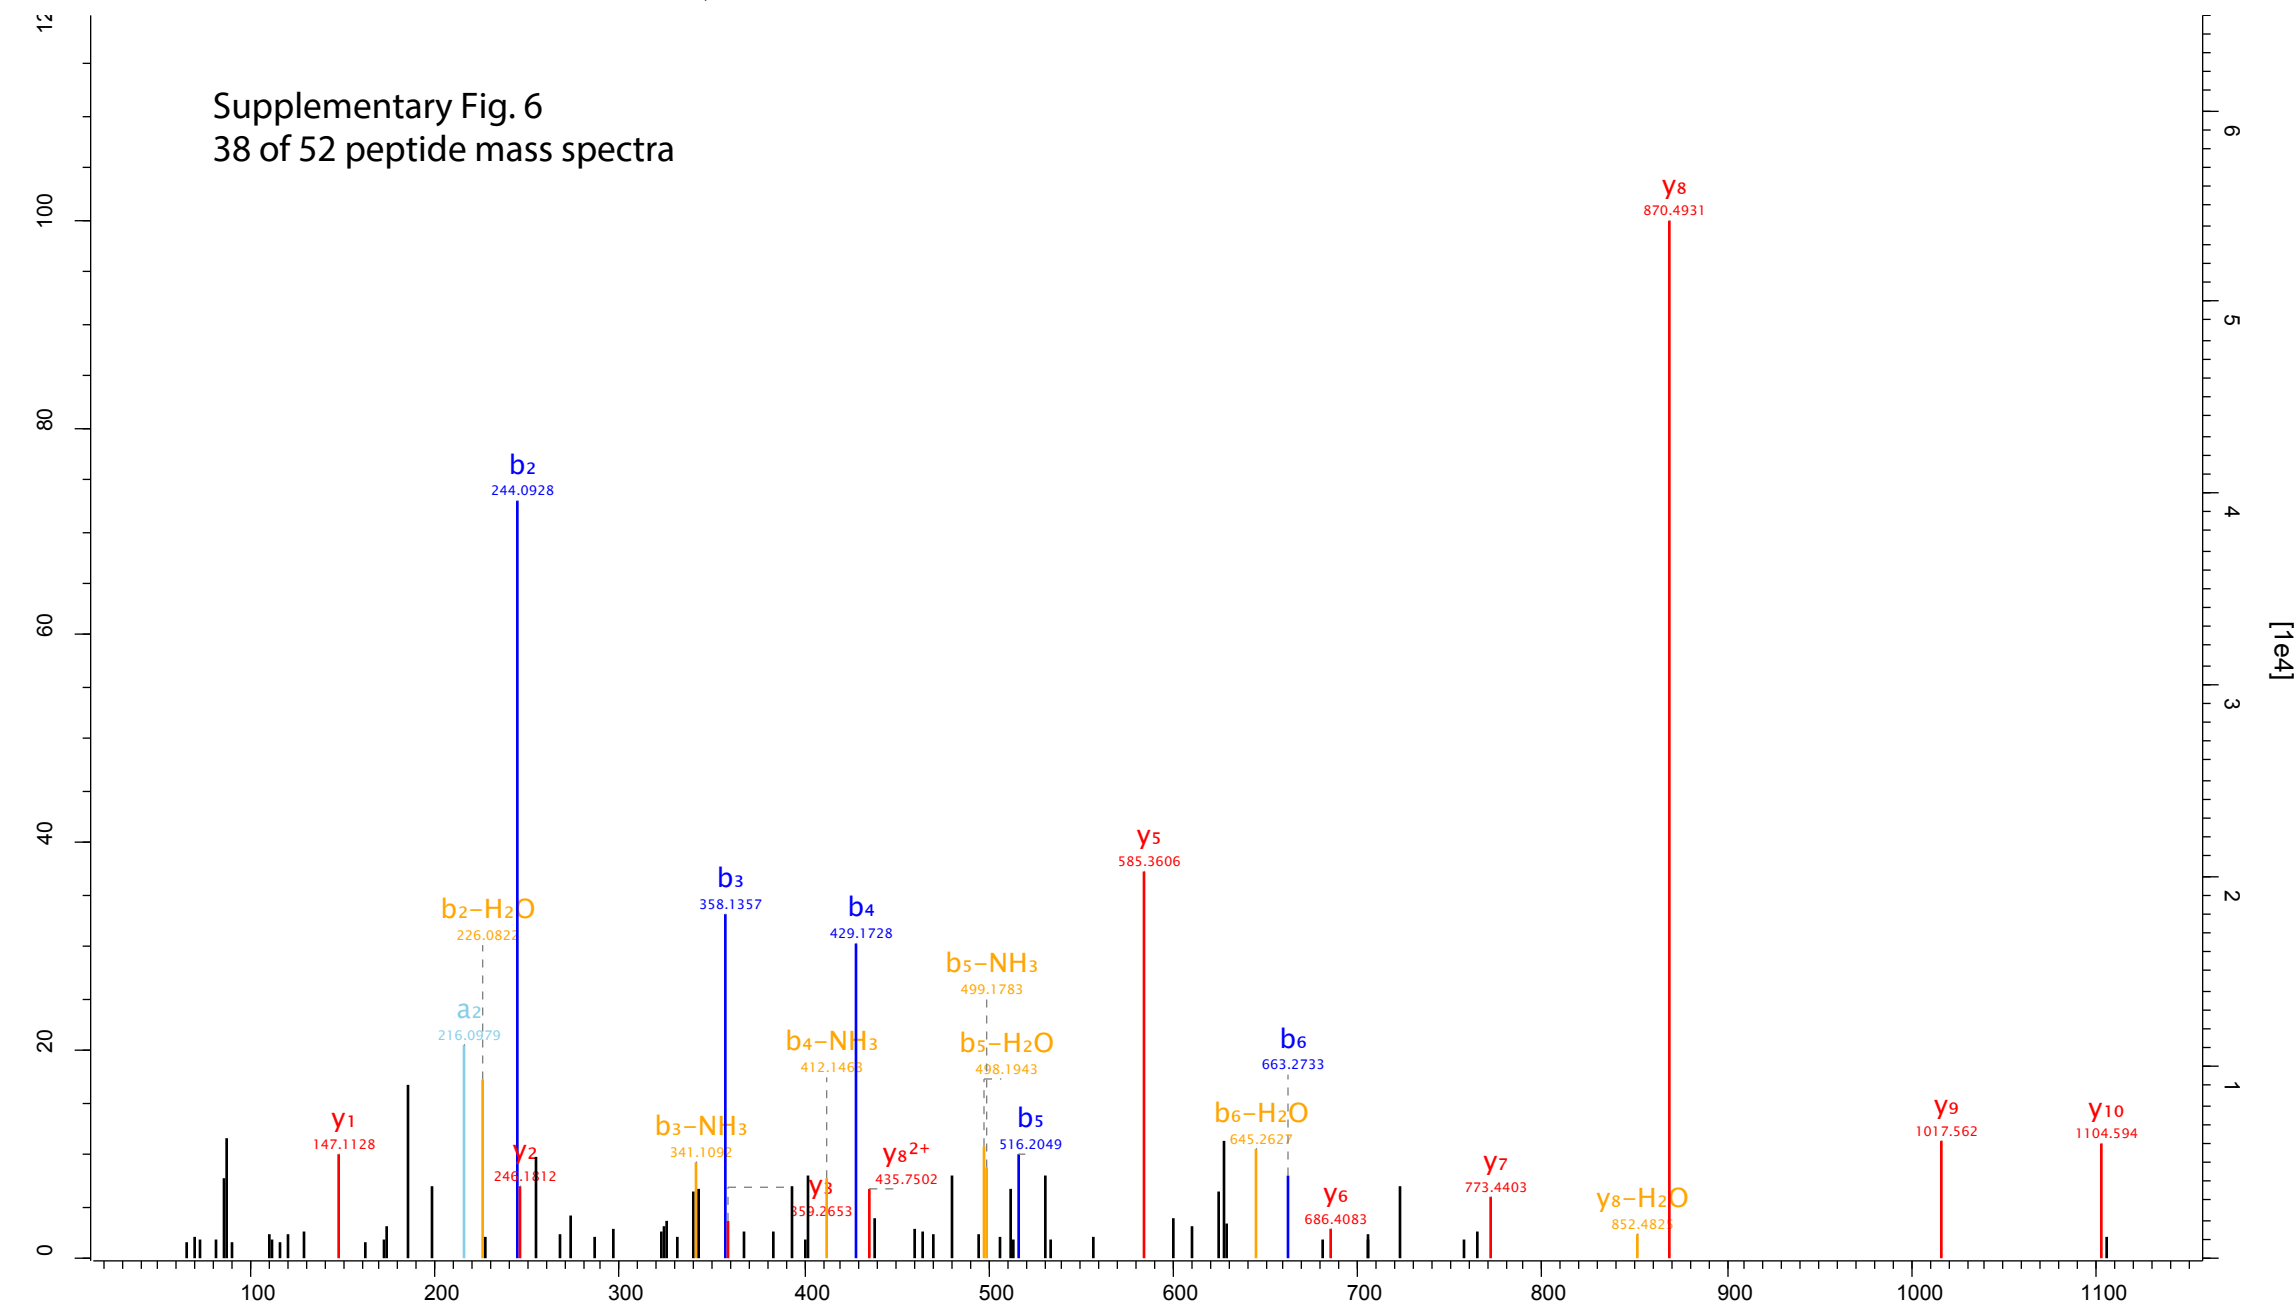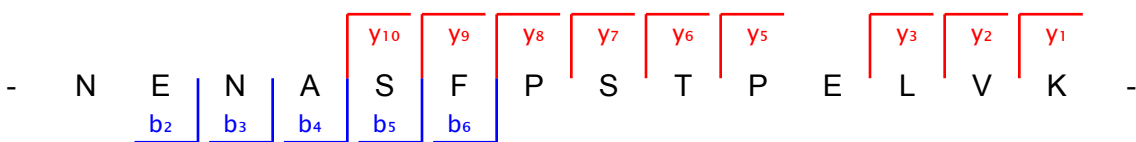

Supplementary Fig. 6  
39 of 52 peptide mass spectra

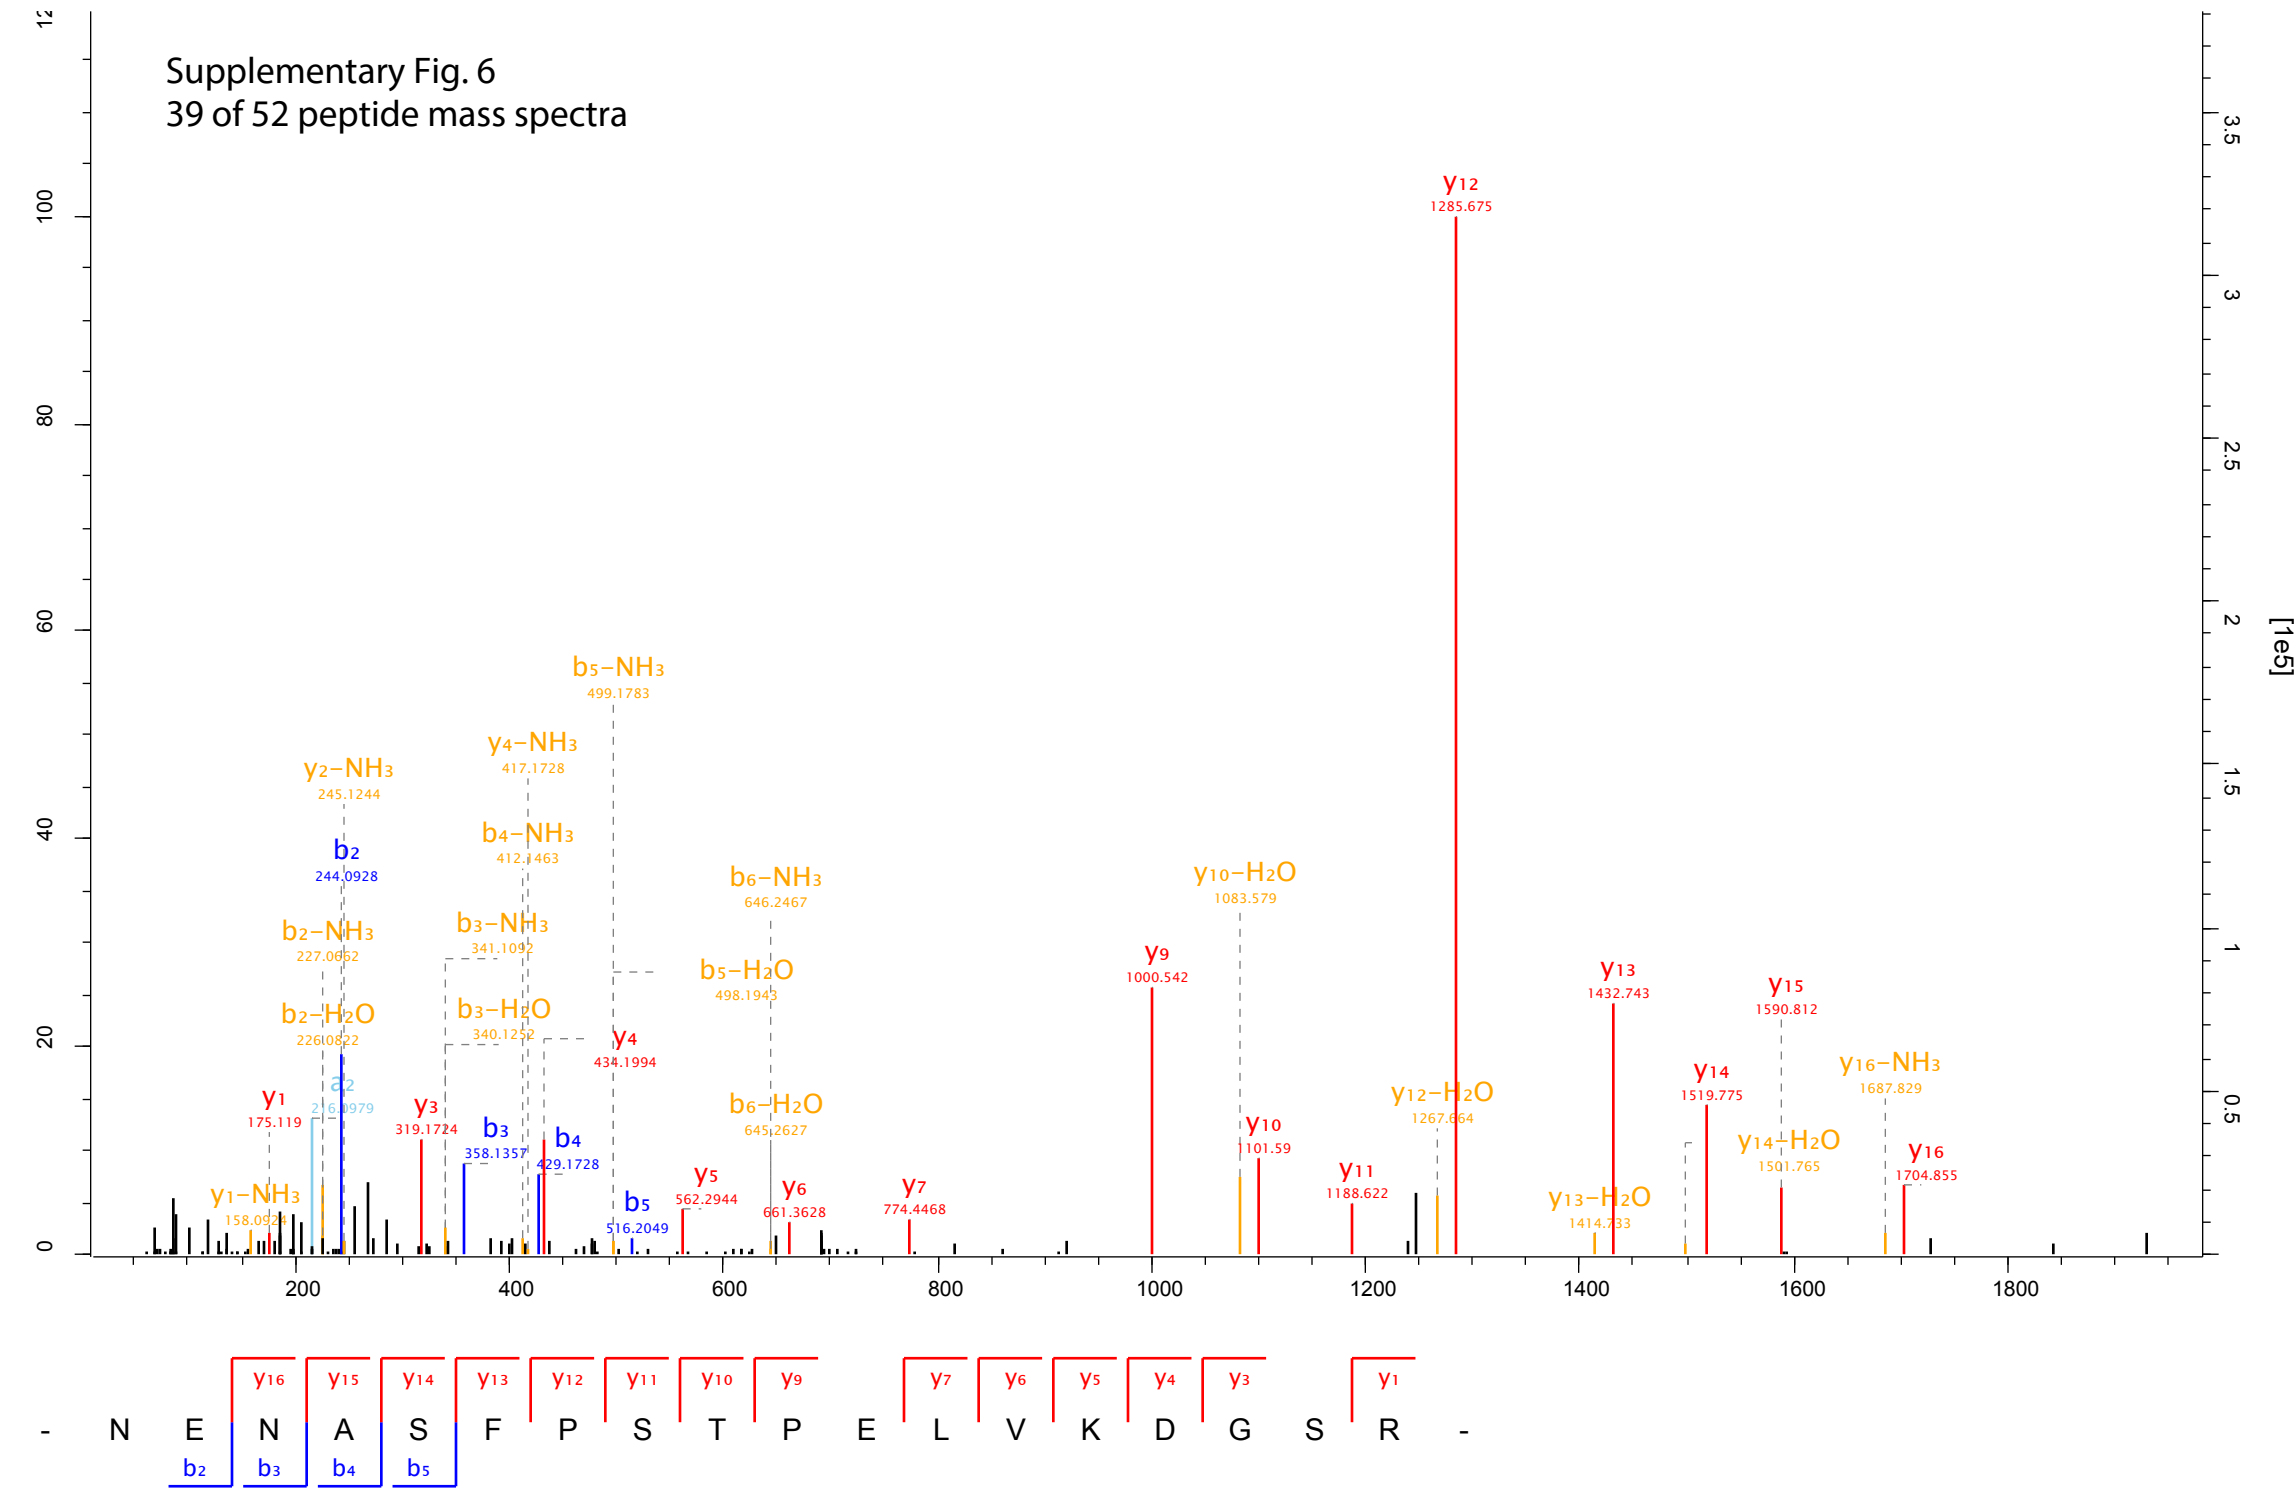

Supplementary Fig. 6  
40 of 52 peptide mass spectra

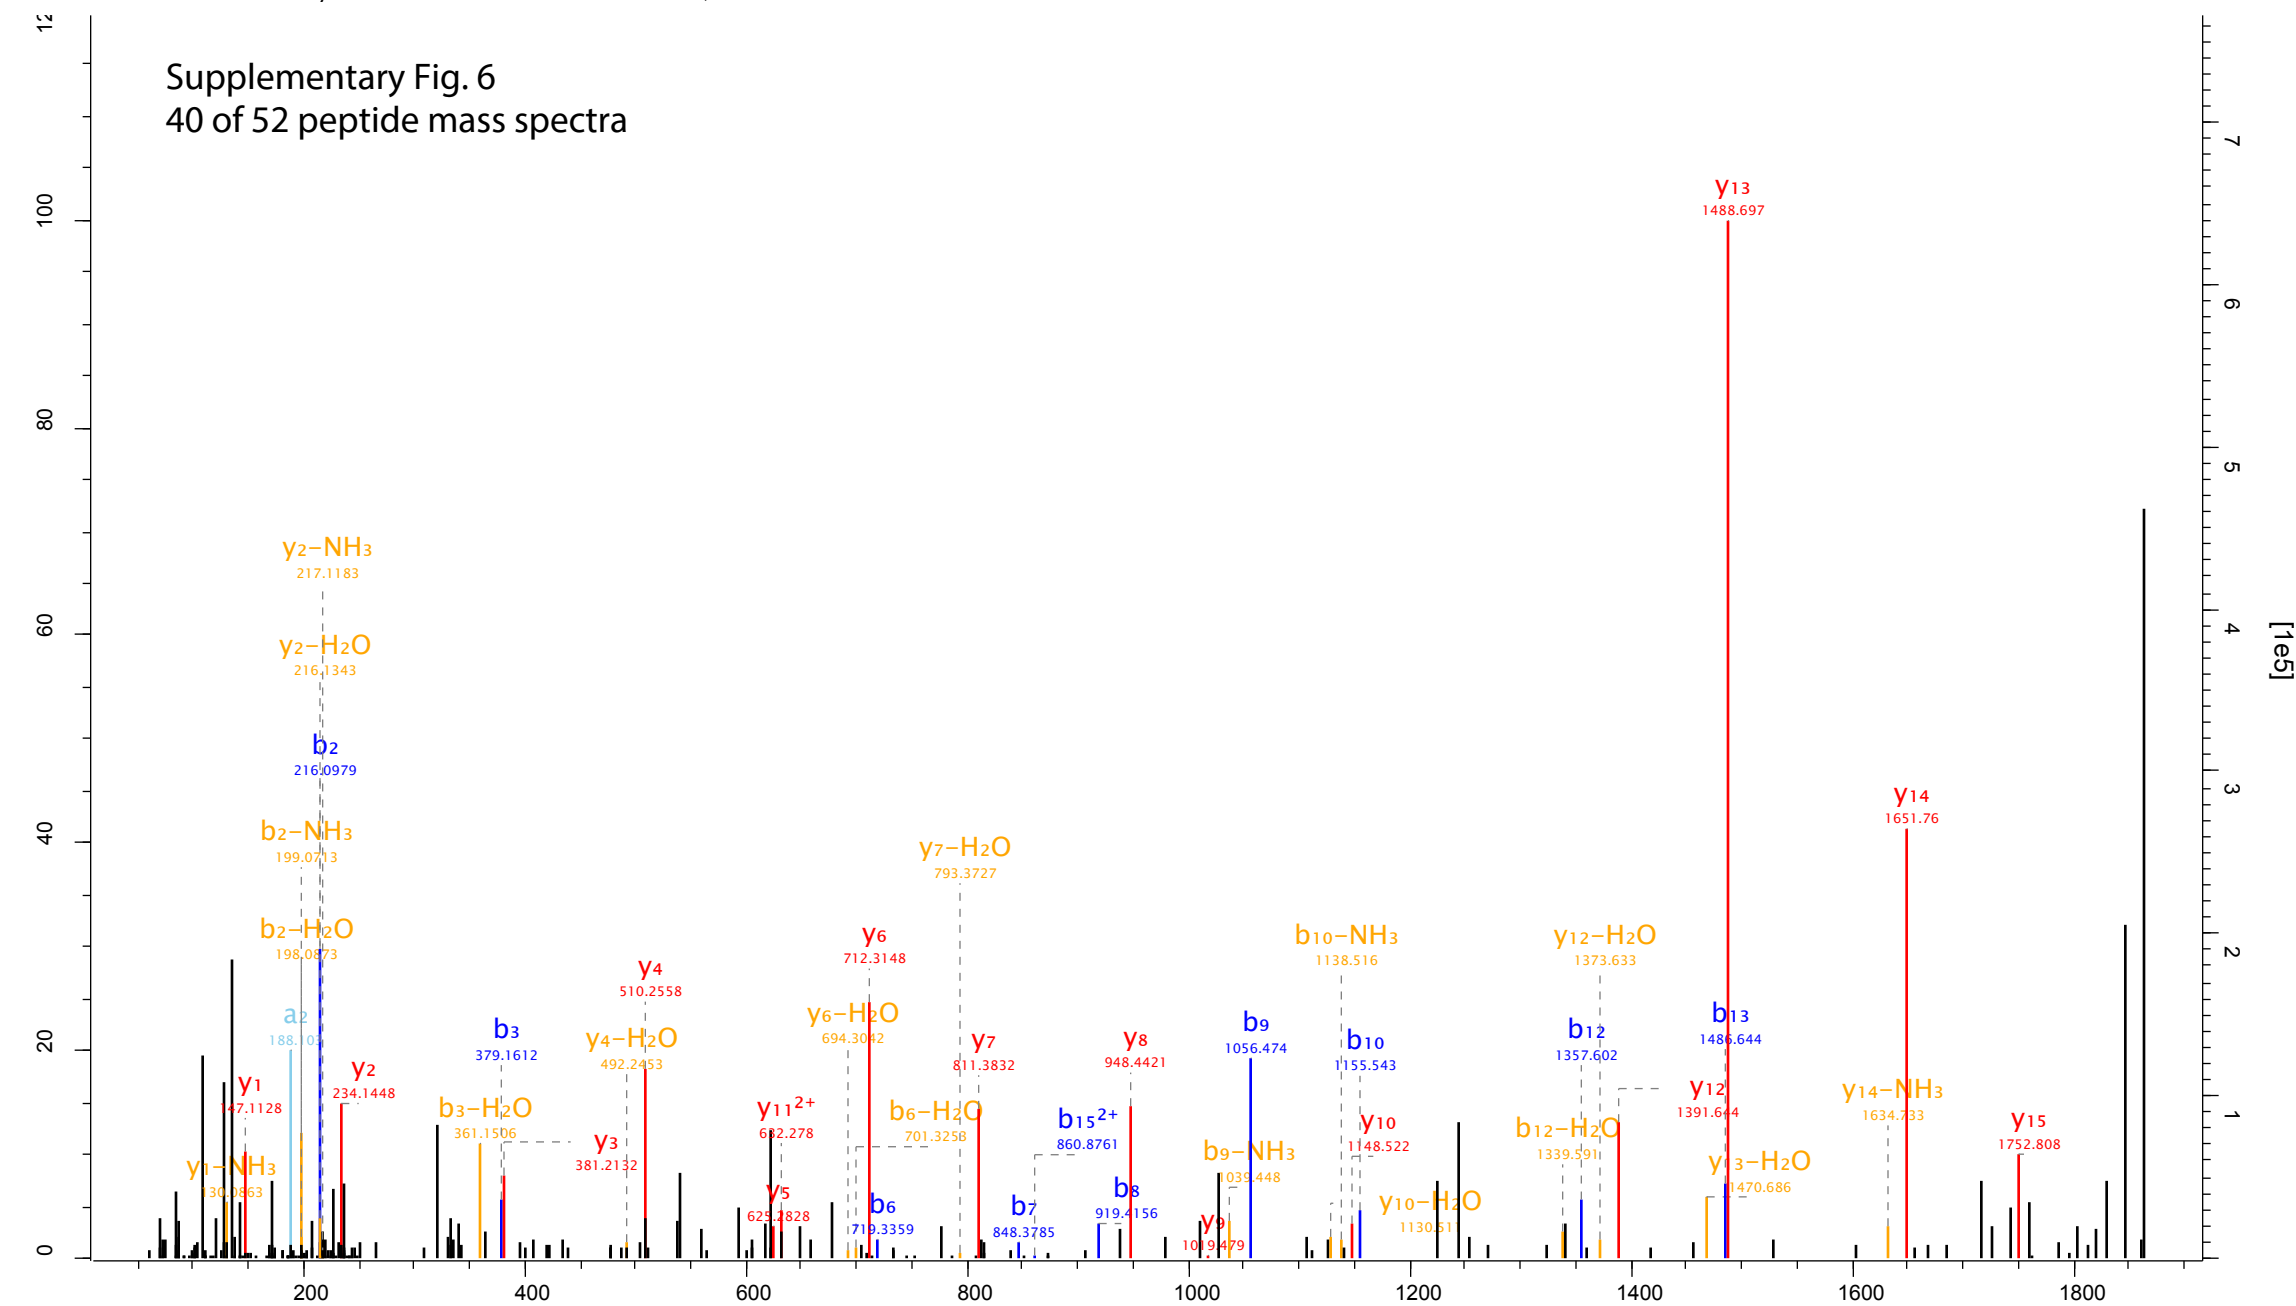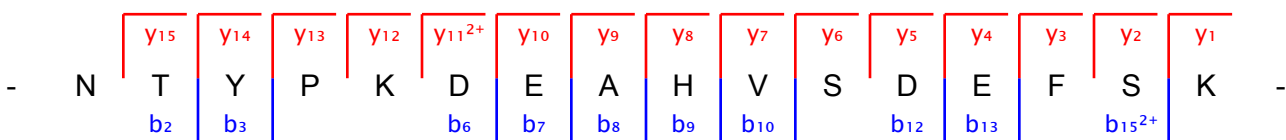

Supplementary Fig. 6  
41 of 52 peptide mass spectra

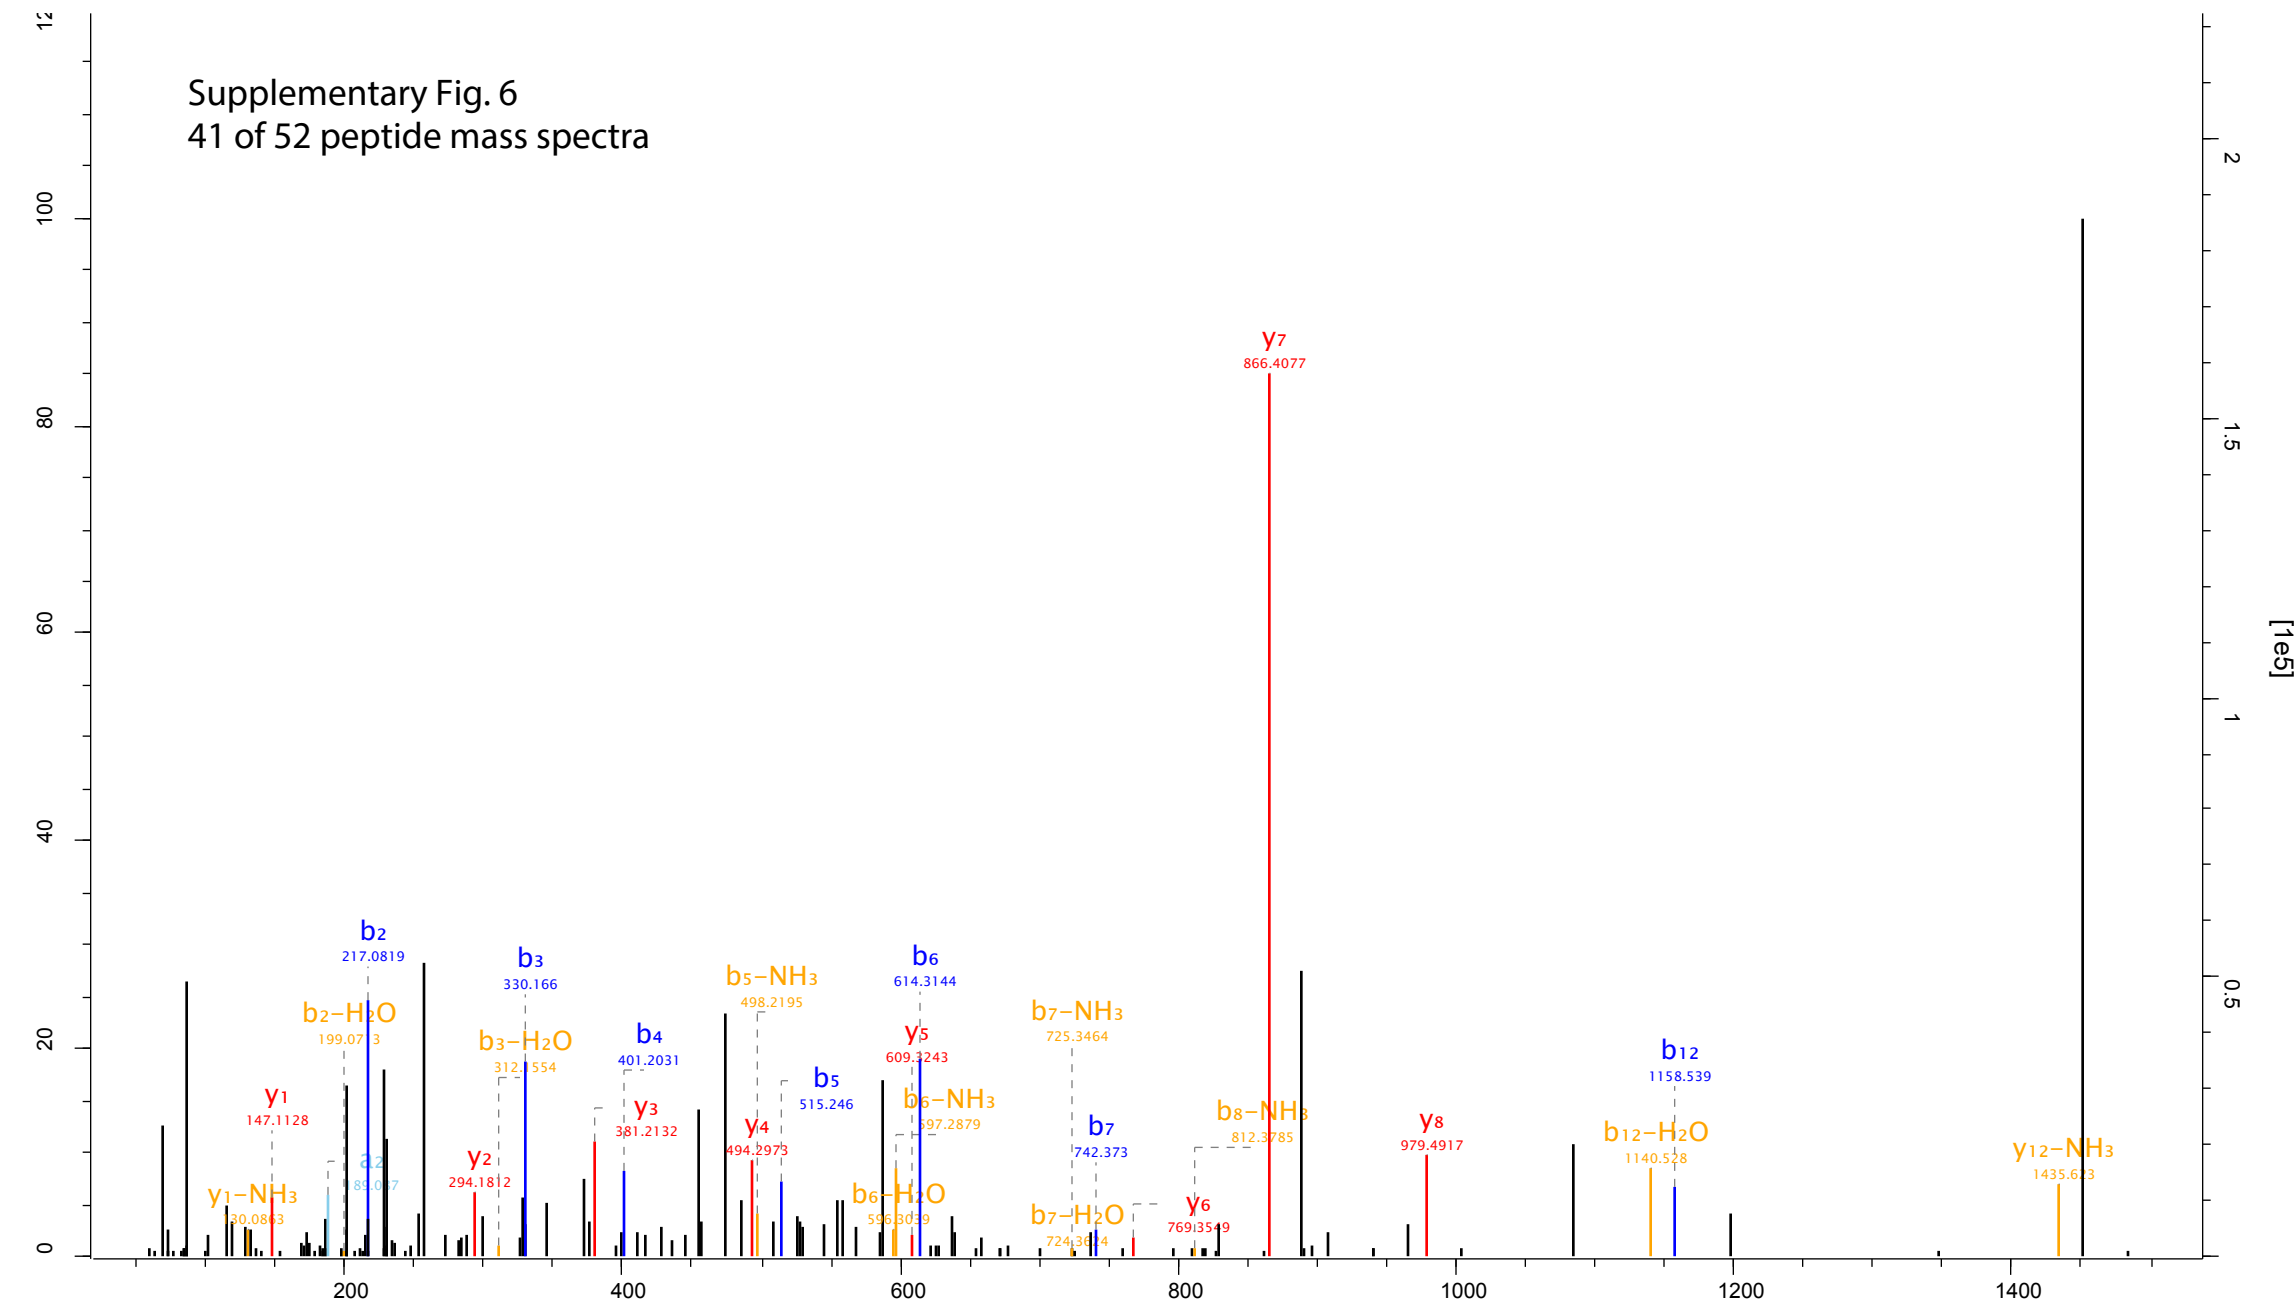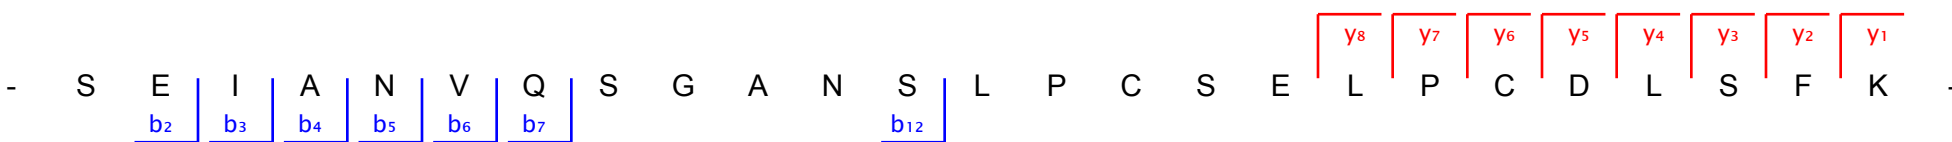

### Supplementary Fig. 6 42 of 52 peptide mass spectra

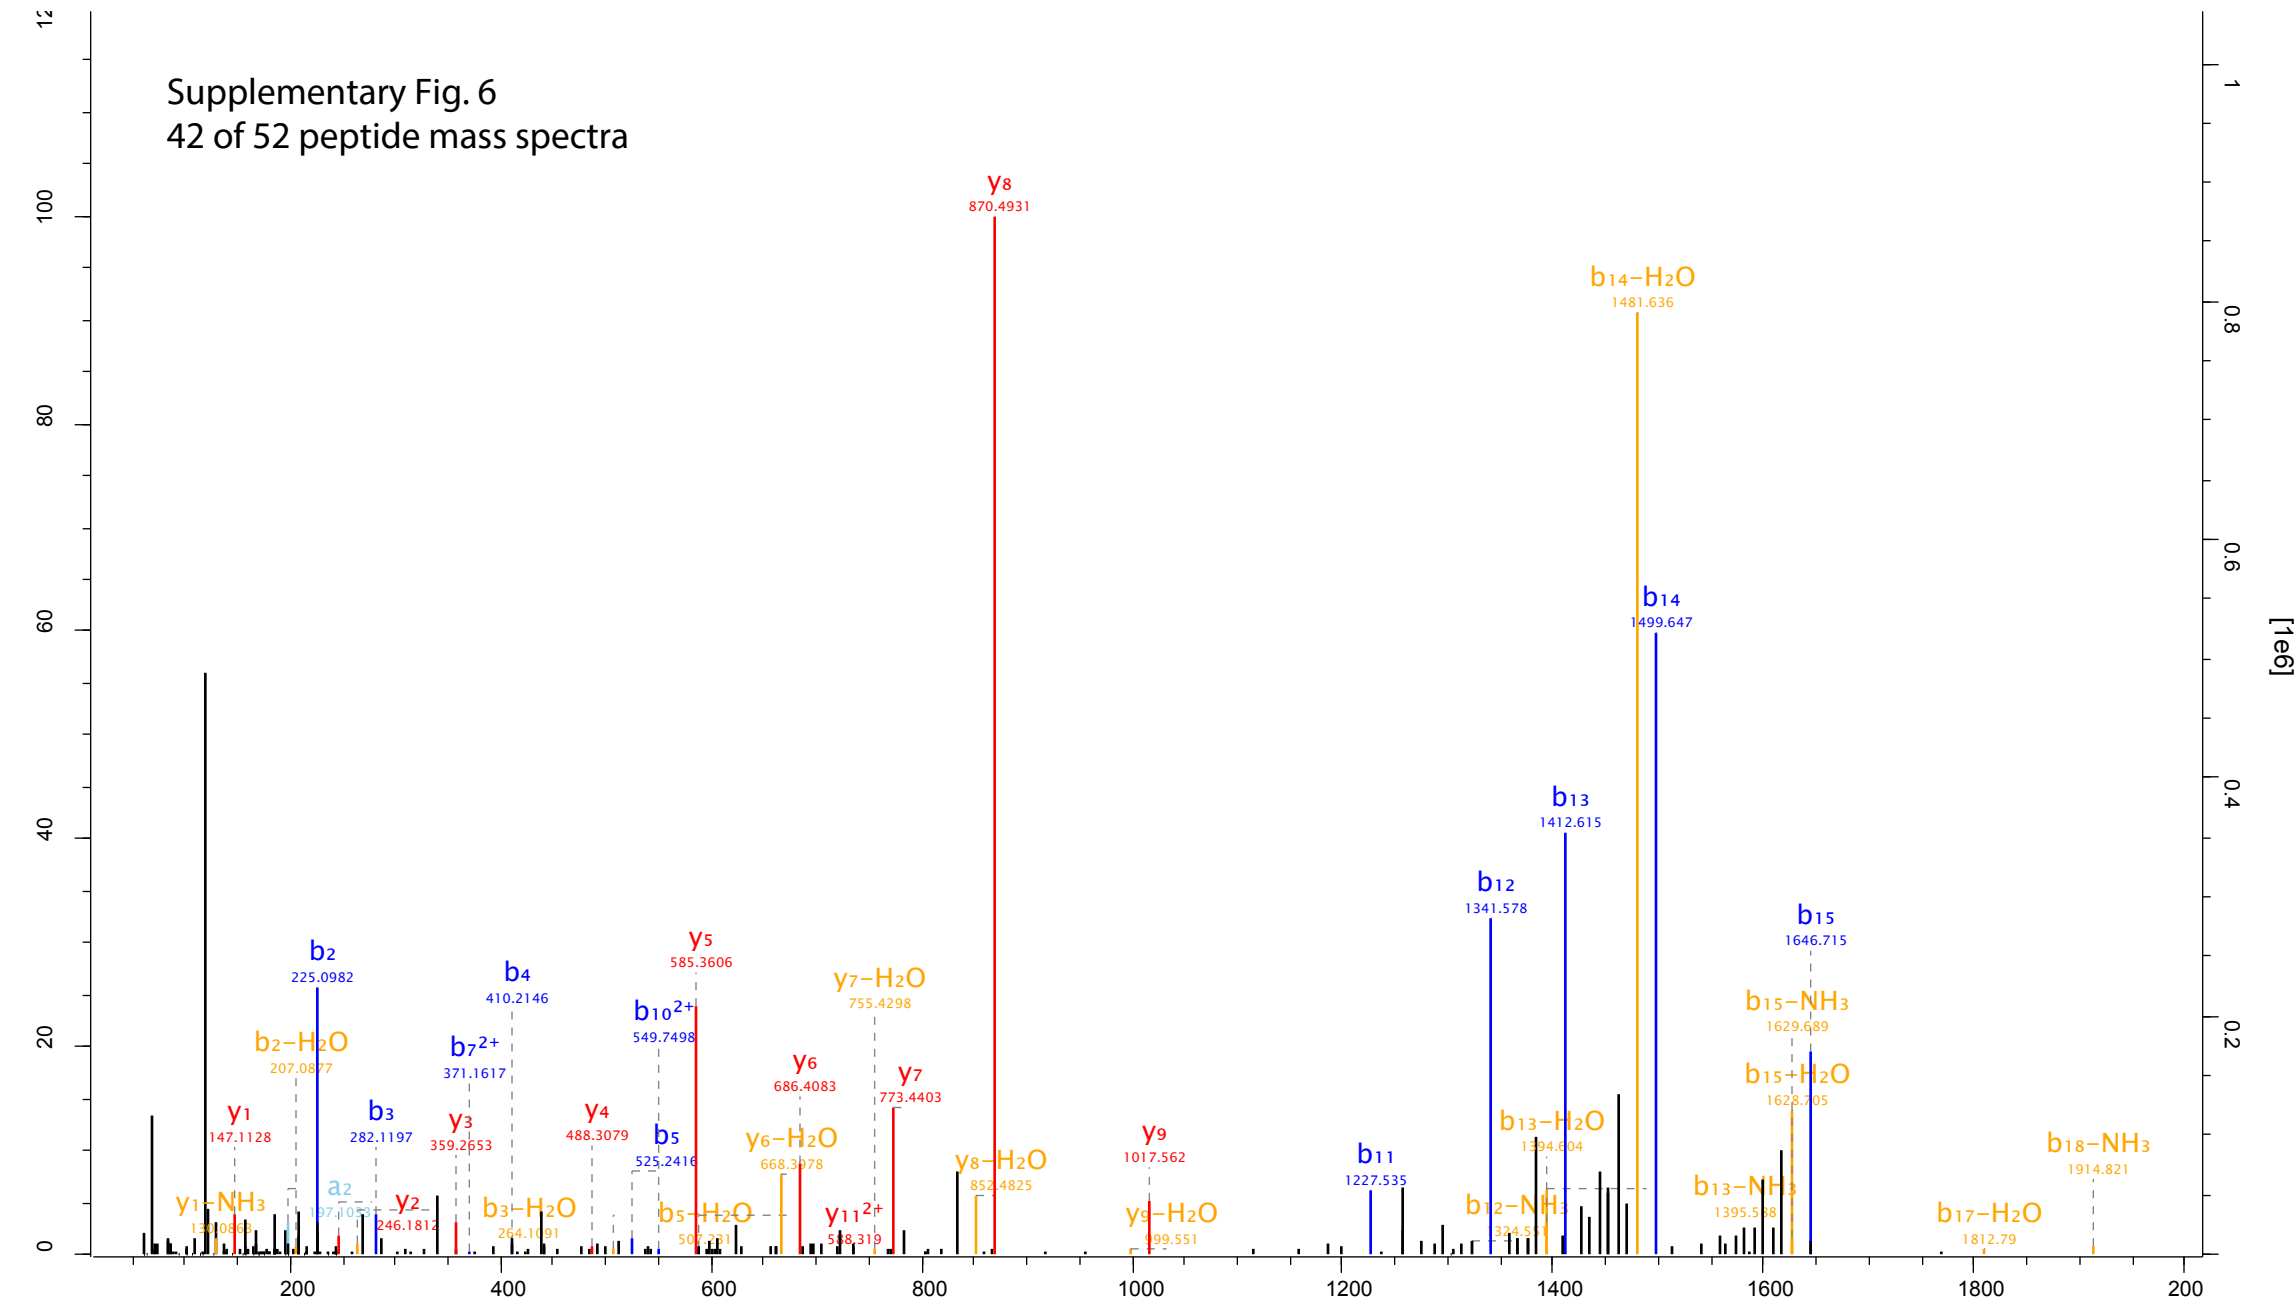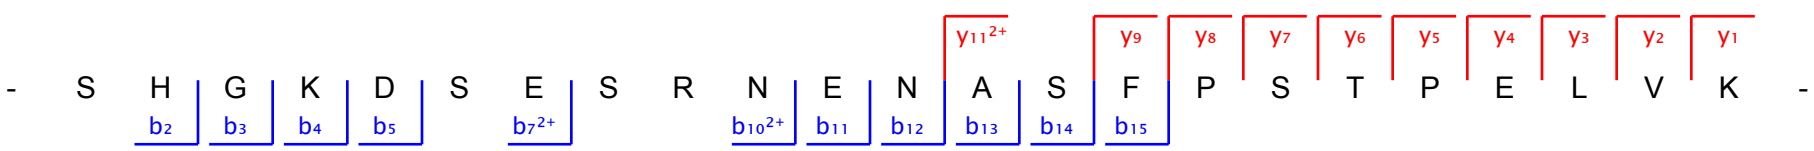

Supplementary Fig. 6  
43 of 52 peptide mass spectra

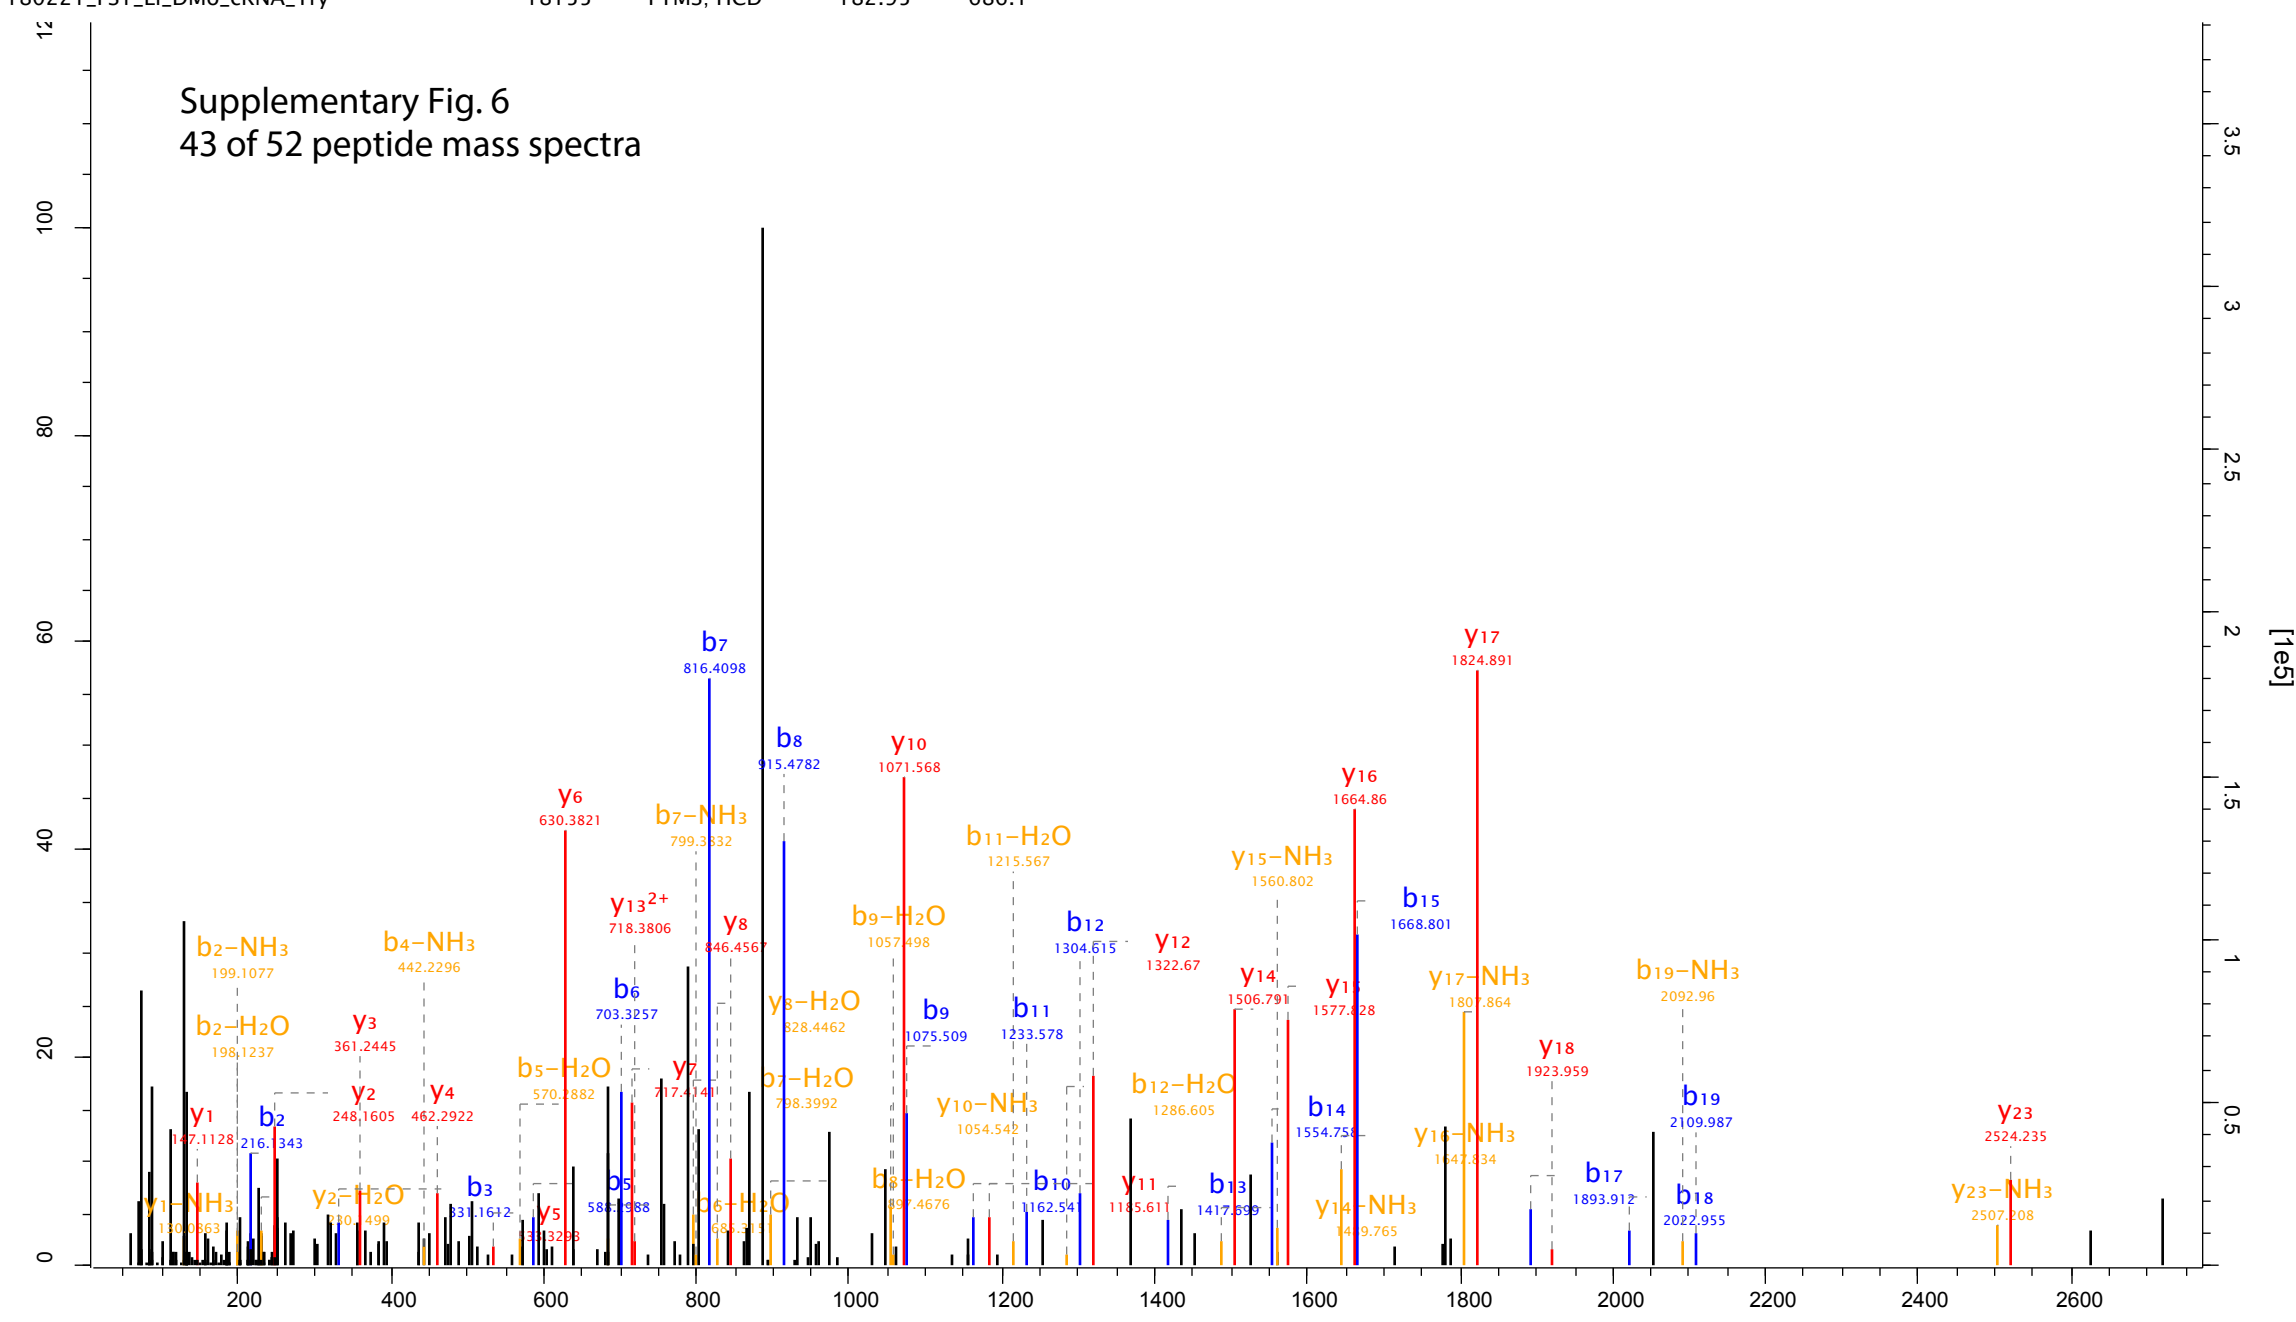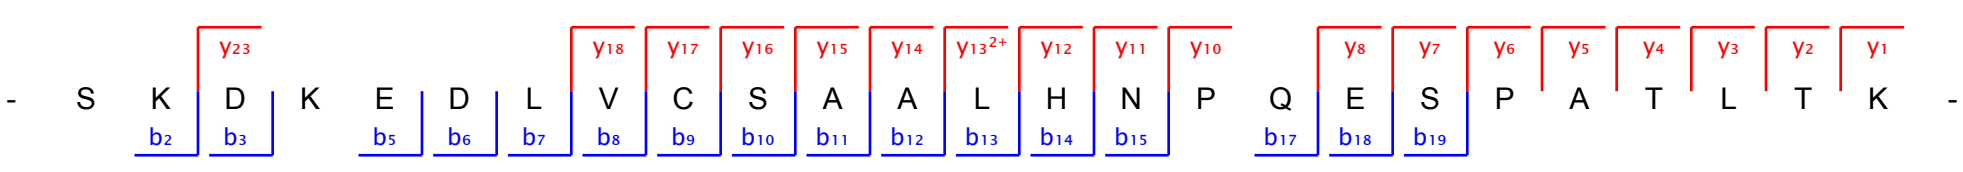

Supplementary Fig. 6  
44 of 52 peptide mass spectra

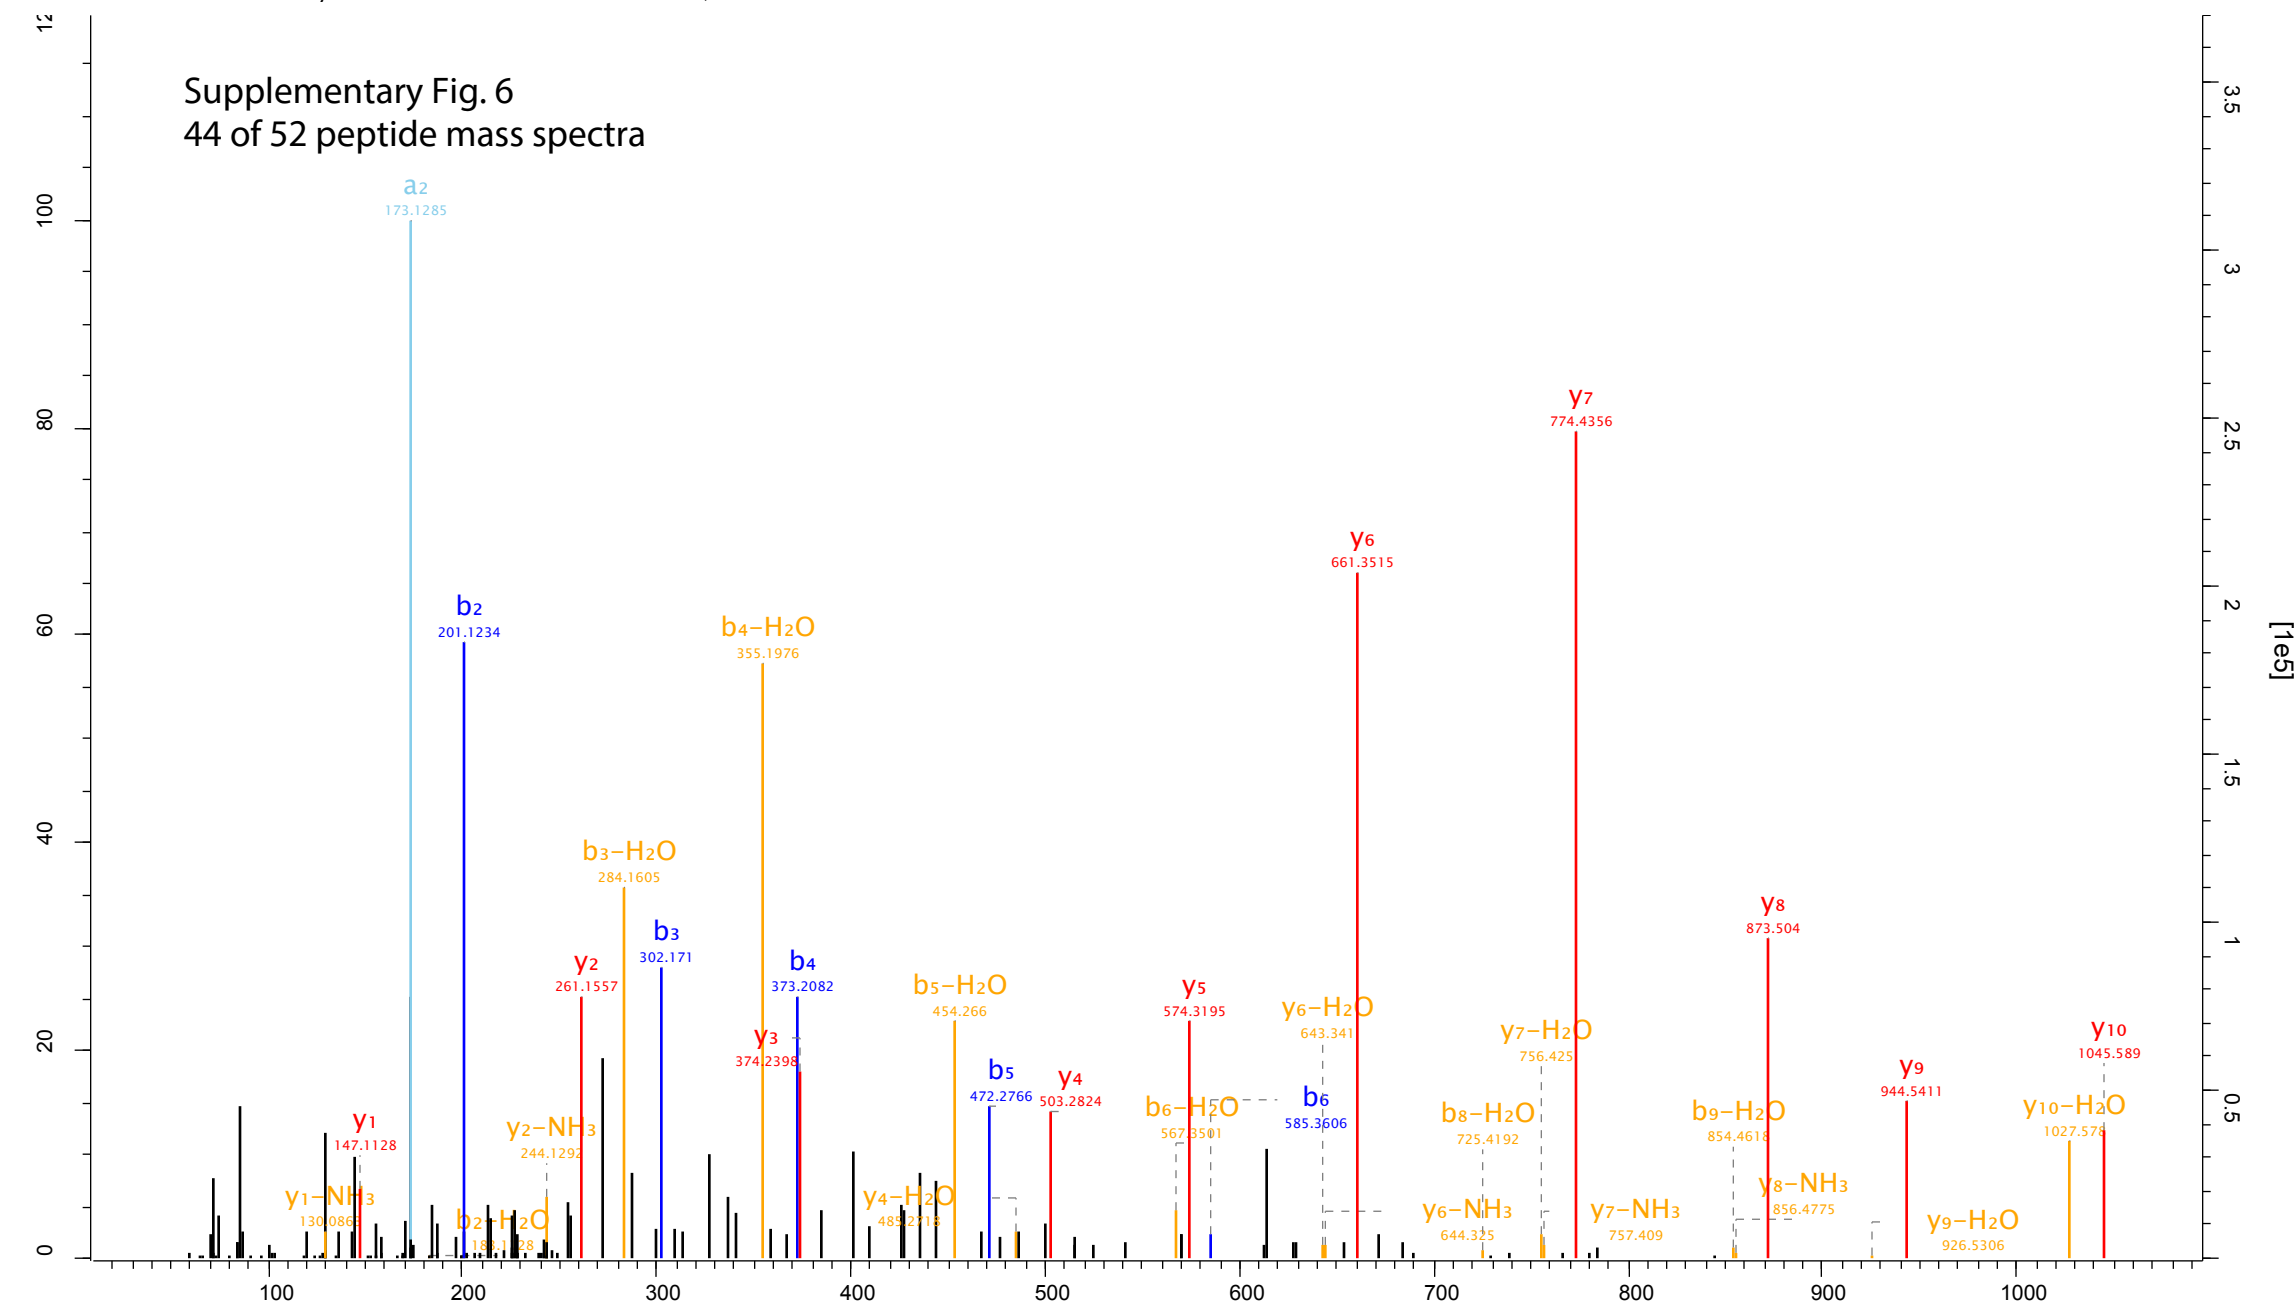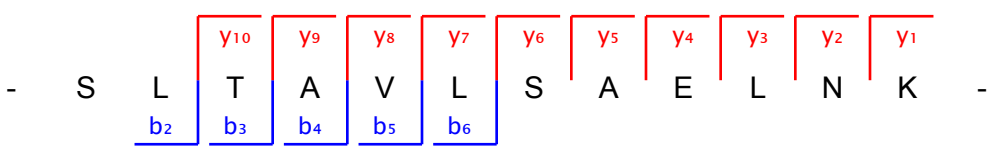



Supplementary Fig. 6  
45 of 52 peptide mass spectra

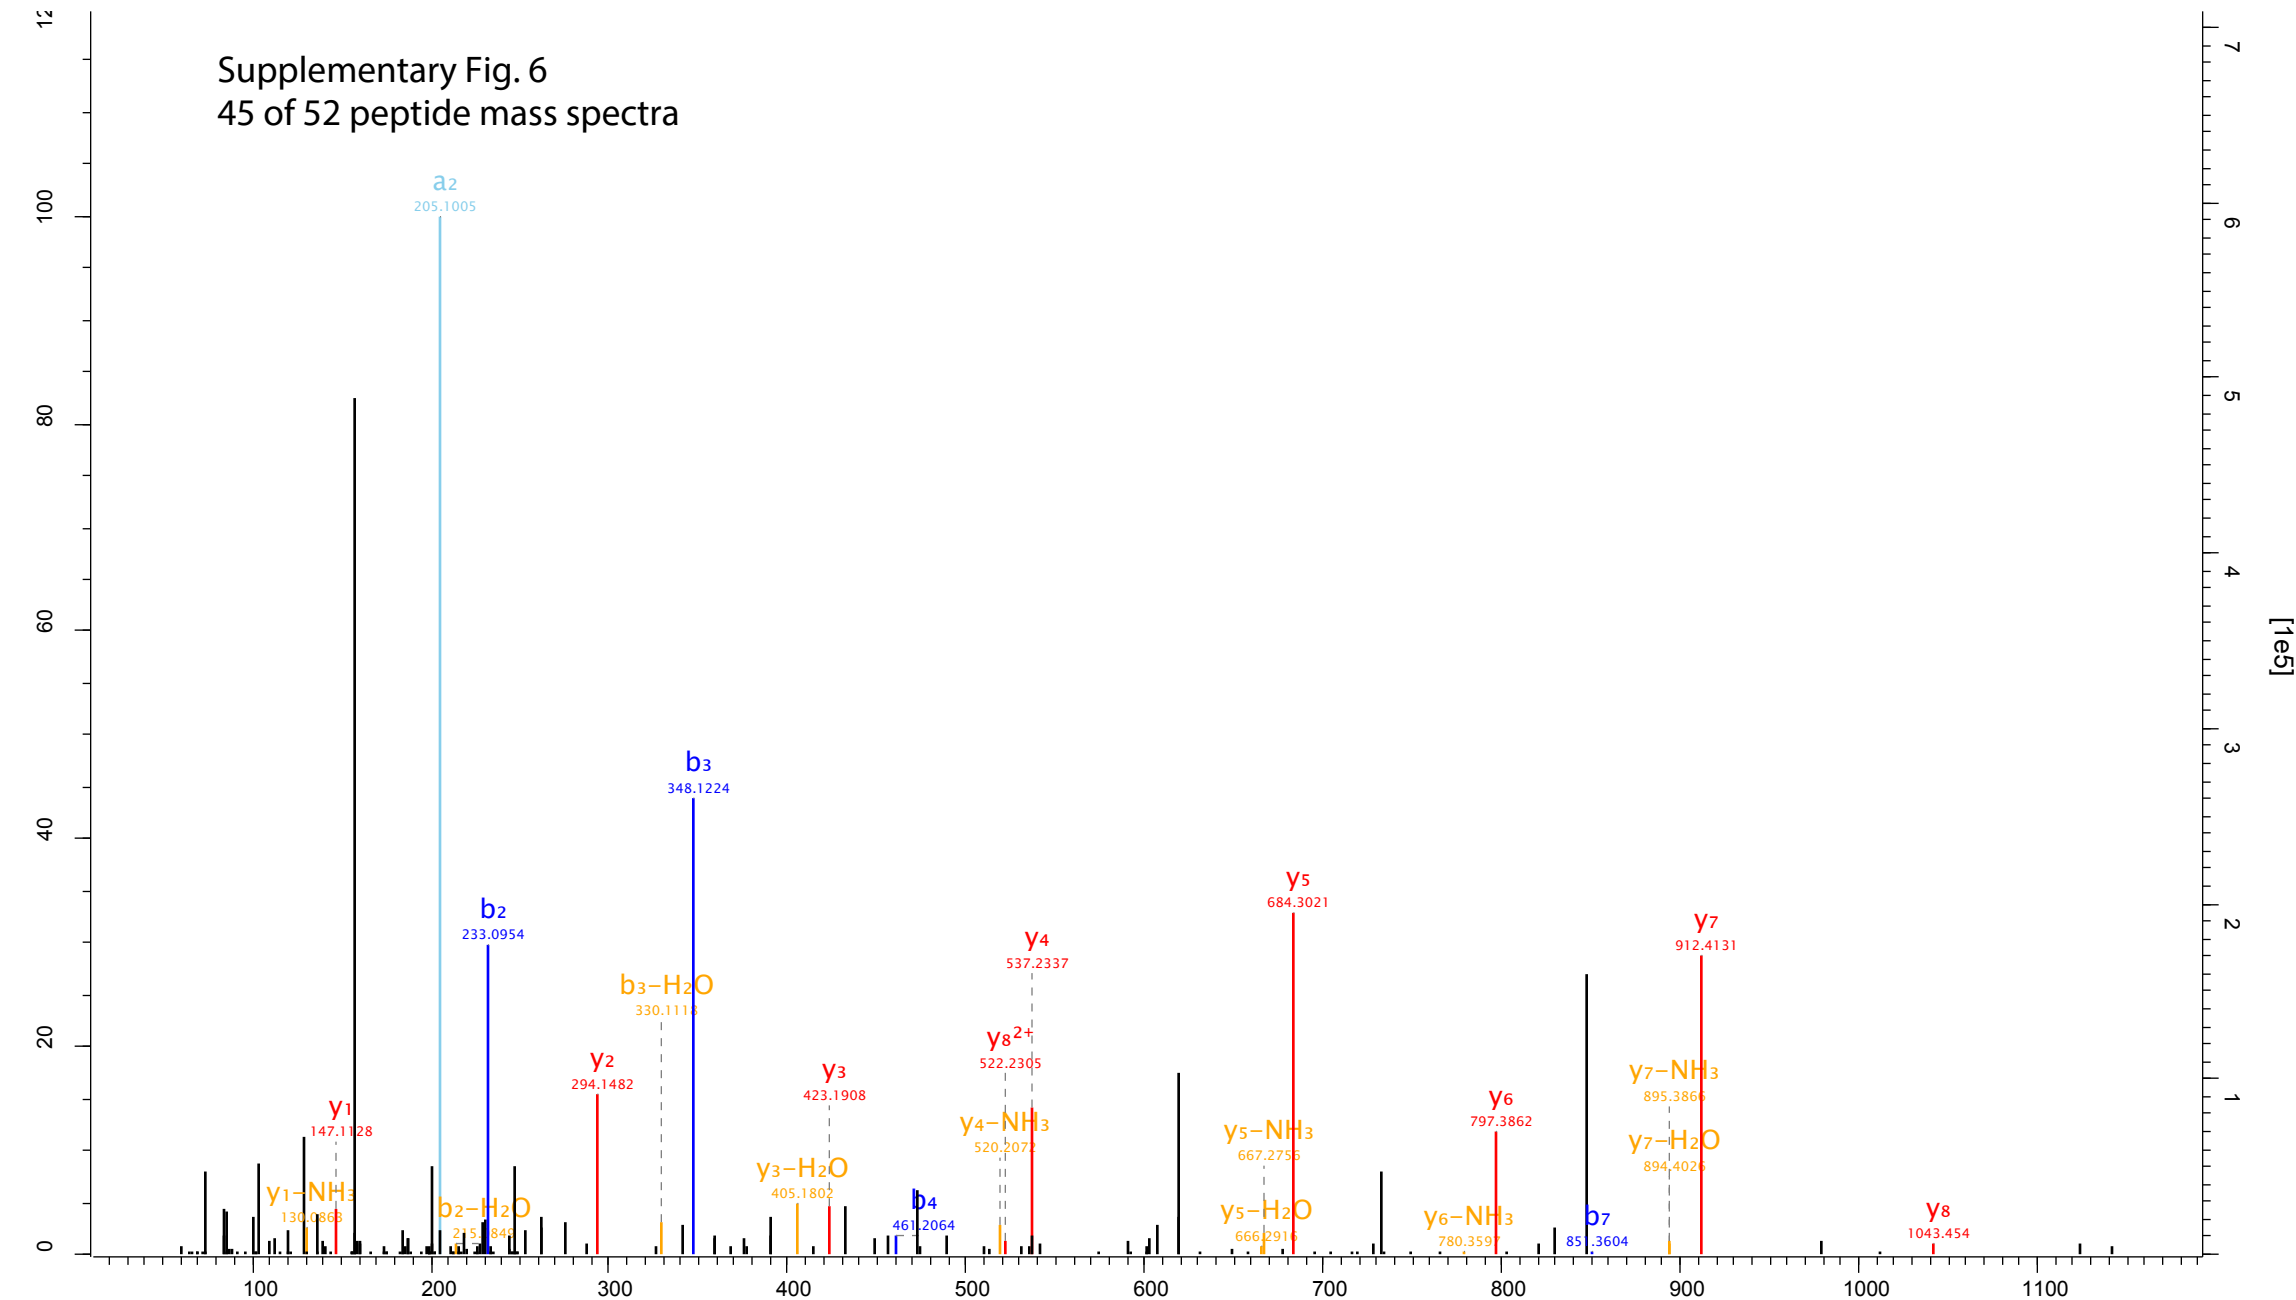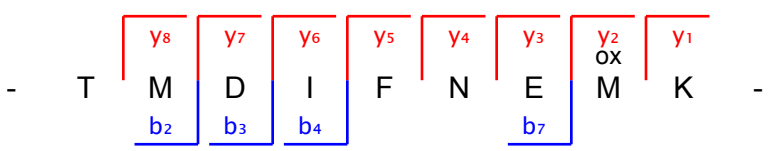

Raw file 180221\_FS1\_Li\_DMo\_cRNA\_F\_P Scan 32825 Method FTMS; HCD Score 69.52 m/z 888.44

Supplementary Fig. 6  
46 of 52 peptide mass spectra

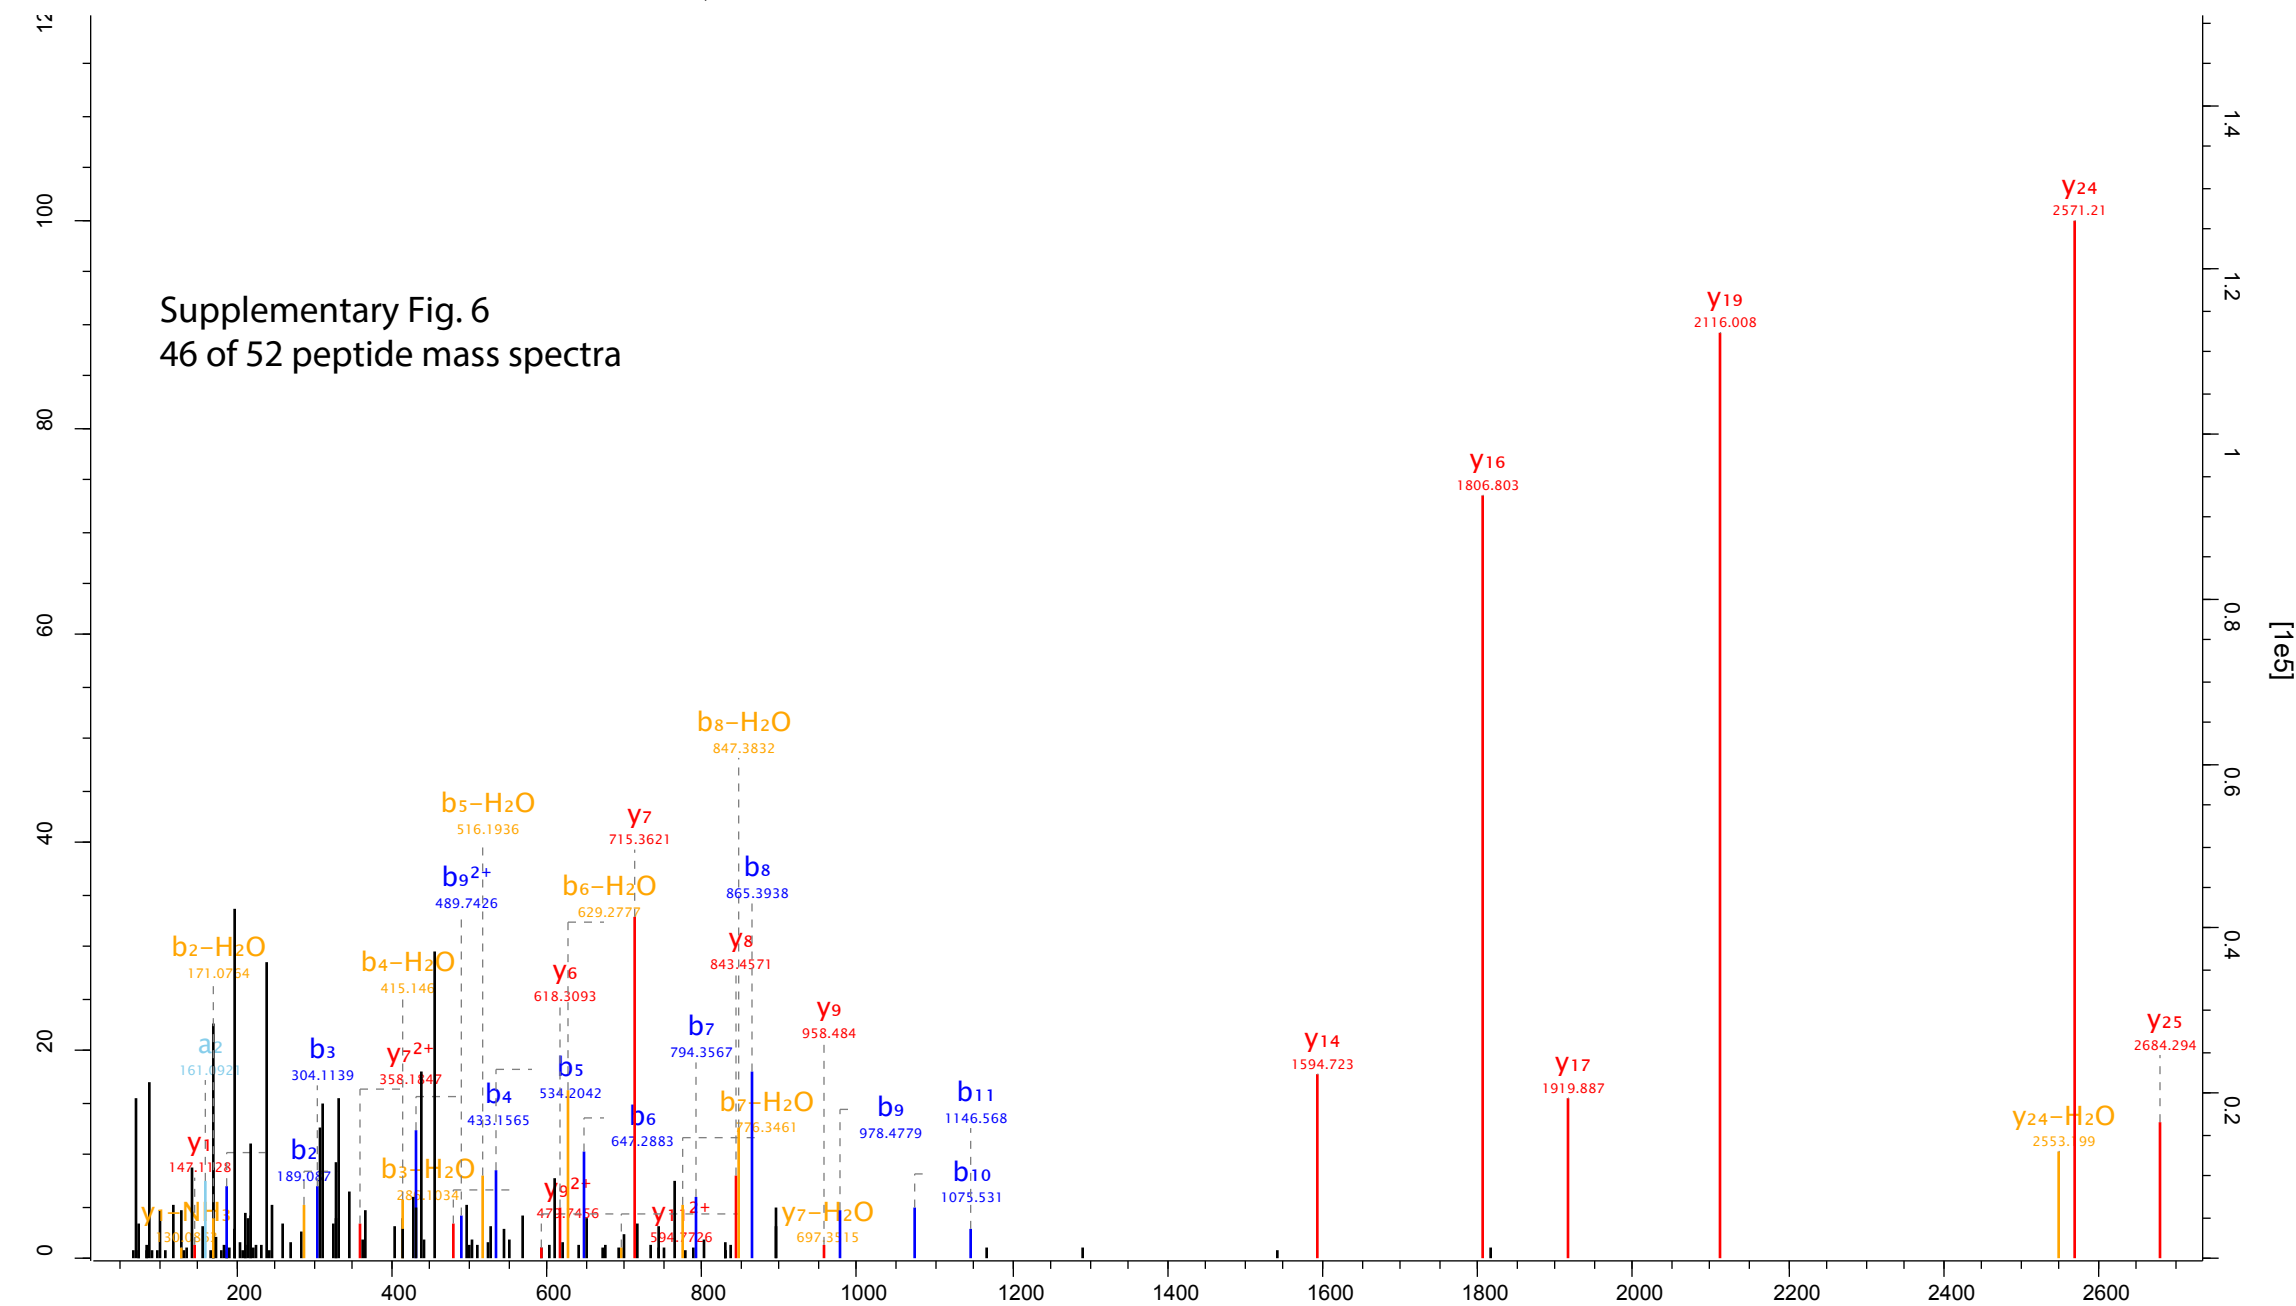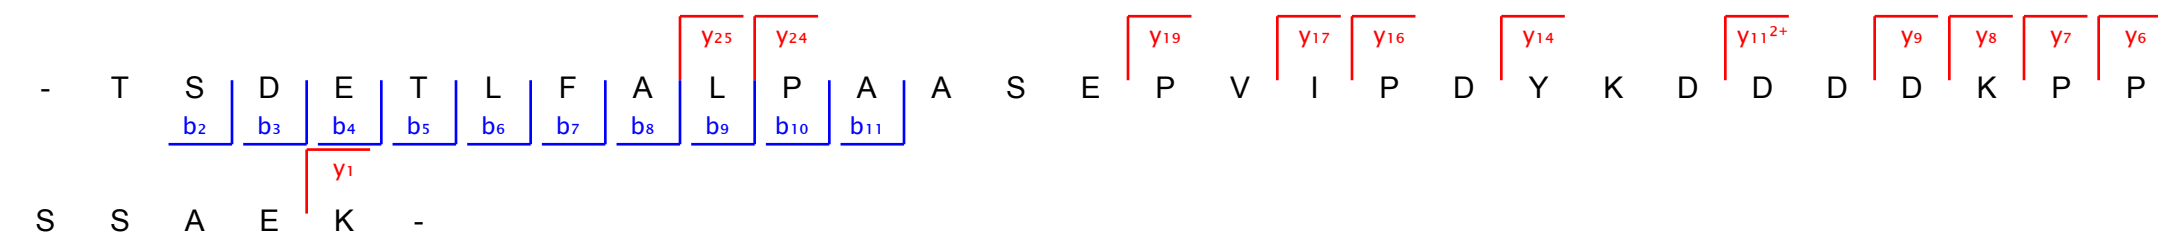

Supplementary Fig. 6  
47 of 52 peptide mass spectra

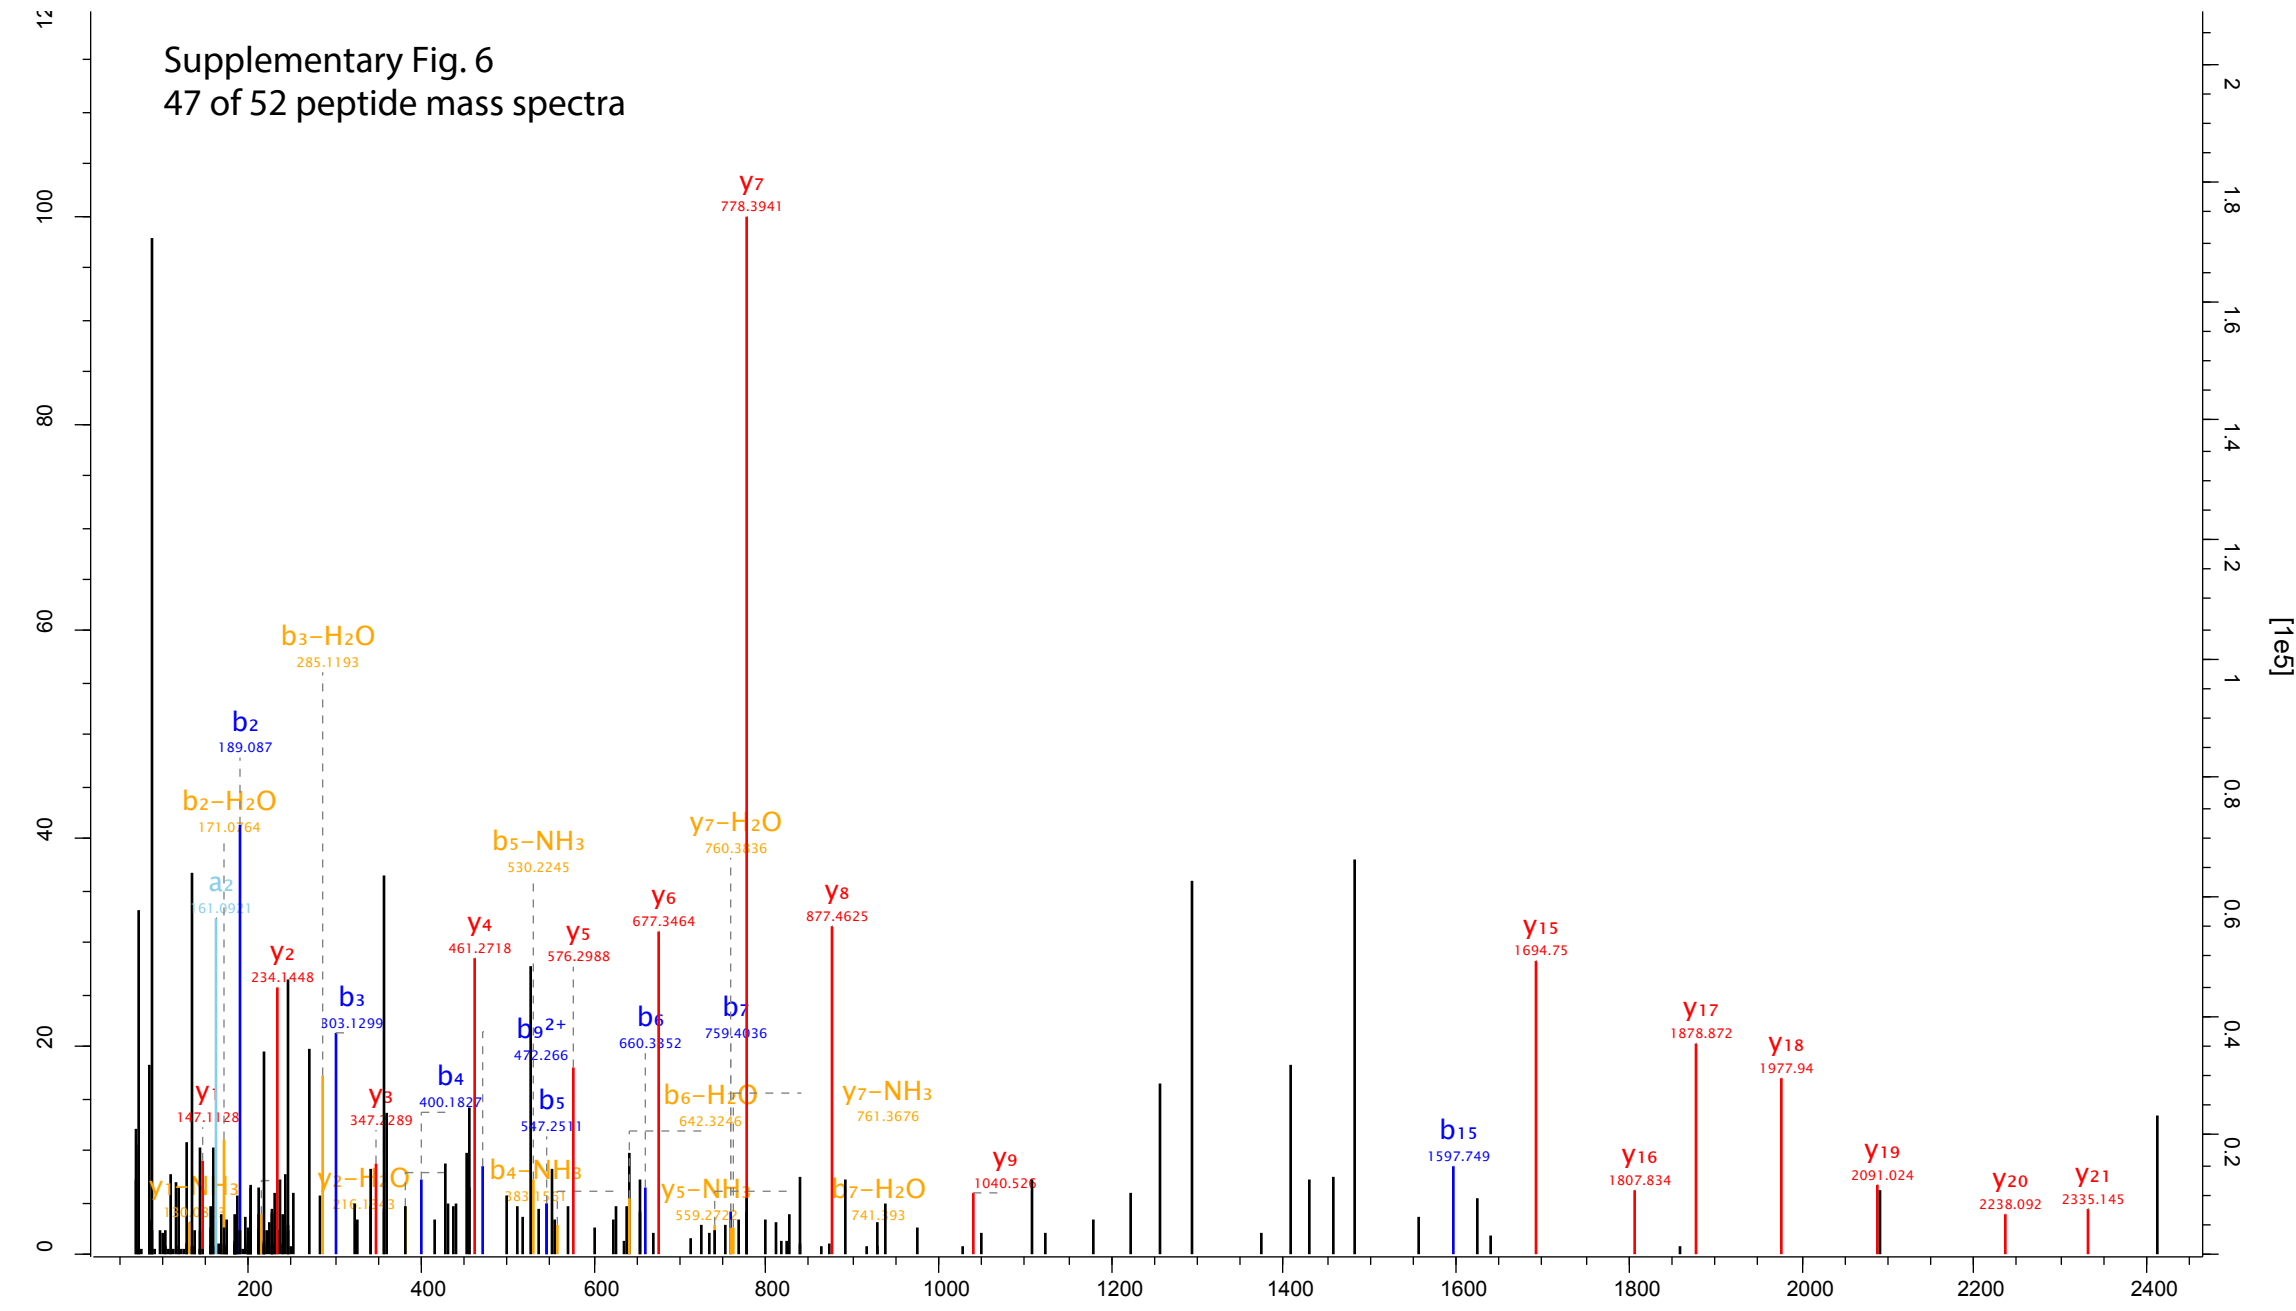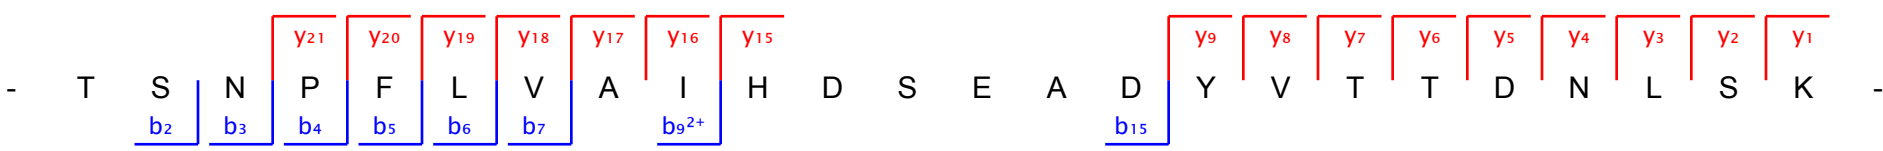

Supplementary Fig. 6  
48 of 52 peptide mass spectra

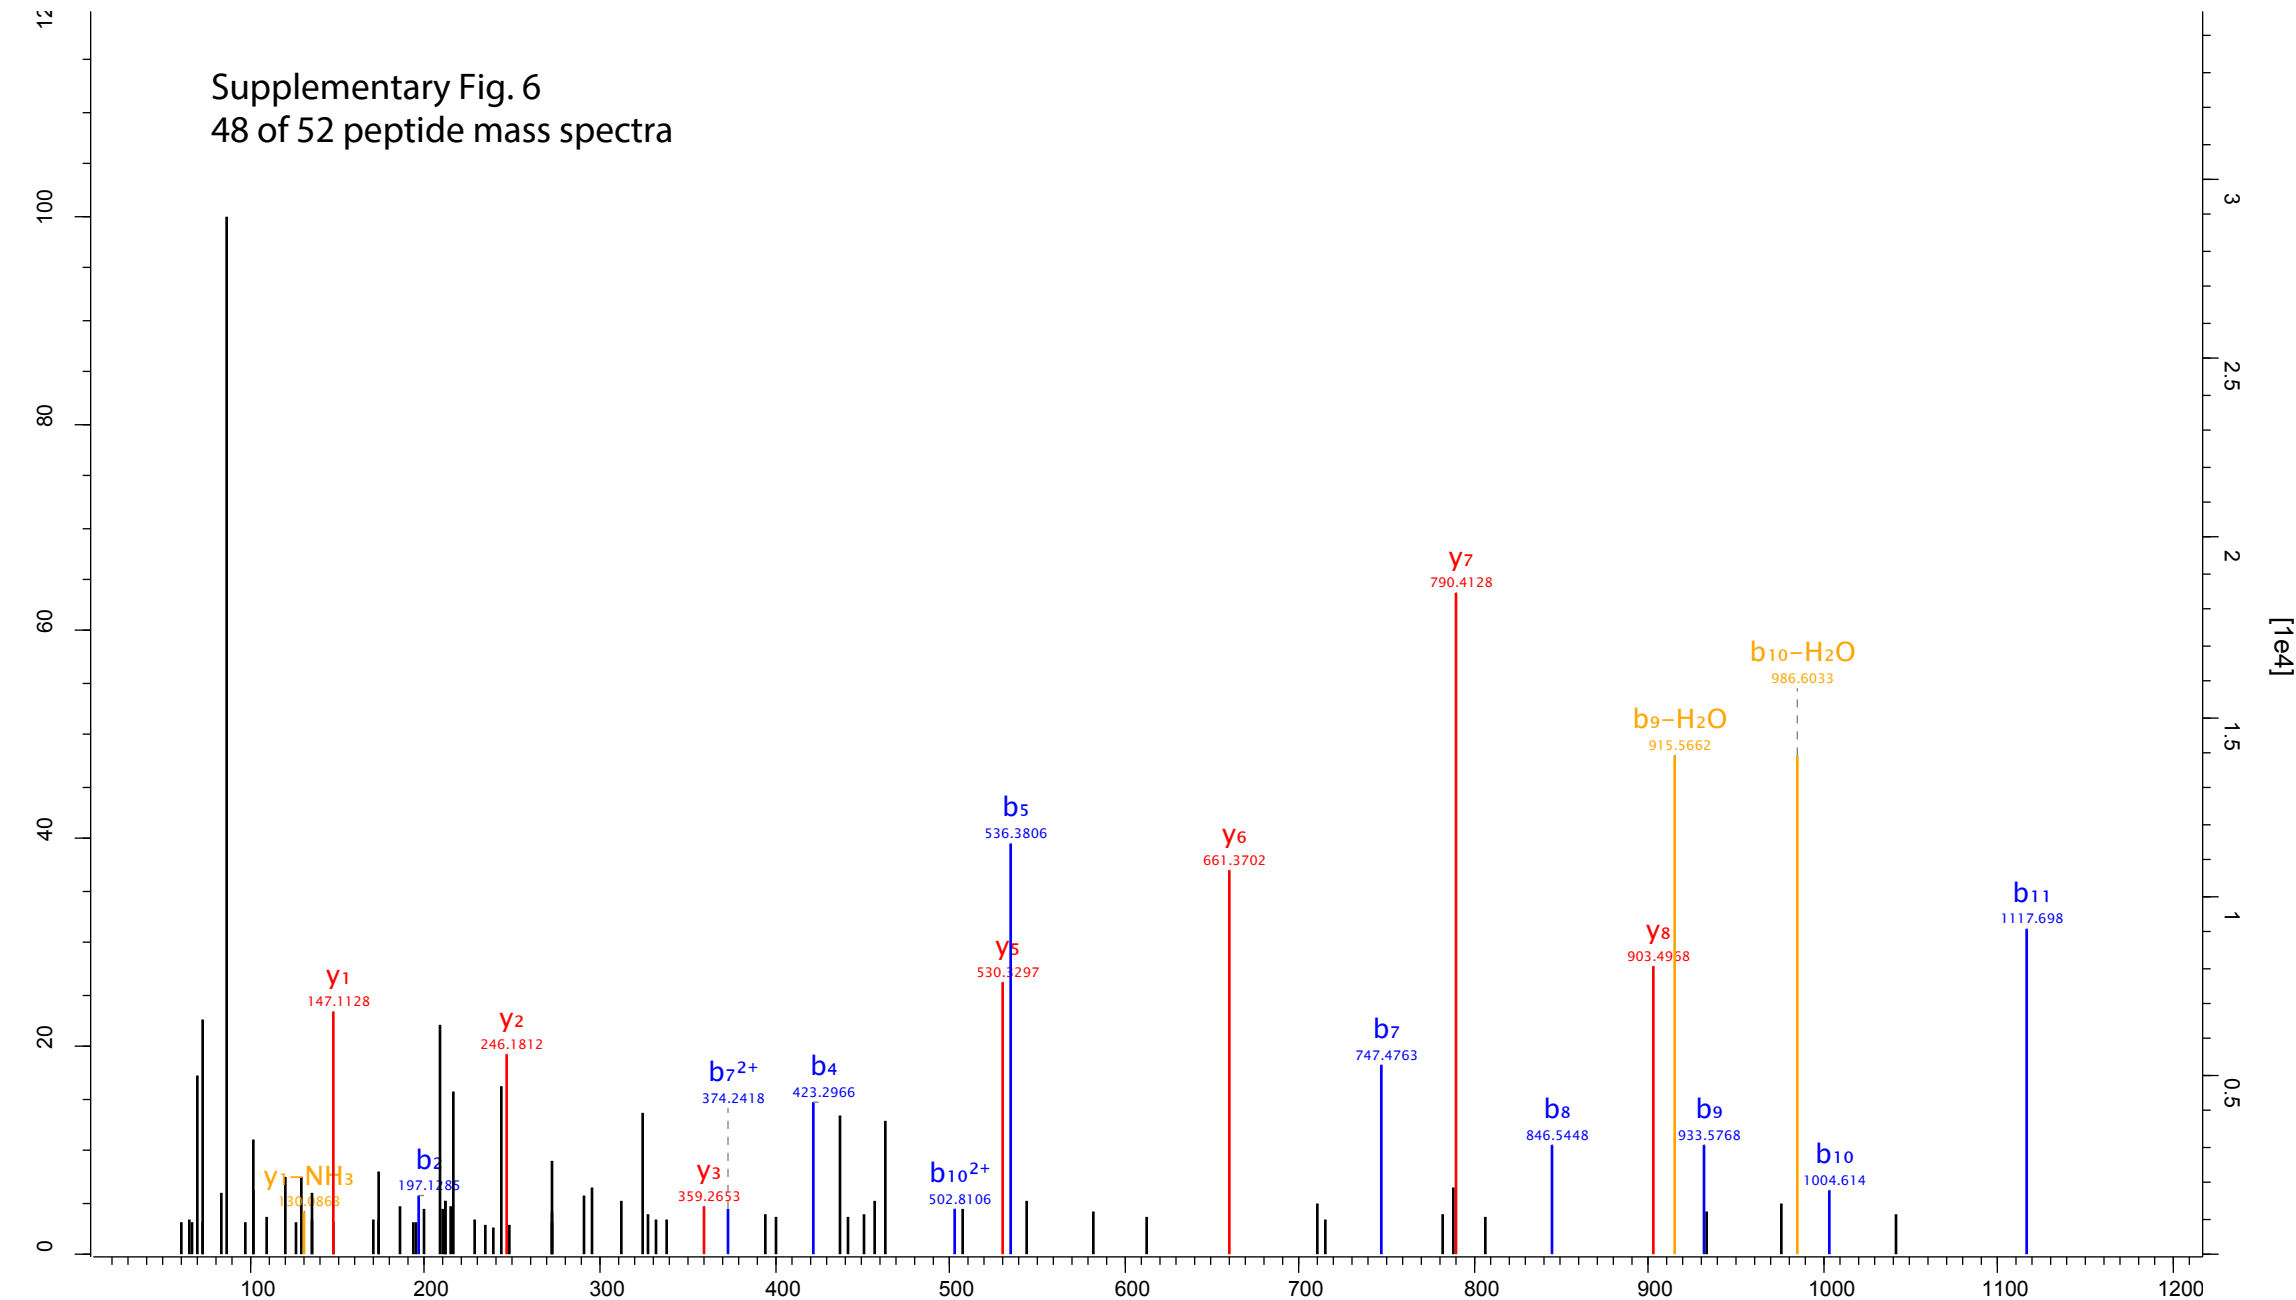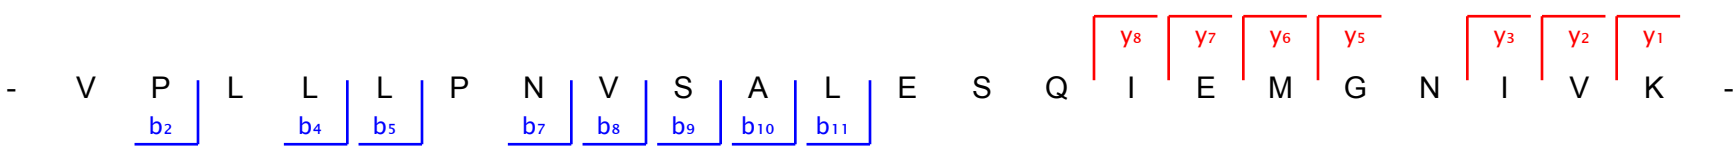

Supplementary Fig. 6  
49 of 52 peptide mass spectra

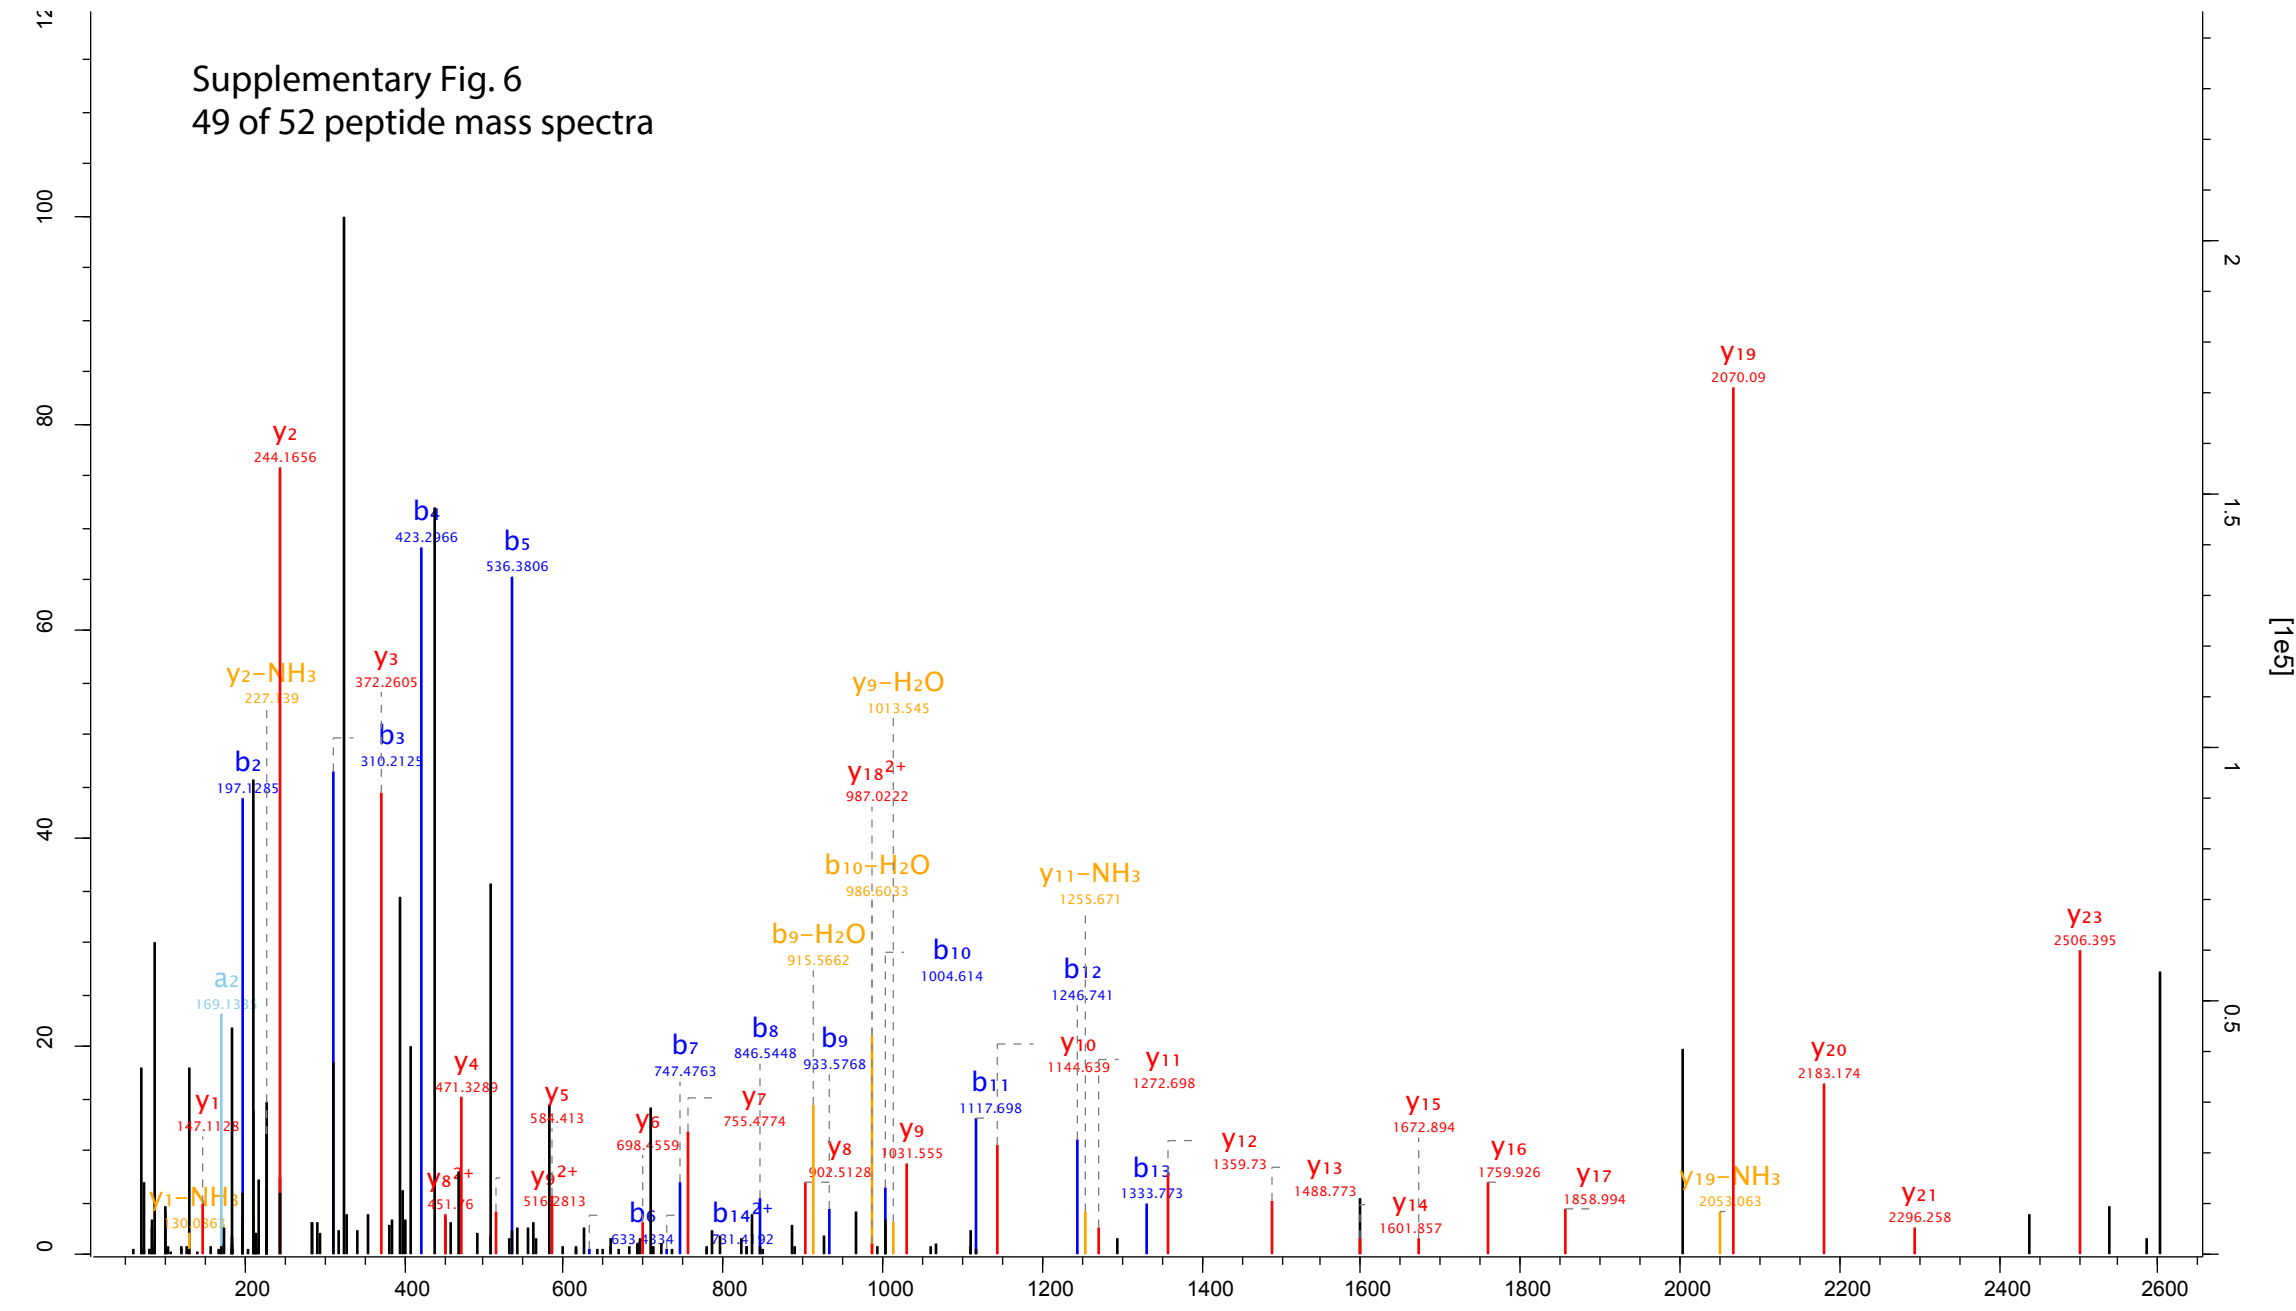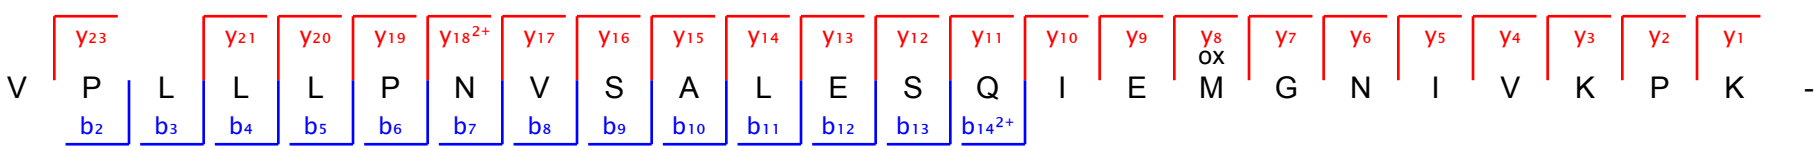

Supplementary Fig. 6  
50 of 52 peptide mass spectra

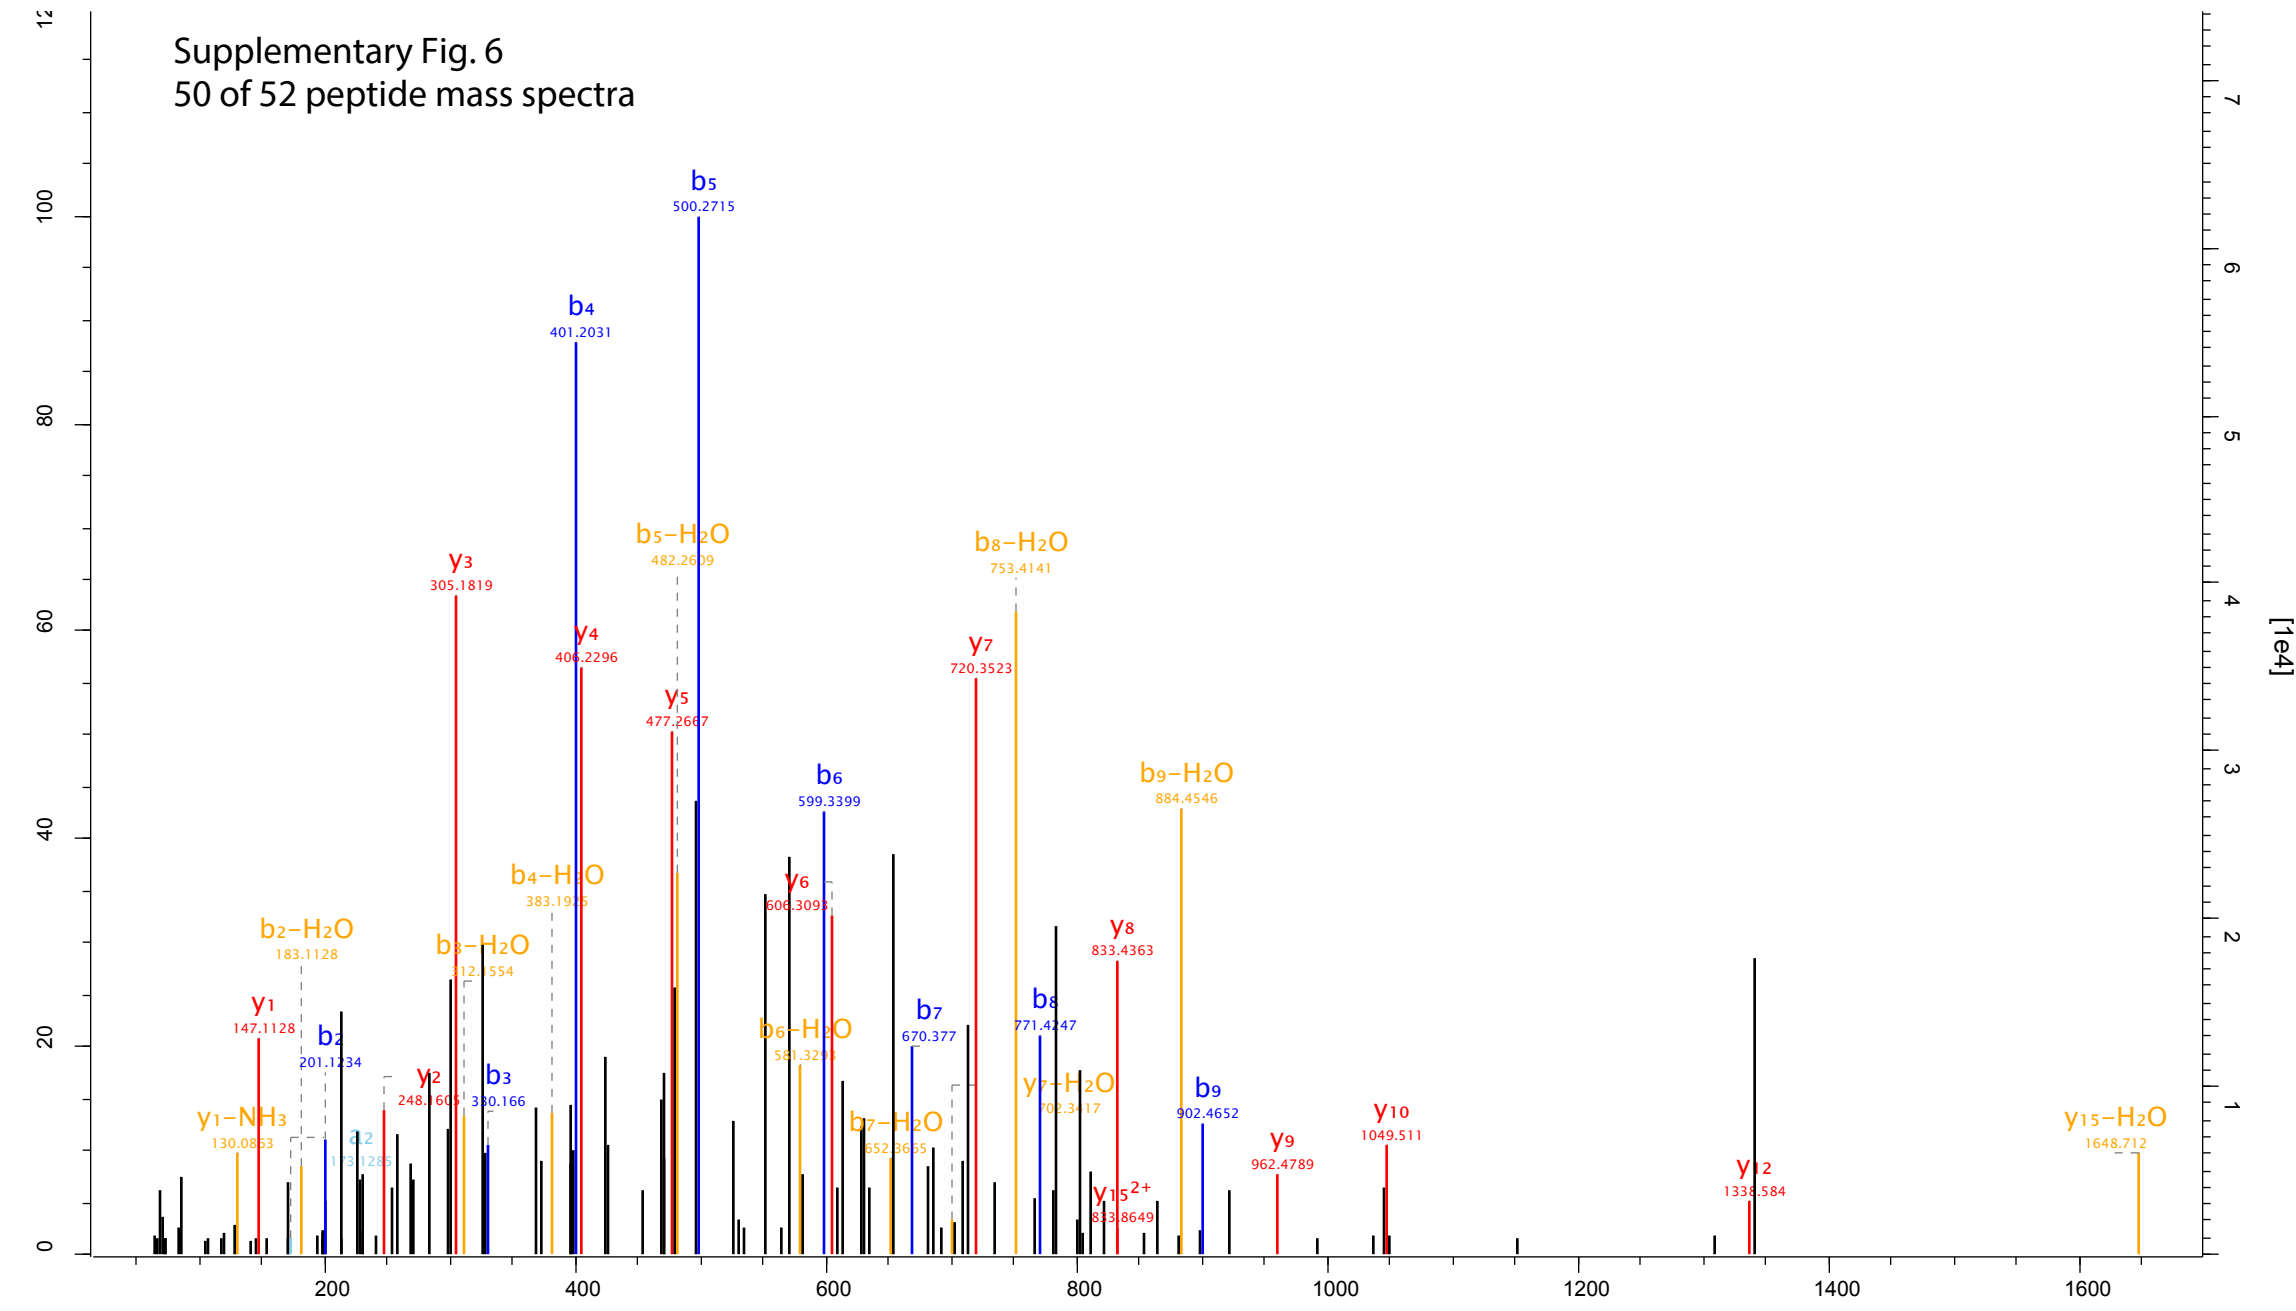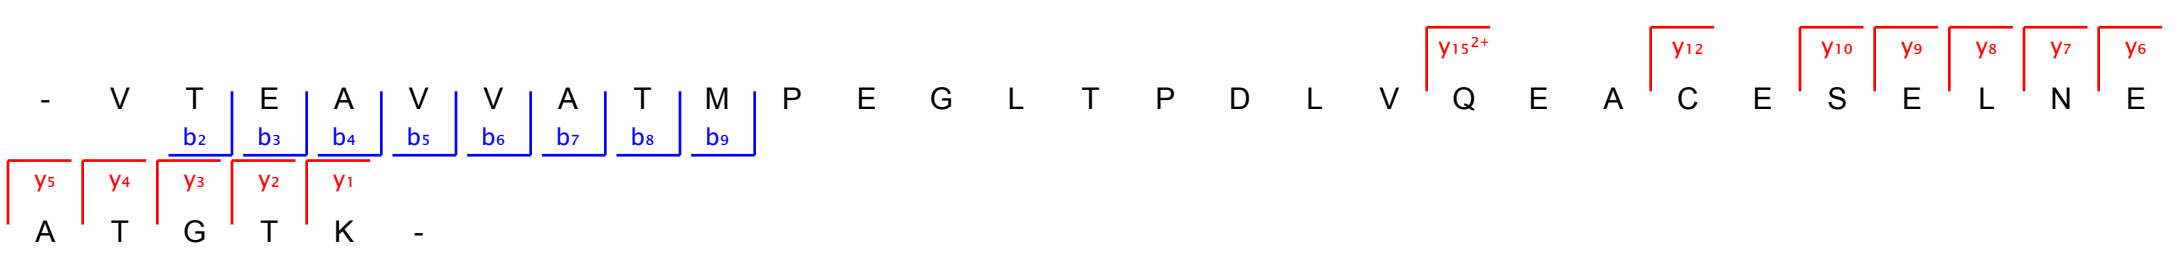

Raw file 180221\_FS1\_Li\_DMo\_cRNA\_F\_P Scan 5595 Method FTMS; HCD Score 112.02 m/z 439.9

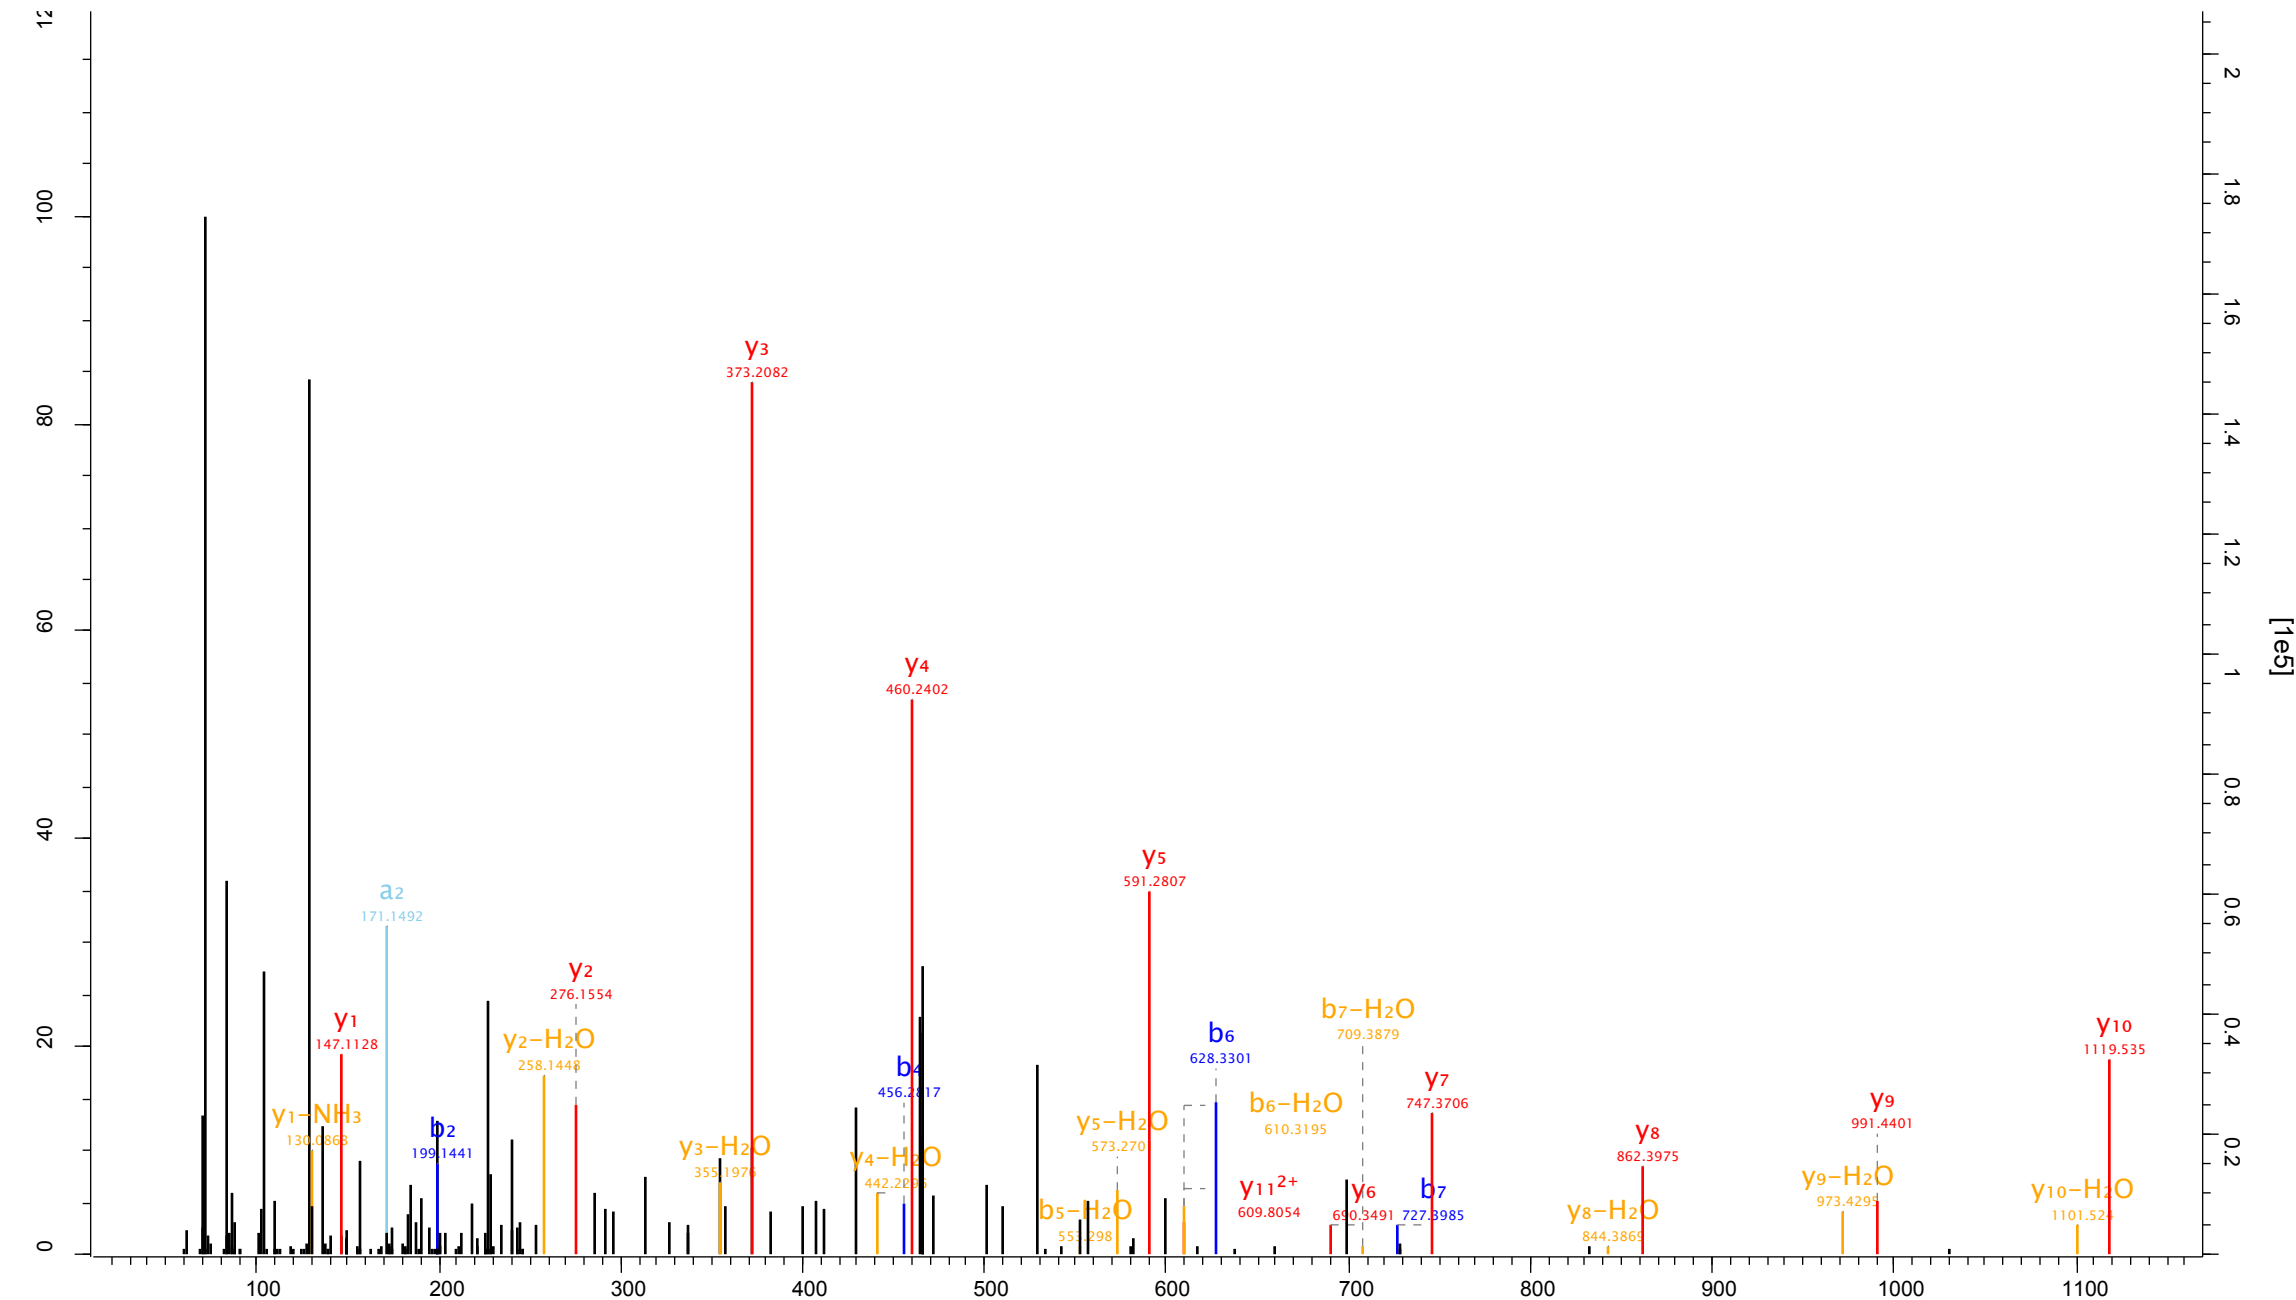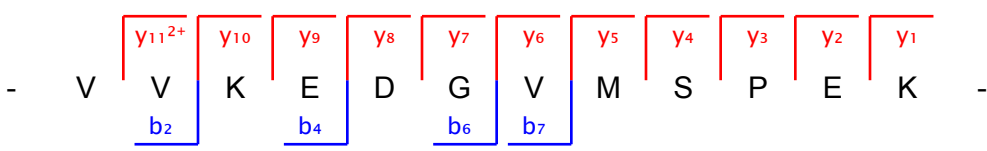

Supplementary Fig. 6  
52 of 52 peptide mass spectra

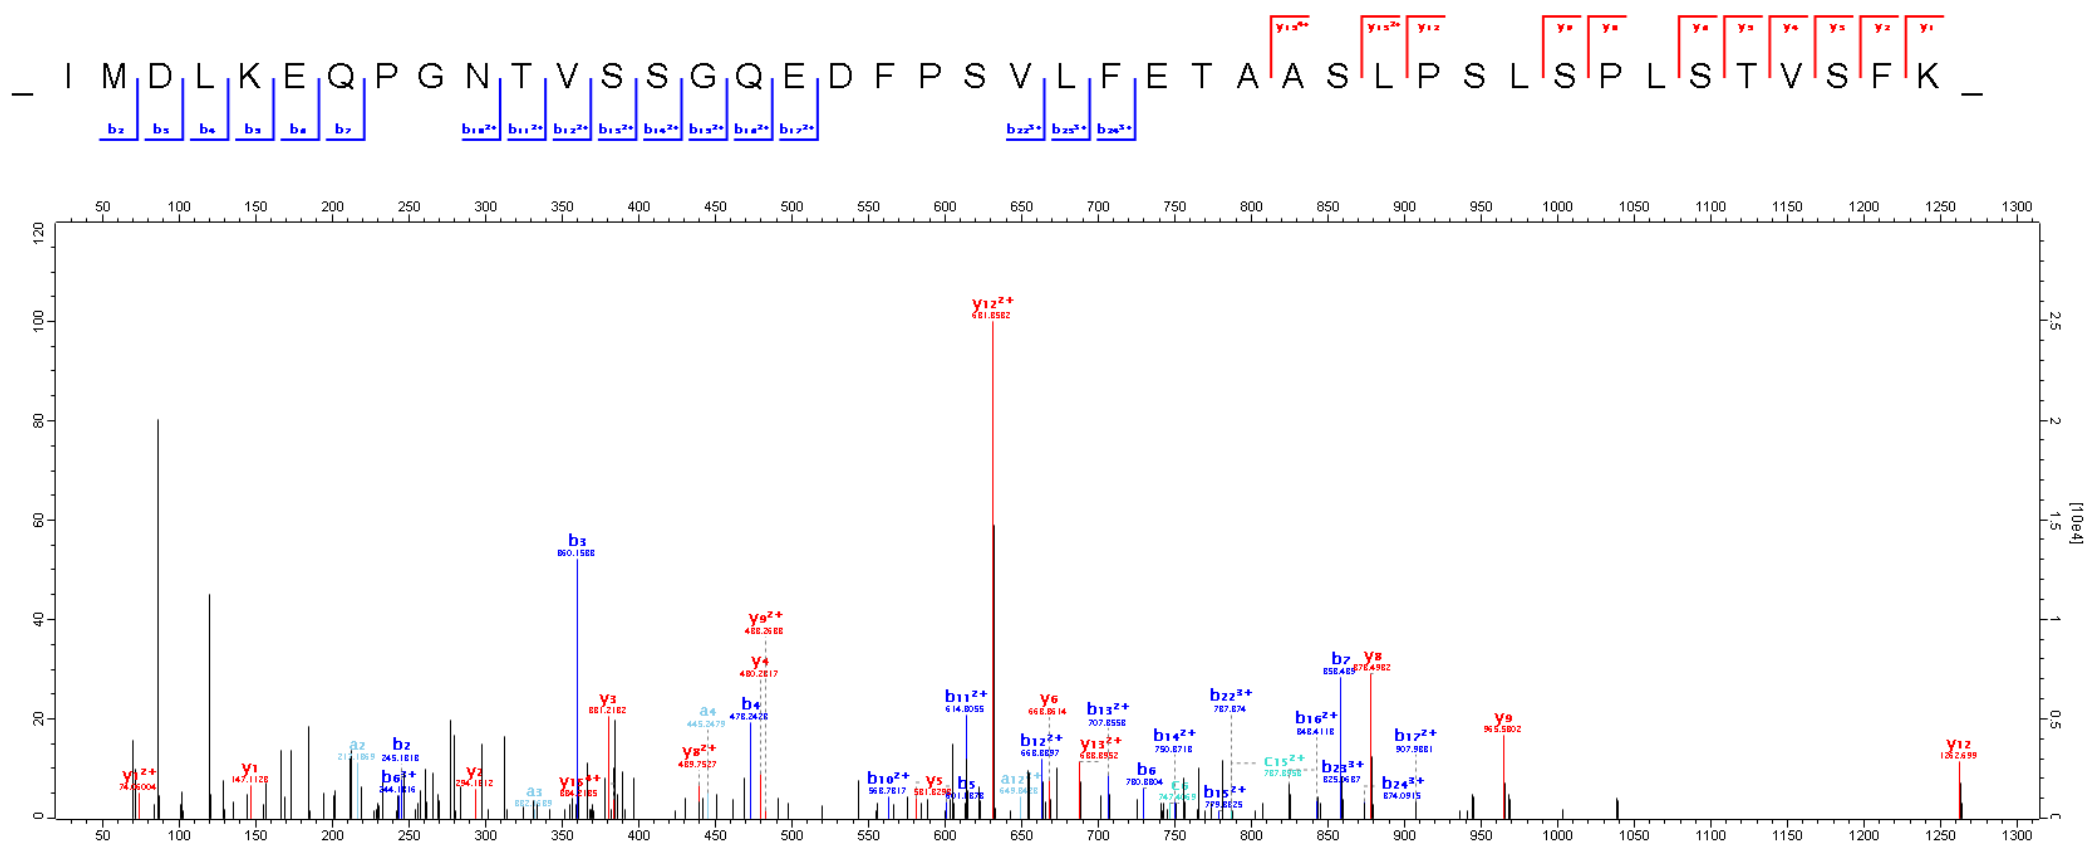



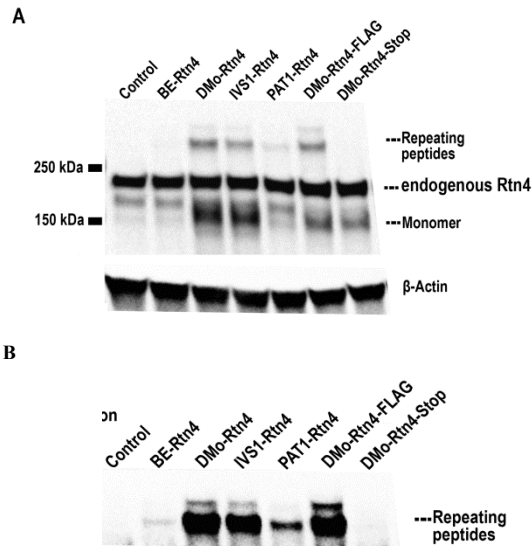

**Supplementary Fig. 7.**

**Several IMEs promote circRtn4 translation in N2a cells.**

A. Western blot with Anti-Nogo A antibody of protein isolated from N2a cells with circRtn4 overexpression. Control, empty vector; BE-Rtn4, pCircRNA-BE-Rtn4; DMO-Rtn4, pCircRNA-DMo-Rtn4; IVS1-Rtn4, pCircRNA-IVS1-Rtn4; PAT1-Rtn4, pCircRNA-PAT1-Rtn4; DMO-Rtn4-FLAG, pCircRNA-DMo-Rtn4-FLAG; DMO-Rtn4-Stop, pCircRNA-DMo-Rtn4-Stop; the high molecular weight bands larger than 250 kDa represent polypeptides from circRtn4 continuous translation; monomer designates the putative product from single round of circRtn4 translation; actin is used as loading control. B. long exposure of the high molecular weight bands larger than 250 kDa.



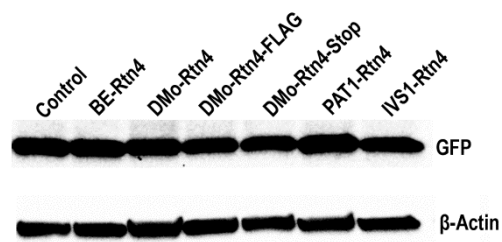

**Supplementary Fig. 9 Equal transfection efficiency from circRNA vectors.**

GFP expression from the SV40 promoter (Supplementary Fig. 1) in each circRNA expression plasmid DNA transfection in HEK293 cells was measured by Western blot analysis with antibody against GFP.  $\beta$ -Actin was used as loading control. Control, pCircRNA-DMo; BE-Rtn4, pCircRNA-BE-Rtn4; DMO-Rtn4, pCircRNA-DMo-Rtn4; DMO-Rtn4-FLAG, pCircRNA-DMo-Rtn4-FLAG; DMO-Rtn4-Stop, pCircRNA-DMo-Rtn4-Stop; PAT1-Rtn4, pCircRNA- PAT1-Rtn4; IVS1-Rtn4, pCircRNA-IVS1-Rtn4.
